# Supplementary material for: Zika virus infection modulates the metabolomic profile of microglial cells
Source: PLoS One. 2018 Oct 25;13(10):e0206093. doi: 10.1371/journal.pone.0206093 (PMC6201926; doi:10.1371/journal.pone.0206093)
Supplement: S1 Table — Concatened and processed raw data using MSDial (sheet 1) with selected biomarkers (sheet 2) described in Figs 6 and 7. (XLSX) [file pone.0206093.s002.xlsx]

## Sheet: Feuil1
Primary ID	Average Rt(min)	Average Mz	Adduct ion name	Structure rank 1	Total score	Databases	PubChem CIDs	InChIKey	SMILES	Structure rank 2	Total score	Databases	PubChem CIDs	InChIKey	SMILES	MS/MS	1	2	3	4	5	6	7	8	9	10	11	12	13	14	15	16	17	18	19	20	21	22	23	24	25	26	27	28	29	30	31	32	33
Metabolite name																	6h-M1	6h-M2	6h-M3	6h-M4	6h-M5	6h-M6	6h-PF13-1	6h-PF13-2	6h-PF13-3	6h-PF13-4	6h-PF13-5	6h-PF13-6	12h-M1	12h-M2	12h-M3	12h-M4	12h-M5	12h-M6	12h-PF13-1	12h-PF13-2	12h-PF13-3	12h-PF13-4	12h-PF13-5	12h-PF13-6	24h-M1	24h-M2	24h-M3	24h-M4	24h-M5	24h-M6	24h-PF13-1	24h-PF13-2	24h-PF13-3
Class																	Mock	Mock	Mock	Mock	Mock	Mock	PF13	PF13	PF13	PF13	PF13	PF13	Mock	Mock	Mock	Mock	Mock	Mock	PF13	PF13	PF13	PF13	PF13	PF13	Mock	Mock	Mock	Mock	Mock	Mock	PF13	PF13	PF13
Time																	6h	6h	6h	6h	6h	6h	6h	6h	6h	6h	6h	6h	12h	12h	12h	12h	12h	12h	12h	12h	12h	12h	12h	12h	24h	24h	24h	24h	24h	24h	24h	24h	24h
timeClass																	Mock_06h	Mock_06h	Mock_06h	Mock_06h	Mock_06h	Mock_06h	ZIKV_06h	ZIKV_06h	ZIKV_06h	ZIKV_06h	ZIKV_06h	ZIKV_06h	Mock_12h	Mock_12h	Mock_12h	Mock_12h	Mock_12h	Mock_12h	ZIKV_12h	ZIKV_12h	ZIKV_12h	ZIKV_12h	ZIKV_12h	ZIKV_12h	Mock_24h	Mock_24h	Mock_24h	Mock_24h	Mock_24h	Mock_24h	ZIKV_24h	ZIKV_24h	ZIKV_24h
Titration																	0	0	0	0	0	0	273333	273333	273333	273333	273333	273333	0	0	0	0	0	0	526667	526667	526667	526667	526667	526667	0	0	0	0	0	0	2752500	2752500	2752500
1268_RPNEG	21.17	480.309	[M-H]-	HMDB11130	8.8791	BMDB=BMDB11130,ChEBI=CHEBI:83047; CHEBI:75036,FooDB=FDB027909,HMDB=HMDB11130,YMDB=YMDB01204	9547068	BBYWOYAFBUOUFP-JOCHJYFZSA-N	[H]OC([H])(C([H])([H])OC(=O)C([H])([H])C([H])([H])C([H])([H])C([H])([H])C([H])([H])C([H])([H])C([H])([H])C([H])([H])C([H])([H])C([H])([H])C([H])([H])C([H])([H])C([H])([H])C([H])([H])C([H])([H])C([H])([H])C([H])([H])[H])C([H])([H])OP(=O)(O[H])OC([H])([H])C([H])([H])N([H])[H]	HMDB11129	8.8077	BMDB=BMDB11129,FooDB=FDB027908,HMDB=HMDB11129	90658453	KIHAGWUUUHJRMS-JOCHJYFZSA-N	[H]OC([H])([H])C([H])(OC(=O)C([H])([H])C([H])([H])C([H])([H])C([H])([H])C([H])([H])C([H])([H])C([H])([H])C([H])([H])C([H])([H])C([H])([H])C([H])([H])C([H])([H])C([H])([H])C([H])([H])C([H])([H])C([H])([H])C([H])([H])[H])C([H])([H])OP(=O)(O[H])OC([H])([H])C([H])([H])N([H])[H]	153.18124 39;196.03404 470;196.87682 17;205.77576 14;214.1933 213;268.94977 12;283.30228 21526;284.39609 55;339.31775 16;364.67297 18;376.13678 18;414.1994 21;417.33548 16;419.07214 67;447.103 75;451.87222 21;454.10925 10;460.80789 55;	0.0022283	0.00056537	0	0	0.000558734	0	0	0.00343254	0.00209384	0.00211707	0.0027483	0.0021713	0.00100458	0.00200052	0.00297297	0.00251653	0.0021903	0.00448135	0.0022997	0.00235978	0.00207524	0.00270439	0.00297596	0.00414824	0.00231542	0.00344938	0.00321666	0.00464099	0.00249143	0.00318606	0.00316557	0.00238879	0.00546174
121_RPNEG	11.33	215.128	[M-H]-	Undecanedioate	8.5892	BMDB=BMDB00888,ChEBI=CHEBI:73713,HMDB=HMDB00888,UNPD=UNPD161504,STOFF=SI00007907	15816	LWBHHRRTOZQPDM-UHFFFAOYSA-N	[H]OC(=O)C([H])([H])C([H])([H])C([H])([H])C([H])([H])C([H])([H])C([H])([H])C([H])([H])C([H])([H])C([H])([H])C(=O)O[H]	C00002042	7.2264	ChEBI=CHEBI:5362,KNApSAcK=C00002042,UNPD=UNPD188246	442638	HNFAREZIVBKEJQ-UHFFFAOYNA-N	[H]OC1=C([H])C([H])=C(C([H])=C1([H]))C([H])(C#N)N2C([H])([H])C([H])([H])C([H])([H])C([H])([H])C2([H])([H])	129.39188 12;153.30168 1218;177.0696 13;187.3418 17;197.20082 1719;215.13214 99;	0.000451627	0.000472994	0.000382637	0.000443047	0.00042881	0.000393744	0.00132325	0.000719593	0.00121877	0.00122385	0.0014242	0.00140298	0.00163216	0.00111219	0.00152518	0.00214104	0.00209988	0.00251127	0.00142374	0.00151117	0.00148342	0.00162634	0.0016255	0.00176673	0.00121059	0.00142146	0.00133734	0.00167646	0.00117354	0.00120468	0.00199062	0.00150079	0.00182987
256_RPPOS	15.55	387.193	[M+H]+	HMDB35212	8.2008	FooDB=FDB013859,HMDB=HMDB35212,UNPD=UNPD123929; UNPD45461	-1	BLQCWBCWZFDGBW-AATRIKPKNA-N	[H]OC([H])([H])C2([H])(OC([H])(OC1([H])(C([H])([H])C(C(C([H])=C([H])C(=O)C([H])([H])[H])=C(C([H])([H])[H])C1([H])(O[H]))(C([H])([H])[H])C([H])([H])[H]))C([H])(O[H])C([H])(O[H])C2([H])(O[H]))	HMDB30370	7.7694	ChEBI=CHEBI:69850,FooDB=FDB002216,HMDB=HMDB30370,KNApSAcK=C00029980,UNPD=UNPD36829; UNPD87500	14312562	XTODSGVDHGMKSN-SIEIHWOKSA-N	[H]OC([H])([H])C2([H])(OC([H])(OC1(C(=C=C([H])C(=O)C([H])([H])[H])C(C([H])([H])[H])(C([H])([H])[H])C([H])([H])C([H])(O[H])C1([H])([H]))(C([H])([H])[H]))C([H])(O[H])C([H])(O[H])C2([H])(O[H]))	169.49481 41;175.1427 405;181.03488 72;201.09482 23;227.23483 120;231.13846 231;252.9191 16;261.27341 17;272.94177 11;275.11429 1086;277.33887 38;283.25925 17;284.32217 10;287.29736 42;289.23352 19;301.18591 18;323.21594 10;326.47974 12;327.46741 61;331.07452 101767;332.19794 101;350.05994 26;351.17798 37;368.36356 267;369.32343 117;370.19843 22;372.10062 24;	0.00250188	0.0021859	0.0026325	0.00434915	0.00294621	0.00306163	0.00484668	0.00331733	0.00395944	0.00413881	0.00328512	0.00276315	0.0257401	0.0483489	0.026359	0.0148423	0.0121352	0.00870389	0.0745123	0.00488429	0.0697609	0.0575717	0.0377911	0.0298674	0.00441961	0.027065	0.006955	0.00836926	0.0410492	0.0504749	0.00555715	0.00387185	0.0159731
424_RPPOS	1.77	613.159	[M+H]+	HMDB03337	7.9784	BMDB=BMDB03337,ChEBI=CHEBI:17858; CHEBI:58297,DrugBank=DB03310,FooDB=FDB023147,HMDB=HMDB03337,PlantCyc=OXIDIZED-GLUTATHIONE,PubChem=65359; 11767258; 25245992; 975,SMPDB=PW_C001847,UNPD=UNPD51013,YMDB=YMDB00057	65359	YPZRWBKMTBYPTK-UHFFFAOYNA-N	[H]OC(=O)C([H])([H])N([H])C(=O)C([H])(N([H])C(=O)C([H])([H])C([H])([H])C([H])(C(=O)O[H])N([H])[H])C([H])([H])SSC([H])([H])C([H])(C(=O)N([H])C([H])([H])C(=O)O[H])N([H])C(=O)C([H])([H])C([H])([H])C([H])(C(=O)O[H])N([H])[H]							181.08351 22;193.24847 12;199.08502 24;209.22011 73;210.9501 210;217.02936 26;231.02449 176;235.12808 102;257.39282 13;262.01825 14;287.98969 55;298.15326 27;321.90402 13;337.31061 99;355.01825 10515;371.33594 25;390.97186 12;408.92712 509;421.15277 27;461.10858 14;466.13446 691;483.93298 13416;484.60065 51;496.47504 20;514.52979 11;519.75458 12;538.0592 343;548.03961 21;549.43024 11;551.23712 13…	0.000383214	0.000354421	0.000272488	0.000439264	0.000333647	0.000218847	0.000566698	0.000267041	0.000323699	0.000257185	0.000294907	0.000296866	0.000720211	0.000290562	0.000486767	0.000698931	0.000719782	0.000523317	0.000692053	0.000636605	0.000533585	0.000854505	0.000499378	0.000740313	0.00100635	0.000232394	0.00120831	0.000627506	0.00153972	0.000555132	0.00154159	0.00101193	0.00113742
1229_RPNEG	18.87	452.277	[M-H]-	HMDB11503	7.9538	BMDB=BMDB11503,ChEBI=CHEBI:73134; CHEBI:73004,FooDB=FDB028219,HMDB=HMDB11503,SMPDB=PW_C007100,YMDB=YMDB01197	58177710	YVYMBNSKXOXSKW-HXUWFJFHSA-N	[H]OC([H])(C([H])([H])OC(=O)C([H])([H])C([H])([H])C([H])([H])C([H])([H])C([H])([H])C([H])([H])C([H])([H])C([H])([H])C([H])([H])C([H])([H])C([H])([H])C([H])([H])C([H])([H])C([H])([H])C([H])([H])[H])C([H])([H])OP(=O)(O[H])OC([H])([H])C([H])([H])N([H])[H]	HMDB11473	7.8467	BMDB=BMDB11473,FooDB=FDB028189,HMDB=HMDB11473	53480922	CKPBBEOJHAPPBT-HXUWFJFHSA-N	[H]OC([H])([H])C([H])(OC(=O)C([H])([H])C([H])([H])C([H])([H])C([H])([H])C([H])([H])C([H])([H])C([H])([H])C([H])([H])C([H])([H])C([H])([H])C([H])([H])C([H])([H])C([H])([H])C([H])([H])C([H])([H])[H])C([H])([H])OP(=O)(O[H])OC([H])([H])C([H])([H])N([H])[H]	135.2919 10;153.32925 26;196.18436 410;214.04044 205;237.51935 19;255.20993 18909;256.16949 12;324.18341 20;334.86465 18;350.54578 11;379.3179 15;383.83444 13;391.02914 40;425.0083 21;432.85974 29;	0.00253984	0	0	0	0.000507967	0	0.00135498	0.00403911	0.00267886	0.00238772	0.00289491	0.00271759	0.00173506	0.00279732	0.00377143	0.00399585	0.00303414	0.00592625	0.00259012	0.00333096	0.00351296	0.00388982	0.00422731	0.00527916	0.00282387	0.00663613	0.00510378	0.00695919	0.00411428	0.00498541	0.00600354	0.00467463	0.00988669
44_HilicNeg	4.49	265.148	[M-H]-	Lauryl sulfate	7.8928	ChEBI=CHEBI:8984; CHEBI:45599; CHEBI:23872,DrugBank=DB00815; DB03967,PubChem=3423265; 8778,T3DB=T3D3620; T3D3629,STOFF=SI00005835	16700	MOTZDAYCYVMXPC-UHFFFAOYSA-N	[H]OS(=O)(=O)OC([H])([H])C([H])([H])C([H])([H])C([H])([H])C([H])([H])C([H])([H])C([H])([H])C([H])([H])C([H])([H])C([H])([H])C([H])([H])C([H])([H])[H]	HMDB40905	7.1177	FooDB=FDB020741,HMDB=HMDB40905,UNPD=UNPD142470	-1	WZUJTFLPWFXBST-UHFFFAOYNA-N	[H]C1=C(C(=O)OC1([H])([H]))C2([H])(OC(C([H])([H])[H])(C([H])([H])C(=O)C([H])([H])C([H])(C([H])([H])[H])C([H])([H])[H])C([H])([H])C2([H])([H]))	79.60857 34;80.3186 224;97.20077 18626;98.01373 73;98.93191 15;179.4955 29;195.49959 41;237.06781 58;	0.0169747	0.01311	0.0089323	0.00964613	0.00681639	0.00538696	0.0058498	0.0058624	0.00102292	0.00596665	0.00550884	0.0143075	0.00159692	0.00206299	0.00165112	0.00163104	0.00130648	2.48088e-05	0.00230668	0.000395453	0.0026432	0.000368648	0.0225392	0	0.00628929	0.00651769	0.00368375	0.00370444	0.00338257	0.00367312	0.00465872	0.00652623	0.00434863
198_RPPOS	17.7	314.269	[M+H]+	C00002067	7.8923	ChEBI=CHEBI:43,KNApSAcK=C00002067,UNPD=UNPD42780; UNPD182029	442654	KYBOBXNXZQTAKA-NXHRZFHOSA-N	[H]OC([H])([H])C1([H])(N([H])C([H])(C([H])([H])C([H])([H])C([H])([H])C([H])([H])C([H])([H])C([H])([H])C([H])([H])C([H])([H])C([H])([H])C(=O)C([H])([H])C([H])([H])[H])C([H])([H])C([H])([H])C1([H])(O[H]))	Palmitoylglycine	6.9369	DrugBank=DB03440,HMDB=HMDB13034,PubChem=151008	151008	KVTFEOAKFFQCCX-UHFFFAOYSA-N	[H]OC(=O)C([H])([H])N([H])C(=O)C([H])([H])C([H])([H])C([H])([H])C([H])([H])C([H])([H])C([H])([H])C([H])([H])C([H])([H])C([H])([H])C([H])([H])C([H])([H])C([H])([H])C([H])([H])C([H])([H])C([H])([H])[H]	146.34387 14;161.32672 32;171.23573 12;183.99437 11;185.05989 12;186.42772 14;197.13232 11;213.85754 21;225.26767 35;229.51013 19;240.1207 12;244.27246 20;246.29089 16;250.61685 10;255.0267 99;278.37555 13;279.50699 36;283.24222 15;285.75183 37;290.07812 16;290.87308 25;291.7439 26;296.12769 179;297.21628 3848;313.3739 46;	0	0	9.01425e-05	9.53674e-05	4.99756e-05	6.4368e-05	0.000190378	0	0	0	4.90287e-05	0	0.000413553	0.000323051	3.5859e-05	0.000231197	0.000399206	3.17518e-05	0.000322722	0	0.000219087	0.000354367	0.000291207	0.000327349	0	0.000168227	0.000103537	0	0	0	0	0	2.8215e-05
37_HilicNeg	5.36	227.202	[M-H]-	Tetradecanoic acid	7.8183	BMDB=BMDB00806,ChEBI=CHEBI:28875; CHEBI:30807,DrugBank=DB08231,FooDB=FDB009749; FDB008926; FDB010274; FDB018744; FDB009057; FDB010128,HMDB=HMDB00806,KNApSAcK=C00001228,PlantCyc=CPD-7836,PubChem=11005,SMPDB=PW_C000643,T3DB=T3D4599,UNPD=UNPD144583,YMDB=YMDB00679,STOFF=SI00000105	90472805	TUNFSRHWOTWDNC-UHFFFAOYSA-N	[H]OC(=O)C([H])([H])C([H])([H])C([H])([H])C([H])([H])C([H])([H])C([H])([H])C([H])([H])C([H])([H])C([H])([H])C([H])([H])C([H])([H])C([H])([H])C([H])([H])[H]	HMDB32548	7.5211	FooDB=FDB010437,HMDB=HMDB32548	-1	ZOJCTKZSRSUPTO-UHFFFAOYNA-N	[H]C([H])([H])C([H])([H])C([H])([H])C([H])([H])C([H])([H])C([H])([H])C([H])([H])C([H])([H])C([H])([H])C([H])([H])C1([H])(OC([H])([H])C([H])(O1)C([H])([H])[H])	139.44267 11;141.21107 17;155.1649 24;165.41386 10;168.95268 16;195.53279 13;199.40575 11;209.21553 160;	0.00942545	0.0101	0.0102293	0.0106299	0.00982914	0.0112453	0.0118	0.00943096	0.000582954	0.0122838	0.00931452	0.0111183	0.0196393	0.0185887	0.0144699	0.0180528	0.0207031	0.0113824	0.0168753	0.000240055	0.0180618	0.000285959	0.109559	0.0172854	0.0120944	0.0177275	0.0152906	0.0180208	0.0154527	0.0121966	0.0178486	0.0125692	0.0150537
12_HilicNeg	20.07	146.046	[M-H]-	HMDB00148; HMDB03339; HMDB60475	7.8031	BMDB=BMDB00148; BMDB03339,ChEBI=CHEBI:64220; CHEBI:64243; CHEBI:64244; CHEBI:15966; CHEBI:16015; CHEBI:18237; CHEBI:29985; CHEBI:29986; CHEBI:14321; CHEBI:29987; CHEBI:29988; CHEBI:29989; CHEBI:76051,DrugBank=DB00142,ECMDB=ECMDB00148,FooDB=FDB023148; FDB012534,HMDB=HMDB00148; HMDB03339; HMDB60475,KNApSAcK=C00001358,PlantCyc=GLT; D-GLT,PubChem=23327; 33032; 5460299; 5460297; 611,SMPDB=PW_C000095; …	56927896	WHUUTDBJXJRKMK-UHFFFAOYNA-N	[H]OC(=O)C([H])([H])C([H])([H])C([H])(C(=O)O[H])N([H])[H]	(2S)-3-acetoxy-2-ammoniopropanoate	7.6602	BMDB=BMDB03011,ChEBI=CHEBI:58340; CHEBI:17981,DrugBank=DB01837,ECMDB=ECMDB03011,FooDB=FDB023094,HMDB=HMDB03011,KNApSAcK=C00007459,PlantCyc=ACETYLSERINE,PubChem=99478; 6995274; 189,YMDB=YMDB00652	99478	VZXPDPZARILFQX-BYPYZUCNSA-N	[H]OC(=O)C([H])(N([H])[H])C([H])([H])OC(=O)C([H])([H])[H]	128.19507 2296;129.01065 16;	9.35047e-05	0.000224818	0.000195368	0.000225845	0.000208119	0.0001195	0.000433597	0.000384551	0	0.000648171	0.000381545	0.000327518	0.00170565	0.00108662	0.000255586	0.00180319	0.00135333	0.000151207	0.00290201	0	0.024207	0	0	0.00732394	0.0053779	0.016847	0.00494712	0.0131965	0.00898328	0.0055319	0.00955778	0.0049288	0.00556008
315_RPPOS	18.34	454.293	[M+H]+	HMDB11503	7.72	BMDB=BMDB11503,ChEBI=CHEBI:73134; CHEBI:73004,FooDB=FDB028219,HMDB=HMDB11503,SMPDB=PW_C007100,YMDB=YMDB01197	58177710	YVYMBNSKXOXSKW-HXUWFJFHSA-N	[H]OC([H])(C([H])([H])OC(=O)C([H])([H])C([H])([H])C([H])([H])C([H])([H])C([H])([H])C([H])([H])C([H])([H])C([H])([H])C([H])([H])C([H])([H])C([H])([H])C([H])([H])C([H])([H])C([H])([H])C([H])([H])[H])C([H])([H])OP(=O)(O[H])OC([H])([H])C([H])([H])N([H])[H]	HMDB11473	7.6129	BMDB=BMDB11473,FooDB=FDB028189,HMDB=HMDB11473	53480922	CKPBBEOJHAPPBT-HXUWFJFHSA-N	[H]OC([H])([H])C([H])(OC(=O)C([H])([H])C([H])([H])C([H])([H])C([H])([H])C([H])([H])C([H])([H])C([H])([H])C([H])([H])C([H])([H])C([H])([H])C([H])([H])C([H])([H])C([H])([H])C([H])([H])C([H])([H])[H])C([H])([H])OP(=O)(O[H])OC([H])([H])C([H])([H])N([H])[H]	198.17532 13;216.28598 13;235.91258 17;270.55725 15;282.39011 57;283.58383 27;313.2363 7081;313.84735 57;342.61115 25;363.11139 19;363.98315 13;366.44144 16;371.31894 22;376.57544 11;378.21573 16;388.67374 10;396.33337 16;397.31955 17;418.07565 13;421.48245 27;429.14407 19;431.30377 13;436.10336 227;437.15668 98;	0	0.000216325	1.30743e-06	2.27515e-05	4.80767e-05	0	0.000327706	0.000179877	0.000213054	8.24616e-05	0.000217284	0	0.000237264	0.000306156	0.000348554	0.000364462	0.000362316	0.000367597	0.000188205	0.00015811	0.000392235	0.000330625	0.000449392	0.000354583	0.000210904	0.000378405	0.000382425	0.000419398	0.000375155	0.000355757	0.000309888	0.000473867	0.000317394
309_RPPOS	13.82	451.164	[M+H]+	CHEBI:2515	7.7148	ChEBI=CHEBI:2515,UNPD=UNPD79515	53297353	AJNRZGCOXRHMEZ-ZDRHXKJUSA-N	[H]OC1=C([H])C([H])=C(C([H])=C1([H]))C(=O)OC([H])([H])C3=C([H])C([H])([H])C4([H])(C([H])=C([H])OC([H])(OC2([H])(OC([H])(C([H])([H])O[H])C([H])(O[H])C([H])(O[H])C2([H])(O[H])))C34([H]))	CHEBI:66207	7.1633	ChEBI=CHEBI:66207,UNPD=UNPD194058	16091523	KCKBTWNNYSDHSE-MIUGBVLSSA-N	[H]OC1=C([H])C([H])=C(C([H])=C1([H]))C([H])([H])C([H])([H])OC3([H])(OC([H])(C([H])([H])O[H])C([H])(O[H])C([H])(O[H])C3([H])(OC(=O)C([H])([H])C2=C([H])C([H])=C(O[H])C(O[H])=C2([H])))	135.24899 17;136.00812 16;147.27686 15;149.40292 18;165.23285 100;175.1013 45;192.77097 16;205.36397 15;206.25323 25;219.57089 14;221.22455 20;234.08208 27;241.02652 38;249.06326 42;255.22708 62;257.13049 14;275.20212 56;277.38998 44;279.30701 44;283.00562 21;292.30481 21;293.23068 32;294.14606 35;295.45776 16;305.35236 21;308.33368 16;312.06299 20;312.93506 44;320.91391 116;322.93689 30;325.0601…	0.00120998	0.0008466	0.00114339	0.00141079	0.00105812	0.000679816	0.00167075	0.000895317	0.00110644	0.00158206	0.000823818	0.000738344	0.00872812	0.0091412	0.00764829	0.00605196	0.00334996	0.00263258	0.00820123	0.00106753	0.00467084	0.00624851	0.00763648	0.00774412	0.000908014	0.00128219	0.00207656	0.000371435	0.00407697	0.0024722	0.00221093	0.000608216	0.0033643
49_RPNEG	6.16	159.066	[M-H]-	Heptanedioic acid	7.6456	BMDB=BMDB00857,ChEBI=CHEBI:30531; CHEBI:17774; CHEBI:36165,DrugBank=DB01856,ECMDB=ECMDB00857,HMDB=HMDB00857,KNApSAcK=C00001199,PlantCyc=CPD-205,PubChem=385; 5242388,UNPD=UNPD188581,STOFF=SI00001095	385	WLJVNTCWHIRURA-UHFFFAOYSA-N	[H]OC(=O)C([H])([H])C([H])([H])C([H])([H])C([H])([H])C([H])([H])C(=O)O[H]	HMDB00555	7.4671	BMDB=BMDB00555,ChEBI=CHEBI:68503,FooDB=FDB022115,HMDB=HMDB00555,UNPD=UNPD136353	6999745	SYEOWUNSTUDKGM-YFKPBYRVSA-N	[H]OC(=O)C([H])([H])C([H])([H])C([H])(C([H])([H])[H])C([H])([H])C(=O)O[H]	97.37949 728;101.2437 15;141.23305 80;	0.00161127	0.00152659	0.00177374	0.00174257	0.00170007	0.00184617	0.00178564	0.00244285	0.0018873	0.00149128	0.0017693	0.00194741	0.00142887	0.00171008	0.00186499	0.00187409	0.00167989	0.00347725	0.00196573	0.00174103	0.00128846	0.00196891	0.00176732	0.00204457	0.00126077	0.00191329	0.00152863	0.00171982	0.00134799	0.00140127	0.00257517	0.00203609	0.00232685
28_HilicNeg	5.54	199.171	[M-H]-	lauric acid	7.6395	BMDB=BMDB00638,ChEBI=CHEBI:30805; CHEBI:18262,FooDB=FDB011453; FDB017356; FDB011454; FDB017359; FDB011455,HMDB=HMDB00638,KNApSAcK=C00001221,PlantCyc=DODECANOATE,PubChem=3893; 4149208,SMPDB=PW_C000497,T3DB=T3D4596,UNPD=UNPD141768,YMDB=YMDB00678,STOFF=SI00000167	61320	POULHZVOKOAJMA-UHFFFAOYSA-N	[H]OC(=O)C([H])([H])C([H])([H])C([H])([H])C([H])([H])C([H])([H])C([H])([H])C([H])([H])C([H])([H])C([H])([H])C([H])([H])C([H])([H])[H]	HMDB32440	7.2598	FooDB=FDB009940,HMDB=HMDB32440	-1	AGNUIQKIUPCFET-UHFFFAOYNA-N	[H]C([H])([H])C([H])([H])C([H])([H])C([H])([H])C([H])([H])C([H])([H])C([H])([H])C([H])([H])C1([H])(OC([H])([H])C([H])(O1)C([H])([H])[H])	137.28087 45;155.38567 70;171.15189 42;181.39934 41;	0.00667903	0.0083669	0.00770785	0.00739169	0.00759813	0.00698041	0.00770575	0.00697795	0	0.00862976	0.00602596	0.00880569	0.0154339	0.0128758	0.0118582	0.0175576	0.0175221	0.0106154	0.0104312	0.000650673	0.0132865	0.000294078	0.041113	0.00866262	0.00954521	0.0139404	0.0170024	0.01877	0.00975355	0.0115488	0.0147835	0.0109164	0.0153106
45_HilicNeg	5.2	269.248	[M-H]-	HEPTADECANOIC ACID	7.6218	BMDB=BMDB02259,ChEBI=CHEBI:32365; CHEBI:32366,HMDB=HMDB02259,KNApSAcK=C00007426,UNPD=UNPD18637,YMDB=YMDB02302	10465	KEMQGTRYUADPNZ-UHFFFAOYSA-N	[H]OC(=O)C([H])([H])C([H])([H])C([H])([H])C([H])([H])C([H])([H])C([H])([H])C([H])([H])C([H])([H])C([H])([H])C([H])([H])C([H])([H])C([H])([H])C([H])([H])C([H])([H])C([H])([H])C([H])([H])[H]	HMDB40598	7.5147	FooDB=FDB020384,HMDB=HMDB40598,UNPD=UNPD132837	-1	AOKNWGQMRWJWFS-UHFFFAOYNA-N	[H]OC(=O)C([H])([H])C([H])([H])C([H])([H])C([H])([H])C([H])([H])C([H])([H])C([H])([H])C([H])([H])C([H])([H])C([H])(C([H])([H])[H])C([H])([H])C([H])([H])C([H])([H])C([H])([H])C([H])([H])[H]	155.19786 27;181.36905 33;207.52144 32;223.18292 10;225.38887 268;235.15004 28;241.32251 23;251.2603 323;	0.00495882	0.00539368	0.0056617	0.00611573	0.00524816	0.00658144	0.00666091	0.00554933	0.00186299	0.00679665	0.00518812	0.00610675	0.00925106	0.00866497	0.00686983	0.00930658	0.0094196	0.00664532	0.00845906	0.00079715	0.00934617	0.00104528	0.0682015	0.00956381	0.00658567	0.00792862	0.00769078	0.00958963	0.00807952	0.0069737	0.00823727	0.00771464	0.0085419
377_RPPOS	7.11	520.333	[M+H]+	HMDB10386	7.5557	BMDB=BMDB10386,ChEBI=CHEBI:28733,FooDB=FDB027537,HMDB=HMDB10386,PlantCyc=CPD-8347,UNPD=UNPD43989,YMDB=YMDB02212	11005824	SPJFYYJXNPEZDW-FTJOPAKQSA-N	[H]OC([H])(C([H])([H])OC(=O)C([H])([H])C([H])([H])C([H])([H])C([H])([H])C([H])([H])C([H])([H])C([H])([H])C([H])=C([H])C([H])([H])C([H])=C([H])C([H])([H])C([H])([H])C([H])([H])C([H])([H])C([H])([H])[H])C([H])([H])OP(=O)([O-])OC([H])([H])C([H])([H])[N+](C([H])([H])[H])(C([H])([H])[H])C([H])([H])[H]	CHEBI:76084	7.3414	ChEBI=CHEBI:76084	71768169	LSUXCWJOIAWGOU-FTJOPAKQSA-N	[H]OC([H])([H])C([H])(OC(=O)C([H])([H])C([H])([H])C([H])([H])C([H])([H])C([H])([H])C([H])([H])C([H])([H])C([H])=C([H])C([H])([H])C([H])=C([H])C([H])([H])C([H])([H])C([H])([H])C([H])([H])C([H])([H])[H])C([H])([H])OP(=O)([O-])OC([H])([H])C([H])([H])[N+](C([H])([H])[H])(C([H])([H])[H])C([H])([H])[H]	175.27255 72;177.14848 117;264.31342 12;265.02643 49;283.20874 21;308.82379 122;309.44678 10;332.867 22;342.36646 19;351.92493 22;353.03601 43;358.78882 42;396.96924 54;412.15771 18;415.17157 154;441.01465 12;459.18433 217;466.77521 19;477.13947 11;483.89172 60;485.18829 202;501.78815 21;503.22321 8587;	0.000273589	0.000335024	0.000395123	0.000337413	0.000310464	0.00021117	0.000380732	0.000488661	0.000387185	0.000453605	0.000577646	0.000474447	0.000512071	0.000290563	0.000444284	0.000409374	0.00037784	0.000400773	0.000424419	0.000393194	0.000331676	0.000376165	0.000294193	0.000388521	0.000350502	0.000272394	0.000272942	0.000285892	0.000252243	0.000184219	0.000325904	0.000306012	0.000251837
13_HilicNeg	12.04	149.061	[M-H]-	CHEBI:82367	7.5463	ChEBI=CHEBI:82367,STOFF=SI00005773	31217	FQYUMYWMJTYZTK-UHFFFAOYNA-N	[H]C2=C([H])C([H])=C(OC([H])([H])C1([H])(OC1([H])([H])))C([H])=C2([H])	4'-Methoxyacetophenone	7.4804	FooDB=FDB010502,HMDB=HMDB32570,UNPD=UNPD143444,STOFF=SI00006720	7476	NTPLXRHDUXRPNE-UHFFFAOYSA-N	[H]C=1C([H])=C(C([H])=C([H])C=1(OC([H])([H])[H]))C(=O)C([H])([H])[H]	122.38458 27;	0.00138955	0.00149961	0.00156792	0.0021609	0.00104266	0.000714524	0.00160417	0.00158916	0	0.00194927	0.00168285	0.00158018	0.000661109	0.00370961	0.000418028	0.00147846	0.000653923	0.000584276	9.28913e-05	0	0.00198471	0	0.0210582	0.00212611	0.000926317	0.00171375	0.00113759	0.000649191	0.00290306	0.00328781	0.00104881	0.00274605	0.00112452
346_RPPOS	17.74	482.324	[M+H]+	HMDB10381	7.5379	BMDB=BMDB10381,FooDB=FDB027532,HMDB=HMDB10381,UNPD=UNPD24711	24779458	RJZVWDTYEWCUAR-JOCHJYFZSA-N	[H]OC([H])(C([H])([H])OC(=O)C([H])([H])C([H])([H])C([H])([H])C([H])([H])C([H])([H])C([H])([H])C([H])([H])C([H])([H])C([H])([H])C([H])([H])C([H])([H])C([H])([H])C([H])([H])C([H])([H])[H])C([H])([H])OP(=O)([O-])OC([H])([H])C([H])([H])[N+](C([H])([H])[H])(C([H])([H])[H])C([H])([H])[H]	HMDB11130	7.3	BMDB=BMDB11130,ChEBI=CHEBI:83047; CHEBI:75036,FooDB=FDB027909,HMDB=HMDB11130,YMDB=YMDB01204	9547068	BBYWOYAFBUOUFP-JOCHJYFZSA-N	[H]OC([H])(C([H])([H])OC(=O)C([H])([H])C([H])([H])C([H])([H])C([H])([H])C([H])([H])C([H])([H])C([H])([H])C([H])([H])C([H])([H])C([H])([H])C([H])([H])C([H])([H])C([H])([H])C([H])([H])C([H])([H])C([H])([H])C([H])([H])[H])C([H])([H])OP(=O)(O[H])OC([H])([H])C([H])([H])N([H])[H]	140.18126 10;159.39635 10;184.11722 3544;185.01022 24;258.33853 32;282.93747 52;283.54828 16;296.02692 23;299.34204 23;304.68585 17;352.2215 28;355.14362 17;370.8064 17;381.75656 27;390.10797 28;398.8168 15;400.16595 19;405.28009 26;413.52945 11;419.22925 14;422.884 25;426.06943 42;444.0715 14;446.09985 62;450.35086 13;453.89017 28;454.56116 12;458.13815 15;459.15295 23;464.27399 10632;464.92474 …	0.00030896	0.000294617	0.000362146	0.000152277	0.000264042	0.00020221	0.000314925	0.000269277	0.000470283	0.000277478	0.000296257	0.000239968	0.00044185	0.000526576	0.00031519	0.000573083	0.000495832	0.000355733	0.000228861	0.000439357	0.000489773	0.000725726	0.000527743	0.000459881	0.000254624	0.000384385	0.000324881	0.000221596	0.000336723	0.000305032	0.000524662	0.000671713	0.000360902
39_HilicPos	5.53	133.071	[M+H]+	Ethyl (R)-3-hydroxybutyrate	7.5093	ChEBI=CHEBI:28707,FooDB=FDB009392,HMDB=HMDB40409,KNApSAcK=C00050444,UNPD=UNPD186405,YMDB=YMDB01425	440030	OMSUIQOIVADKIM-RXMQYKEDSA-N	[H]OC([H])(C([H])([H])[H])C([H])([H])C(=O)OC([H])([H])C([H])([H])[H]	77877-35-1	7.5077	BMDB=BMDB10718,ChEBI=CHEBI:20070; CHEBI:37035; CHEBI:37049,FooDB=FDB027868,HMDB=HMDB10718,SMPDB=PW_C006726	10197713	HPMGFDVTYHWBAG-RXMQYKEDSA-N	[H]OC(=O)C([H])([H])C([H])(O[H])C([H])([H])C([H])([H])C([H])([H])[H]	54.83909 12;87.09746 43;88.96335 2135;90.99702 12;104.97054 152;	0.00121209	0.0012563	0.0010684	0.00110811	0.00109156	0.0011561	0.000942705	0.000872434	0	0.000957405	0.00108087	0.0011948	0.00115135	0.000759429	0.000860155	0.000966436	0.0010017	0.000872939	0.00111027	0	0.000827394	0.000878253	0	0.000784367	0.000960422	0.000914336	0.000729071	0.000779329	0.000621811	0.00069967	0.000796645	0.000680208	0.000820289
70_HilicPos	11.88	165.076	[M+H]+	L-fucopyranose	7.5055	BMDB=BMDB00174; BMDB00849; BMDB03081,ChEBI=CHEBI:2181; CHEBI:27442; CHEBI:27586; CHEBI:27907; CHEBI:42589; CHEBI:42606; CHEBI:2179; CHEBI:42548; CHEBI:42564; CHEBI:62346; CHEBI:63151; CHEBI:63152,DrugBank=DB04062; DB03283; DB04473; DB03485; DB03773,ECMDB=ECMDB00849; ECMDB00174; ECMDB20264,FooDB=FDB023106,HMDB=HMDB00174; HMDB00849; HMDB03081; HMDB29196; HMDB59625,KNApSAcK=C00001118; C00001128,Plan…	17106	SHZGCJCMOBCMKK-DHVFOXMCSA-N	[H]OC1([H])(OC([H])(C([H])([H])[H])C([H])(O[H])C([H])(O[H])C1([H])(O[H]))	4-DEOXY-ALPHA-D-GLUCOSE	7.2558	DrugBank=DB02670,PubChem=447629	447629	HDEMQQHXNOJATE-UNTFVMJOSA-N	[H]OC([H])([H])C1([H])(OC([H])(O[H])C([H])(O[H])C([H])(O[H])C1([H])([H]))	68.99224 88;87.05839 22;111.11052 26;120.87569 20;129.07977 329;146.82265 309;147.44801 11;	0.00104835	0.000928772	0.000968622	0.00118513	0.00108859	0.000954199	0.000593761	0.000776728	0	0.00098084	0.000964666	0.000734076	0.000481423	0.000358049	6.20922e-05	0.000602573	0.000921031	0.00037259	0	0	0.000151694	0.00026469	0	0.000682657	0.000154066	0.00082804	0.000373872	0.000207521	0.000190002	0.000112316	0.000218669	0.000348243	0.000162247
465_RPPOS	20.49	732.548	[M+H]+	HMDB07872	7.5052	BMDB=BMDB07872,ChEBI=CHEBI:73793,HMDB=HMDB07872,YMDB=YMDB01813	24778618	GMJKBBMXRYZKEP-WYRBGLKBSA-N	[H]C(=C([H])C([H])([H])C([H])([H])C([H])([H])C([H])([H])C([H])([H])C([H])([H])C([H])([H])C([H])([H])C([H])([H])C(=O)OC([H])(C([H])([H])OC(=O)C([H])([H])C([H])([H])C([H])([H])C([H])([H])C([H])([H])C([H])([H])C([H])([H])C([H])([H])C([H])([H])C([H])([H])C([H])([H])C([H])([H])C([H])([H])[H])C([H])([H])OP(=O)([O-])OC([H])([H])C([H])([H])[N+](C([H])([H])[H])(C([H])([H])[H])C([H])([H])[H])C([H])([H])C([…	HMDB07873	7.4746	BMDB=BMDB07873,ChEBI=CHEBI:84808,HMDB=HMDB07873,YMDB=YMDB01814	24778620	NXASLICYTANYBI-OQHNRNOKSA-N	[H]C(=C([H])C([H])([H])C([H])([H])C([H])([H])C([H])([H])C([H])([H])C([H])([H])C([H])([H])C([H])([H])[H])C([H])([H])C([H])([H])C([H])([H])C([H])([H])C([H])([H])C([H])([H])C([H])([H])C(=O)OC([H])(C([H])([H])OC(=O)C([H])([H])C([H])([H])C([H])([H])C([H])([H])C([H])([H])C([H])([H])C([H])([H])C([H])([H])C([H])([H])C([H])([H])C([H])([H])C([H])([H])C([H])([H])[H])C([H])([H])OP(=O)([O-])OC([H])([H])C([H])…	213.12938 15;218.89359 64;220.44223 166;221.21628 521;223.17184 219;239.18175 143;245.14232 40;261.72784 12;263.0556 47;264.40488 181;265.16663 1012;267.15234 320;283.15448 423;300.16205 13;304.09052 23;306.98737 18;308.31741 65;309.07721 1332;311.0499 182;317.13727 16;327.24625 500;352.98965 1156;354.93567 110;371.20416 521;379.56781 16;383.23114 13;395.03418 28;396.43317 127;397.06934 604;415.1…	0.00200083	0.0017458	0.0020097	0.00288712	0.00212801	0.0019966	0.00113483	0.0016635	0.0031917	0.00264454	0.00218937	0.00249606	0.00216253	0.00174944	0.000824804	0.00116174	0.00242931	0.000924236	0.00243611	0.00314904	0.00145603	0.00201595	0.00155774	0.00231861	0.0019332	0.00220702	0.0018599	0.000758397	0.00160526	0.00150214	0.00118015	0.000531807	0.00142238
301_HilicPos	5.8	762.532	[M+H]+	1-Palmitoyl-2-oleoylphosphatidylserine	7.4927	BMDB=BMDB12357,ChEBI=CHEBI:34086; CHEBI:75029,HMDB=HMDB12357,YMDB=YMDB01253	5283499	OIWCYIUQAVBPGV-DAQGAKHBSA-N	[H]OC(=O)C([H])(N([H])[H])C([H])([H])OP(=O)(O[H])OC([H])([H])C([H])(OC(=O)C([H])([H])C([H])([H])C([H])([H])C([H])([H])C([H])([H])C([H])([H])C([H])([H])C([H])=C([H])C([H])([H])C([H])([H])C([H])([H])C([H])([H])C([H])([H])C([H])([H])C([H])([H])C([H])([H])[H])C([H])([H])OC(=O)C([H])([H])C([H])([H])C([H])([H])C([H])([H])C([H])([H])C([H])([H])C([H])([H])C([H])([H])C([H])([H])C([H])([H])C([H])([H])C([H]…	Phosphatidylserine(34:1)	7.457	BMDB=BMDB12387,ChEBI=CHEBI:75106; CHEBI:74909,HMDB=HMDB12387	52926066	ILJAXXNZNFOOQA-DAQGAKHBSA-N	[H]OC(=O)C([H])(N([H])[H])C([H])([H])OP(=O)(O[H])OC([H])([H])C([H])(OC(=O)C([H])([H])C([H])([H])C([H])([H])C([H])([H])C([H])([H])C([H])([H])C([H])([H])C([H])([H])C([H])([H])C([H])([H])C([H])([H])C([H])([H])C([H])([H])C([H])([H])C([H])([H])[H])C([H])([H])OC(=O)C([H])([H])C([H])([H])C([H])([H])C([H])([H])C([H])([H])C([H])([H])C([H])([H])C([H])=C([H])C([H])([H])C([H])([H])C([H])([H])C([H])([H])C([H]…	279.36249 25;283.02649 25;327.32547 25;352.47644 29;371.07593 48;392.68512 17;430.72034 11;459.00378 43;462.2558 15;463.14301 15;477.72516 13;521.13684 23;536.22913 14;547.21222 76;549.17047 16;577.40472 4406;578.0965 19;591.23413 13;641.24841 15;683.29718 30;690.22137 16;713.65485 28;726.54474 15;743.96661 24;745.02289 23;745.63226 43;	0.000749094	0.000674205	0.000548349	0.000464433	0.000404548	0.000187642	0.000500431	0.00102424	0.00754758	0.000596588	0.000726576	0.000581355	0.000100669	0.000311326	0.000817402	0.000578365	0.000151606	0.000830084	9.40276e-05	0	0.000417045	0.000557771	0	0.00082291	0.0019943	0.0003253	0.00208504	0.00231052	0.0023284	0.00201159	0.000681196	0.00149847	0.00166964
329_RPPOS	16.18	468.309	[M+H]+	CHEBI:84490	7.4821	ChEBI=CHEBI:84490	86583376	RVNBVQKDPQVSOY-OAQYLSRUSA-N	[H]OC([H])(C([H])([H])OC(=O)C([H])([H])C([H])([H])C([H])([H])C([H])([H])C([H])([H])C([H])([H])C([H])([H])C([H])([H])C([H])([H])C([H])([H])C([H])([H])C([H])([H])C([H])([H])C([H])([H])C([H])([H])C([H])([H])[H])C([H])([H])OP(=O)(O[H])OC([H])([H])C([H])([H])N([H])[H]	HMDB10379	6.3891	BMDB=BMDB10379,ChEBI=CHEBI:64489,FooDB=FDB027530,HMDB=HMDB10379,SMPDB=PW_C006388,UNPD=UNPD67678,YMDB=YMDB01175	460604	VXUOFDJKYGDUJI-OAQYLSRUSA-N	[H]OC([H])(C([H])([H])OC(=O)C([H])([H])C([H])([H])C([H])([H])C([H])([H])C([H])([H])C([H])([H])C([H])([H])C([H])([H])C([H])([H])C([H])([H])C([H])([H])C([H])([H])C([H])([H])[H])C([H])([H])OP(=O)([O-])OC([H])([H])C([H])([H])[N+](C([H])([H])[H])(C([H])([H])[H])C([H])([H])[H]	179.33803 25;184.15009 6915;184.99838 14;189.25156 12;207.3042 12;209.17967 10;237.32349 21;239.39792 31;240.16745 27;258.1554 61;259.78619 12;264.22256 12;264.85626 10;279.4024 36;283.00107 19;285.16553 42;307.01578 10;327.08237 18;348.14606 13;350.31415 21;354.64777 11;365.37582 14;368.3266 28;369.48138 14;375.84848 24;382.25168 26;387.82953 43;390.97684 35;395.41702 18;431.2272 16;432.02216 47…	0	0	0	0	0	0	0.000264444	0	0.000195207	0	8.3568e-05	0	0.000251553	0.000314388	0	0.000306159	0.000364758	0	0.000181742	0.000164882	0.000397891	0.000605167	0.000416909	0.000335771	3.60338e-05	0.000391863	0.000400525	0.000286437	0.000487743	0.000436384	0.000546294	0.000781503	0.000423368
112_RPPOS	1.76	204.123	[M+H]+	HMDB00201	7.463	BMDB=BMDB00201,ChEBI=CHEBI:73024; CHEBI:15960; CHEBI:57589,DrugBank=DB08842,FooDB=FDB021904,HMDB=HMDB00201,PubChem=439756; 7045767; 18230; 1,SMPDB=PW_C000129,UNPD=UNPD80983,YMDB=YMDB00351; YMDB00617	439756	RDHQFKQIGNGIED-UHFFFAOYNA-N	[H]C([H])([H])C(=O)OC([H])(C([H])([H])C(=O)[O-])C([H])([H])[N+](C([H])([H])[H])(C([H])([H])[H])C([H])([H])[H]	DB07989	6.2357	DrugBank=DB07989,PubChem=5288636	5288636	OVUHENJPIUQHLJ-MRVPVSSYSA-N	[H]ON(C(=O)C([H])([H])[H])C([H])(C(=O)OC([H])([H])[H])C([H])([H])C([H])(C([H])([H])[H])C([H])([H])[H]	60.67127 350;85.43016 3962;95.35614 22;110.53223 12;122.53362 21;126.33525 14;128.05496 24;130.48091 50;132.36188 16;134.32114 222;137.15709 13;138.29523 19;139.56734 15;142.63162 23;144.52715 558;145.20938 1539;168.16679 48;169.10649 25;172.31154 15;176.05551 11;186.13751 348;187.07875 262;	0	0	0	0.000202441	6.3981e-05	0.000117465	4.85779e-05	0.000106304	0	4.1179e-05	3.82869e-05	2.86264e-05	0.000417101	0.000276837	0	0.000159617	0.000268633	0.000140487	0.000360955	0.000173612	0.0001707	0	0.000206643	0	5.49369e-05	0.000156078	6.0802e-05	0.000216272	8.97065e-05	0.000113613	0.000268182	0.000297278	0.000314764
347_RPPOS	21.09	482.324	[M+H]+	HMDB11130	7.4544	BMDB=BMDB11130,ChEBI=CHEBI:83047; CHEBI:75036,FooDB=FDB027909,HMDB=HMDB11130,YMDB=YMDB01204	9547068	BBYWOYAFBUOUFP-JOCHJYFZSA-N	[H]OC([H])(C([H])([H])OC(=O)C([H])([H])C([H])([H])C([H])([H])C([H])([H])C([H])([H])C([H])([H])C([H])([H])C([H])([H])C([H])([H])C([H])([H])C([H])([H])C([H])([H])C([H])([H])C([H])([H])C([H])([H])C([H])([H])C([H])([H])[H])C([H])([H])OP(=O)(O[H])OC([H])([H])C([H])([H])N([H])[H]	HMDB10381	6.0791	BMDB=BMDB10381,FooDB=FDB027532,HMDB=HMDB10381,UNPD=UNPD24711	24779458	RJZVWDTYEWCUAR-JOCHJYFZSA-N	[H]OC([H])(C([H])([H])OC(=O)C([H])([H])C([H])([H])C([H])([H])C([H])([H])C([H])([H])C([H])([H])C([H])([H])C([H])([H])C([H])([H])C([H])([H])C([H])([H])C([H])([H])C([H])([H])C([H])([H])[H])C([H])([H])OP(=O)([O-])OC([H])([H])C([H])([H])[N+](C([H])([H])[H])(C([H])([H])[H])C([H])([H])[H]	198.20479 47;216.29727 25;234.48363 14;251.00824 26;270.13644 58;271.27591 24;283.23621 172;310.37708 90;315.09158 17;328.84225 32;341.32806 5233;343.14343 12;357.151 33;359.24216 12;397.31479 18;402.91669 12;408.00845 15;408.92264 22;411.48264 16;413.26736 31;418.53024 16;421.07578 405;444.67764 33;464.04587 6115;465.19583 2387;	0.000871337	0.000728037	0.000729504	0.000594452	0.000658548	0.000369408	0.00172209	0.00132151	0.00165189	0.00110517	0.00126758	0.00103915	0.00129294	0.0015201	0.00178654	0.00240256	0.00149642	0.00274751	0.000976978	0.00111745	0.00176145	0.00141297	0.00199718	0.00132898	0.00107949	0.00251876	0.00180606	0.00187773	0.00165687	0.00190942	0.00180654	0.00269905	0.00165007
330_RPPOS	16.61	468.308	[M+H]+	CHEBI:84490	7.4451	ChEBI=CHEBI:84490	86583376	RVNBVQKDPQVSOY-OAQYLSRUSA-N	[H]OC([H])(C([H])([H])OC(=O)C([H])([H])C([H])([H])C([H])([H])C([H])([H])C([H])([H])C([H])([H])C([H])([H])C([H])([H])C([H])([H])C([H])([H])C([H])([H])C([H])([H])C([H])([H])C([H])([H])C([H])([H])C([H])([H])[H])C([H])([H])OP(=O)(O[H])OC([H])([H])C([H])([H])N([H])[H]	HMDB10379	6.3701	BMDB=BMDB10379,ChEBI=CHEBI:64489,FooDB=FDB027530,HMDB=HMDB10379,SMPDB=PW_C006388,UNPD=UNPD67678,YMDB=YMDB01175	460604	VXUOFDJKYGDUJI-OAQYLSRUSA-N	[H]OC([H])(C([H])([H])OC(=O)C([H])([H])C([H])([H])C([H])([H])C([H])([H])C([H])([H])C([H])([H])C([H])([H])C([H])([H])C([H])([H])C([H])([H])C([H])([H])C([H])([H])C([H])([H])[H])C([H])([H])OP(=O)([O-])OC([H])([H])C([H])([H])[N+](C([H])([H])[H])(C([H])([H])[H])C([H])([H])[H]	147.49582 17;184.16356 6079;222.34291 26;258.26645 93;283.12274 50;285.29398 88;294.67419 11;298.15527 17;299.90561 16;332.50296 14;335.86353 27;339.13629 11;359.79453 57;361.94156 14;375.67313 37;379.28781 19;381.42764 20;382.86649 19;383.61563 20;385.2709 18;387.41049 13;391.13895 56;393.88538 12;396.16422 25;407.08514 15;408.23312 19;410.58829 47;430.06671 13;431.85132 79;433.07706 125;444.975…	0.000744511	0.000604057	0.000881156	0.000425858	0.000635397	0.0005214	0.00135455	0.000709952	0.00124494	0.000876078	0.000761868	0.000635109	0.0017075	0.00208716	0.00108784	0.00221986	0.00202266	0.000953904	0.00136985	0.000967537	0.00189291	0.00300555	0.00255341	0.00217699	0.00136563	0.00257038	0.0017791	0.00160859	0.00267059	0.00228382	0.00368042	0.00388989	0.00271244
804_RPNEG	8.92	359.134	[M-H]-	HMDB37028	7.4243	ChEBI=CHEBI:2260; CHEBI:2314; CHEBI:76844,FooDB=FDB016009,HMDB=HMDB37028,KNApSAcK=C00036651; C00010537; C00036663,PlantCyc=CPD-9981,PubChem=443322,UNPD=UNPD89938; UNPD195578; UNPD165790; UNPD57259; UNPD78944	443322	DSXFHNSGLYXPNG-YDYVGBNJSA-N	[H]OC(=O)C2=C([H])OC([H])(OC1([H])(OC([H])(C([H])([H])O[H])C([H])(O[H])C([H])(O[H])C1([H])(O[H])))C3([H])(C2([H])C([H])([H])C([H])([H])C3([H])(C([H])([H])[H]))	C00036555	7.3852	ChEBI=CHEBI:81319,KNApSAcK=C00036555,PlantCyc=CPD-8757,UNPD=UNPD183779	25245128	SBHOSQZNRDXQAX-WSESCXGKSA-N	[H]OC(=O)C2=C([H])C(=C([H])C([H])=NC([H])([H])C([H])([H])C1=C([H])C([H])=C(O[H])C(OC([H])([H])[H])=C1([H]))C([H])([H])C([H])(C(=O)O[H])N2([H])	101.28795 13;105.28786 30;139.25859 17;149.25446 4402;161.40857 12;163.25156 324;167.21634 12;171.39455 11;179.8136 11;187.51015 17;207.59894 10;209.25308 19;214.32843 15;241.34567 14;244.02026 11;271.1618 18;274.24329 20;283.20975 18;285.35919 27;299.45502 12;320.63959 17;322.82928 45;339.14758 28;341.20459 57;	0	0	0	0	0	0	0.00173848	0	0.00104691	0.00117262	0.00118905	0.00113442	0.00154818	0.00195735	0.00156579	0.00158141	0.00121568	0.0013402	0.00124964	0.00155261	0.00188691	0.00152126	0.00165188	0.00154746	0.0012032	0.00140258	0.00149156	0.0013318	0.00181625	0.00170398	0.00167421	0.00174805	0.000965679
1275_RPNEG	17.93	500.277	[M-H]-	HMDB11488	7.4184	BMDB=BMDB11488,ChEBI=CHEBI:72746,FooDB=FDB028204,HMDB=HMDB11488	53480937	BAKUYTLDCVITBO-YSKCIPFOSA-N	[H]OC([H])([H])C([H])(OC(=O)C([H])([H])C([H])([H])C([H])([H])C([H])([H])C([H])([H])C([H])([H])C([H])=C([H])C([H])([H])C([H])=C([H])C([H])([H])C([H])=C([H])C([H])([H])C([H])=C([H])C([H])([H])C([H])([H])[H])C([H])([H])OP(=O)(O[H])OC([H])([H])C([H])([H])N([H])[H]	HMDB11518	7.4184	BMDB=BMDB11518,ChEBI=CHEBI:72742,FooDB=FDB028234,HMDB=HMDB11518	53480952	JPNPIRVRGLGTRE-YSKCIPFOSA-N	[H]OC([H])(C([H])([H])OC(=O)C([H])([H])C([H])([H])C([H])([H])C([H])([H])C([H])([H])C([H])([H])C([H])=C([H])C([H])([H])C([H])=C([H])C([H])([H])C([H])=C([H])C([H])([H])C([H])=C([H])C([H])([H])C([H])([H])[H])C([H])([H])OP(=O)(O[H])OC([H])([H])C([H])([H])N([H])[H]	153.36836 27;162.9585 11;177.33273 22;191.36203 28;196.15753 407;205.24611 389;214.21832 274;219.64241 14;259.323 1884;267.45258 12;275.74176 36;285.23727 50;301.43182 137;303.24243 16226;304.13229 39;416.63596 14;439.10733 18;440.28433 13;480.28409 18;481.01132 10;	0.00330717	0.00297367	0.00245308	0.002412	0.00229242	0.000316198	0.00169153	0.00490147	0.00304311	0.00269971	0.00323094	0.00269192	0.00212397	0.00300561	0.00241081	0.00376551	0.00297149	0.00365128	0.00274924	0.00301868	0.0032234	0.00308341	0.00335939	0.00377137	0.00301563	0.00690439	0.00519058	0.00742994	0.00374862	0.0048543	0.00616513	0.00582835	0.00780501
112_RPNEG	10.08	201.113	[M-H]-	Decanedioic acid	7.4173	BMDB=BMDB00792,ChEBI=CHEBI:41865; CHEBI:76283,DrugBank=DB07645,HMDB=HMDB00792,KNApSAcK=C00001202,PubChem=5192,T3DB=T3D4883,UNPD=UNPD70014,STOFF=SI00001110	5192	CXMXRPHRNRROMY-UHFFFAOYSA-N	[H]OC(=O)C([H])([H])C([H])([H])C([H])([H])C([H])([H])C([H])([H])C([H])([H])C([H])([H])C([H])([H])C(=O)O[H]	Propanedioic acid, heptyl-	7.3491	ChEBI=CHEBI:70747,HMDB=HMDB59719	136574	YSFZWUJOBANROZ-UHFFFAOYSA-N	[H]OC(=O)C([H])(C(=O)O[H])C([H])([H])C([H])([H])C([H])([H])C([H])([H])C([H])([H])C([H])([H])C([H])([H])[H]	69.41872 18;137.32649 14;139.29533 1309;139.95851 19;173.27208 12;183.27435 235;	0.00178021	0.00222218	0.0022029	0.00196652	0.00167404	0.000198414	0.00286665	0.00324546	0.00260336	0.00206828	0.00238958	0.00244681	0.00325273	0.00264362	0.0024669	0.0045866	0.0043779	0.00470462	0.00237699	0.00306054	0.00330519	0.00349942	0.00323192	0.00289116	0.00189461	0.00287268	0.00239144	0.0031511	0.00210952	0.00192931	0.00311701	0.00261367	0.00319221
106_RPPOS	2.04	198.053	[M+H]+	5-Phosphononorvaline	7.3998	ChEBI=CHEBI:138644	1216	VOROEQBFPPIACJ-UHFFFAOYNA-N	[H]OC(=O)C([H])(N([H])[H])C([H])([H])C([H])([H])C([H])([H])P(=O)(O[H])O[H]	CPD-10450	6.8589	ChEBI=CHEBI:19452,PlantCyc=CPD-10450,PubChem=37182	37182	IEEJAAUSLQCGJH-UHFFFAOYSA-N	[H]C1=C(C(=C(C([H])=C1[N+](=O)[O-])[N+](=O)[O-])C([H])([H])[H])N([H])[H]	86.25058 22;97.57341 15;112.31052 21;113.4989 12;120.94521 37;124.58287 19;135.28532 21;139.4539 11;140.21413 29;156.96159 62;157.61781 17;166.17545 35;170.19615 15;181.13277 7770;	0.000123432	0.000106457	0.000280954	0.000224012	0.000170859	0.000119439	0.000259729	8.62858e-05	0.000223176	0.0003128	0.000134714	0.000238118	0.000761968	0.00079639	0.0010782	0.000345855	0.000344891	0.000256341	0.00132918	0.000309589	0.00148153	0.00119607	0.000456306	0.000547665	5.96686e-05	0.000129256	3.6517e-05	3.72857e-05	0.000376983	0.000176308	0.000117817	7.19208e-05	4.19466e-05
370_RPPOS	18.28	508.34	[M+H]+	HMDB11512	7.3979	BMDB=BMDB11512,FooDB=FDB028228,HMDB=HMDB11512	52925139	JEAGLCKGAKACCE-OPSAWKISSA-N	[H]OC([H])(C([H])([H])OC(=O)C([H])([H])C([H])([H])C([H])([H])C([H])([H])C([H])([H])C([H])([H])C([H])([H])C([H])([H])C([H])([H])C([H])=C([H])C([H])([H])C([H])([H])C([H])([H])C([H])([H])C([H])([H])C([H])([H])C([H])([H])C([H])([H])[H])C([H])([H])OP(=O)(O[H])OC([H])([H])C([H])([H])N([H])[H]	HMDB11482	6.6195	BMDB=BMDB11482,FooDB=FDB028198,HMDB=HMDB11482	53480931	DGAUETYRWFLGRT-OPSAWKISSA-N	[H]OC([H])([H])C([H])(OC(=O)C([H])([H])C([H])([H])C([H])([H])C([H])([H])C([H])([H])C([H])([H])C([H])([H])C([H])([H])C([H])([H])C([H])=C([H])C([H])([H])C([H])([H])C([H])([H])C([H])([H])C([H])([H])C([H])([H])C([H])([H])C([H])([H])[H])C([H])([H])OP(=O)(O[H])OC([H])([H])C([H])([H])N([H])[H]	184.09425 3026;220.24585 17;271.23096 21;274.94702 15;276.31506 26;279.30865 17;325.36319 86;348.80106 35;352.78461 15;378.08121 27;407.80881 13;415.78073 11;422.92825 35;423.70596 11;427.25412 19;428.19998 18;431.20389 63;435.04855 14;435.86746 12;446.40085 14;448.45953 14;450.75302 15;469.48831 13;472.08527 20;472.74588 32;490.24408 9102;491.05167 149;507.27121 15;	0.000254386	0.00020849	0.000241623	0	0.000173266	0.000161832	0.000372915	0.000241998	0.00044814	0.000235158	0.000235481	0.0001421	0.000445427	0.00059569	0.000365865	0.00055973	0.00063613	0.000285697	0.00025414	0.000279742	0.000480946	0.000957274	0.00056485	0.000561849	0.000235812	0.000409579	0.000404354	0.000228032	0.000419437	0.000350372	0.000533789	0.000604144	0.000454468
1196_RPNEG	12.93	449.149	[M-H]-	CHEBI:66204	7.3888	ChEBI=CHEBI:66204,UNPD=UNPD45439	16091520	GTYGWPXLHJZXDF-MIUGBVLSSA-N	[H]OC1=C([H])C([H])=C(C([H])=C1([H]))C([H])([H])C(=O)OC3([H])(C([H])(OC([H])([H])C([H])([H])C=2C([H])=C([H])C(O[H])=C(O[H])C=2([H]))OC([H])(C([H])([H])O[H])C([H])(O[H])C3([H])(O[H]))	CHEBI:2515	7.2597	ChEBI=CHEBI:2515,UNPD=UNPD79515	53297353	AJNRZGCOXRHMEZ-ZDRHXKJUSA-N	[H]OC1=C([H])C([H])=C(C([H])=C1([H]))C(=O)OC([H])([H])C3=C([H])C([H])([H])C4([H])(C([H])=C([H])OC([H])(OC2([H])(OC([H])(C([H])([H])O[H])C([H])(O[H])C([H])(O[H])C2([H])(O[H])))C34([H]))	149.19725 294;163.3186 116;179.18643 472;180.88638 17;205.23442 194;213.30714 33;225.09721 21;243.0459 8281;244.0737 61;257.39124 45;285.17838 2074;305.17139 13;332.89224 13;355.17221 12348;356.21786 173;365.01065 32;367.35663 28;368.68073 12;385.13925 85610;386.23691 286;389.20001 58;419.10739 527;428.86047 52;431.08072 3567;431.76349 31;432.53653 33;	0.017363	0.0118852	0.0156365	0.0184426	0.0161317	0.0173313	0.0763649	0.020836	0.0298383	0.0277668	0.0152354	0.00898844	0.0821517	0.105003	0.106536	0.0776228	0.0292569	0.0424244	0.0120138	0.0588481	0.0791713	0.0853593	0.0643257	0.0284463	0.00933467	0.0305893	0.0230331	0.00405803	0.0440049	0.0271784	0.027915	0.0582094	0.00666995
308_RPPOS	13.18	451.164	[M+H]+	CHEBI:2515	7.3531	ChEBI=CHEBI:2515,UNPD=UNPD79515	53297353	AJNRZGCOXRHMEZ-ZDRHXKJUSA-N	[H]OC1=C([H])C([H])=C(C([H])=C1([H]))C(=O)OC([H])([H])C3=C([H])C([H])([H])C4([H])(C([H])=C([H])OC([H])(OC2([H])(OC([H])(C([H])([H])O[H])C([H])(O[H])C([H])(O[H])C2([H])(O[H])))C34([H]))	CHEBI:66207	6.4803	ChEBI=CHEBI:66207,UNPD=UNPD194058	16091523	KCKBTWNNYSDHSE-MIUGBVLSSA-N	[H]OC1=C([H])C([H])=C(C([H])=C1([H]))C([H])([H])C([H])([H])OC3([H])(OC([H])(C([H])([H])O[H])C([H])(O[H])C([H])(O[H])C3([H])(OC(=O)C([H])([H])C2=C([H])C([H])=C(O[H])C(O[H])=C2([H])))	174.99442 14;192.23666 14;203.27107 15;207.37848 16;217.28368 17;219.12799 21;220.10236 14;221.46338 33;222.2964 18;237.71375 21;248.12689 10;261.97604 11;263.03845 18;264.92105 40;267.01926 13;277.1181 14;279.25296 49;289.55969 27;293.27051 56;295.03824 20;311.27759 21;313.57098 19;317.02356 11;331.02679 419;335.08167 12;336.36746 41;337.24103 15;339.00006 164;348.8172 11;350.84698 14;353.1839 2…	0.000473351	0.000279975	0.000381366	0.000567317	0.000398003	0.000288004	0.000971877	0.000443605	0.00046181	0.000954863	0.000553525	0.000244557	0.0049721	0.00526884	0.00451908	0.00309463	0.00209385	0.00147636	0.00428452	0.000556006	0.00256401	0.00505672	0.00522775	0.00444759	0.000375635	0.000526017	0.00117454	4.5141e-05	0.00205032	0.00115073	0.000994578	0.000235709	0.00247345
235_RPPOS	18.87	356.28	[M+H]+	CHEBI:73053	7.3327	ChEBI=CHEBI:73053	71464533	UKLXKBLKKAOIKL-QXMHVHEDNA-N	[H]C(=C([H])C([H])([H])C([H])([H])C([H])([H])C([H])([H])C([H])([H])C([H])([H])C([H])([H])[H])C([H])([H])C([H])([H])C([H])([H])C(=O)OC([H])(C([H])([H])C([H])([H])C(=O)[O-])[N+](C([H])([H])[H])(C([H])([H])[H])C([H])([H])[H]							170.13652 33;227.18631 89;338.88226 83;	0.000309811	0	0	0	6.19621e-05	0	0	0	0.000125576	0	0	0.000143132	0	0	0	0	0	0	0	0	0	0	0	0	0	0.000152045	0	0	0	9.18529e-05	0	0	0
312_RPPOS	17.38	452.277	[M+H]+	HMDB11504	7.3271	BMDB=BMDB11504,FooDB=FDB028220,HMDB=HMDB11504,YMDB=YMDB01201	90657370	DSOWUEHXZJUNID-WHXUGTBJSA-N	[H]OC([H])(C([H])([H])OC(=O)C([H])([H])C([H])([H])C([H])([H])C([H])([H])C([H])([H])C([H])([H])C([H])([H])C([H])=C([H])C([H])([H])C([H])([H])C([H])([H])C([H])([H])C([H])([H])C([H])([H])[H])C([H])([H])OP(=O)(O[H])OC([H])([H])C([H])([H])N([H])[H]	HMDB11474	7.2913	BMDB=BMDB11474,FooDB=FDB028190,HMDB=HMDB11474	53480923	MAFRHGZTIOAXEL-WHXUGTBJSA-N	[H]OC([H])([H])C([H])(OC(=O)C([H])([H])C([H])([H])C([H])([H])C([H])([H])C([H])([H])C([H])([H])C([H])([H])C([H])=C([H])C([H])([H])C([H])([H])C([H])([H])C([H])([H])C([H])([H])C([H])([H])[H])C([H])([H])OP(=O)(O[H])OC([H])([H])C([H])([H])N([H])[H]	145.41879 21;176.03911 13;212.67529 15;220.74426 10;227.25189 16;237.28885 31;239.34506 20;251.13797 16;269.04755 24;279.31436 13;280.42163 19;308.56445 17;311.24146 1815;317.27191 15;330.9422 13;351.13501 18;353.44626 14;356.8186 18;371.11301 23;374.32153 10;377.50916 35;380.08859 106;389.45578 21;390.99106 165;392.44876 18;396.55301 10;414.51993 20;416.01221 418;433.24448 197;434.07822 2667;434…	0.000226027	0	0	3.57978e-05	7.82811e-05	0.00012958	0.000252303	0	0.000176306	0.000179155	0.000274264	0	0.000203204	0.000383432	0.00020579	0.000271958	0.000322934	0.000238705	0.00015772	0.0001496	0.000374342	0.000355881	0.000411308	0.000260938	0.000288074	0.000461962	0.000605839	0.000469791	0.000531	0.000563055	0.000626348	0.000697261	0.000515177
8_HilicNeg	20.57	130.051	[M-H]-	N-Acetyl-beta-alanine	7.3251	ChEBI=CHEBI:16682; CHEBI:57857,PubChem=76406	76406	LJLLAWRMBZNPMO-UHFFFAOYSA-N	[H]OC(=O)C([H])([H])C([H])([H])N([H])C(=O)C([H])([H])[H]	(2S,4R)-4-hydroxypyrrolidinium-2-carboxylate	7.2139	BMDB=BMDB00725; BMDB06055,ChEBI=CHEBI:18095; CHEBI:16231; CHEBI:18240; CHEBI:28397; CHEBI:20392; CHEBI:57690; CHEBI:58375; CHEBI:62978; CHEBI:62981,DrugBank=DB08847,ECMDB=ECMDB00725,FooDB=FDB013511,HMDB=HMDB00725; HMDB06055; HMDB36576; HMDB60460,KNApSAcK=C00001370,PlantCyc=4-HYDROXY-L-PROLINE,PubChem=5810; 69248; 6971279; 21353534,SMPDB=PW_C002643,T3DB=T3D4413,UNPD=UNPD125295; UNPD167091,YMDB=YMD…	5810	PMMYEEVYMWASQN-DMTCNVIQSA-N	[H]OC(=O)C1([H])(N([H])C([H])([H])C([H])(O[H])C1([H])([H]))	58.71958 13;88.40274 1036;	4.80394e-05	7.50994e-05	0.000104568	0.000134239	0.00011232	9.39723e-05	5.4031e-05	0.000148167	0	0.000348312	0.000134534	4.73839e-05	0.00196296	0.00110951	0.000162279	0.00176823	0.00136647	4.49081e-05	0.00221901	0	0.00262373	0	0	0.000199135	3.72777e-05	0.00445728	0.000106457	0.000288392	0.00292932	0.00218032	0.00369926	0.00243537	0.000120899
1197_RPNEG	13.57	449.149	[M-H]-	CHEBI:66204	7.3205	ChEBI=CHEBI:66204,UNPD=UNPD45439	16091520	GTYGWPXLHJZXDF-MIUGBVLSSA-N	[H]OC1=C([H])C([H])=C(C([H])=C1([H]))C([H])([H])C(=O)OC3([H])(C([H])(OC([H])([H])C([H])([H])C=2C([H])=C([H])C(O[H])=C(O[H])C=2([H]))OC([H])(C([H])([H])O[H])C([H])(O[H])C3([H])(O[H]))	CHEBI:2515	7.1947	ChEBI=CHEBI:2515,UNPD=UNPD79515	53297353	AJNRZGCOXRHMEZ-ZDRHXKJUSA-N	[H]OC1=C([H])C([H])=C(C([H])=C1([H]))C(=O)OC([H])([H])C3=C([H])C([H])([H])C4([H])(C([H])=C([H])OC([H])(OC2([H])(OC([H])(C([H])([H])O[H])C([H])(O[H])C([H])(O[H])C2([H])(O[H])))C34([H]))	149.31245 156;150.32277 22;163.2372 80;179.1637 408;181.08136 51;201.086 28;205.30249 116;213.28598 24;243.03467 8110;244.17175 63;254.30576 29;285.21396 1314;286.37183 21;331.08932 21;345.479 31;349.16345 22;352.09509 10;355.20905 10083;356.02692 51;356.93008 18;365.16965 56;385.16617 72299;386.03461 387;410.93875 31;412.83246 57;413.49365 19;419.10358 482;428.94537 19;430.6442 89;431.2645 2635;	0.0214968	0.0148634	0.0173462	0.020801	0.0192736	0.0218604	0.0709808	0.0249234	0.0308287	0.030809	0.0162317	0.0111988	0.0692749	0.0976632	0.101447	0.0777308	0.0311816	0.0423226	0.0144565	0.056727	0.0754573	0.0802673	0.0623768	0.031406	0.0108272	0.0313999	0.024124	0.00648074	0.0403226	0.0315897	0.0271798	0.0514337	0.00879039
304_RPPOS	14.39	447.202	[M+H]+	CHEBI:66377	7.3189	ChEBI=CHEBI:66377,UNPD=UNPD31599	16723566	JNBMVQUUSKZDNU-FIBYYQDESA-N	[H]C([H])=C1C(=O)OC2([H])(C3([H])(OC3(C([H])([H])[H])(C([H])(OC(=O)C([H])([H])[H])C([H])([H])C([H])=C(C(=O)C([H])([H])C([H])=C(C([H])([H])[H])C([H])([H])C([H])(OC(=O)C([H])([H])[H])C12([H]))C([H])([H])[H])))	C00046221	7.3057	ChEBI=CHEBI:66816; CHEBI:66817,KNApSAcK=C00046221; C00046220,UNPD=UNPD179536; UNPD189510	10388861	VBJCSMQHVABALD-QUJPKXGGSA-N	[H]OC=1C(C(=O)C([H])(C([H])([H])[H])C([H])([H])C([H])([H])[H])=C3OC([H])(C([H])([H])C3(=C2OC(=O)C([H])=C(C=12)C([H])(OC(=O)C([H])([H])[H])C([H])([H])C([H])([H])[H]))C(O[H])(C([H])([H])[H])C([H])([H])[H]	133.36429 24;147.29904 13;193.48209 42;211.93259 20;230.64723 11;232.83075 13;253.24802 18;279.12436 129;293.16205 29;296.90616 168;317.97491 17;342.98108 41;347.3335 15;362.7496 21;365.1528 10;371.39154 11;384.16916 26;387.17935 43;389.30811 77;410.99155 187;423.40829 28;428.88266 3949;429.66385 23;447.14346 12;	0	0	0	0	0	0	0	0	0	0	0	0	0	0	0	0	0	0	0	3.57026e-05	0	3.37257e-05	0	0	0	0	0	0	0	0	0	0	3.33802e-05
80_HilicNeg	7.47	478.294	[M-H]-	1-18:1-lysoPE	7.2994	BMDB=BMDB11506,ChEBI=CHEBI:74971; CHEBI:60287,FooDB=FDB028222,HMDB=HMDB11506,PubChem=25244076,YMDB=YMDB01207	9547071	PYVRVRFVLRNJLY-MZMPXXGTSA-N	[H]OC([H])(C([H])([H])OC(=O)C([H])([H])C([H])([H])C([H])([H])C([H])([H])C([H])([H])C([H])([H])C([H])([H])C([H])=C([H])C([H])([H])C([H])([H])C([H])([H])C([H])([H])C([H])([H])C([H])([H])C([H])([H])C([H])([H])[H])C([H])([H])OP(=O)(O[H])OC([H])([H])C([H])([H])N([H])[H]	2-(9Z)-octadecenoyl-sn-glycero-3-phosphoethanolamine	7.2279	BMDB=BMDB11476,ChEBI=CHEBI:76088,FooDB=FDB028192,HMDB=HMDB11476	53480925	NOVZJYYJYIFXJC-MZMPXXGTSA-N	[H]OC([H])([H])C([H])(OC(=O)C([H])([H])C([H])([H])C([H])([H])C([H])([H])C([H])([H])C([H])([H])C([H])([H])C([H])=C([H])C([H])([H])C([H])([H])C([H])([H])C([H])([H])C([H])([H])C([H])([H])C([H])([H])C([H])([H])[H])C([H])([H])OP(=O)(O[H])OC([H])([H])C([H])([H])N([H])[H]	196.18048 229;214.23238 192;224.38956 20;225.17134 15;242.14737 19;253.35913 661;263.32703 29;272.16623 15;279.53162 76;281.2984 18510;282.40625 99;343.08551 13;355.31082 68;364.3526 34;400.3255 29;408.14862 15;414.6051 14;417.21173 124;434.02686 16;442.49362 23;460.25031 39;	0.00132295	0.00127687	0.00124672	0.000718842	0.0012994	0.000447684	0.0012831	0.0017734	0	0.00149414	0.00162877	0.00127448	0.00134932	0.00174972	0.00204255	0.00211637	0.00155191	0.00253656	0.00112599	0	0.00176889	0	0	0.00239927	0.00191149	0.00250103	0.00281883	0.00271216	0.00185084	0.00251327	0.00306253	0.00249516	0.00195818
147_RPPOS	14.63	255.196	[M+H]+	HMDB35780	7.2902	FooDB=FDB014527,HMDB=HMDB35780,KNApSAcK=C00021552,UNPD=UNPD118803	-1	UMXJEXAFNWMBJX-UHFFFAOYNA-N	[H]OC([H])([H])C1=C([H])C([H])(C([H])([H])[H])C2([H])(C([H])([H])C(C([H])([H])[H])(C([H])([H])[H])C([H])([H])C2([H])(C([H])(O[H])C1([H])C([H])([H])O[H]))	C00030612	7.2151	ChEBI=CHEBI:81212; CHEBI:81214,KNApSAcK=C00030612; C00030615,UNPD=UNPD7419; UNPD189922	10332558	DXLKOOQBJKRNLJ-AZTPNKIGSA-N	[H]OC([H])([H])C1=C([H])C([H])([H])C([H])([H])C(=C([H])[H])C([H])(O[H])C([H])(O[H])C([H])(C([H])([H])C1([H])([H]))C([H])(C([H])([H])[H])C([H])([H])[H]	81.71255 20;85.31516 12;88.3701 11;109.47563 135;113.21779 256;123.4353 47;142.39507 17;163.08104 109;165.01668 18;167.16867 28;177.41507 58;183.23933 12;191.30223 296;194.94661 35;199.18797 14;201.33275 30;219.07121 419;237.1795 2868;237.85913 26;240.98802 22;245.90096 16;	0.000313234	0.000282052	0.000265249	0.000323939	0.000268386	0.000157458	0.000480307	0.000308497	0.000364933	0.000255283	0.000275743	0.000246944	0.00096809	0.000920096	0.000323294	0.000725435	0.00102021	0.000722606	0.000893883	0.000344101	0.00054529	0.000797132	0.000800962	0.000842414	0.000131646	0.000582212	0.000314764	0.000317574	0.000299022	0.000165481	0.0002912	0.000218859	0.00026556
340_RPPOS	6.83	476.306	[M+H]+	HMDB15090	7.2793	ChEBI=CHEBI:7528,DrugBank=DB00955,HMDB=HMDB15090,PubChem=6857423,SMPDB=PW_C009396	6857423	ZBGPYVZLYBDXKO-HILBYHGXSA-N	[H]OC3([H])(C([H])([H])OC([H])(OC2([H])(C([H])(O[H])C([H])(OC1([H])(OC(=C([H])C([H])([H])C1([H])(N([H])[H]))C([H])([H])N([H])[H]))C([H])(N([H])[H])C([H])([H])C2([H])(N([H])C([H])([H])C([H])([H])[H])))C(O[H])(C([H])([H])[H])C3([H])(N([H])C([H])([H])[H]))	MFCD01311715	7.2079	PubChem=441306; 41859; 4460,UNPD=UNPD127342,STOFF=SI00000793	441306	CIDUJQMULVCIBT-MQDUPKMGSA-N	[H]OC1([H])(C([H])(OC([H])([H])C(O[H])(C([H])([H])[H])C1([H])(N([H])C([H])([H])[H]))OC3([H])(C([H])(O[H])C([H])(OC2([H])(OC(=C([H])C([H])([H])C2([H])(N([H])[H]))C([H])([H])N([H])[H]))C([H])(N([H])[H])C([H])([H])C3([H])(N([H])C([H])([H])C([H])([H])[H])))	175.59232 35;177.45526 40;197.51855 14;221.34937 18;264.96762 71;277.34763 13;283.21857 17;308.88428 53;318.67853 25;324.45969 40;327.38184 76;332.2467 16;340.96402 15;353.00244 94;364.1933 18;371.177 112;397.008 20;415.05505 81;416.97375 31;422.70993 11;429.96121 24;439.72607 19;441.06793 80;454.28131 20;459.06339 11387;459.75851 20;	0.000385564	0.000332822	0.00046877	0.000410189	0.000402546	0.000415383	0.000414344	0.000553647	0.000522921	0.000603415	0.000605162	0.000467402	0.000571207	0.000483813	0.000569611	0.000472661	0.000509241	0.000548372	0.000541898	0.000480955	0.000402975	0.000471051	0.000378522	0.000499108	0.000356909	0.000324396	0.000304654	0.000350732	0.000281507	0.000263367	0.000321456	0.000376315	0.000315318
153_RPPOS	1.29	258.11	[M+H]+	5-Oxo-L-prolyl-L-glutamine	7.2549	FooDB=FDB018762,HMDB=HMDB39229,UNPD=UNPD61172; UNPD31323	-1	ILAITOFTZJRIFJ-WDSKDSINSA-N	[H]N=C(O[H])C([H])([H])C([H])([H])C([H])(N=C(O[H])C1([H])(N=C(O[H])C([H])([H])C1([H])([H])))C(=O)O[H]	C00028390	6.5164	ChEBI=CHEBI:31723,KNApSAcK=C00028390,UNPD=UNPD176314	188957	GSEKYIWUAPZIEF-UHFFFAOYSA-N	[H]OC([H])([H])C2=C([H])C=3OC([H])([H])OC=3(C([H])=C2(C=1C([H])=C([H])C([H])=C([H])C=1N([H])C([H])([H])[H]))	81.29208 79;83.39848 114;104.34297 14329;112.37883 12;125.25502 42;141.03923 169;166.2011 12;175.28853 26;176.23569 11;181.16054 12;183.14203 13;184.27025 120;187.32451 16;195.04533 11;197.08604 18;198.95288 1194;200.00793 216;201.00839 876;220.11932 35;221.50755 14;222.20544 17;226.73018 16;240.12854 180;241.14062 12;	0.000454203	0.00029171	0.000171389	0.000222974	0.000289818	0.000308813	0	0.000216876	0.000204418	0.000107231	0.000337705	0.000314646	0.000882143	0.000718615	0.00103195	0.00104629	0.000777827	0	0.000479805	0.00031309	0.000535725	0.000592402	0.000710049	0.000683119	0.000584948	0.000395954	0.000519428	0.000481537	0.000336773	0.00028416	0.000273954	0.000261396	0
58_HilicNeg	18.98	316.116	[M-H]-	HMDB37839	7.2379	FooDB=FDB016990,HMDB=HMDB37839	-1	UCRYORFHYVRBIO-PPNLDZOPSA-N	[H]OC(=O)C([H])(N([H])C([H])([H])C1(O[H])(OC([H])(C([H])([H])O[H])C([H])(O[H])C1([H])(O[H])))C([H])([H])C2=C([H])N=C([H])N2([H])	crinamidine	7.1648	ChEBI=CHEBI:31436,KNApSAcK=C00024382,UNPD=UNPD100058; UNPD126275	399204	HHEOZJCKMANJQV-CUQLUGJVSA-N	[H]OC3([H])(C([H])([H])C5([H])(N2C([H])([H])C=1C(OC([H])([H])[H])=C6OC([H])([H])OC6(=C([H])C=1C5(C([H])([H])C2([H])([H]))(C4([H])(OC34([H]))))))	196.38831 21;242.06119 13532;242.98196 33;257.04333 102;297.37552 12;	0.000108767	6.90988e-05	0	0.00128296	0.00108126	0.000252276	0.00134305	4.31282e-05	0	7.25522e-05	3.23871e-05	1.31301e-06	0.00254661	0.00225679	0.00197933	0.00258268	0.00216114	0	0.00209749	0	0.00229252	0	0	0.0018316	0.000265363	0.00150606	0.000228767	5.21153e-05	0.00028741	0.00018939	2.24599e-06	3.56841e-05	8.02717e-05
342_RPPOS	19.31	480.309	[M+H]+	HMDB11506	7.234	BMDB=BMDB11506,ChEBI=CHEBI:74971; CHEBI:60287,FooDB=FDB028222,HMDB=HMDB11506,PubChem=25244076,YMDB=YMDB01207	9547071	PYVRVRFVLRNJLY-MZMPXXGTSA-N	[H]OC([H])(C([H])([H])OC(=O)C([H])([H])C([H])([H])C([H])([H])C([H])([H])C([H])([H])C([H])([H])C([H])([H])C([H])=C([H])C([H])([H])C([H])([H])C([H])([H])C([H])([H])C([H])([H])C([H])([H])C([H])([H])C([H])([H])[H])C([H])([H])OP(=O)(O[H])OC([H])([H])C([H])([H])N([H])[H]	HMDB11476	7.1626	BMDB=BMDB11476,ChEBI=CHEBI:76088,FooDB=FDB028192,HMDB=HMDB11476	53480925	NOVZJYYJYIFXJC-MZMPXXGTSA-N	[H]OC([H])([H])C([H])(OC(=O)C([H])([H])C([H])([H])C([H])([H])C([H])([H])C([H])([H])C([H])([H])C([H])([H])C([H])=C([H])C([H])([H])C([H])([H])C([H])([H])C([H])([H])C([H])([H])C([H])([H])C([H])([H])C([H])([H])[H])C([H])([H])OP(=O)(O[H])OC([H])([H])C([H])([H])N([H])[H]	163.48013 47;181.50629 13;184.17398 11;194.7468 16;198.14633 49;217.19305 24;224.29648 23;265.3222 66;269.99908 10;284.37225 31;308.42496 103;324.41266 29;326.29019 16;329.22559 18;339.33124 5351;350.26636 20;357.14642 27;365.18793 14;373.7746 26;382.19122 13;408.68042 11;419.04941 463;419.67111 17;420.37198 24;422.57095 30;423.23807 18;423.95837 40;443.7561 75;462.09665 6300;463.12973 164;	0.00109733	0.000925207	0.00093129	0.00076379	0.000810018	0.000332468	0.00195941	0.00138228	0.00149144	0.00108362	0.00123057	0.000923138	0.00132553	0.00265653	0.00159286	0.00179813	0.0019352	0.00218223	0.00133127	0.00118406	0.00247206	0.0028906	0.00248266	0.00214839	0.00188835	0.00296052	0.00352457	0.00278856	0.00260343	0.00306846	0.00274581	0.00365553	0.00295284
137_HilicPos	5.58	281.14	[M+H]+	HMDB36695	7.1861	ChEBI=CHEBI:73231,FooDB=FDB015629,HMDB=HMDB36695,KNApSAcK=C00012420,PubChem=13993178,UNPD=UNPD156754; UNPD27459	13993178	JXXWNBNYEWOORY-WJXXYKATSA-N	[H]OOC2([H])(C1=C([H])C([H])([H])C3([H])(C(=C([H])[H])C(=O)OC3([H])(C([H])(O[H])C(C([H])([H])[H])(C1([H])([H]))C([H])([H])C2([H])([H]))))	HMDB41144	7.1147	FooDB=FDB021030,HMDB=HMDB41144,UNPD=UNPD128545; UNPD66723	-1	XJUFXNXZZRHROZ-UHFFFAOYNA-N	[H]OC([H])([H])C3(O[H])(C(=O)OC1([H])(C3([H])(C([H])([H])C([H])([H])C(=C([H])[H])C2([H])(C([H])([H])C(=O)C([H])(C([H])([H])[H])C12([H])))))	81.05347 483;83.07439 368;84.90752 266;86.92702 104;90.99284 1268;92.88306 31;94.99475 57;98.86325 263;100.95923 164;103.00108 96;105.00571 545;106.9331 6301;107.70983 14;111.01928 1503;115.08066 33;117.09597 155;118.94217 11210;123.09962 67;128.92212 3949;132.99771 57;134.91132 36340;135.84738 46;141.60602 15;145.22049 140;147.03448 5701;151.05774 63;153.12692 123;155.00671 51;156.89005 34;159.2…	0.0212712	0.0240048	0.0247242	0.0220519	0.0213009	0.0270871	0.0217064	0.022916	0	0.0224304	0.0240124	0.0229714	0.015809	0.013786	0.0173484	0.0168489	0.0192218	0.0225689	0.0160261	0	0.01502	0.0178596	0	0.0214643	0.0232088	0.0170753	0.0192597	0.019745	0.0139675	0.014282	0.0190676	0.0164813	0.0196503
45_RPPOS	1.29	137.071	[M+H]+	HMDB00699	7.1804	BMDB=BMDB01464; BMDB00699,ChEBI=CHEBI:16797,FooDB=FDB022639; FDB022188,HMDB=HMDB00699,PubChem=457,SMPDB=PW_C000551,YMDB=YMDB00348	10129985	LDHMAVIPBRSVRG-UHFFFAOYSA-N	[H]N=C([O-])C=1C([H])=C([H])C([H])=[N+](C=1([H]))C([H])([H])[H]	Benzamide, 2-amino-	7.0387	FooDB=FDB012155,HMDB=HMDB33947,UNPD=UNPD126962	6942	PXBFMLJZNCDSMP-UHFFFAOYSA-N	[H]N=C(O[H])C1=C([H])C([H])=C([H])C([H])=C1N([H])[H]	119.19788 19;	0.000666217	0.000800746	0.000783937	0.000662679	0.000766724	0.00092004	0.00124423	0.000942895	0.000648723	0.000765825	0.000794404	0.000750224	0.0016303	0.00118048	0.00146409	0.00140558	0.00116165	0.00127634	0.00142704	0.000233571	0.00110645	0.00112007	0.00111395	0.00116966	0.0030037	0.00156832	0.0029028	0.00183525	0.00149816	0.00146006	0.00109415	0.00143469	0.00120642
20_HilicNeg	7.02	171.103	[M-H]-	9-Oxononanoic acid	7.1784	ChEBI=CHEBI:77812; CHEBI:78700,PlantCyc=CPD-8686,PubChem=21270557; 75704	21270557	WLGDDELKYAWBBL-UHFFFAOYSA-N	[H]OC(=O)C([H])([H])C([H])([H])C([H])([H])C([H])([H])C([H])([H])C([H])([H])C([H])([H])C([H])=O	2-oxononanoic acid	6.9567	ChEBI=CHEBI:55523; CHEBI:55525	259793	SHDOPXQMNJDYDK-UHFFFAOYSA-N	[H]OC(=O)C(=O)C([H])([H])C([H])([H])C([H])([H])C([H])([H])C([H])([H])C([H])([H])C([H])([H])[H]	59.79633 10;97.20982 19;99.97748 15;111.3441 643;113.47308 14;125.34969 54;127.36522 65;144.37657 10;153.17804 1412;	0.00147611	0.000124689	0.000238932	0.00191517	0.00150788	0.000160717	0.00203003	0.00191888	0.000627276	0.000273528	0.000240105	8.91263e-05	0.00310676	0.00225185	0.00218021	0.0029915	0.00299891	0.00261924	0.00267573	0	0.00258069	0	0	0.0020664	0.000323647	0.0028631	0.00026804	7.37941e-05	0.000375433	0.000259468	0.00255395	0.00268039	0.000299373
260_RPNEG	9.15	297.134	[M-H]-	CHEBI:82266	7.1784	ChEBI=CHEBI:82266	5796	WABPPBHOPMUJHV-UHFFFAOYNA-N	[H]C1=C([H])C=2OC([H])([H])OC=2(C([H])=C1(OC([H])(OC([H])([H])C([H])([H])OC([H])([H])C([H])([H])OC([H])([H])C([H])([H])[H])C([H])([H])[H]))	HMDB37560	5.9594	FooDB=FDB016642,HMDB=HMDB37560,UNPD=UNPD13488; UNPD94135	-1	QNKGXSIDHDDDHD-UHFFFAOYNA-N	[H]OC([H])([H])C34(C([H])(OC2([H])(C([H])(O[H])C([H])([H])C3(C([H])([H])[H])(C12(OC1([H])([H])))))C([H])=C(C([H])([H])[H])C([H])(O[H])C4([H])(O[H]))	87.6499 12;88.4742 13;89.33914 150;97.35133 96;99.2943 31;101.36669 1655;103.41852 62;109.35399 15;113.27737 282;115.38295 350;125.41563 51;127.3596 196;131.16586 521;131.87503 16;143.24763 73;145.22339 189;161.08133 667;163.1933 33854;163.98926 137;213.05206 12;276.95477 22;278.85388 12;	0.0188201	0.01977	0.0222949	0.0198106	0.0212827	0.0257178	0.0056964	0.0284619	0.00974383	0.00504017	0.00572011	0.0038006	0.00258148	0.00126011	0.00070449	0.00359406	0.00439555	0.00368659	0.00395732	0.00238918	0.00102905	0.00218116	0.00276847	0.00509519	0.00494398	0.00448893	0.00343233	0.00411463	0.0022828	0.00133133	0.0037644	0.0022241	0.00271095
261_HilicPos	6.32	706.541	[M+H]+	PE(15:0/18:0)	7.1733	BMDB=BMDB08892,HMDB=HMDB08892	52924930	OZKFXEPRCADVOK-PSXMRANNSA-N	[H]OP(=O)(OC([H])([H])C([H])([H])N([H])[H])OC([H])([H])C([H])(OC(=O)C([H])([H])C([H])([H])C([H])([H])C([H])([H])C([H])([H])C([H])([H])C([H])([H])C([H])([H])C([H])([H])C([H])([H])C([H])([H])C([H])([H])C([H])([H])C([H])([H])C([H])([H])C([H])([H])C([H])([H])[H])C([H])([H])OC(=O)C([H])([H])C([H])([H])C([H])([H])C([H])([H])C([H])([H])C([H])([H])C([H])([H])C([H])([H])C([H])([H])C([H])([H])C([H])([H])C(…	PE(18:0/15:0)	7.1033	BMDB=BMDB08988,HMDB=HMDB08988	52924324	CBJZKZNOFISZSC-PSXMRANNSA-N	[H]OP(=O)(OC([H])([H])C([H])([H])N([H])[H])OC([H])([H])C([H])(OC(=O)C([H])([H])C([H])([H])C([H])([H])C([H])([H])C([H])([H])C([H])([H])C([H])([H])C([H])([H])C([H])([H])C([H])([H])C([H])([H])C([H])([H])C([H])([H])C([H])([H])[H])C([H])([H])OC(=O)C([H])([H])C([H])([H])C([H])([H])C([H])([H])C([H])([H])C([H])([H])C([H])([H])C([H])([H])C([H])([H])C([H])([H])C([H])([H])C([H])([H])C([H])([H])C([H])([H])C(…	394.30048 14;395.68231 16;450.4917 40;475.48962 27;478.35327 87;496.27393 33;503.12769 18;564.24188 16;565.63751 18;584.38409 44;688.41449 18;	0.00384241	0.00339673	0.0031909	0.00341049	0.0027027	0.0017358	0.00385914	0.00530921	0	0.00369989	0.00321684	0.00354167	0.00580249	0.00667021	0.00630999	0.00641281	0.00595297	0.00632058	0.0037304	0	0.00726639	0.0075265	0	0.00664882	0.0109326	0.00957221	0.0110023	0.011655	0.0135354	0.0109703	0.0104666	0.010738	0.0111426
280_RPPOS	14.43	415.212	[M+H]+	HMDB37039	7.1432	FooDB=FDB016021,HMDB=HMDB37039,KNApSAcK=C00021453,UNPD=UNPD133812	-1	GYCBSZGIYPNYAB-UHFFFAOYNA-N	[H]OC4=C([H])C(O[H])=C(C(=O)OC1([H])(C([H])([H])C2(C([H])([H])[H])(C3([H])(C([H])([H])C(C([H])([H])[H])(C([H])([H])[H])C([H])([H])C3([H])(C([H])=C(C([H])=O)C12(OC([H])([H])[H]))))))C(=C4([H]))C([H])([H])[H]	HMDB39380	7.041	FooDB=FDB018945,HMDB=HMDB39380,UNPD=UNPD25702	-1	ISKWRTCZWOXOOF-UHFFFAOYNA-N	[H]OC=4C([H])=C(OC([H])([H])[H])C([H])=C(C=4(C(=O)OC1([H])(C([H])([H])C2(C([H])([H])[H])(C3([H])(C([H])([H])C(C([H])([H])[H])(C([H])([H])[H])C([H])([H])C3([H])(C([H])=C(C([H])=O)C12(O[H])))))))C([H])([H])[H]	119.30371 1377;120.02394 43;127.3226 235;133.33678 269;137.5434 12;144.84787 48;151.21664 30;157.36774 17;184.90259 11;197.32219 11;199.30457 108;203.23921 11;217.20679 38;245.67603 14;247.14874 96;251.27914 10;253.52615 26;259.02582 83;263.27924 17;272.35696 17;277.00201 184;279.09979 95;284.94116 28;288.90198 19;295.10992 550;312.246 21;317.02304 10;325.38846 20;332.16528 44;334.35626 11;355.22…	0.000486068	0.000580055	0.000583263	0.000760503	0.00057815	0.000480862	0.000328069	0.000414805	0.000804097	0.000701609	0.000800165	0.000745391	0.000444308	0.000130477	0	0.000219326	0.000563788	0.000288402	0.000135479	0.00115533	0.000183958	0.000139172	0.000254896	0.000632335	0.000478237	0.000506654	0.000408132	0.000461787	0.00021841	0.000259343	0.00058202	0.000627354	0.000360412
1276_RPNEG	17.57	500.277	[M-H]-	HMDB11518	7.13	BMDB=BMDB11518,ChEBI=CHEBI:72742,FooDB=FDB028234,HMDB=HMDB11518	53480952	JPNPIRVRGLGTRE-YSKCIPFOSA-N	[H]OC([H])(C([H])([H])OC(=O)C([H])([H])C([H])([H])C([H])([H])C([H])([H])C([H])([H])C([H])([H])C([H])=C([H])C([H])([H])C([H])=C([H])C([H])([H])C([H])=C([H])C([H])([H])C([H])=C([H])C([H])([H])C([H])([H])[H])C([H])([H])OP(=O)(O[H])OC([H])([H])C([H])([H])N([H])[H]	HMDB11488	7.13	BMDB=BMDB11488,ChEBI=CHEBI:72746,FooDB=FDB028204,HMDB=HMDB11488	53480937	BAKUYTLDCVITBO-YSKCIPFOSA-N	[H]OC([H])([H])C([H])(OC(=O)C([H])([H])C([H])([H])C([H])([H])C([H])([H])C([H])([H])C([H])([H])C([H])=C([H])C([H])([H])C([H])=C([H])C([H])([H])C([H])=C([H])C([H])([H])C([H])=C([H])C([H])([H])C([H])([H])[H])C([H])([H])OP(=O)(O[H])OC([H])([H])C([H])([H])N([H])[H]	190.9725 40;196.16049 49;205.3956 151;211.85684 11;214.16333 316;217.43054 12;223.44783 13;259.25421 1145;285.17715 24;301.38031 19;303.24512 12766;303.9126 40;331.86945 11;384.78763 21;440.91364 16;441.54599 35;449.4584 10;478.03329 34;480.24789 20;480.96307 16;499.50388 12;	0	0	0	0	0	0	0	0	0	0	0	0	0.000260284	0.00050007	0	0.000118823	0	0.000443099	0.000513135	0.000615459	0.000308261	0.00102498	0.00115446	0.00213015	0.000833174	0.00373143	0.00224404	0.00396035	0.000259104	0.00243616	0.000270611	0.00225174	0.00309487
189_HilicPos	7.45	480.311	[M+H]+	1-18:1-lysoPE	7.0919	BMDB=BMDB11506,ChEBI=CHEBI:74971; CHEBI:60287,FooDB=FDB028222,HMDB=HMDB11506,PubChem=25244076,YMDB=YMDB01207	9547071	PYVRVRFVLRNJLY-MZMPXXGTSA-N	[H]OC([H])(C([H])([H])OC(=O)C([H])([H])C([H])([H])C([H])([H])C([H])([H])C([H])([H])C([H])([H])C([H])([H])C([H])=C([H])C([H])([H])C([H])([H])C([H])([H])C([H])([H])C([H])([H])C([H])([H])C([H])([H])C([H])([H])[H])C([H])([H])OP(=O)(O[H])OC([H])([H])C([H])([H])N([H])[H]	HMDB11505	6.9848	BMDB=BMDB11505,FooDB=FDB028221,HMDB=HMDB11505	53480949	WAYKKNOEMJFLDI-KOIKXXGWSA-N	[H]OC([H])(C([H])([H])OC(=O)C([H])([H])C([H])([H])C([H])([H])C([H])([H])C([H])([H])C([H])([H])C([H])([H])C([H])([H])C([H])([H])C([H])=C([H])C([H])([H])C([H])([H])C([H])([H])C([H])([H])C([H])([H])C([H])([H])[H])C([H])([H])OP(=O)(O[H])OC([H])([H])C([H])([H])N([H])[H]	155.09718 34;180.95239 88;183.77586 87;193.90628 21;208.9136 15;240.00311 64;265.24481 50;266.93765 40;281.78506 14;297.35907 15;308.37015 71;313.0658 25;321.11505 19;326.43036 80;339.18655 3683;339.93668 16;349.3353 29;376.95816 16;378.0408 32;418.98825 277;436.8743 16;444.2067 12;445.19821 22;462.08102 3300;462.89938 28;	0.00208323	0.00163381	0.00148761	0.00103158	0.00228899	0.000876288	0.00158778	0.00187233	0	0.00171876	0.0021981	0.00156539	0.00275059	0.00265126	0.00379096	0.0026657	0.00265602	0.00312777	0.00256702	0	0.00285218	0.00299501	0	0.00285782	0.00142307	0.0032197	0.00266532	0.0024282	0.00279421	0.00284584	0.00276972	0.00234808	0.00228063
138_RPPOS	11.63	244.191	[M+H]+	N-Undecanoylglycine	7.0602	ChEBI=CHEBI:74438,HMDB=HMDB13286	454092	HEUQYIQQCNOXOG-UHFFFAOYSA-N	[H]OC(=O)C([H])([H])N([H])C(=O)C([H])([H])C([H])([H])C([H])([H])C([H])([H])C([H])([H])C([H])([H])C([H])([H])C([H])([H])C([H])([H])C([H])([H])[H]							146.33382 17;155.29903 10;208.26807 35;216.05243 12;226.14534 16252;227.15858 115;	0.000577367	0.00163898	0.00238412	0.00146467	0.00138646	0.000867172	0.00116367	0.000539112	0.00133615	0.000924533	0.000856129	0.00230313	0.0016968	0.00102996	0.00301439	0.00171958	0.00117742	0.00307516	0.00241213	0.00220694	0.00159728	0.00344144	0.00385192	0.00479774	0.00375455	0.00228908	0.00201274	0.0031832	0.002418	0.00154909	0.00391142	0.0033296	0.00315735
52_HilicNeg	5.28	297.243	[M-H]-	KNApSAcK:C00000391	7.0362	ChEBI=CHEBI:82464,KNApSAcK=C00000391,PlantCyc=CPD-10514,PubChem=19746553; 15868,UNPD=UNPD151173; UNPD16508	15868	IMYZYCNQZDBZBQ-UHFFFAOYNA-N	[H]OC(=O)C([H])([H])C([H])([H])C([H])([H])C([H])([H])C([H])([H])C([H])([H])C([H])([H])C1([H])(OC1([H])(C([H])([H])C([H])([H])C([H])([H])C([H])([H])C([H])([H])C([H])([H])C([H])([H])C([H])([H])[H]))	6R,7S-Epoxy-octadecanoic acid	6.9364	ChEBI=CHEBI:34004	656738	PVMIAUUBHIBDJY-DLBZAZTESA-N	[H]OC(=O)C([H])([H])C([H])([H])C([H])([H])C([H])([H])C1([H])(OC1([H])(C([H])([H])C([H])([H])C([H])([H])C([H])([H])C([H])([H])C([H])([H])C([H])([H])C([H])([H])C([H])([H])C([H])([H])C([H])([H])[H]))	101.33438 11;125.53627 46;137.36441 11;139.37277 84;141.09251 52;153.40115 36;155.38882 14;157.24078 25;163.18802 20;167.54175 13;171.22075 60;181.38101 18;183.02606 161;184.30386 68;195.20711 22;197.34351 41;198.24066 27;199.15726 31;207.28925 19;209.45517 14;211.06464 50;213.42352 68;221.79282 15;223.48978 28;225.28232 123;227.2514 28;233.03223 14;235.41156 18;237.31882 320;239.52695 15;251.353…	0.00253606	0.00268618	0.00260467	0.00319937	0.00253778	0.00208579	0.00331802	0.00283738	0	0.00305831	0.00249238	0.00267148	0.00654591	0.00441554	0.00424937	0.00612309	0.00641954	0.00497554	0.00531848	0	0.00560069	0	0	0.00478986	0.000440301	0.00472799	0.0034517	0.000171888	0.00332913	0.0031989	0.00450259	0.00409971	0.00420231
76_HilicNeg	5.29	449.15	[M-H]-	CHEBI:66204	7.0072	ChEBI=CHEBI:66204,UNPD=UNPD45439	16091520	GTYGWPXLHJZXDF-MIUGBVLSSA-N	[H]OC1=C([H])C([H])=C(C([H])=C1([H]))C([H])([H])C(=O)OC3([H])(C([H])(OC([H])([H])C([H])([H])C=2C([H])=C([H])C(O[H])=C(O[H])C=2([H]))OC([H])(C([H])([H])O[H])C([H])(O[H])C3([H])(O[H]))	CHEBI:2515	6.9288	ChEBI=CHEBI:2515,UNPD=UNPD79515	53297353	AJNRZGCOXRHMEZ-ZDRHXKJUSA-N	[H]OC1=C([H])C([H])=C(C([H])=C1([H]))C(=O)OC([H])([H])C3=C([H])C([H])([H])C4([H])(C([H])=C([H])OC([H])(OC2([H])(OC([H])(C([H])([H])O[H])C([H])(O[H])C([H])(O[H])C2([H])(O[H])))C34([H]))	149.2606 179;151.13428 59;163.05359 36;179.09447 291;181.07385 10;205.21593 171;210.7108 16;213.04144 50;214.11429 26;224.91742 197;225.91241 18;226.98904 384;243.05997 6581;244.11823 74;267.26837 15;281.10208 19;282.67334 27;285.15735 1595;316.20117 14;317.08026 20;319.19788 22;326.25943 39;329.13989 13;331.05035 50;332.39026 26;347.68469 19;349.43646 26;353.32294 11;355.1452 9909;356.14148 22;3…	0.0104721	0.00701264	0.00858781	0.0117229	0.00753707	0.0065331	0.00819254	0.00793015	0	0.0181042	0.00776762	0.0053845	0.0788947	0.0851158	0.0923972	0.0495969	0.0176785	0.0192642	0.0631695	0	0.0622336	0	0	0.0158695	0.00583539	0.00879076	0.0154456	0.000312291	0.0291883	0.0185831	0.0161515	0.038759	5.03076e-05
606_RPNEG	8.75	343.139	[M-H]-	CHEBI:2320	7.0063	ChEBI=CHEBI:2320; CHEBI:5969,UNPD=UNPD109320; UNPD131874; UNPD162544; UNPD169054; UNPD35998; UNPD93317; UNPD98631	155942	MRIFZKMKTDPBHR-XLOWEYQUSA-N	[H]OC([H])([H])C3([H])(OC([H])(OC1([H])(OC([H])=C(C([H])=O)C2([H])(C([H])([H])C([H])([H])C([H])(C([H])([H])[H])C12([H]))))C([H])(O[H])C([H])(O[H])C3([H])(O[H]))	HMDB41509	6.9192	FooDB=FDB021481,HMDB=HMDB41509,KNApSAcK=C00030133,PlantCyc=CPD-82,UNPD=UNPD85189	-1	QFYFLJZBZITPGX-UHFFFAOYNA-N	[H]OC([H])([H])C([H])([H])C([H])([H])C=2C([H])=C([H])C(OC1([H])(OC([H])(C([H])([H])O[H])C([H])(O[H])C([H])(O[H])C1([H])(O[H])))=C(OC([H])([H])[H])C=2([H])	85.44317 12;97.4792 22;101.32726 84;109.36886 31;115.31596 20;120.11222 19;131.07225 13;161.06763 47;163.28159 2031;238.97229 11;304.65125 33;306.979 15;	0.135159	0.142947	0.143459	0.142674	0.114582	0.0086702	0.00217428	0.00933327	0.0521168	0.120434	0.0713036	0.0573388	0.0340196	0.0153955	0.00678869	0.0460369	0.0574827	0.0579115	0.0539036	0.0312454	0.0120393	0.0277934	0.0352672	0.0659688	0.0658628	0.0566327	0.0442223	0.0499573	0.0319942	0.0166643	0.0448527	0.0315249	0.0223392
1228_RPNEG	18.38	452.277	[M-H]-	HMDB11503	6.9742	BMDB=BMDB11503,ChEBI=CHEBI:73134; CHEBI:73004,FooDB=FDB028219,HMDB=HMDB11503,SMPDB=PW_C007100,YMDB=YMDB01197	58177710	YVYMBNSKXOXSKW-HXUWFJFHSA-N	[H]OC([H])(C([H])([H])OC(=O)C([H])([H])C([H])([H])C([H])([H])C([H])([H])C([H])([H])C([H])([H])C([H])([H])C([H])([H])C([H])([H])C([H])([H])C([H])([H])C([H])([H])C([H])([H])C([H])([H])C([H])([H])[H])C([H])([H])OP(=O)(O[H])OC([H])([H])C([H])([H])N([H])[H]	HMDB11473	6.8671	BMDB=BMDB11473,FooDB=FDB028189,HMDB=HMDB11473	53480922	CKPBBEOJHAPPBT-HXUWFJFHSA-N	[H]OC([H])([H])C([H])(OC(=O)C([H])([H])C([H])([H])C([H])([H])C([H])([H])C([H])([H])C([H])([H])C([H])([H])C([H])([H])C([H])([H])C([H])([H])C([H])([H])C([H])([H])C([H])([H])C([H])([H])C([H])([H])[H])C([H])([H])OP(=O)(O[H])OC([H])([H])C([H])([H])N([H])[H]	153.07599 19;173.40744 18;196.16016 42;214.23328 410;215.01996 10;215.9617 20;219.526 12;253.35791 10;255.24991 19894;256.03827 72;295.11163 33;317.1593 15;337.11923 30;346.19916 26;351.15668 27;364.70355 11;389.9386 11;392.28384 565;394.36725 15;413.89337 14;414.88828 12;434.69302 24;	0	0	0	0	0	0	0	0	0	0	0	0	7.81027e-05	0	0	0	0	0	0.000175469	0.000137853	0	0.00023809	0.000428889	0.00104858	0.00069413	0.00140235	0.000664505	0.000314299	0.000582497	0.000329256	0.00109341	0.000109879	0.00200378
139_RPPOS	5.82	246.17	[M+H]+	HMDB00688	6.9724	BMDB=BMDB00688,ChEBI=CHEBI:73025; CHEBI:70819,FooDB=FDB022183,HMDB=HMDB00688	169235	IGQBPDJNUXPEMT-UHFFFAOYNA-N	[H]C([H])([H])C([H])(C([H])([H])[H])C([H])([H])C(=O)OC([H])(C([H])([H])C(=O)[O-])C([H])([H])[N+](C([H])([H])[H])(C([H])([H])[H])C([H])([H])[H]	HMDB00378	6.9724	BMDB=BMDB00378,ChEBI=CHEBI:73026; CHEBI:84840,FooDB=FDB021996,HMDB=HMDB00378	9881339	IHCPDBBYTYJYIL-UHFFFAOYNA-N	[H]C([H])([H])C([H])([H])C([H])(C(=O)OC([H])(C([H])([H])C(=O)[O-])C([H])([H])[N+](C([H])([H])[H])(C([H])([H])[H])C([H])([H])[H])C([H])([H])[H]	82.90223 12;85.36597 6331;86.2515 22;103.15213 24;106.49783 19;116.11681 16;144.3214 155;146.38535 33;148.35431 237;158.1158 12;166.94344 41;168.45665 24;169.09874 21;171.32391 28;173.12425 17;176.39424 13;183.16521 28;187.15849 4545;188.14229 16;210.9662 35;213.52806 12;214.32915 29;217.75047 11;228.45528 208;229.11101 141;	0.0010569	0.000724741	0.000944426	0.000979719	0.000891115	0.000749796	0.00105803	0.000772289	0.00144599	0.00067319	0.000951089	0.000768987	0.00280691	0.00220104	0.0010224	0.00239321	0.00249713	0.00133827	0.00219267	0.00110933	0.0010621	0.00145583	0.00141497	0.00185441	0.000426563	0.00130339	0.000750846	0.000954353	0.00108087	0.000804186	0.0020321	0.00116852	0.00141341
223_RPPOS	18.04	340.358	[M+H]+	Docosanamide	6.9634	BMDB=BMDB00583,FooDB=FDB022129,HMDB=HMDB00583,STOFF=SI00007983	76468	ORAWFNKFUWGRJG-UHFFFAOYSA-N	[H]N([H])C(=O)C([H])([H])C([H])([H])C([H])([H])C([H])([H])C([H])([H])C([H])([H])C([H])([H])C([H])([H])C([H])([H])C([H])([H])C([H])([H])C([H])([H])C([H])([H])C([H])([H])C([H])([H])C([H])([H])C([H])([H])C([H])([H])C([H])([H])C([H])([H])C([H])([H])[H]							109.44888 18;112.74161 21;113.44986 13;137.35609 16;155.33102 5682;163.09824 17;182.97165 22;186.32382 4361;186.92892 13;200.41968 71;208.98944 14;240.05536 12;247.8736 13;257.87961 15;281.90701 17;310.44305 12;312.00073 31;321.26328 16;322.26694 98;323.10706 121;340.27701 49;	0.000463145	0.000447122	0.000470504	0.000506243	0.000446744	0.000346707	0.000170159	0.000392569	0.000600514	0.000361728	0.000343428	0.000368089	0.000285148	0.000325781	1.80455e-05	0.000249069	0.000328836	0.000101511	0.000307273	0.00052512	0.000262377	0.000282653	0.000266274	0.000269344	0.000295387	0.000951954	0.000507841	0.000651286	0.000430087	0.000868008	0.000819411	0.000597737	0.000780187
89_RPNEG	8.76	187.097	[M-H]-	Azelaate	6.9522	BMDB=BMDB00784,ChEBI=CHEBI:48131; CHEBI:78208,DrugBank=DB00548,HMDB=HMDB00784,KNApSAcK=C00045634,PubChem=2266,T3DB=T3D4799,UNPD=UNPD104030,STOFF=SI00002843	2266	BDJRBEYXGGNYIS-UHFFFAOYSA-N	[H]OC(=O)C([H])([H])C([H])([H])C([H])([H])C([H])([H])C([H])([H])C([H])([H])C([H])([H])C(=O)O[H]	HMDB11717	6.7379	BMDB=BMDB11717,FooDB=FDB028402,HMDB=HMDB11717	16058309	FNZSVEHJZREFPF-ZETCQYMHSA-N	[H]OC(=O)C([H])([H])C([H])(C(=O)O[H])C([H])([H])C([H])([H])C([H])([H])C([H])([H])C([H])([H])[H]	97.52168 44;123.30536 11;125.30057 2500;126.93987 12;151.20284 15;167.15791 13;169.28821 93;	0.00364339	0.00467789	0.00427853	0.00429851	0.00444492	0.00532629	0.00557154	0.00672546	0.00522412	0.00405023	0.00492587	0.00484749	0.00670125	0.00566089	0.00601436	0.00874617	0.00821089	0.00926937	0.00526374	0.00687777	0.00772304	0.00764652	0.00745934	0.00700847	0.00442217	0.00606564	0.00593895	0.0084389	0.00477205	0.00599599	0.00784654	0.00690074	0.00748989
365_RPPOS	17.85	502.293	[M+H]+	HMDB11488	6.9496	BMDB=BMDB11488,ChEBI=CHEBI:72746,FooDB=FDB028204,HMDB=HMDB11488	53480937	BAKUYTLDCVITBO-YSKCIPFOSA-N	[H]OC([H])([H])C([H])(OC(=O)C([H])([H])C([H])([H])C([H])([H])C([H])([H])C([H])([H])C([H])([H])C([H])=C([H])C([H])([H])C([H])=C([H])C([H])([H])C([H])=C([H])C([H])([H])C([H])=C([H])C([H])([H])C([H])([H])[H])C([H])([H])OP(=O)(O[H])OC([H])([H])C([H])([H])N([H])[H]	HMDB11518	6.9496	BMDB=BMDB11518,ChEBI=CHEBI:72742,FooDB=FDB028234,HMDB=HMDB11518	53480952	JPNPIRVRGLGTRE-YSKCIPFOSA-N	[H]OC([H])(C([H])([H])OC(=O)C([H])([H])C([H])([H])C([H])([H])C([H])([H])C([H])([H])C([H])([H])C([H])=C([H])C([H])([H])C([H])=C([H])C([H])([H])C([H])=C([H])C([H])([H])C([H])=C([H])C([H])([H])C([H])([H])[H])C([H])([H])OP(=O)(O[H])OC([H])([H])C([H])([H])N([H])[H]	145.31207 50;147.38921 76;149.43213 17;151.29663 32;155.31563 155;157.28146 51;159.21027 41;161.44373 91;163.21835 30;169.15544 24;171.30756 108;173.28275 100;175.35162 217;177.25882 43;178.99406 29;181.21512 32;183.21024 18;184.19131 10;185.08818 176;187.0909 107;187.7186 15;189.35979 244;191.25684 22;195.20947 37;198.15289 105;199.30283 139;201.29706 159;203.22563 821;205.28734 63;211.40117 11;…	0.00103556	0.000980212	0.000751005	0.00102414	0.00081574	0.000287784	0.00121231	0.00116747	0.000836852	0.000932425	0.000884604	0.000986896	0.00129294	0.00192399	0.000852594	0.00154632	0.00146217	0.00170106	0.00100861	0.000931655	0.00168433	0.00190831	0.00163825	0.00153979	0.00132925	0.0019693	0.0023617	0.00184761	0.00176096	0.00173044	0.00191249	0.00197733	0.00256896
56_RPPOS	1.33	148.06	[M+H]+	HMDB06556	6.9103	BMDB=BMDB06556,ChEBI=CHEBI:27809,ECMDB=ECMDB06556,FooDB=FDB023970,HMDB=HMDB06556,PubChem=25201126,SMPDB=PW_C002808,YMDB=YMDB00720	25201126	XCXUZPXOFFRGGP-DMTCNVIQSA-N	[H]OC(=O)C([H])(N([H])[H])C([H])([H])C([H])(O[H])C([H])=O	HMDB00148	6.6191	BMDB=BMDB00148; BMDB03339,ChEBI=CHEBI:64220; CHEBI:64243; CHEBI:64244; CHEBI:15966; CHEBI:16015; CHEBI:18237; CHEBI:29985; CHEBI:29986; CHEBI:14321; CHEBI:29987; CHEBI:29988; CHEBI:29989; CHEBI:76051,DrugBank=DB00142,ECMDB=ECMDB00148,FooDB=FDB023148; FDB012534,HMDB=HMDB00148; HMDB03339; HMDB60475,KNApSAcK=C00001358,PlantCyc=GLT; D-GLT,PubChem=23327; 33032; 5460299; 5460297; 611,SMPDB=PW_C000095; …	56927896	WHUUTDBJXJRKMK-UHFFFAOYNA-N	[H]OC(=O)C([H])([H])C([H])([H])C([H])(C(=O)O[H])N([H])[H]	74.38465 282;75.34467 33;76.41178 49;84.37817 227;85.48793 30;87.63316 13;88.44024 26;118.88319 12;119.64159 23;120.28188 89;130.23167 3757;131.23892 433;	0.000468043	0.000507961	0.000413841	0.000380115	0.000440647	0.000433276	0.000980392	0.000605074	0.000432178	0.000402581	0.00051188	0.000439599	0.000914763	0.000714193	0.000879514	0.000886496	0.000872085	0.000784793	0.000780491	0.000531928	0.000747718	0.000847573	0.000840563	0.00067237	0.00410577	0.00298413	0.00360109	0.0032078	0.00178665	0.0019928	0.00144551	0.00225437	0.00198835
372_RPPOS	19.57	510.356	[M+H]+	HMDB12108	6.9077	BMDB=BMDB12108,ChEBI=CHEBI:74340,FooDB=FDB028772,HMDB=HMDB12108,UNPD=UNPD130814	24779463	SRRQPVVYXBTRQK-XMMPIXPASA-N	[H]OC([H])(C([H])([H])OC(=O)C([H])([H])C([H])([H])C([H])([H])C([H])([H])C([H])([H])C([H])([H])C([H])([H])C([H])([H])C([H])([H])C([H])([H])C([H])([H])C([H])([H])C([H])([H])C([H])([H])C([H])([H])C([H])([H])[H])C([H])([H])OP(=O)([O-])OC([H])([H])C([H])([H])[N+](C([H])([H])[H])(C([H])([H])[H])C([H])([H])[H]	HMDB11511	6.2205	BMDB=BMDB11511,FooDB=FDB028227,HMDB=HMDB11511	52925131	HEQMDGOBDIGJOC-XMMPIXPASA-N	[H]OC([H])(C([H])([H])OC(=O)C([H])([H])C([H])([H])C([H])([H])C([H])([H])C([H])([H])C([H])([H])C([H])([H])C([H])([H])C([H])([H])C([H])([H])C([H])([H])C([H])([H])C([H])([H])C([H])([H])C([H])([H])C([H])([H])C([H])([H])C([H])([H])C([H])([H])[H])C([H])([H])OP(=O)(O[H])OC([H])([H])C([H])([H])N([H])[H]	177.095 14;184.24419 2094;185.43912 13;259.27765 34;283.07294 67;292.42368 44;298.81287 29;315.29541 13;318.03705 13;322.79102 18;327.33203 29;336.65009 25;338.43268 40;354.271 14;371.18561 23;375.83221 11;386.62317 29;389.35181 58;391.21527 11;394.32379 17;396.35999 12;418.7915 13;436.98688 13;442.86914 16;449.12415 24;451.29242 12;472.16974 15;473.44312 26;474.05957 29;475.66522 32;486.70239 12…	0.00014452	0.000151545	0.000154357	0.000163258	0.000140701	8.98262e-05	0.00019013	0.000109179	0.000125365	0.000166659	0.000151479	0.000120638	0.000149884	0.000261601	0.000195799	0.000224847	0.000189746	0.000200655	0.000144233	0.000197043	0.000240571	0.00025097	0.000208991	0.000227044	0.000229395	0.0002606	0.000163715	0.000219597	0.000282037	0.000220908	0.000401451	0.000235354	0.000154383
15_RPNEG	3.17	115.04	[M-H]-	Ethyl 2-oxopropanoate	6.907	DrugBank=DB05869,KNApSAcK=C00050457,PubChem=12041,UNPD=UNPD20995	12041	XXRCUYVCPSWGCC-UHFFFAOYSA-N	[H]C([H])([H])C(=O)C(=O)OC([H])([H])C([H])([H])[H]	Ethyl 2-hydroxyacrylate	6.7927	FooDB=FDB008294,HMDB=HMDB31643	11228779	PSYUBHDPOIZRST-UHFFFAOYSA-N	[H]OC(=C([H])[H])C(=O)OC([H])([H])C([H])([H])[H]	87.3374 31;	0.000872547	0.000956123	0.000867538	0.000254787	0.00086417	0.00136985	0.00112494	0.000807006	0.000971219	0.00074202	0.00112173	0.0010604	0.000663124	0.000899217	0.000270778	0.00111873	0.000909902	0.00134288	0.000783281	0.00109519	0.0014941	0.00100819	0.00134496	0.00153259	0.000853345	0.000909618	0.000947244	0.00101005	0.00127536	0.000687849	0.00247153	0.000813615	0.0022568
231_RPNEG	6.26	275.068	[M-H]-	C00001322	6.9029	ChEBI=CHEBI:8778,KNApSAcK=C00001322,T3DB=T3D4063,UNPD=UNPD100346; UNPD4495; UNPD95741	441581	TYWXNGXVSZRXNA-NVZSGMJQSA-N	[H]OC([H])([H])C2([H])(OC([H])(OC([H])([H])C1([H])(OC(=O)C([H])=C1([H])))C([H])(O[H])C([H])(O[H])C2([H])(O[H]))	HMDB04818	6.6145	BMDB=BMDB04818,ChEBI=CHEBI:74092,HMDB=HMDB04818,PubChem=83863	83863	QPFQYMONYBAUCY-ZKWXMUAHSA-N	[H]OC(=O)C([H])([H])C([H])([H])C([H])([H])C([H])([H])C1([H])(C2([H])(N([H])C(=O)N([H])C2([H])(C([H])([H])S1(=O)(=O))))	93.2301 150;143.07135 22;151.13394 1391;157.19914 15;161.25436 15;181.13409 1511;187.34747 21;191.36792 25;199.26401 12;211.32288 10;238.92523 25;245.05463 10;257.29099 52;274.77908 12;	0	0	0	0	0	0	0.00131506	0	0.000602471	0.000724918	0.000584201	0.000388172	0.0019798	0.00247311	0.00276242	0.00101795	0.000466462	0.000277943	0.000612225	0.00136797	0.00172466	0.00176703	0.00135293	0.000567091	0.000273154	0.000470009	0.000409831	0	0.000702406	0.000603584	0.000406338	0.00114864	0
454_RPNEG	8.49	333.109	[M-H]-	CHEBI:60219	6.8956	ChEBI=CHEBI:60219	13187921	PSPRNQOVLYLHSA-CPCZMJQVSA-N	[H]OC(=O)C2([H])(N=C(N1C([H])(C(=O)O[H])C(C([H])([H])[H])(C([H])([H])[H])SC12([H]))C([H])([H])C3=C([H])C([H])=C([H])C([H])=C3([H]))	HMDB29404	6.4904	FooDB=FDB000493,HMDB=HMDB29404,UNPD=UNPD124832	-1	OURYTICKCZBKFC-UHFFFAOYNA-N	[H]OC(=O)C([H])(N([H])[H])C([H])([H])C=1C(=O)ON(C=1([H]))C2([H])(OC([H])(C([H])([H])O[H])C([H])(O[H])C([H])(O[H])C2([H])(O[H]))	97.44186 21;137.45972 19;155.40291 12;171.2009 175;192.20554 13;201.28722 11;211.09143 27;215.1557 690;218.02859 56;229.19913 193;242.97836 18;249.05399 54;255.14294 11960;255.75848 45;261.0661 10;273.28424 13;297.17682 49;305.13345 18;312.9783 12;315.13647 15;	0.0046126	0.00440626	0.00548167	0.00600489	0.00516665	0.00532783	0.000744492	0.0037977	0.0226704	0.0154735	0.0191039	0.0742327	0.0379483	0.00204257	0.0131065	0.00475085	0.0592799	0.0544112	0.0611149	0.0343449	0.0139433	0.0279766	0.0325503	0.055731	0.054768	0.0496869	0.0420722	0.0588474	0.025578	0.0214804	0.0435636	0.0348107	0.0381969
300_RPPOS	19.39	438.298	[M+H]+	HMDB11152	6.8892	BMDB=BMDB11152,HMDB=HMDB11152	42607469	QYTPGOPLNFESQC-NUTQULCTSA-N	[H]OC([H])(C([H])([H])OC([H])=C([H])C([H])([H])C([H])([H])C([H])([H])C([H])([H])C([H])([H])C([H])([H])C([H])([H])C([H])([H])C([H])([H])C([H])([H])C([H])([H])C([H])([H])C([H])([H])C([H])([H])[H])C([H])([H])OP(=O)(O[H])OC([H])([H])C([H])([H])N([H])[H]	C00016560	6.2219	KNApSAcK=C00016560,PubChem=10094631,UNPD=UNPD88970	10094631	SVYIMXYKHRBHSG-UHFFFAOYNA-N	[H]OC5([H])(C([H])([H])C([H])(OC6([H])(C([H])([H])C([H])([H])C4(C([H])([H])[H])(C([H])(C([H])([H])C([H])([H])C3([H])(C([H])([H])C=2C1=C([H])C([H])=C([H])C([H])=C1N([H])C=2C34(C([H])([H])[H])))C56(C([H])([H])[H]))))C(O[H])(C([H])([H])[H])C([H])([H])[H])	133.31381 19;144.33725 18;198.09589 12;223.91025 12;239.32101 18;266.35028 1892;284.29535 6379;285.0014 34;288.33554 15;303.15549 14;322.7688 40;335.11011 10;340.87164 10;343.33447 30;346.48981 21;360.9989 14;363.74286 57;364.45148 159;401.76328 63;420.22769 11366;420.98508 33;438.20853 13;	0.000828955	0.000561169	0.000465537	0.000244786	0.000468781	0.00024346	0.00150361	0.000737649	0.0011994	0.000675279	0.000812055	0.000423449	0.000993436	0.00153937	0.00147644	0.00135219	0.00151491	0.00155682	0.000768474	0.000610236	0.0015185	0.00144596	0.00198841	0.00122076	0.000815203	0.00142993	0.00124808	0.00125385	0.00124877	0.00141744	0.00122147	0.00177006	0.00123495
45_RPNEG	5.54	157.05	[M-H]-	HMDB36380	6.8697	FooDB=FDB015258,HMDB=HMDB36380,UNPD=UNPD119899	-1	JOWYHBUWSWRYOG-UHFFFAOYNA-N	[H]OC1([H])(C(=O)C(OC([H])([H])[H])=C(OC1([H])([H]))C([H])([H])[H])	HMDB59815	6.6579	FooDB=FDB029766,HMDB=HMDB59815	-1	MJQGWRVDIFBMNW-UHFFFAOYNA-N	[H]C([H])([H])C([H])([H])OC(=O)C1([H])(OC(=O)C([H])([H])C1([H])([H]))	95.30267 14;129.29274 79;	0.000181862	0.0002578	0.000222854	0.000208374	0.000245004	0.000354133	0.000935099	0.000355619	0.00087732	0.000911868	0.00101327	0.00117074	0.00126494	0.000947386	0.00101558	0.00161388	0.00165301	0.00220201	0.00141547	0.00125785	0.00112329	0.0012348	0.00118304	0.00119103	0.00086662	0.00136132	0.00108383	0.00150178	0.00073278	0.000956643	0.00163647	0.00158564	0.00145287
324_RPPOS	19.82	464.314	[M+H]+	Santemycin	6.8578	ChEBI=CHEBI:81283,KNApSAcK=C00018016,UNPD=UNPD100732	3037206	DNYGXMICFMACRA-XHEDQWPISA-N	[H]OC1([H])(C([H])(OC([H])([H])C(O[H])(C([H])([H])[H])C1([H])(N([H])C([H])([H])[H]))OC3([H])(C([H])(O[H])C([H])(OC2([H])(OC([H])(C([H])([H])N([H])C([H])([H])[H])C([H])([H])C([H])([H])C2([H])(N([H])[H])))C([H])(N([H])[H])C([H])([H])C3([H])(N([H])[H])))	CHEBI:28292	6.7864	ChEBI=CHEBI:28292	439633	XUFIWSHGXVLULG-JYDJLPLMSA-N	[H]OC1([H])(C([H])(OC([H])([H])C(O[H])(C([H])([H])[H])C1([H])(N([H])C([H])([H])[H]))OC3([H])(C([H])(O[H])C([H])(OC2([H])(OC([H])(C([H])([H])C([H])([H])C2([H])(N([H])[H]))C([H])(N([H])[H])C([H])([H])[H]))C([H])(N([H])[H])C([H])([H])C3([H])(N([H])[H])))	155.19485 24;171.03664 22;172.95401 107;176.09256 10;194.53342 13;208.4928 12;209.28821 20;216.45723 17;222.42188 14;248.31793 12;273.9736 29;275.41376 59;292.23779 1810;292.84155 14;295.30908 44;306.11163 18;310.36084 5945;316.94617 14;324.36789 13;330.5965 12;333.89386 40;336.35651 13;338.39978 14;350.2749 15;365.16138 14;371.06372 35;375.38751 13;376.20416 15;378.95273 13;380.04269 93;384.8313…	0.000146059	0	0.00021179	0	7.15698e-05	0	0.000276129	0.000196926	0.000252633	6.42499e-05	0.000166785	5.81679e-06	0.000162129	0.000331893	0.000230274	0.000276554	0.000225542	0.000283752	0.000186653	0.000128552	0.000311001	0.000341796	0.000352344	0.000236234	0.000163245	0.000291999	0.000197508	0.000201125	0.000234778	0.000249229	0.000193107	0.000331494	0.000191342
30_HilicPos	5.58	119.086	[M+H]+	INDAN	6.8153	ChEBI=CHEBI:37911,HMDB=HMDB59837,UNPD=UNPD173456	10326	PQNFLJBBNBOBRQ-UHFFFAOYSA-N	[H]C1=C([H])C([H])=C2C(=C1([H]))C([H])([H])C([H])([H])C2([H])([H])	Propyl sulfide	6.1746	FooDB=FDB003594,HMDB=HMDB31431,UNPD=UNPD160904	8118	ZERULLAPCVRMCO-UHFFFAOYSA-N	[H]C([H])([H])C([H])([H])C([H])([H])SC([H])([H])C([H])([H])C([H])([H])[H]	90.98283 14;	0.0280232	0.0319252	0.0326769	0.0290393	0.0281966	0.0368819	0.0284185	0.0312822	0	0.0298603	0.0327045	0.031011	0.0211847	0.0181731	0.023314	0.0219119	0.0253387	0.0306368	0.0211729	0	0.019851	0.0239375	0	0.0285794	0.032213	0.0229284	0.0261983	0.026946	0.0191188	0.0196061	0.0257314	0.0223351	0.0270056
261_RPNEG	8.49	297.134	[M-H]-	CHEBI:82266	6.8039	ChEBI=CHEBI:82266	5796	WABPPBHOPMUJHV-UHFFFAOYNA-N	[H]C1=C([H])C=2OC([H])([H])OC=2(C([H])=C1(OC([H])(OC([H])([H])C([H])([H])OC([H])([H])C([H])([H])OC([H])([H])C([H])([H])[H])C([H])([H])[H]))	HMDB37560	6.5494	FooDB=FDB016642,HMDB=HMDB37560,UNPD=UNPD13488; UNPD94135	-1	QNKGXSIDHDDDHD-UHFFFAOYNA-N	[H]OC([H])([H])C34(C([H])(OC2([H])(C([H])(O[H])C([H])([H])C3(C([H])([H])[H])(C12(OC1([H])([H])))))C([H])=C(C([H])([H])[H])C([H])(O[H])C4([H])(O[H]))	87.54272 32;89.13806 67;97.34067 172;101.31404 568;103.29604 72;111.97864 24;113.19518 134;113.85815 11;115.23069 32;127.35198 141;131.21252 87;133.29752 53;143.27908 41;145.15347 41;157.31293 11;160.14948 12;161.06828 91;163.2321 6050;164.09624 41;179.35069 14;201.30902 10;211.39023 11;219.10312 24;225.18021 24;226.97672 18;236.39062 13;237.18338 19;257.32251 11;261.53687 19;279.08203 195;	0.00201787	0.00151146	0.00179401	0.00200199	0.00186558	0.00200258	9.42355e-05	0.00136116	0.00735291	0.0075915	0.0146867	0.0130309	0.00560126	0.00280148	0.00166862	0.00791268	0.00178188	0.0089828	0.0105255	0.00581995	0.00224264	0.00469176	0.00548083	0.00950809	0.0111307	0.0101265	0.00828404	0.0110742	0.00489136	0.00419742	0.00870046	0.00739715	0.00827391
51_HilicNeg	7.46	297.134	[M-H]-	CHEBI:82266	6.7981	ChEBI=CHEBI:82266	5796	WABPPBHOPMUJHV-UHFFFAOYNA-N	[H]C1=C([H])C=2OC([H])([H])OC=2(C([H])=C1(OC([H])(OC([H])([H])C([H])([H])OC([H])([H])C([H])([H])OC([H])([H])C([H])([H])[H])C([H])([H])[H]))	HMDB36159	6.5797	FooDB=FDB015012,HMDB=HMDB36159,KNApSAcK=C00012637,T3DB=T3D3714,UNPD=UNPD155691	-1	ZAXZBJSXSOISTF-UHFFFAOYNA-N	[H]OC([H])([H])C34(C([H])([H])C([H])(O[H])C(=C([H])C4([H])(OC2([H])(C([H])(O[H])C([H])(O[H])C3(C([H])([H])[H])(C12(OC1([H])([H]))))))C([H])([H])[H])	85.44428 124;87.31311 261;89.30097 1407;97.36798 1525;99.82136 147;101.23648 22544;102.82235 537;103.45043 1169;113.32211 5740;114.02795 82;115.23508 3469;116.1495 113;119.34381 349;125.36504 97;127.30733 2068;130.64667 342;131.25179 5872;132.08356 105;133.3853 736;143.30627 2423;145.13345 2868;146.83951 113;149.1951 346;161.15189 6254;163.22824 278026;164.18637 670;175.26718 152;189.41994 111;19…	0.133699	0.136854	0.154621	0.16723	0.129067	0.131179	0.143451	0.144913	0	0.174093	0.159258	0.138953	0.107425	0.0386218	0.0180068	0.0949225	0.135049	0.101587	0.0642177	0	0.025419	0	0	0.12614	0.160881	0.1227	0.103487	0.0954614	0.0678907	0.0383802	0.104868	0.0716879	0.0632998
1175_RPNEG	13.7	448.302	[M-H]-	HMDB00637	6.7899	BMDB=BMDB00637; BMDB00708; BMDB06898,ChEBI=CHEBI:36252; CHEBI:36274,DrugBank=DB02123,FooDB=FDB024145; FDB022157,HMDB=HMDB00637; HMDB00708; HMDB06898,PubChem=9548796; 12544,SMPDB=PW_C000496,UNPD=UNPD19783; UNPD35847; UNPD83415	12310288	GHCZAUBVMUEKKP-AHBZRTSYSA-N	[H]OC(=O)C([H])([H])N([H])C(=O)C([H])([H])C([H])([H])C([H])(C([H])([H])[H])C2([H])(C([H])([H])C([H])([H])C3([H])(C4([H])(C([H])(O[H])C([H])([H])C1([H])(C([H])([H])C([H])(O[H])C([H])([H])C([H])([H])C1(C([H])([H])[H])C4([H])(C([H])([H])C([H])([H])C23(C([H])([H])[H]))))))	HMDB00631	6.7653	BMDB=BMDB00631,ChEBI=CHEBI:27471; CHEBI:82982,FooDB=FDB022152,HMDB=HMDB00631,KNApSAcK=C00030411,SMPDB=PW_C000491,UNPD=UNPD115036; UNPD125904	3035026	WVULKSPCQVQLCU-ZMBDPXIHSA-N	[H]OC(=O)C([H])([H])N([H])C(=O)C([H])([H])C([H])([H])C([H])(C([H])([H])[H])C2([H])(C([H])([H])C([H])([H])C3([H])(C4([H])(C([H])([H])C([H])([H])C1([H])(C([H])([H])C([H])(O[H])C([H])([H])C([H])([H])C1(C([H])([H])[H])C4([H])(C([H])([H])C([H])(O[H])C23(C([H])([H])[H]))))))	167.18655 20;310.67664 11;330.12512 41;355.23175 22;364.00235 28;368.07474 13;373.55054 12;384.08063 64;385.19485 298;386.25388 1081;387.18973 32;412.02875 17;430.17377 48;	0.000534465	0.000271435	0.00028563	0.000429548	0.000376485	0.000361348	0.00222117	0.000451167	0.000774206	0.000559191	0.000323774	0.000315731	0.000601656	0.00182722	0.00305967	0.000566511	0.000455976	0.000526065	0.000268295	0.00119662	0.00127642	0.00204515	0.00125822	0.000453087	0	0.000519475	0.000297492	0	0.000430728	0.000537254	0.000405457	0.000535302	0
266_RPPOS	15.55	404.22	[M+H]+	DB07328	6.7705	DrugBank=DB07328,PubChem=11840913	11840913	USDCNOQKDUFKRD-IKGGRYGDSA-N	[H]C=1C([H])=C(C([H])=C([H])C=1C(=O)OC([H])([H])[H])N([H])C(=O)N([H])C([H])([H])C3([H])(N([H])C([H])(C(=O)N2C([H])([H])C([H])([H])C([H])([H])C2([H])C([H])([H])N([H])[H])C([H])([H])C3([H])([H]))	HMDB61087	4.601	HMDB=HMDB61087	-1	XFIRLPDGPAOZML-WNAAXNPUSA-N	[H]OC=1C([H])=C([H])C(=C([H])C=1(O[H]))C(C2=C([H])C([H])=C(OC([H])([H])C([H])([H])N(C([H])([H])[H])C([H])([H])[H])C([H])=C2([H]))=C(C3=C([H])C([H])=C([H])C([H])=C3([H]))C([H])([H])C([H])([H])[H]	127.25355 12;200.46185 10;221.42705 16;267.13773 11;278.10406 11;282.95123 33;313.4455 36;315.65613 11;318.04849 38;330.05139 37;331.20248 57;344.47015 28;352.73257 11;368.38641 15;372.98343 12;385.2171 41;387.08871 55177;387.86487 75;403.87192 32;	0.00368112	0.00301044	0.0034126	0.0052514	0.0038085	0.00368694	0.00548843	0.00393189	0.00418409	0.00481527	0.00352175	0.00311974	0.0247071	0.0443713	0.0252883	0.0142603	0.0112545	0.00879054	0.0540432	0.00480202	0.0629517	0.0445605	0.0309428	0.0262968	0.00421019	0.0233796	0.00672629	0.00817876	0.0358217	0.0400892	0.0050748	0.00358671	0.0128105
156_HilicPos	5.58	397.203	[M+H]+	pregnenolonsulfat	6.7662	BMDB=BMDB00774,ChEBI=CHEBI:35420,FooDB=FDB022235,HMDB=HMDB00774; HMDB60382,PubChem=105074	105074	DIJBBUIOWGGQOP-OZIWPBGVSA-N	[H]OS(=O)(=O)OC4([H])(C([H])([H])C3=C([H])C([H])([H])C1([H])(C([H])(C([H])([H])C([H])([H])C2(C([H])([H])[H])(C([H])(C(=O)C([H])([H])[H])C([H])([H])C([H])([H])C12([H])))C3(C([H])([H])[H])C([H])([H])C4([H])([H])))							118.88814 135;123.28233 16;133.12141 13;144.99515 11;159.05666 19;165.23691 25;167.06097 24;193.0995 18;198.99159 14;214.77621 24;223.12372 40;255.16544 21;262.92664 52;271.23904 34;281.23511 15;301.12994 17;310.15491 12;333.05685 29;351.17935 73;361.17294 42;379.09866 258;396.71799 15;	0.00169872	0.00182057	0.00181285	0.00179862	0.00162345	0.00208551	0.00172623	0.00186352	0	0.00170124	0.00182085	0.00181679	0.00122111	0.0010747	0.00129483	0.00128911	0.00149197	0.00172979	0.00128147	0	0.00116045	0.0013658	0	0.00160509	0.00168517	0.00137886	0.00144279	0.00142874	0.000953351	0.0009928	0.00150592	0.00127858	0.00150971
224_RPPOS	17.41	340.358	[M+H]+	Docosanamide	6.7658	BMDB=BMDB00583,FooDB=FDB022129,HMDB=HMDB00583,STOFF=SI00007983	76468	ORAWFNKFUWGRJG-UHFFFAOYSA-N	[H]N([H])C(=O)C([H])([H])C([H])([H])C([H])([H])C([H])([H])C([H])([H])C([H])([H])C([H])([H])C([H])([H])C([H])([H])C([H])([H])C([H])([H])C([H])([H])C([H])([H])C([H])([H])C([H])([H])C([H])([H])C([H])([H])C([H])([H])C([H])([H])C([H])([H])C([H])([H])[H]							99.19806 115;109.15724 11;112.64026 12;136.01865 16;155.21294 3827;155.86545 27;167.14279 13;181.0206 11;186.36197 1584;187.46075 34;194.2023 30;199.925 19;208.04965 18;241.24774 12;243.37225 13;253.22253 16;257.7504 15;259.46014 17;263.09918 12;266.63184 13;274.03558 23;280.21075 10;322.37445 41;323.08493 15;332.48984 18;	0.000294068	0.000379708	0.000308452	0.000368657	0.00032014	0.000249815	4.63331e-05	0.000378435	0.000394663	0.000262696	0.000264957	0.000289859	0.000244088	0.000320934	0.000179025	0.000160746	0.000241887	0.000146524	0.000204305	0.000351449	0.000196215	0.00017135	0.000181069	0.000180435	0.000201934	0.000576241	0.000320013	0.00035172	0.000337967	0.000599885	0.000593561	0.000374663	0.000387713
344_RPPOS	20.64	482.324	[M+H]+	HMDB11130	6.7654	BMDB=BMDB11130,ChEBI=CHEBI:83047; CHEBI:75036,FooDB=FDB027909,HMDB=HMDB11130,YMDB=YMDB01204	9547068	BBYWOYAFBUOUFP-JOCHJYFZSA-N	[H]OC([H])(C([H])([H])OC(=O)C([H])([H])C([H])([H])C([H])([H])C([H])([H])C([H])([H])C([H])([H])C([H])([H])C([H])([H])C([H])([H])C([H])([H])C([H])([H])C([H])([H])C([H])([H])C([H])([H])C([H])([H])C([H])([H])C([H])([H])[H])C([H])([H])OP(=O)(O[H])OC([H])([H])C([H])([H])N([H])[H]	HMDB10381	6.5107	BMDB=BMDB10381,FooDB=FDB027532,HMDB=HMDB10381,UNPD=UNPD24711	24779458	RJZVWDTYEWCUAR-JOCHJYFZSA-N	[H]OC([H])(C([H])([H])OC(=O)C([H])([H])C([H])([H])C([H])([H])C([H])([H])C([H])([H])C([H])([H])C([H])([H])C([H])([H])C([H])([H])C([H])([H])C([H])([H])C([H])([H])C([H])([H])C([H])([H])[H])C([H])([H])OP(=O)([O-])OC([H])([H])C([H])([H])[N+](C([H])([H])[H])(C([H])([H])[H])C([H])([H])[H]	207.18562 12;227.00497 14;271.15005 19;282.94244 61;294.95984 12;299.99628 14;301.05643 11;341.27301 1588;342.1571 13;343.35492 19;351.80994 30;353.9202 12;362.95413 22;363.88251 13;368.43988 18;399.56497 24;446.81149 32;453.10001 42;464.57156 302;465.2955 418;466.96561 27;468.06674 12;471.6983 12;	0.000165592	0.000190398	0	0	7.11981e-05	0	0.0002814	0	0.000191605	0	0	0	0.000242575	0.000284174	0	3.74412e-06	0	0	6.1977e-06	0.000126809	5.46149e-05	0.000254585	0.000340533	0.000120789	0	0.000275131	0.000256089	0.00026421	0.000246172	0	0.000129733	0.000419112	0
357_RPPOS	18.42	496.34	[M+H]+	HMDB10382	6.7475	BMDB=BMDB10382,ChEBI=CHEBI:72998; CHEBI:28468,FooDB=FDB027533,HMDB=HMDB10382,PubChem=86554,SMPDB=PW_C006391,UNPD=UNPD14479,YMDB=YMDB01179	460602	ASWBNKHCZGQVJV-HSZRJFAPSA-N	[H]OC([H])(C([H])([H])OC(=O)C([H])([H])C([H])([H])C([H])([H])C([H])([H])C([H])([H])C([H])([H])C([H])([H])C([H])([H])C([H])([H])C([H])([H])C([H])([H])C([H])([H])C([H])([H])C([H])([H])C([H])([H])[H])C([H])([H])OP(=O)([O-])OC([H])([H])C([H])([H])[N+](C([H])([H])[H])(C([H])([H])[H])C([H])([H])[H]	CHEBI:78101	6.4975	ChEBI=CHEBI:78101	10553288	HEALIQQDEGDSLS-XMMPIXPASA-N	[H]C([H])([H])C(=O)OC([H])(C([H])([H])OC([H])([H])C([H])([H])C([H])([H])C([H])([H])C([H])([H])C([H])([H])C([H])([H])C([H])([H])C([H])([H])C([H])([H])C([H])([H])C([H])([H])C([H])([H])C([H])([H])[H])C([H])([H])OP(=O)([O-])OC([H])([H])C([H])([H])[N+](C([H])([H])[H])(C([H])([H])[H])C([H])([H])[H]	165.93167 94;166.55959 12;176.89211 19;184.1306 28773;185.06294 91;198.96289 40;233.40552 24;237.03818 23;258.21875 49;263.18433 22;283.06906 51;313.39493 36;320.87933 19;357.21515 32;367.60199 18;372.43997 12;404.14407 19;408.56345 24;419.01651 37;421.24216 19;422.41745 18;424.90579 10;435.22031 13;437.29309 11;457.9299 53;460.23428 110;461.25705 26;468.55783 19;478.24417 19369;479.16977 71;487.…	0.00145579	0.00142116	0.00163096	0.00109765	0.00133904	0.00108965	0.00212035	0.00147888	0.00222618	0.00139331	0.00142166	0.0012437	0.0016632	0.0027142	0.00177616	0.00254973	0.00266352	0.0013299	0.00133498	0.00146322	0.00258191	0.00308444	0.00319748	0.0025162	0.00114064	0.00235653	0.00210018	0.00128754	0.00238846	0.00218653	0.00228269	0.00332289	0.00243177
470_RPPOS	20.02	766.533	[M+H]+	HMDB07951	6.7125	BMDB=BMDB07951,HMDB=HMDB07951	52922332	UJMUDAMKHIWLCZ-OTHSKKDYSA-N	[H]C(=C([H])C([H])([H])C([H])=C([H])C([H])([H])C([H])=C([H])C([H])([H])C([H])([H])C([H])([H])C(=O)OC([H])(C([H])([H])OC(=O)C([H])([H])C([H])([H])C([H])([H])C([H])([H])C([H])([H])C([H])([H])C([H])([H])C([H])([H])C([H])([H])C([H])([H])C([H])([H])C([H])([H])C([H])([H])C([H])([H])[H])C([H])([H])OP(=O)([O-])OC([H])([H])C([H])([H])[N+](C([H])([H])[H])(C([H])([H])[H])C([H])([H])[H])C([H])([H])C([H])=C([…	HMDB08494	6.6748	BMDB=BMDB08494,HMDB=HMDB08494	-1	LSYAJRTVZQKSRW-BPFCGSCHNA-N	[H]C(=C([H])C([H])([H])C([H])=C([H])C([H])([H])C([H])=C([H])C([H])([H])C([H])([H])C([H])([H])C(=O)OC([H])([H])C([H])(OC(=O)C([H])([H])C([H])([H])C([H])([H])C([H])([H])C([H])([H])C([H])([H])C([H])([H])C([H])([H])C([H])([H])C([H])([H])C([H])([H])C([H])([H])C([H])([H])C([H])([H])[H])C([H])([H])OP(=O)([O-])OC([H])([H])C([H])([H])[N+](C([H])([H])[H])(C([H])([H])[H])C([H])([H])[H])C([H])([H])C([H])=C([…	219.05394 55;220.9906 61;223.13629 11;235.23499 158;236.95059 11;245.09174 11;247.23518 227;251.27745 26;253.18533 14;254.68074 40;255.34981 140;261.2178 57;263.2135 35;264.5278 26;265.15509 120;267.17139 27;273.29413 22;275.3688 13;278.18909 13;279.27069 75;289.30707 83;291.20651 875;296.78165 34;299.27896 175;305.2428 37;306.53351 13;308.01007 13;309.04541 185;315.09421 28;317.06833 134;319.291…	0.00508016	0.00340704	0.00179966	0.00148908	0.0025887	0.00116757	0.000348095	0.000554615	0.00310156	0.000883748	0.000631396	0.00355945	0.00136134	0.000347988	0.000437877	0.00410818	0.00773012	0.00229732	0.000394998	0.000402851	0.000349201	0.000436364	0.000488014	0.000581236	0.00062341	0.000426133	0.00035955	0.00153308	0.000539451	0.0012198	0.00341007	0.00352013	0.001849
111_RPPOS	1.36	204.123	[M+H]+	HMDB00201	6.6688	BMDB=BMDB00201,ChEBI=CHEBI:73024; CHEBI:15960; CHEBI:57589,DrugBank=DB08842,FooDB=FDB021904,HMDB=HMDB00201,PubChem=439756; 7045767; 18230; 1,SMPDB=PW_C000129,UNPD=UNPD80983,YMDB=YMDB00351; YMDB00617	439756	RDHQFKQIGNGIED-UHFFFAOYNA-N	[H]C([H])([H])C(=O)OC([H])(C([H])([H])C(=O)[O-])C([H])([H])[N+](C([H])([H])[H])(C([H])([H])[H])C([H])([H])[H]	DB07989	5.3327	DrugBank=DB07989,PubChem=5288636	5288636	OVUHENJPIUQHLJ-MRVPVSSYSA-N	[H]ON(C(=O)C([H])([H])[H])C([H])(C(=O)OC([H])([H])[H])C([H])([H])C([H])(C([H])([H])[H])C([H])([H])[H]	60.52595 238;71.3287 33;84.11368 69;85.36366 3646;88.34708 23;89.5607 14;104.36235 22;112.159 13;122.27646 24;127.22081 44;128.3246 38;134.35471 36;144.13335 242;145.24136 1428;173.30559 40;181.05325 14;186.23839 108;187.12679 34;	0	0.000152833	0	0.000161154	6.27975e-05	0	0.000196488	0.00018135	0	0	0	0.000262465	0.000137933	0.000261431	0	0.000233935	0.000206044	0.000143342	0.000479779	0.000210342	0.000231877	0	0.000266468	0	0.000246857	0.000212412	0.000291587	0.000447598	0.000207872	0.000216289	0.000415231	0.000516353	0.000576506
455_RPPOS	20.54	688.521	[M+H]+	HMDB11204	6.667	BMDB=BMDB11204,HMDB=HMDB11204	52923876	RMEZSZVJIYBBIJ-MWXRYAQWSA-N	[H]C(OC([H])([H])C([H])(OC(=O)C([H])([H])C([H])([H])C([H])([H])C([H])([H])C([H])([H])C([H])([H])C([H])([H])C([H])=C([H])C([H])([H])C([H])([H])C([H])([H])C([H])([H])[H])C([H])([H])OP(=O)([O-])OC([H])([H])C([H])([H])[N+](C([H])([H])[H])(C([H])([H])[H])C([H])([H])[H])=C([H])C([H])([H])C([H])([H])C([H])([H])C([H])([H])C([H])([H])C([H])([H])C([H])([H])C([H])([H])C([H])([H])C([H])([H])C([H])([H])C([H])…	HMDB07928	6.665	BMDB=BMDB07928,HMDB=HMDB07928	-1	RGNREBXBINFRJY-CNJFTRQRNA-N	[H]C(OC([H])(C([H])([H])OC(=O)C([H])([H])C([H])([H])C([H])([H])C([H])([H])C([H])([H])C([H])([H])C([H])([H])C([H])=C([H])C([H])([H])C([H])([H])C([H])([H])C([H])([H])[H])C([H])([H])OP(=O)([O-])OC([H])([H])C([H])([H])[N+](C([H])([H])[H])(C([H])([H])[H])C([H])([H])[H])=C([H])C([H])([H])C([H])([H])C([H])([H])C([H])([H])C([H])([H])C([H])([H])C([H])([H])C([H])([H])C([H])([H])C([H])([H])C([H])([H])C([H])…	203.03992 14;213.98085 12;218.88602 198;220.6386 226;221.26698 629;223.17957 99;235.0419 32;239.04898 298;243.0135 22;248.7688 34;261.7131 14;263.74991 35;265.01001 862;266.58624 72;267.23492 123;283.09067 138;283.74091 31;299.69958 43;300.44849 20;301.11752 17;306.37885 38;309.06174 1418;311.30176 101;326.71899 228;327.39484 209;332.87207 19;344.97144 14;351.73779 38;352.95245 958;354.88153 20;3…	0.00165791	0.00177389	0.00157973	0.00249133	0.00182611	0.00162769	0.000917161	0.0013249	0.00275141	0.00227325	0.00214256	0.00235698	0.0018157	0.00132621	0.000713526	0.00109391	0.00201542	0.000810658	0.00183995	0.00305933	0.00097289	0.00136189	0.00120264	0.00159814	0.00157691	0.00181106	0.00156821	0.000677971	0.00136548	0.00126175	0.000994717	0.000575376	0.00128447
239_RPPOS	12.21	359.149	[M+H]+	HMDB36837	6.6607	ChEBI=CHEBI:3829; CHEBI:81144,FooDB=FDB015788,HMDB=HMDB36837,KNApSAcK=C00003417; C00050890,UNPD=UNPD113839; UNPD172942; UNPD216461	442015	AALLCALQGXXWNA-QJNFORGASA-N	[H]OC13(C([H])=C([H])C([H])(OC1(=O))C2([H])(C4(C([H])([H])[H])(C([H])([H])C([H])(OC(=O)C4([H])(C([H])([H])C([H])([H])C23(C([H])([H])[H])))C5=C([H])OC([H])=C5([H]))))	C00003662	6.5046	ChEBI=CHEBI:6949,KNApSAcK=C00003662,UNPD=UNPD97851	46173777	RJKLDOLOCIQYFS-QKCXVILVSA-N	[H]OC5=C([H])C([H])=C1C(OC([H])=C2C1([H])C(C([H])([H])[H])(C([H])([H])[H])C4([H])(C([H])([H])C3(O[H])(C([H])([H])C(=O)C2(O[H])C4([H])(C3([H])(O[H])))))=C5([H])	105.30657 112;109.35338 30;111.26237 24;127.2549 240;129.34505 63;133.22649 21;135.49779 22;145.10883 69;159.34473 19;164.9048 13;171.37701 15;173.04666 50;179.28229 13;191.27426 11;195.18481 80;200.19577 10;213.11588 15;219.07559 120;231.26773 87;248.38245 24;249.01736 383;251.07556 1080;266.3252 29;267.04865 297;279.15366 17;281.77658 16;341.12793 483;341.91302 30;	0	0	0	0	0	0	0	0	0	0	0	0	0	0	0	0	0	0	0	0	0	0	0	0	0	0	0	0	0	0	0	0	0
359_RPPOS	18.63	498.283	[M+H]+	CHEBI:75020	6.6514	ChEBI=CHEBI:75020,YMDB=YMDB01250	57689794	XIVOBOJQPNEUSC-UXHICEINSA-N	[H]OC(=O)C([H])(N([H])[H])C([H])([H])OP(=O)(O[H])OC([H])([H])C([H])(O[H])C([H])([H])OC(=O)C([H])([H])C([H])([H])C([H])([H])C([H])([H])C([H])([H])C([H])([H])C([H])([H])C([H])([H])C([H])([H])C([H])([H])C([H])([H])C([H])([H])C([H])([H])C([H])([H])C([H])([H])[H]							194.97308 32;199.41415 10;203.06253 21;283.19077 16;300.09692 21;313.32095 604;326.41486 23;344.03476 26;346.44769 10;357.05151 65;358.21671 77;370.4259 80;393.19095 248;409.19016 19;410.44412 14;413.15192 30;430.79468 16;432.73117 20;434.2197 24;438.1077 11;462.2912 26;479.99149 2970;481.17792 193;	9.88999e-07	8.41987e-05	2.38769e-05	0	4.5498e-05	0.000118425	0.000171393	0	0.000192696	0.000182595	4.34275e-05	0	0.000146967	0.000158495	7.91005e-05	0.000250251	0.000233844	7.78525e-05	3.05831e-05	6.44729e-06	0.000244497	0.000271044	0.00024284	0.000208515	0.000181602	0.000214243	0.000208329	2.94788e-05	0.000281468	0.000243997	0.000250103	0.000336727	0.000229497
46_HilicNeg	5.21	279.233	[M-H]-	linoleic acid	6.6495	BMDB=BMDB00673; BMDB06270,ChEBI=CHEBI:17351; CHEBI:75108; CHEBI:30245,HMDB=HMDB00673; HMDB06270,KNApSAcK=C00036669; C00001224,PlantCyc=LINOLEIC_ACID; CPD-8203,PubChem=5280450; 3931; 5460332; 25246006,SMPDB=PW_C000530,T3DB=T3D4928,UNPD=UNPD115691; UNPD66633; UNPD169133; UNPD114844; UNPD114460,YMDB=YMDB00884,STOFF=SI00000164	5280450	OYHQOLUKZRVURQ-HZJYTTRNSA-N	[H]OC(=O)C([H])([H])C([H])([H])C([H])([H])C([H])([H])C([H])([H])C([H])([H])C([H])([H])C([H])=C([H])C([H])([H])C([H])=C([H])C([H])([H])C([H])([H])C([H])([H])C([H])([H])C([H])([H])[H]	Bovinic acid	6.471	BMDB=BMDB03797; BMDB05047; BMDB05048,ChEBI=CHEBI:32798; CHEBI:36025; CHEBI:17539; CHEBI:38393,FooDB=FDB023609; FDB021827,HMDB=HMDB03797; HMDB05047; HMDB05048,PubChem=5280644,UNPD=UNPD25072; UNPD139398; UNPD198998	5280644	JBYXPOFIGCOSSB-GOJKSUSPSA-N	[H]OC(=O)C([H])([H])C([H])([H])C([H])([H])C([H])([H])C([H])([H])C([H])([H])C([H])([H])C([H])=C([H])C([H])=C([H])C([H])([H])C([H])([H])C([H])([H])C([H])([H])C([H])([H])C([H])([H])[H]	97.27534 13;123.26509 21;137.31952 15;205.65021 13;217.34799 11;222.94034 11;233.48288 35;235.29263 48;243.47144 63;258.35449 13;259.26474 146;261.24039 1668;261.93402 12;	0.00746511	0.00778723	0.00767768	0.00786659	0.00808223	0.00854653	0.00897546	0.00743736	0.000799817	0.00839804	0.00673746	0.00889971	0.0154789	0.0128029	0.0124864	0.0220903	0.0169223	0.0114767	0.009905	0	0.0121189	0	0.0375724	0.00624939	0.00977381	0.0164204	0.0119019	0.0226333	0.00892053	0.0191358	0.0141159	0.0109076	0.0205253
1331_RPNEG	20.28	653.3	[M-H]-	CHEBI:69720	6.6312	ChEBI=CHEBI:69720,UNPD=UNPD204270	56601463	RYJRDCDFSSCHGB-DXJVOVDISA-N	[H]C1=C([H])C([H])=C(C([H])=C1([H]))C(=O)OC2([H])(C6(OC(=O)C([H])([H])[H])(C([H])([H])C([H])(C([H])([H])[H])C([H])(OC(=O)C([H])([H])C([H])([H])[H])C6([H])(C([H])(OC(=O)C([H])([H])[H])C35(C([H])([H])OC2(C([H])([H])[H])C5([H])(C4([H])(C([H])(C([H])([H])C3([H])(OC(=O)C([H])([H])[H]))C4(C([H])([H])[H])(C([H])([H])[H])))))))	DB04391	5.643	DrugBank=DB04391,PubChem=46936965,UNPD=UNPD195615; UNPD72145	46936965	WZVRXEOKWMIDDV-FEUXNLHUSA-N	[H]N=C(N([H])[H])N([H])C([H])([H])C([H])([H])C([H])([H])C([H])([H])N([H])C(=O)C2([H])(N(C(=O)C([H])(N([H])C(=O)C([H])(O[H])C([H])([H])C1=C([H])C([H])=C(O[H])C([H])=C1([H]))C([H])(C([H])([H])[H])C([H])([H])C([H])([H])[H])C3([H])(C([H])([H])C([H])(OS(=O)(=O)O[H])C([H])([H])C([H])([H])C3([H])(C2([H])([H]))))	205.55556 18;285.1532 3458;347.06683 27;355.32159 355;367.18646 35;385.23163 562;417.16998 1093;432.03833 17;447.11115 33950;448.05872 304;471.14294 41;552.80804 52;568.86896 15;590.53876 16;593.37457 11;595.53204 11;623.15045 202;632.88678 18;	0.000937977	0.000979094	0.000529015	0	0.000489217	0	0.00299725	0	0.0019344	0.00217028	0.00259037	0.0019141	0.00141241	0.00168433	0.00165905	0.00223067	0.00160264	0.00199204	0.0022906	0.00207342	0.00207788	0.00185179	0.00195786	0.00194393	0.000678647	0.00140121	0.00129781	0.00100666	0.00155975	0.00184277	0.00184197	0.00144452	0.00199953
184_RPPOS	8.46	299.149	[M+H]+	HMDB36159	6.6271	FooDB=FDB015012,HMDB=HMDB36159,KNApSAcK=C00012637,T3DB=T3D3714,UNPD=UNPD155691	-1	ZAXZBJSXSOISTF-UHFFFAOYNA-N	[H]OC([H])([H])C34(C([H])([H])C([H])(O[H])C(=C([H])C4([H])(OC2([H])(C([H])(O[H])C([H])(O[H])C3(C([H])([H])[H])(C12(OC1([H])([H]))))))C([H])([H])[H])	HMDB37560	6.624	FooDB=FDB016642,HMDB=HMDB37560,UNPD=UNPD13488; UNPD94135	-1	QNKGXSIDHDDDHD-UHFFFAOYNA-N	[H]OC([H])([H])C34(C([H])(OC2([H])(C([H])(O[H])C([H])([H])C3(C([H])([H])[H])(C12(OC1([H])([H])))))C([H])=C(C([H])([H])[H])C([H])(O[H])C4([H])(O[H]))	135.32776 20;147.27072 23;153.23715 14;165.07663 89;167.15685 13;169.03825 10;183.24493 14;196.31978 13;209.40231 71;211.13367 42;212.06174 16;263.80972 52;269.18536 44;276.08926 40;280.93112 27;282.16837 82;299.23236 12;	0.0108297	0.0129933	0.0155545	0.0188095	0.0141073	0.0123497	0.0157162	0.0141634	0.0132529	0.0162362	0.0162989	0.0149394	0.0145026	0.00598005	0.00223546	0.0138631	0.0209173	0.01374	0.00900655	0.0178128	0.00416843	0.00585408	0.0132046	0.0222865	0.0164845	0.0180662	0.0153409	0.0137533	0.0104052	0.00767016	0.0130747	0.0113469	0.0119244
55_HilicNeg	5.09	311.296	[M-H]-	Arachidic acid	6.6251	BMDB=BMDB02212,ChEBI=CHEBI:28822; CHEBI:32360,HMDB=HMDB02212,KNApSAcK=C00001209,PlantCyc=ARACHIDIC_ACID,PubChem=10467,UNPD=UNPD75278,STOFF=SI00000130	10467	VKOBVWXKNCXXDE-UHFFFAOYSA-N	[H]OC(=O)C([H])([H])C([H])([H])C([H])([H])C([H])([H])C([H])([H])C([H])([H])C([H])([H])C([H])([H])C([H])([H])C([H])([H])C([H])([H])C([H])([H])C([H])([H])C([H])([H])C([H])([H])C([H])([H])C([H])([H])C([H])([H])C([H])([H])[H]	3D,7D,11D-Phytanic acid	6.5637	BMDB=BMDB00417; BMDB00553; BMDB00801,ChEBI=CHEBI:16285; CHEBI:37257,FooDB=FDB022252,HMDB=HMDB00417; HMDB00553; HMDB00801,PubChem=26840,SMPDB=PW_C000639,T3DB=T3D4454,UNPD=UNPD128110; UNPD14060	10380830	RLCKHJSFHOZMDR-GUDVDZBRSA-N	[H]OC(=O)C([H])([H])C([H])(C([H])([H])[H])C([H])([H])C([H])([H])C([H])([H])C([H])(C([H])([H])[H])C([H])([H])C([H])([H])C([H])([H])C([H])(C([H])([H])[H])C([H])([H])C([H])([H])C([H])([H])C([H])(C([H])([H])[H])C([H])([H])[H]	95.3951 12;149.07324 15;170.20984 75;179.50793 12;181.39598 26;183.18295 1160;184.26199 311;197.21339 68;198.34457 29;209.4035 14;211.12918 39;212.07617 17;213.29779 13;223.27628 171;225.53299 38;233.31339 45;239.26239 19;247.31311 50;249.42426 26;253.26614 42;279.40198 37;283.11914 11;289.41302 73;293.29388 340;	0.00270439	0.00326524	0.00281222	0.003226	0.00258517	0.00305511	0.00313015	0.0028287	0	0.00369488	0.00237354	0.00315757	0.00417075	0.00373378	0.00303847	0.00441546	0.00457771	0.00319402	0.00317594	0	0.00447261	0	0	0.00411861	0.000547083	0.00360478	0.00368313	0.000612679	0.00390768	0.00399478	0.00413673	0.00331859	0.00424444
291_HilicPos	6.19	746.572	[M+H]+	PE(22:0/14:1(9Z))	6.6249	BMDB=BMDB09482,HMDB=HMDB09482	52924717	QMQLZZVQOMZDCN-IQEWKVFESA-N	[H]OP(=O)(OC([H])([H])C([H])([H])N([H])[H])OC([H])([H])C([H])(OC(=O)C([H])([H])C([H])([H])C([H])([H])C([H])([H])C([H])([H])C([H])([H])C([H])([H])C([H])=C([H])C([H])([H])C([H])([H])C([H])([H])C([H])([H])[H])C([H])([H])OC(=O)C([H])([H])C([H])([H])C([H])([H])C([H])([H])C([H])([H])C([H])([H])C([H])([H])C([H])([H])C([H])([H])C([H])([H])C([H])([H])C([H])([H])C([H])([H])C([H])([H])C([H])([H])C([H])([H])…	PE(14:1(9Z)/22:0)	6.6235	BMDB=BMDB08874,HMDB=HMDB08874	52924152	BSVQKPRGDPWRBO-IQEWKVFESA-N	[H]OP(=O)(OC([H])([H])C([H])([H])N([H])[H])OC([H])([H])C([H])(OC(=O)C([H])([H])C([H])([H])C([H])([H])C([H])([H])C([H])([H])C([H])([H])C([H])([H])C([H])([H])C([H])([H])C([H])([H])C([H])([H])C([H])([H])C([H])([H])C([H])([H])C([H])([H])C([H])([H])C([H])([H])C([H])([H])C([H])([H])C([H])([H])C([H])([H])[H])C([H])([H])OC(=O)C([H])([H])C([H])([H])C([H])([H])C([H])([H])C([H])([H])C([H])([H])C([H])([H])C(…	324.28851 27;362.28595 51;371.6261 18;388.3031 42;450.08862 22;464.43756 13;478.24738 49;481.6842 57;482.61377 34;494.38116 11;500.1684 14;506.36768 10;508.23431 40;522.38544 15;547.12689 20;563.57709 14;603.48761 35;604.62811 288;605.51776 2123;624.89496 28;687.08746 30;687.77124 22;702.49042 18;703.36371 37;728.01752 20;	0.0036221	0.00364729	0.00343117	0.00311282	0.0026838	0.00200619	0.00316554	0.00461804	0	0.00339271	0.00362364	0.00345754	0.00305035	0.00362039	0.00437821	0.00360454	0.00319476	0.00458873	0.0020983	0	0.00363967	0.00388088	0	0.00381237	0.00517826	0.00370154	0.0046215	0.00512276	0.00569568	0.00451295	0.00427495	0.00443027	0.00482296
388_RPPOS	17.44	526.293	[M+H]+	HMDB11496	6.6164	BMDB=BMDB11496,ChEBI=CHEBI:72749,FooDB=FDB028212,HMDB=HMDB11496	53480945	TWBVHOYVCUOMJY-PAUXXPOVSA-N	[H]OC([H])([H])C([H])(OC(=O)C([H])([H])C([H])([H])C([H])=C([H])C([H])([H])C([H])=C([H])C([H])([H])C([H])=C([H])C([H])([H])C([H])=C([H])C([H])([H])C([H])=C([H])C([H])([H])C([H])=C([H])C([H])([H])C([H])([H])[H])C([H])([H])OP(=O)(O[H])OC([H])([H])C([H])([H])N([H])[H]	HMDB11526	6.4837	BMDB=BMDB11526,ChEBI=CHEBI:72747,FooDB=FDB028242,HMDB=HMDB11526	52925132	XEVRBOQZSXWGQO-PAUXXPOVSA-N	[H]OC([H])(C([H])([H])OC(=O)C([H])([H])C([H])([H])C([H])=C([H])C([H])([H])C([H])=C([H])C([H])([H])C([H])=C([H])C([H])([H])C([H])=C([H])C([H])([H])C([H])=C([H])C([H])([H])C([H])=C([H])C([H])([H])C([H])([H])[H])C([H])([H])OP(=O)(O[H])OC([H])([H])C([H])([H])N([H])[H]	155.22147 19;157.64615 12;161.27307 30;169.03294 16;177.61166 16;183.302 36;184.94257 29;187.09943 17;196.86084 17;199.12424 33;211.38245 20;213.23698 77;215.46846 15;217.36156 12;221.09636 12;222.95453 14;236.77711 16;243.10497 14;256.70929 11;265.23541 18;267.41876 49;269.17932 31;287.17999 11;293.20801 117;303.12555 17;311.1344 61;327.15747 118;342.93402 22;353.85767 47;354.92584 21;385.20264 …	0	0.000129524	0	0.000138144	5.35336e-05	0	0.000338773	0.000186412	0	0	0.000142465	0	0.000228028	0.000245023	0.000233451	0.000244369	0.000208955	0	0.000142047	0	0.000235297	0.000254573	0.000229599	0.00021468	0.000604075	0.000321418	0.000967855	0.00103935	0.000536575	0.00061616	0.000275407	0.000689181	0.000696388
179_RPPOS	4.6	298.097	[M+H]+	5'-S-Methyl-5'-thioadenosine	6.5863	BMDB=BMDB01173,ChEBI=CHEBI:17509,DrugBank=DB02282,ECMDB=ECMDB01173,FooDB=FDB022465,HMDB=HMDB01173,PlantCyc=5-METHYLTHIOADENOSINE,PubChem=439176; 688097; 149,SMPDB=PW_C000910,UNPD=UNPD27064; UNPD190794,YMDB=YMDB00178	439176	WUUGFSXJNOTRMR-IOSLPCCCSA-N	[H]OC1([H])(C([H])(OC([H])(C([H])([H])SC([H])([H])[H])C1([H])(O[H]))N3C([H])=NC=2C(=NC([H])=NC=23)N([H])[H])	HMDB37297	4.5412	FooDB=FDB016316,HMDB=HMDB37297	-1	XBYMZYWXQBJAJG-UHFFFAOYNA-N	[H]OC1=C([H])C([H])=C([H])C([H])=C1N3C(=O)OC2([H])(C3([H])(OC([H])(C([H])([H])O[H])C([H])(O[H])C2([H])(O[H])))	86.89383 25;94.33316 20;97.50421 125;103.55219 19;119.39035 10;124.33684 23;136.3299 10106;137.12383 38;145.30707 222;163.05774 433;175.21844 34;178.03433 10;179.42853 13;181.02876 12;193.09843 13;211.18869 17;222.20718 13;226.37625 13;229.90906 10;236.31293 21;237.12366 11;237.95343 15;260.01459 17;262.6445 31;263.30917 27;267.16656 10;275.06241 14;279.35724 42;280.24347 45;280.99268 39;288.25 1…	0.00069504	0.00050846	0.000573678	0.000878023	0.000630143	0.000495517	0.000944656	0.000756414	0.00109318	0.000839986	0.000891335	0.000938353	0.00263326	0.00217192	0.000855009	0.00193077	0.00242977	0.00124955	0.00297514	0.00165468	0.00218374	0.00208419	0.00207045	0.00259812	0.000624004	0.00399958	0.000984507	0.00225026	0.000967533	0.0012597	0.00179807	0.00167665	0.00128502
1285_RPNEG	17.8	524.277	[M-H]-	HMDB11496	6.5625	BMDB=BMDB11496,ChEBI=CHEBI:72749,FooDB=FDB028212,HMDB=HMDB11496	53480945	TWBVHOYVCUOMJY-PAUXXPOVSA-N	[H]OC([H])([H])C([H])(OC(=O)C([H])([H])C([H])([H])C([H])=C([H])C([H])([H])C([H])=C([H])C([H])([H])C([H])=C([H])C([H])([H])C([H])=C([H])C([H])([H])C([H])=C([H])C([H])([H])C([H])=C([H])C([H])([H])C([H])([H])[H])C([H])([H])OP(=O)(O[H])OC([H])([H])C([H])([H])N([H])[H]	HMDB11526	6.5625	BMDB=BMDB11526,ChEBI=CHEBI:72747,FooDB=FDB028242,HMDB=HMDB11526	52925132	XEVRBOQZSXWGQO-PAUXXPOVSA-N	[H]OC([H])(C([H])([H])OC(=O)C([H])([H])C([H])([H])C([H])=C([H])C([H])([H])C([H])=C([H])C([H])([H])C([H])=C([H])C([H])([H])C([H])=C([H])C([H])([H])C([H])=C([H])C([H])([H])C([H])=C([H])C([H])([H])C([H])([H])[H])C([H])([H])OP(=O)(O[H])OC([H])([H])C([H])([H])N([H])[H]	153.28723 58;163.58179 17;177.25633 50;191.32002 79;196.15251 286;205.35785 20;214.20335 322;217.48834 31;225.4082 13;229.28671 405;241.47485 12;245.28674 12;249.13098 96;283.26944 3097;297.56363 16;299.26166 19;309.35681 43;325.7749 27;327.21887 3716;344.93677 13;353.05084 14;379.60052 36;435.5097 18;437.20282 67;447.56091 12;450.45184 33;463.24402 47;464.2149 161;486.05231 21;488.38068 26;504.1…	0.00170959	0.000707393	0.000245492	0.0014838	0.000829256	0	0.00118044	0.00104044	0.00155669	0.00154365	0.00222412	0.00179481	0.00123928	0.00177122	0.00161486	0.00254126	0.00205623	0.00233925	0.0016293	0.00197158	0.00212053	0.0021649	0.00224285	0.00244311	0.00284976	0.00620166	0.00459811	0.00678624	0.00290769	0.00424519	0.00507485	0.00506023	0.0058258
172_HilicPos	7.46	438.3	[M+H]+	CHEMBL3262735	6.534	BMDB=BMDB11152,HMDB=HMDB11152	42607469	QYTPGOPLNFESQC-NUTQULCTSA-N	[H]OC([H])(C([H])([H])OC([H])=C([H])C([H])([H])C([H])([H])C([H])([H])C([H])([H])C([H])([H])C([H])([H])C([H])([H])C([H])([H])C([H])([H])C([H])([H])C([H])([H])C([H])([H])C([H])([H])C([H])([H])[H])C([H])([H])OP(=O)(O[H])OC([H])([H])C([H])([H])N([H])[H]	KNApSAcK:C00016560	6.1076	KNApSAcK=C00016560,PubChem=10094631,UNPD=UNPD88970	10094631	SVYIMXYKHRBHSG-UHFFFAOYNA-N	[H]OC5([H])(C([H])([H])C([H])(OC6([H])(C([H])([H])C([H])([H])C4(C([H])([H])[H])(C([H])(C([H])([H])C([H])([H])C3([H])(C([H])([H])C=2C1=C([H])C([H])=C([H])C([H])=C1N([H])C=2C34(C([H])([H])[H])))C56(C([H])([H])[H]))))C(O[H])(C([H])([H])[H])C([H])([H])[H])	180.93758 13;184.09808 21;266.32901 1061;270.87888 95;284.36203 3369;292.38519 16;297.39099 17;364.34692 210;365.9194 11;377.09497 28;395.147 43;420.19907 4966;	0.0006699	0.000482458	0.000451971	0.000122759	0.000985881	0.000344553	0.00044409	0.000595071	0	0.000559129	0.000761352	0.00046583	0.000911513	0.00105763	0.00161003	0.00102131	0.000936994	0.00124332	0.00082778	0	0.00103924	0.00107395	0	0.000996871	0.000702263	0.000995291	0.000687843	0.000729775	0.000917556	0.00085752	0.000798088	0.000707335	0.000660228
278_RPPOS	14.93	415.211	[M+H]+	HMDB37039	6.5319	FooDB=FDB016021,HMDB=HMDB37039,KNApSAcK=C00021453,UNPD=UNPD133812	-1	GYCBSZGIYPNYAB-UHFFFAOYNA-N	[H]OC4=C([H])C(O[H])=C(C(=O)OC1([H])(C([H])([H])C2(C([H])([H])[H])(C3([H])(C([H])([H])C(C([H])([H])[H])(C([H])([H])[H])C([H])([H])C3([H])(C([H])=C(C([H])=O)C12(OC([H])([H])[H]))))))C(=C4([H]))C([H])([H])[H]	HMDB39380	6.4773	FooDB=FDB018945,HMDB=HMDB39380,UNPD=UNPD25702	-1	ISKWRTCZWOXOOF-UHFFFAOYNA-N	[H]OC=4C([H])=C(OC([H])([H])[H])C([H])=C(C=4(C(=O)OC1([H])(C([H])([H])C2(C([H])([H])[H])(C3([H])(C([H])([H])C(C([H])([H])[H])(C([H])([H])[H])C([H])([H])C3([H])(C([H])=C(C([H])=O)C12(O[H])))))))C([H])([H])[H]	117.56836 91;119.30547 13713;120.075 51;125.88075 27;127.19473 1083;133.32919 1951;143.32874 32;145.27634 137;151.35016 469;157.32236 38;159.30367 28;171.244 49;173.25249 49;181.46594 42;183.04694 29;187.13327 13;193.34654 88;199.14584 205;209.3968 61;217.2984 45;225.74521 17;228.07124 53;229.04327 56;235.14743 55;240.81207 45;242.6113 28;246.55676 279;247.21509 463;251.23148 360;257.09558 13;258…	0.00748546	0.00728755	0.00657516	0.00824536	0.00747207	0.00776683	0.00471964	0.00526559	0.00790891	0.00765283	0.00907264	0.00833751	0.00502733	0.00191636	0.00100854	0.00385753	0.00845587	0.00483234	0.00215951	0.011547	0.00275665	0.00173386	0.00379787	0.00680491	0.00778608	0.00594733	0.00607757	0.00748926	0.00279599	0.00514572	0.00901569	0.0125393	0.00572513
71_RPNEG	7.41	173.082	[M-H]-	Octanedioic acid	6.5296	BMDB=BMDB00893,ChEBI=CHEBI:9300; CHEBI:76282,HMDB=HMDB00893,KNApSAcK=C00001204,PlantCyc=CPD0-1264,UNPD=UNPD12255	22494956	TYFQFVWCELRYAO-UHFFFAOYSA-N	[H]OC(=O)C([H])([H])C([H])([H])C([H])([H])C([H])([H])C([H])([H])C([H])([H])C(=O)O[H]	Pentanedioic acid, 2-propyl-	6.4581	ChEBI=CHEBI:80644,HMDB=HMDB60684,PubChem=134970,SMPDB=PW_C040548	134970	IFNXFIJXYVEYLF-UHFFFAOYNA-N	[H]OC(=O)C([H])([H])C([H])([H])C([H])(C(=O)O[H])C([H])([H])C([H])([H])C([H])([H])[H]	83.45532 31;89.39226 10;97.38107 18;111.32507 1074;146.6577 12;155.34406 11;	0.00273862	0.00253377	0.00288607	0.00303269	0.00296782	0.00364796	0.00391827	0.00472819	0.00354404	0.00251383	0.00337429	0.00318562	0.00504697	0.00409136	0.00348073	0.00615617	0.00646737	0.00648399	0.0036091	0.00449853	0.00493062	0.00495586	0.00459706	0.00390469	0.0028614	0.00344679	0.00314828	0.00441549	0.0024425	0.00257519	0.00445892	0.00357209	0.00409763
385_RPPOS	19.21	524.298	[M+H]+	CHEBI:52649	6.5219	ChEBI=CHEBI:52649; CHEBI:74617,YMDB=YMDB01258	9547099	JZWNYZVVZXZRRH-YFKVPUFHSA-N	[H]OC(=O)C([H])(N([H])[H])C([H])([H])OP(=O)(O[H])OC([H])([H])C([H])(O[H])C([H])([H])OC(=O)C([H])([H])C([H])([H])C([H])([H])C([H])([H])C([H])([H])C([H])([H])C([H])([H])C([H])=C([H])C([H])([H])C([H])([H])C([H])([H])C([H])([H])C([H])([H])C([H])([H])C([H])([H])C([H])([H])[H]	CHEBI:77342	6.4862	ChEBI=CHEBI:77342; CHEBI:77646	86289214	QQHKVAJCQFQGMF-YFKVPUFHSA-N	[H]OC(=O)C([H])(N([H])[H])C([H])([H])OP(=O)(O[H])OC([H])([H])C([H])(OC(=O)C([H])([H])C([H])([H])C([H])([H])C([H])([H])C([H])([H])C([H])([H])C([H])([H])C([H])=C([H])C([H])([H])C([H])([H])C([H])([H])C([H])([H])C([H])([H])C([H])([H])C([H])([H])C([H])([H])[H])C([H])([H])O[H]	168.28369 26;184.25797 28;186.42757 25;247.13644 10;253.99091 17;260.01697 12;265.24487 78;295.40002 20;296.30469 24;321.3985 13;339.27112 871;342.40771 31;352.61084 51;357.34375 21;371.31061 15;383.63281 20;393.04492 14;399.27502 17;401.35712 12;410.10175 37;411.01666 17;414.0498 26;417.68073 22;419.13794 459;435.18671 16;442.61041 12;445.81317 31;447.05121 19;459.20111 16;462.64392 84;463.25769…	0.000274939	0.000160561	0.000235091	0	0.000134118	0	0.000423622	0.000251185	0.000377382	0.000241451	0.00026233	0.000175507	0.000208702	0.000416933	0.00025934	0.000457615	0.000338995	0.000253679	0.000212214	0.00028078	0.000466348	0.00052894	0.000489979	0.00046813	0.000199673	0.000382142	0.000446204	0.000350514	0.000462976	0.000508465	0.000474016	0.000675535	0.000475499
70_RPPOS	1.3	162.112	[M+H]+	HMDB00062	6.5194	BMDB=BMDB00062,ChEBI=CHEBI:11060; CHEBI:16347; CHEBI:17126; CHEBI:3424; CHEBI:39547; CHEBI:51453,DrugBank=DB00583; DB02648,ECMDB=ECMDB00062,FooDB=FDB000571,HMDB=HMDB00062,PlantCyc=CARNITINE,PubChem=5970; 2724480; 10917; 288; 85; 10918,SMPDB=PW_C000044,T3DB=T3D2832,UNPD=UNPD143588; UNPD9107,YMDB=YMDB00188; YMDB00616,STOFF=SI00004699	288	PHIQHXFUZVPYII-UHFFFAOYNA-N	[H]OC([H])(C([H])([H])C(=O)[O-])C([H])([H])[N+](C([H])([H])[H])(C([H])([H])[H])C([H])([H])[H]	CHEBI:81389	4.7362	ChEBI=CHEBI:81389	3077	OLHQOJYVQUNWPL-UHFFFAOYSA-N	[H]N=C(N([H])[H])SC([H])([H])C([H])([H])C([H])([H])N(C([H])([H])[H])C([H])([H])[H]	56.49512 18;60.58922 259;71.81319 12;82.36694 54;83.23898 22;84.32372 83;85.47006 70;88.43875 100;90.27034 29;98.36501 42;100.30011 29;102.42744 270;103.28395 321;104.46547 51;130.35426 153;134.43816 15;144.2785 472;145.1843 15;	0.000460369	0.000564034	0.000642018	0.000333541	0.000530921	0.000654644	0.000781523	0.000563183	0.000511758	0.000498147	0.000580925	0.000378493	0.00102984	0.000751259	0.0010445	0.000907387	0.000853679	0.000832682	0.000830049	0.000449758	0.000590528	0.000710121	0.000801877	0.000763248	0.00214655	0.00135622	0.00214476	0.00148991	0.00115955	0.00119481	0.000737964	0.00108989	0.000794193
140_HilicPos	5.57	295.119	[M+H]+	HMDB39825	6.5193	FooDB=FDB019478,HMDB=HMDB39825,UNPD=UNPD21641	-1	UGWYLYUJRHPKJY-UHFFFAOYNA-N	[H]OC3([H])(C(=O)C(=C([H])[H])C2([H])(OC4(OC1([H])(C(=O)OC([H])([H])C([H])(C([H])([H])[H])C1([H])C34(C2([H])([H]))))(C([H])([H])[H])))							96.99297 76;99.15077 12;105.00299 36;127.20934 16;133.03638 740;149.01865 24;150.98782 97;218.94839 20;228.70514 14;234.92102 22;246.72067 14;249.23932 23;259.15277 41;277.00223 370;	0.00193621	0.00220193	0.0021926	0.00220301	0.00197487	0.00245586	0.00199799	0.00215639	0	0.00211789	0.00219905	0.00213004	0.00198216	0.00152986	0.00162915	0.00172261	0.00206614	0.00219901	0.00177934	0	0.00173573	0.00190038	0	0.0020934	0.0020164	0.00167913	0.00175889	0.00179133	0.00120069	0.0012868	0.00178004	0.00153218	0.00178271
1330_RPNEG	19.81	653.299	[M-H]-	CHEBI:69720	6.5099	ChEBI=CHEBI:69720,UNPD=UNPD204270	56601463	RYJRDCDFSSCHGB-DXJVOVDISA-N	[H]C1=C([H])C([H])=C(C([H])=C1([H]))C(=O)OC2([H])(C6(OC(=O)C([H])([H])[H])(C([H])([H])C([H])(C([H])([H])[H])C([H])(OC(=O)C([H])([H])C([H])([H])[H])C6([H])(C([H])(OC(=O)C([H])([H])[H])C35(C([H])([H])OC2(C([H])([H])[H])C5([H])(C4([H])(C([H])(C([H])([H])C3([H])(OC(=O)C([H])([H])[H]))C4(C([H])([H])[H])(C([H])([H])[H])))))))	DB04391	5.473	DrugBank=DB04391,PubChem=46936965,UNPD=UNPD195615; UNPD72145	46936965	WZVRXEOKWMIDDV-FEUXNLHUSA-N	[H]N=C(N([H])[H])N([H])C([H])([H])C([H])([H])C([H])([H])C([H])([H])N([H])C(=O)C2([H])(N(C(=O)C([H])(N([H])C(=O)C([H])(O[H])C([H])([H])C1=C([H])C([H])=C(O[H])C([H])=C1([H]))C([H])(C([H])([H])[H])C([H])([H])C([H])([H])[H])C3([H])(C([H])([H])C([H])(OS(=O)(=O)O[H])C([H])([H])C([H])([H])C3([H])(C2([H])([H]))))	205.48042 26;285.22247 1699;286.11368 24;302.81104 11;310.40369 16;347.20593 50;355.11731 173;367.10327 33;385.24951 202;417.06104 733;432.13379 18;447.11774 15874;447.99091 162;536.81909 13;548.51447 10;584.99231 26;617.52942 27;623.19611 79;633.07269 22;	0	0.00117449	0	0	0.000234898	0	0.00114506	0	0.00117081	0.00164975	0.00191685	0.00114239	0.00102411	0.000901131	0.00122046	0.00167942	0.00123782	0.00104968	0.00182699	0.00135831	0.000984827	0.0012631	0.00139619	0.00194063	0.000398406	0.000672728	0.000610265	0.000786256	0.000494182	0.000699751	0.00117342	0.000648574	0.00198063
256_HilicPos	5.44	702.539	[M+H]+	PE(P-16:0/18:1(9Z))	6.4842	BMDB=BMDB11342,ChEBI=CHEBI:84533,HMDB=HMDB11342	52925128	ZVVYJAAMWXATNY-PRWZWGSOSA-N	[H]OP(=O)(OC([H])([H])C([H])([H])N([H])[H])OC([H])([H])C([H])(OC(=O)C([H])([H])C([H])([H])C([H])([H])C([H])([H])C([H])([H])C([H])([H])C([H])([H])C([H])=C([H])C([H])([H])C([H])([H])C([H])([H])C([H])([H])C([H])([H])C([H])([H])C([H])([H])C([H])([H])[H])C([H])([H])OC([H])=C([H])C([H])([H])C([H])([H])C([H])([H])C([H])([H])C([H])([H])C([H])([H])C([H])([H])C([H])([H])C([H])([H])C([H])([H])C([H])([H])C([…	HMDB11341	6.4484	BMDB=BMDB11341,HMDB=HMDB11341	53480845	IMGJLLXZPUDFFN-NHGOJEJISA-N	[H]OP(=O)(OC([H])([H])C([H])([H])N([H])[H])OC([H])([H])C([H])(OC(=O)C([H])([H])C([H])([H])C([H])([H])C([H])([H])C([H])([H])C([H])([H])C([H])([H])C([H])([H])C([H])([H])C([H])=C([H])C([H])([H])C([H])([H])C([H])([H])C([H])([H])C([H])([H])C([H])([H])[H])C([H])([H])OC([H])=C([H])C([H])([H])C([H])([H])C([H])([H])C([H])([H])C([H])([H])C([H])([H])C([H])([H])C([H])([H])C([H])([H])C([H])([H])C([H])([H])C([…	220.90318 107;227.06552 53;239.22081 14;264.86179 187;267.39359 29;283.30103 75;296.94272 17;308.87244 131;315.40833 35;327.49854 16;353.0517 204;371.18542 13;377.00519 13;396.93573 94;408.23639 18;415.24518 141;422.86438 11;440.83356 31;447.05591 24;458.34991 11;459.20343 225;484.85699 53;503.20526 3217;505.56622 11;539.85211 16;569.7959 15;597.10907 17;606.04376 16;626.4162 19;666.47845 11;667.…	0.00135868	0.00143421	0.00139653	0.00151888	0.00186246	0.00144208	0.00195436	0.0011973	0	0.0018002	0.00189035	0.00176883	0.00151224	0.000766593	0.000772122	0.000843945	0.00104484	0.000526148	0.00133533	0	0.000965291	0.000713246	0	0.000481864	0.000968073	0.00102791	0.000811482	0.000542453	0.000952619	0.000982757	0.000575708	0.000680982	0
30_HilicNeg	20.58	210.028	[M-H]-	AC1NSDXH	6.482	BMDB=BMDB01511,ChEBI=CHEBI:17287; CHEBI:58092,ECMDB=ECMDB01511,FooDB=FDB022665,HMDB=HMDB01511,PlantCyc=CREATINE-P,PubChem=9548602,SMPDB=PW_C001164,UNPD=UNPD182701	9548602	DRBBFCLWYRJSJZ-UHFFFAOYSA-N	[H]N=C(N([H])P(=O)(O[H])O[H])N(C([H])([H])[H])C([H])([H])C(=O)O[H]							79.39483 307;97.40454 705;121.25232 73;174.28964 38;192.21593 575;192.89922 16;	0.000420235	0.000363535	0.000399431	0.000524069	0.000452117	0.000345986	0.00058585	0.000399083	0	0.00159399	0.000612854	0.000572243	0.0019594	0.00136706	0.00142027	0.00213857	0.00157628	0.000391777	0.00249589	0	0.00318416	0	0	0.00181834	0.00056918	0.00468071	0.000193193	0.00434904	0.00449512	0.00327431	0.00348842	0.00294106	0.000907323
136_RPNEG	12.53	229.144	[M-H]-	HMDB30143	6.4778	FooDB=FDB001951,HMDB=HMDB30143,KNApSAcK=C00040437; C00040438; C00040439; C00040440; C00040441; C00040442,UNPD=UNPD137690; UNPD78213; UNPD38033; UNPD96456; UNPD144929; UNPD145734; UNPD153644; UNPD49074	-1	VDWRKBZMQNPUOB-UHFFFAOYNA-N	[H]OC([H])([H])C2([H])(C([H])([H])OC1(OC([H])([H])C([H])(C([H])([H])C([H])([H])[H])C([H])([H])C1([H])([H]))C([H])([H])C2([H])(O[H]))	Corfree M 2	6.2291	BMDB=BMDB00623,ChEBI=CHEBI:4676; CHEBI:76273,FooDB=FDB022148,HMDB=HMDB00623,UNPD=UNPD31013,STOFF=SI00005927	12736	TVIDDXQYHWJXFK-UHFFFAOYSA-N	[H]OC(=O)C([H])([H])C([H])([H])C([H])([H])C([H])([H])C([H])([H])C([H])([H])C([H])([H])C([H])([H])C([H])([H])C([H])([H])C(=O)O[H]	153.26991 14;166.08801 12;167.33606 1324;168.01352 21;171.11739 41;189.11873 20;209.23987 99;211.27138 1732;	0	0	0	9.34674e-05	1.86935e-05	0	0.000891204	0.000269369	0.000754729	0.00085782	0.000844108	0.000911143	0.000891852	0.000934626	0.00096555	0.0015183	0.00126305	0.00192538	0.00102225	0.00104956	0.000864569	0.00126186	0.00110655	0.00119322	0.000887526	0.00102722	0.000954712	0.00126133	0.000793141	0.000804343	0.00121262	0.000879151	0.00107038
355_RPPOS	17.47	494.324	[M+H]+	HMDB10383	6.4693	BMDB=BMDB10383,ChEBI=CHEBI:73851; CHEBI:84752,FooDB=FDB027534,HMDB=HMDB10383,UNPD=UNPD157409,YMDB=YMDB01184; YMDB02210	24779461	LFUDDCMNKWEORN-ZXEGGCGDSA-N	[H]OC([H])(C([H])([H])OC(=O)C([H])([H])C([H])([H])C([H])([H])C([H])([H])C([H])([H])C([H])([H])C([H])([H])C([H])=C([H])C([H])([H])C([H])([H])C([H])([H])C([H])([H])C([H])([H])C([H])([H])[H])C([H])([H])OP(=O)([O-])OC([H])([H])C([H])([H])[N+](C([H])([H])[H])(C([H])([H])[H])C([H])([H])[H]							166.25002 14;181.13968 27;184.13469 10926;185.08116 63;227.57812 23;237.49509 11;239.93912 39;246.22079 26;251.80397 13;258.31418 93;273.15286 30;274.1524 12;308.39566 11;311.11786 102;311.95544 14;315.16156 14;319.33508 70;336.32953 15;344.47482 13;346.04996 71;347.41858 14;348.26605 47;354.94537 12;365.84137 20;375.00262 12;380.13739 49;381.96713 134;383.06253 28;384.19452 95;385.19339 71;386.0…	0.00137169	0.001031	0.0015757	0.000522114	0.00111267	0.00106285	0.00182637	0.00104983	0.00189874	0.00131874	0.00124941	0.000735096	0.00236518	0.00253313	0.00200487	0.00274202	0.00271332	0.000279756	0.00127096	0.00155344	0.00240481	0.00367319	0.00256002	0.00281353	0.00187703	0.00355961	0.00279042	0.00235483	0.0037765	0.00330797	0.00614289	0.00689936	0.00405376
75_HilicNeg	5.65	445.2	[M-H]-	Olmesartan	6.4602	ChEBI=CHEBI:48416,DrugBank=DB00275,HMDB=HMDB14420,PubChem=158781,SMPDB=PW_C008813,STOFF=SI00001266	158781	VTRAEEWXHOVJFV-UHFFFAOYSA-N	[H]OC(=O)C1=C(N=C(N1C([H])([H])C2=C([H])C([H])=C(C([H])=C2([H]))C=4C([H])=C([H])C([H])=C([H])C=4(C3=NN=NN3([H])))C([H])([H])C([H])([H])C([H])([H])[H])C(O[H])(C([H])([H])[H])C([H])([H])[H]	1o5r	5.7651	DrugBank=DB02830,PubChem=447546	447546	KCCUBLLGAMGDJL-HXUWFJFHSA-N	[H]OC([H])([H])C([H])(N1C([H])=NC(=C1([H]))C(=O)N([H])[H])C([H])([H])C([H])([H])N3C([H])=C([H])C=2C([H])=C([H])C(=C([H])C=23)N([H])C(=O)N([H])C([H])([H])C4=C([H])C([H])=C([H])C([H])=C4([H])	301.48746 12;355.1459 192;369.24026 20;385.23178 788;399.67587 11;403.22614 28;416.20367 11;427.28979 19;	0.0091818	0.0077747	0.00788394	0.0120284	0.00781588	0.00743684	0.0100428	0.00844103	0	0.0103358	0.00831868	0.00816711	0.0435536	0.0818928	0.0602121	0.0246917	0.0144305	0.0133792	0.140207	0	0.0893654	0	0	0.00943661	0.0083995	0.0551081	0.0162985	0.0169926	0.070895	0.117823	0.0129932	0.0301322	0.0091518
345_RPPOS	17.29	482.324	[M+H]+	HMDB10381	6.4582	BMDB=BMDB10381,FooDB=FDB027532,HMDB=HMDB10381,UNPD=UNPD24711	24779458	RJZVWDTYEWCUAR-JOCHJYFZSA-N	[H]OC([H])(C([H])([H])OC(=O)C([H])([H])C([H])([H])C([H])([H])C([H])([H])C([H])([H])C([H])([H])C([H])([H])C([H])([H])C([H])([H])C([H])([H])C([H])([H])C([H])([H])C([H])([H])C([H])([H])[H])C([H])([H])OP(=O)([O-])OC([H])([H])C([H])([H])[N+](C([H])([H])[H])(C([H])([H])[H])C([H])([H])[H]	HMDB11130	6.449	BMDB=BMDB11130,ChEBI=CHEBI:83047; CHEBI:75036,FooDB=FDB027909,HMDB=HMDB11130,YMDB=YMDB01204	9547068	BBYWOYAFBUOUFP-JOCHJYFZSA-N	[H]OC([H])(C([H])([H])OC(=O)C([H])([H])C([H])([H])C([H])([H])C([H])([H])C([H])([H])C([H])([H])C([H])([H])C([H])([H])C([H])([H])C([H])([H])C([H])([H])C([H])([H])C([H])([H])C([H])([H])C([H])([H])C([H])([H])C([H])([H])[H])C([H])([H])OP(=O)(O[H])OC([H])([H])C([H])([H])N([H])[H]	133.26738 19;166.19885 24;179.46149 12;184.17645 4755;185.12155 12;221.11533 11;227.67755 13;257.71988 11;265.22925 11;267.32126 23;283.39331 70;300.37799 37;308.46716 30;321.16748 29;332.20996 29;341.26849 36;362.91675 11;364.23727 22;373.92358 21;376.86914 18;382.23569 16;390.35831 12;393.33005 10;395.51758 18;405.11404 58;407.04657 32;410.24838 24;423.08011 12;424.17902 17;429.35776 15;445.263…	6.06429e-05	0	0	5.32694e-05	2.27825e-05	0	0	0.000118237	0.000117823	0	0.000127159	0	0	0.000169639	1.7713e-05	0.000160883	0.000200826	0.000158273	0.000136065	9.41854e-05	4.19205e-05	0.000217921	0	0.000192882	0	0.000159869	0.000180971	0	0.000213994	0.000159706	0.000307103	0.000324454	0.000167677
241_RPPOS	18.87	361.235	[M+H]+	CHEBI:65794	6.4536	ChEBI=CHEBI:65794	44584504	DFKHRBLZEJCJLU-CBYSXIAQSA-N	[H]C(OC(=O)C([H])([H])[H])=C1C([H])([H])C([H])([H])C([H])=C(C([H])([H])[H])C([H])([H])C2([H])(OC(=O)C1([H])C2([H])C([H])(C([H])([H])[H])C([H])([H])C([H])([H])C([H])=C(C([H])([H])[H])C([H])([H])[H])	CHEBI:63916	6.2925	ChEBI=CHEBI:63916,PubChem=5311181; 53394043; 10937300; 6435378,STOFF=SI00007496	5311181	HIFJCPQKFCZDDL-ACWOEMLNSA-N	[H]OC(=O)C([H])([H])C([H])([H])C([H])([H])C([H])=C1C([H])([H])C2([H])(C([H])([H])C([H])(O[H])C([H])(C([H])=C([H])C([H])(O[H])C([H])(C([H])([H])[H])C([H])([H])C#CC([H])([H])[H])C2([H])(C1([H])([H])))	109.38089 42;111.38611 11;127.2775 116;159.44308 19;188.06808 12;197.3723 11;206.95973 12;218.8551 17;243.50262 19;248.07336 178;249.24774 1902;275.64917 11;289.0383 31;289.91605 41;343.21143 16;	0	0	0	0	0	0	0	0	0	0	0	5.76849e-05	0	0	0	0	0	0	0	0	0	0	0	0	0	0	0	0	0	0	0	0	0
948_RPNEG	15.64	421.154	[M-H]-	CHEBI:69039	6.4536	ChEBI=CHEBI:69039	70697716	UGEGARJXBCPKLR-OLDVFUJYSA-N	[H]OC4([H])(C([H])(OC2=C3OC(=O)C([H])=C([H])C3(=C([H])C1=C2(OC([H])(C1([H])([H]))C(O[H])(C([H])([H])[H])C([H])([H])[H])))OC([H])(C([H])([H])C([H])([H])[H])C([H])(O[H])C4([H])(O[H]))	HMDB32853	6.1539	FooDB=FDB010830,HMDB=HMDB32853	-1	USJIZVPRNYRDEY-UHFFFAOYNA-N	[H]OC([H])([H])C3([H])(OC([H])(OC1=C([H])C=2OC(=O)C(=C([H])C=2(C([H])=C1(OC([H])([H])[H])))C(C([H])=C([H])[H])(C([H])([H])[H])C([H])([H])[H])C([H])(O[H])C([H])(O[H])C3([H])(O[H]))	290.92969 11;315.33115 11;321.28009 42;337.03833 28;341.00549 20;345.14136 13;350.97382 37;352.94839 15;355.25073 34;361.05869 25;385.17407 488;385.78546 23;393.20786 23;400.9295 77;	0.00702305	0.00643938	0.00564568	0.00733022	0.00692865	0.00820491	0.0408641	0.00983445	0.0148859	0.00892028	0.00848948	0.00632109	0.0161205	0.0275617	0.0247639	0.0144455	0.00983059	0.0128337	0.00625925	0.0174989	0.0262624	0.0199752	0.017693	0.00684138	0.00593626	0.0115099	0.0199744	0.0145708	0.0311685	0.0366867	0.0086706	0.0152502	0.00645877
194_HilicPos	7.45	494.327	[M+H]+	1-(9Z-hexadecenoyl)-sn-glycero-3-phosphocholine	6.4433	BMDB=BMDB10383,ChEBI=CHEBI:73851; CHEBI:84752,FooDB=FDB027534,HMDB=HMDB10383,UNPD=UNPD157409,YMDB=YMDB01184; YMDB02210	24779461	LFUDDCMNKWEORN-ZXEGGCGDSA-N	[H]OC([H])(C([H])([H])OC(=O)C([H])([H])C([H])([H])C([H])([H])C([H])([H])C([H])([H])C([H])([H])C([H])([H])C([H])=C([H])C([H])([H])C([H])([H])C([H])([H])C([H])([H])C([H])([H])C([H])([H])[H])C([H])([H])OP(=O)([O-])OC([H])([H])C([H])([H])[N+](C([H])([H])[H])(C([H])([H])[H])C([H])([H])[H]							181.02982 83;184.06268 18662;185.10352 12;219.17526 15;240.04533 68;258.12436 69;270.09222 22;311.38141 198;322.3866 31;340.43674 272;349.43848 15;353.24783 118;417.24026 220;423.24802 11;433.09161 23;437.10172 11;449.5159 16;451.43323 45;476.23734 38911;476.85373 328;	0.00374415	0.00314062	0.00380236	0.00150956	0.00641354	0.00322748	0.00358754	0.00307664	0	0.00390457	0.00390567	0.00248764	0.00662648	0.00545541	0.00780722	0.00581848	0.00535163	0.00386274	0.00474961	0	0.0068774	0.00516951	0	0.00449491	0.00255767	0.00670635	0.0038936	0.00336727	0.00634392	0.00538515	0.00936345	0.00525702	0.00459172
459_RPPOS	21.7	702.537	[M+H]+	CHEBI:34085	6.4358	ChEBI=CHEBI:34085	5282291	ITQDKQBSRNKQCX-ZCXUNETKNA-N	[H]OP(=O)(OC([H])([H])C([H])(OC(=O)C([H])([H])C([H])([H])C([H])([H])C([H])([H])C([H])([H])C([H])([H])C([H])([H])C([H])=C([H])C([H])([H])C([H])([H])C([H])([H])C([H])([H])C([H])([H])C([H])([H])C([H])([H])C([H])([H])[H])C([H])([H])OC(=O)C([H])([H])C([H])([H])C([H])([H])C([H])([H])C([H])([H])C([H])([H])C([H])([H])C([H])([H])C([H])([H])C([H])([H])C([H])([H])C([H])([H])C([H])([H])C([H])([H])C([H])([H])…	HMDB11372	6.2632	BMDB=BMDB11372,HMDB=HMDB11372	52925074	NHHCZYWVBRHSSB-KHOLRTNESA-N	[H]OP(=O)(OC([H])([H])C([H])([H])N([H])[H])OC([H])([H])C([H])(OC(=O)C([H])([H])C([H])([H])C([H])([H])C([H])([H])C([H])([H])C([H])([H])C([H])([H])C([H])=C([H])C([H])([H])C([H])([H])C([H])([H])C([H])([H])C([H])([H])C([H])([H])[H])C([H])([H])OC([H])=C([H])C([H])([H])C([H])([H])C([H])([H])C([H])([H])C([H])([H])C([H])([H])C([H])([H])C([H])([H])C([H])([H])C([H])([H])C([H])([H])C([H])([H])C([H])([H])C([…	205.22174 28;208.19868 66;218.63028 182;219.33861 131;220.52841 267;221.19708 1591;223.16434 152;223.76904 38;239.26996 222;248.96992 18;262.04492 45;262.80847 19;263.83566 54;264.97253 1069;266.01016 160;267.02582 246;283.01953 748;283.97717 35;307.11404 80;309.05469 2930;310.15936 19;311.16119 13;314.63196 49;315.26257 36;327.22531 743;352.84955 1405;353.45764 177;355.13965 251;356.95081 11;358…	0.00223397	0.00034403	0.00211556	0.0031843	0.00199778	0.00211106	0.000897404	0.00168519	0.00122527	0.00296244	0.00258283	0.00275006	0.00241355	0.000804237	0.000849624	0.00145756	0.00258574	0.00107379	0.00203611	0.00372174	0.00122276	0.00207209	0.000531033	0.00203258	0.00212192	0.00262985	0.00199518	0.000891667	0.00170166	0	0.00136867	0.000780654	0.00190148
84_HilicNeg	7.46	580.363	[M-H]-	CHEBI:79274	6.4354	ChEBI=CHEBI:78369; CHEBI:79274	86289861	ZSRRCEDBZQNHMN-AREMUKBSSA-N	[H]OC(=O)C([H])([H])C([H])([H])C(=O)OC([H])(C([H])([H])OC([H])([H])C([H])([H])C([H])([H])C([H])([H])C([H])([H])C([H])([H])C([H])([H])C([H])([H])C([H])([H])C([H])([H])C([H])([H])C([H])([H])C([H])([H])C([H])([H])C([H])([H])C([H])([H])[H])C([H])([H])OP(=O)([O-])OC([H])([H])C([H])([H])[N+](C([H])([H])[H])(C([H])([H])[H])C([H])([H])[H]							265.11426 11;281.24194 606;308.12622 13;356.33044 18;417.49396 10;433.27771 22;493.22015 67;496.26367 15;506.16693 60569;506.85168 168;521.28638 363;528.42194 58;530.31732 126;547.90887 18;562.11572 40;	0.00273523	0.00261831	0.00280675	0.00105226	0.00415281	0.0016184	0.00298833	0.00269961	0	0.0031355	0.00251385	0.00197305	0.00266385	0.00365455	0.00476884	0.00446126	0.00286205	0.00391379	0.00189798	0	0.00427179	0	0	0.00395039	0.00260516	0.00278276	0.00309597	0.00199044	0.00332771	0.00322016	0.0054217	0.00315267	0.00331078
186_HilicPos	7.45	468.311	[M+H]+	buprenorphine	6.4317	ChEBI=CHEBI:3216; CHEBI:652822,DrugBank=DB00921,HMDB=HMDB60547; HMDB15057,PubChem=644073,SMPDB=PW_C009368,T3DB=T3D2932,STOFF=SI00002908	644073	RMRJXGBAOAMLHD-IHFGGWKQSA-N	[H]OC=7C([H])=C([H])C6=C2C=7(OC3([H])(C1(OC([H])([H])[H])(C([H])([H])C([H])([H])C4(C([H])([H])C1([H])(C(O[H])(C([H])([H])[H])C(C([H])([H])[H])(C([H])([H])[H])C([H])([H])[H]))(C([H])(N(C([H])([H])C([H])([H])C234)C([H])([H])C5([H])(C([H])([H])C5([H])([H])))C6([H])([H])))))	1-Myristoyl-sn-glycero-3-phosphocholine	6.2912	BMDB=BMDB10379,ChEBI=CHEBI:64489,FooDB=FDB027530,HMDB=HMDB10379,SMPDB=PW_C006388,UNPD=UNPD67678,YMDB=YMDB01175	460604	VXUOFDJKYGDUJI-OAQYLSRUSA-N	[H]OC([H])(C([H])([H])OC(=O)C([H])([H])C([H])([H])C([H])([H])C([H])([H])C([H])([H])C([H])([H])C([H])([H])C([H])([H])C([H])([H])C([H])([H])C([H])([H])C([H])([H])C([H])([H])[H])C([H])([H])OP(=O)([O-])OC([H])([H])C([H])([H])[N+](C([H])([H])[H])(C([H])([H])[H])C([H])([H])[H]	183.98929 375;293.98303 10;297.06659 24;303.26031 24;322.17538 21;331.15582 26;332.31049 11;364.40637 12;411.99692 31;424.35046 17;450.18112 1003;	0.00082809	0.000729264	0.000923825	0.000423529	0.00156758	0.000793921	0.000945524	0.000784097	0	0.000965792	0.000959477	0.000653389	0.0018655	0.00157275	0.0020821	0.00154803	0.00143293	0.00110792	0.00148115	0	0.00213116	0.00162658	0	0.00139633	0.000744444	0.00183632	0.00113765	0.000936547	0.0017755	0.00152696	0.00241069	0.00140097	0.00117407
65_HilicNeg	5.65	355.168	[M-H]-	CHEBI:70516	6.4191	ChEBI=CHEBI:70516,UNPD=UNPD194000; UNPD13359	50900051	GNCUCBQZLQLSOF-IGWMUPSQSA-N	[H]OC1=C([H])C([H])=C([H])C2=C1N([H])C3=C(C(=O)OC([H])([H])[H])C5([H])(C([H])([H])C4([H])(N(C([H])([H])C([H])([H])C234)C([H])([H])C5([H])(C([H])(O[H])C([H])([H])[H])))							120.89536 15;123.11871 12;139.3176 43;149.19766 8441;149.95074 138;153.35068 23;155.34991 26;171.4902 14;179.22198 16;181.30635 47;185.1321 12;205.27936 4675;206.13008 85;211.45111 19;220.63043 11;225.15378 20;227.28275 58;228.36411 19;229.23196 27;237.1846 49;238.40286 24;239.31113 58;243.49643 37;247.19144 27;249.20499 27;250.26041 28;251.2547 27;260.3927 14;264.74896 24;265.36285 22;267.19958 …	0.000457034	0.000466534	0	0.000774749	0	0.000432245	0	0	0	0	0	0	0.00324396	0.00585686	0.00421369	0.00214227	0.0015482	0	0.011211	0	0.00680386	0	0	0	0.00013878	0.00462052	0.000277816	0.00178953	0.00602486	0.00957617	0.00016749	0.00251413	0
123_RPPOS	2.34	218.139	[M+H]+	HMDB00824	6.418	BMDB=BMDB00824,ChEBI=CHEBI:28867; CHEBI:53210; CHEBI:53211,FooDB=FDB022268,HMDB=HMDB00824,PubChem=107738,SMPDB=PW_C000658,UNPD=UNPD152946	188824	UFAHZIUFPNSHSL-UHFFFAOYNA-N	[H]C([H])([H])C([H])([H])C(=O)OC([H])(C([H])([H])C(=O)[O-])C([H])([H])[N+](C([H])([H])[H])(C([H])([H])[H])C([H])([H])[H]							84.38504 22;85.50632 1491;88.26169 20;122.21211 27;126.98961 13;128.78339 43;144.25517 86;147.14816 42;148.79384 19;149.51939 12;158.06723 23;159.20952 810;160.04367 28;162.20274 51;176.92897 34;177.70392 11;183.07385 50;184.1557 42;190.23943 24;194.80212 130;200.26305 33;201.23436 241;217.78584 15;	0.000335605	0.000242957	0.000221014	0.000437321	0.000256975	4.7976e-05	0.000381032	0.000307191	0.000146811	0.000157584	0.000172657	0.000263778	0.000706206	0.000437151	2.36482e-05	0.000546777	0.000389665	0.000286021	0.000437617	0.000346147	0.000383911	0.000300768	0.000445523	0.000537272	5.92354e-05	0.000675034	0.000401508	0.000490548	0.000475465	0.000416946	0.00118641	0.000714846	0.000868802
19_RPPOS	19.39	118.086	[M+H]+	L-Valine	6.4105	BMDB=BMDB00883,ChEBI=CHEBI:57762; CHEBI:16414; CHEBI:27477; CHEBI:27266; CHEBI:32851; CHEBI:32852; CHEBI:32855; CHEBI:32856; CHEBI:32859; CHEBI:32860,DrugBank=DB00161,ECMDB=ECMDB00883,HMDB=HMDB00883,KNApSAcK=C00001398,PlantCyc=VAL,PubChem=6287; 1182,SMPDB=PW_C000704,T3DB=T3D4370,UNPD=UNPD88827,YMDB=YMDB00152; YMDB01000,STOFF=SI00001531	6287	KZSNJWFQEVHDMF-BYPYZUCNSA-N	[H]OC(=O)C([H])(N([H])[H])C([H])(C([H])([H])[H])C([H])([H])[H]	L-Norvaline	6.2677	ChEBI=CHEBI:18314; CHEBI:28804; CHEBI:19475; CHEBI:58441,DrugBank=DB03519,FooDB=FDB005441,HMDB=HMDB13716,PlantCyc=L-2-AMINOPENTANOIC-ACID,PubChem=65098,UNPD=UNPD58195,YMDB=YMDB00822,STOFF=SI00007181	65098	SNDPXSYFESPGGJ-BYPYZUCNSA-N	[H]OC(=O)C([H])(N([H])[H])C([H])([H])C([H])([H])C([H])([H])[H]	58.64059 12;59.55078 20;90.52399 11;100.41814 459;101.20741 16;	0.000854268	0.000339941	0.00100806	0.000246468	0.00053451	0.000223817	0.00118467	0.000764827	0.000987918	0.000972222	0.000237013	0.000816652	0.000871385	0.000741692	0.00104345	0.000973053	0.000642961	0.000584621	0.000740362	0.000969912	0.000962515	0.000540721	0.000259976	0.000202394	0.000509902	0.000697657	0.00124106	0.000982756	0.0013893	0.00113452	0.00120562	0.00105313	0.00107417
295_HilicPos	6	752.563	[M+H]+	PE(P-16:0/22:4(7Z,10Z,13Z,16Z))	6.4101	BMDB=BMDB11358,HMDB=HMDB11358	52925066	KHJSJYFSBVDACH-LNCIMUPZSA-N	[H]OP(=O)(OC([H])([H])C([H])([H])N([H])[H])OC([H])([H])C([H])(OC(=O)C([H])([H])C([H])([H])C([H])([H])C([H])([H])C([H])([H])C([H])=C([H])C([H])([H])C([H])=C([H])C([H])([H])C([H])=C([H])C([H])([H])C([H])=C([H])C([H])([H])C([H])([H])C([H])([H])C([H])([H])C([H])([H])[H])C([H])([H])OC([H])=C([H])C([H])([H])C([H])([H])C([H])([H])C([H])([H])C([H])([H])C([H])([H])C([H])([H])C([H])([H])C([H])([H])C([H])([…	HMDB09609	6.3899	BMDB=BMDB09609,HMDB=HMDB09609	53479905	CBTPUGMCCOFLJT-LNCIMUPZSA-N	[H]OP(=O)(OC([H])([H])C([H])([H])N([H])[H])OC([H])([H])C([H])(OC([H])=C([H])C([H])([H])C([H])([H])C([H])([H])C([H])([H])C([H])([H])C([H])([H])C([H])([H])C([H])([H])C([H])([H])C([H])([H])C([H])([H])C([H])([H])C([H])([H])C([H])([H])[H])C([H])([H])OC(=O)C([H])([H])C([H])([H])C([H])([H])C([H])([H])C([H])([H])C([H])=C([H])C([H])([H])C([H])=C([H])C([H])([H])C([H])=C([H])C([H])([H])C([H])=C([H])C([H])([…	229.20459 15;266.25558 11;361.32092 38;364.04736 79;365.16925 39;390.32202 34;392.2926 176;467.61963 33;491.85474 13;611.23352 47;679.25867 12;693.32672 32;734.89508 64;	0.000992286	0.000911527	0.000767686	0.000520996	0.000203222	0.00018724	2.64408e-05	0.00121544	0	0.000772197	0.00120172	0.000851162	9.23891e-05	0.000553285	0.000482843	0.0004557	0.000349343	0.000985685	7.15601e-05	0	0.000424531	0.000596623	0	0.000873173	0.000745915	0.000192694	0.000749946	0.000835383	0.000630596	0.00063576	9.98675e-05	0.000462783	5.97337e-05
206_RPPOS	17.69	319.225	[M+H]+	HMDB01337	6.4017	BMDB=BMDB01337,ChEBI=CHEBI:15651; CHEBI:57463,HMDB=HMDB01337,PlantCyc=CPD-8892,PubChem=5280383; 21158437,SMPDB=PW_C001030,UNPD=UNPD194965,YMDB=YMDB00264	5280383	UFPQIRYSPUYQHK-WAQVJNLQSA-N	[H]OC(=O)C([H])([H])C([H])([H])C([H])([H])C1([H])(OC1([H])(C([H])=C([H])C([H])=C([H])C([H])=C([H])C([H])([H])C([H])=C([H])C([H])([H])C([H])([H])C([H])([H])C([H])([H])C([H])([H])[H]))	CHEBI:63999	6.3589	ChEBI=CHEBI:63999,PubChem=56927912	56927912	WPAYHTRLEHKDHP-UBEAGDKLSA-N	[H]OC(=O)C([H])([H])C([H])([H])C([H])([H])C([H])=C([H])C([H])([H])C1([H])(C(=C([H])C([H])=C([H])C([H])([H])C([H])([H])C([H])([H])C([H])([H])C([H])([H])[H])C([H])=C([H])C1([H])(O[H]))	123.55193 17;161.52364 17;163.22488 25;165.30965 14;177.17755 10;178.26303 11;181.3414 16;185.31976 29;189.05817 10;191.35648 15;203.17194 33;215.40369 11;218.46295 10;226.5408 17;227.32251 14;232.33969 20;247.28757 27;257.2962 61;260.01422 39;261.31384 146;262.43597 16;264.31268 11;283.91742 18;295.5361 22;300.98236 41;302.24005 21;	0	0	0	6.20371e-06	1.24074e-06	0	0.000189777	0	0	0	0	0.000106867	0.00045362	0.00034926	0.000196105	0.000286896	0.000430981	0.000269933	0.000410053	2.29236e-05	0.000272748	0.000412703	0.00032209	0.00038607	0	0	0	0	5.18007e-05	0	0.000107551	1.80348e-05	0
163_RPPOS	15.69	281.138	[M+H]+	HMDB36695	6.3701	ChEBI=CHEBI:73231,FooDB=FDB015629,HMDB=HMDB36695,KNApSAcK=C00012420,PubChem=13993178,UNPD=UNPD156754; UNPD27459	13993178	JXXWNBNYEWOORY-KHTYUQOESA-N	[H]OOC2([H])(C1=C([H])C([H])([H])C3([H])(C(=C([H])[H])C(=O)OC3([H])(C([H])(O[H])C(C([H])([H])[H])(C1([H])([H]))C([H])([H])C2([H])([H]))))	HMDB36095	6.3593	ChEBI=CHEBI:20805; CHEBI:58490,FooDB=FDB014935,HMDB=HMDB36095,KNApSAcK=C00011541,PlantCyc=CPD-7234,PubChem=11954194; 25245404,UNPD=UNPD84358	11954194	AVFORCKFTWHFAR-ZSIFGTMLSA-N	[H]OC(=O)C([H])=C(C([H])=C([H])C1(O[H])(C(=C([H])C(=O)C([H])([H])C1(C([H])([H])[H])(C([H])([H])O[H]))C([H])([H])[H]))C([H])([H])[H]	85.37074 18;105.44892 26;107.45363 66;111.35826 66;119.31292 244;123.40015 14;124.3672 17;129.34518 69;134.26071 63;135.22694 803;147.29559 44;159.16762 22;165.29166 21;172.94505 52;187.1899 16;199.43509 14;210.28769 15;211.38354 29;217.09177 24;223.28546 34;262.95221 45;	0.000790864	0.000775782	0.000891524	0.000868486	0.000807713	0.000711907	0.00100377	0.000947402	0.000650838	0.00078222	0.000918403	0.000914867	0.000618504	0.000619791	0.000698165	0.00076721	0.000703701	0.000741816	0.000354248	0.0011041	0.000667629	0.000928887	0.00100984	0.000776017	0.00142639	0.000605157	0.00106109	0.00108907	0.000624877	0.000683762	0.000634456	0.00107766	0.00104729
238_RPPOS	14.56	358.228	[M+H]+	HMDB32718	6.3659	FooDB=FDB010679,HMDB=HMDB32718	10893678	DMIKQRDDTCGOLE-VTKKNFPDSA-N	[H]OC(=NC([H])([H])C([H])(C([H])([H])[H])C([H])([H])[H])C([H])=C([H])C([H])=C([H])C([H])([H])C([H])([H])C([H])([H])C([H])([H])C([H])([H])C([H])([H])C=1C([H])=C([H])C=2OC([H])([H])OC=2(C=1([H]))	Ditropan	6.1018	ChEBI=CHEBI:7857; CHEBI:51330; CHEBI:7856; CHEBI:51329,DrugBank=DB01062,HMDB=HMDB15195,PubChem=4634,STOFF=SI00004397	657224	XIQVNETUBQGFHX-UHFFFAOYNA-N	[H]OC(C(=O)OC([H])([H])C#CC([H])([H])N(C([H])([H])C([H])([H])[H])C([H])([H])C([H])([H])[H])(C1=C([H])C([H])=C([H])C([H])=C1([H]))C2([H])(C([H])([H])C([H])([H])C([H])([H])C([H])([H])C2([H])([H]))	107.83008 20;120.37988 26;122.32769 32;130.88606 14;132.10529 10;134.27484 66;135.45383 50;139.20813 11;153.30453 21;156.11723 16;163.09888 28;165.32626 37;170.35703 21;178.1756 13;179.07712 19;180.14354 12;182.4238 10;184.12527 65;192.38484 49;193.12601 21;194.26234 271;195.10101 77;196.12405 17;202.394 18;203.37625 24;207.01788 98;208.32146 183;209.38611 174;210.16029 96;215.08002 15;218.01562 …	0.00129654	0.00179429	0.00105162	0.00205124	0.00147402	0.00117642	0	0.00124611	0.00217584	0.00122348	0.00120011	0.00132759	0	0	0	0	0	0	0	0.00144424	0	0	0	0	0.000292794	0.00090634	0.000498285	0.000312888	0.000506091	0.000347993	0.000562112	0.000329118	0.000475306
311_RPPOS	17.13	452.277	[M+H]+	HMDB11504	6.3627	BMDB=BMDB11504,FooDB=FDB028220,HMDB=HMDB11504,YMDB=YMDB01201	90657370	DSOWUEHXZJUNID-WHXUGTBJSA-N	[H]OC([H])(C([H])([H])OC(=O)C([H])([H])C([H])([H])C([H])([H])C([H])([H])C([H])([H])C([H])([H])C([H])([H])C([H])=C([H])C([H])([H])C([H])([H])C([H])([H])C([H])([H])C([H])([H])C([H])([H])[H])C([H])([H])OP(=O)(O[H])OC([H])([H])C([H])([H])N([H])[H]	HMDB35366	6.3405	FooDB=FDB014039,HMDB=HMDB35366,KNApSAcK=C00011340,UNPD=UNPD37534	-1	UMHVFKLUODBPSC-JUDANRDHNA-N	[H]OC2=NC([H])(C([H])([H])C1=C([H])C([H])=C([H])C([H])=C1([H]))C4([H])(C(=C(C([H])([H])[H])C([H])(O[H])C3([H])(C([H])=C([H])C([H])([H])C([H])(C([H])([H])[H])C([H])([H])C(O[H])(C([H])=C([H])C([H])(O[H])C234)C([H])([H])[H]))C([H])([H])[H])	233.36969 16;237.38324 18;239.11063 12;265.73898 11;280.20523 42;294.22696 14;296.4274 16;298.11761 11;311.17526 2279;312.17236 18;313.44781 29;318.81158 12;322.10263 14;323.97949 37;330.4501 33;344.11176 77;349.06244 17;369.54126 44;379.50372 32;380.15295 99;390.29758 72;391.07687 132;392.20981 31;394.1188 41;416.05832 316;417.11798 24;428.76028 24;429.50912 30;434.05667 3178;435.08633 38;452.26…	0	0.000138544	0.00020231	0	6.81707e-05	0	0.000352606	0.000165761	0.000181199	0	0.000207872	0	0.00020028	8.6465e-05	0	0.000341722	0.000270257	0.000227753	0.000190901	0.00015095	0.000390559	0.000485997	0.000405103	0.000373485	0.000349139	0.000473588	0.000669312	0.000478921	0.000569258	0.00077263	0.000922333	0.00100433	0.000726625
341_RPPOS	17.89	478.293	[M+H]+	HMDB11477	6.3473	BMDB=BMDB11477,ChEBI=CHEBI:76090,FooDB=FDB028193,HMDB=HMDB11477	53480926	SVRBKLJIDJHADS-USWSLJGRSA-N	[H]OC([H])([H])C([H])(OC(=O)C([H])([H])C([H])([H])C([H])([H])C([H])([H])C([H])([H])C([H])([H])C([H])([H])C([H])=C([H])C([H])([H])C([H])=C([H])C([H])([H])C([H])([H])C([H])([H])C([H])([H])C([H])([H])[H])C([H])([H])OP(=O)(O[H])OC([H])([H])C([H])([H])N([H])[H]	HMDB11507	6.2485	BMDB=BMDB11507,ChEBI=CHEBI:83058,FooDB=FDB028223,HMDB=HMDB11507	90657442	DBHKHNGBVGWQJE-USWSLJGRSA-N	[H]OC([H])(C([H])([H])OC(=O)C([H])([H])C([H])([H])C([H])([H])C([H])([H])C([H])([H])C([H])([H])C([H])([H])C([H])=C([H])C([H])([H])C([H])=C([H])C([H])([H])C([H])([H])C([H])([H])C([H])([H])C([H])([H])[H])C([H])([H])OP(=O)(O[H])OC([H])([H])C([H])([H])N([H])[H]	155.51097 34;181.46582 17;183.30283 15;185.03629 28;186.40814 11;198.16962 17;236.38193 25;237.01819 22;240.13155 25;245.48178 47;246.20428 13;249.41968 10;253.20139 10;263.23907 51;266.15402 21;277.17365 18;286.92212 13;293.27704 17;305.29126 41;306.23572 22;308.92859 21;319.38171 13;321.23502 41;322.09259 23;324.03867 16;327.08093 31;337.29065 1344;338.50296 11;343.20224 29;362.48114 14;366.883…	9.19633e-05	0	7.77489e-05	0	3.39424e-05	0	0.000192878	0	9.92341e-05	0.000110139	8.22563e-05	9.05504e-05	0	0.000165765	0.000137597	0.000201656	0.000130779	0.000217708	0	0.000143853	0.000164983	0.000160493	0.000229939	0.000169766	0.000110383	0.000152646	0.000196367	0.000180575	0.000142639	0.000161494	0.000143256	0.000242046	0.000179231
364_RPPOS	17.52	502.293	[M+H]+	HMDB11488	6.3342	BMDB=BMDB11488,ChEBI=CHEBI:72746,FooDB=FDB028204,HMDB=HMDB11488	53480937	BAKUYTLDCVITBO-YSKCIPFOSA-N	[H]OC([H])([H])C([H])(OC(=O)C([H])([H])C([H])([H])C([H])([H])C([H])([H])C([H])([H])C([H])([H])C([H])=C([H])C([H])([H])C([H])=C([H])C([H])([H])C([H])=C([H])C([H])([H])C([H])=C([H])C([H])([H])C([H])([H])[H])C([H])([H])OP(=O)(O[H])OC([H])([H])C([H])([H])N([H])[H]	HMDB11518	6.3342	BMDB=BMDB11518,ChEBI=CHEBI:72742,FooDB=FDB028234,HMDB=HMDB11518	53480952	JPNPIRVRGLGTRE-YSKCIPFOSA-N	[H]OC([H])(C([H])([H])OC(=O)C([H])([H])C([H])([H])C([H])([H])C([H])([H])C([H])([H])C([H])([H])C([H])=C([H])C([H])([H])C([H])=C([H])C([H])([H])C([H])=C([H])C([H])([H])C([H])=C([H])C([H])([H])C([H])([H])[H])C([H])([H])OP(=O)(O[H])OC([H])([H])C([H])([H])N([H])[H]	171.3605 24;175.15517 15;181.01874 13;187.50055 15;197.11264 17;203.29712 82;214.633 11;241.19357 21;243.37424 16;265.20343 14;269.26093 167;271.45813 20;287.45541 54;310.33438 21;319.16565 12;330.44659 24;343.25937 27;345.79263 33;348.10623 81;361.1449 5384;361.77405 50;373.68207 12;382.05569 12;383.96411 14;386.44641 13;414.97726 54;417.17944 12;420.29984 71;421.60696 56;428.04587 32;429.49664 …	0.000238167	0.000204255	0.000155489	0.000215696	0.000162721	0	0.000379358	0.000356225	0.000149545	0.000209347	0.000199572	0.000231669	0.000299466	0.000364239	0.000332805	0.000381561	0.000328623	0.000287634	0.000153375	0.000153691	0.000402296	0.000326338	0.000408901	0.000231755	0.000530069	0.000492995	0.000999102	0.000918671	0.000544967	0.000667016	0.000350676	0.000712405	0.000655173
81_RPPOS	6.27	180.102	[M+H]+	HMDB05199	6.3305	BMDB=BMDB05199,ChEBI=CHEBI:113,FooDB=FDB000429,HMDB=HMDB05199; HMDB42012,KNApSAcK=C00001915,UNPD=UNPD118033	91588	IBRKLUSXDYATLG-UHFFFAOYNA-N	[H]OC1=C([H])C2=C(C([H])=C1(O[H]))C([H])(N([H])C([H])([H])C2([H])([H]))C([H])([H])[H]	CHEBI:76864	6.2733	ChEBI=CHEBI:76864; CHEBI:77031,UNPD=UNPD119769	6951458	IRZQDMYEJPNDEN-CBAPKCEASA-N	[H]OC(=O)C([H])(N([H])[H])C([H])(C1=C([H])C([H])=C([H])C([H])=C1([H]))C([H])([H])[H]	62.45051 5883;63.28134 23;82.50764 17;88.6084 40;90.39748 33;91.4738 162;98.28659 17;106.07358 35;109.70627 14;118.35332 10;119.25806 20;120.36238 27;122.42117 15;139.21844 11;152.35989 12;162.18764 1941;163.15442 3280;163.86815 50;	0.000873483	0.00114124	0.00115171	0.000319477	0.00107488	0.00188848	0.000752819	0.000940265	0.00200929	0.00142773	0.00154228	0.000951989	0.000547917	0.000668248	0.00075247	0.000589695	0.000560458	0.000465224	0.000733843	0.00114359	0.00072754	0.000609863	0.000461499	0.000467387	5.27314e-05	0.000482324	0.000259115	0.000250735	0.00049785	0.000174655	0.000829178	0.000630788	0.000246972
369_RPPOS	19.19	504.308	[M+H]+	HMDB11486	6.3298	BMDB=BMDB11486,FooDB=FDB028202,HMDB=HMDB11486	53480935	AKEOFNYGACQDRM-XQCPFYKGSA-N	[H]OC([H])([H])C([H])(OC(=O)C([H])([H])C([H])([H])C([H])([H])C([H])([H])C([H])([H])C([H])([H])C([H])=C([H])C([H])([H])C([H])=C([H])C([H])([H])C([H])=C([H])C([H])([H])C([H])([H])C([H])([H])C([H])([H])C([H])([H])[H])C([H])([H])OP(=O)(O[H])OC([H])([H])C([H])([H])N([H])[H]	HMDB11515	6.2404	BMDB=BMDB11515,FooDB=FDB028231,HMDB=HMDB11515	53480951	YBDFPZJQBYCWBA-WMTBOZPISA-N	[H]OC([H])(C([H])([H])OC(=O)C([H])([H])C([H])([H])C([H])([H])C([H])=C([H])C([H])([H])C([H])=C([H])C([H])([H])C([H])=C([H])C([H])([H])C([H])([H])C([H])([H])C([H])([H])C([H])([H])C([H])([H])C([H])([H])C([H])([H])[H])C([H])([H])OP(=O)(O[H])OC([H])([H])C([H])([H])N([H])[H]	149.13133 51;177.25613 22;189.42094 15;193.13855 12;195.23375 17;205.23193 20;213.38794 14;222.61722 11;231.20554 15;247.18741 12;271.12723 107;273.45825 25;277.97922 16;289.05234 172;291.13641 12;293.16028 11;323.15918 27;331.95453 27;333.1991 45;341.34793 12;350.3103 18;360.35699 19;363.24069 1275;376.47272 23;389.17032 42;416.7449 26;425.39392 21;432.11868 35;442.58768 163;443.25842 170;444.28…	0.000229237	8.84835e-05	0	0.000171685	9.78811e-05	0	0.000274072	0.000207451	0	8.60049e-05	0	4.40753e-06	0.000274328	0.000237999	0	0.000156687	1.81491e-05	9.57716e-06	5.28898e-05	0	0.000171311	0.00017221	0.000205372	0.00018657	0.000144605	0.000297525	0.00029901	0.00024865	0.000208568	0.000237512	0.00020041	0.00023534	0.000326938
1067_RPNEG	19.47	436.282	[M-H]-	HMDB11152	6.3226	BMDB=BMDB11152,HMDB=HMDB11152	42607469	QYTPGOPLNFESQC-NUTQULCTSA-N	[H]OC([H])(C([H])([H])OC([H])=C([H])C([H])([H])C([H])([H])C([H])([H])C([H])([H])C([H])([H])C([H])([H])C([H])([H])C([H])([H])C([H])([H])C([H])([H])C([H])([H])C([H])([H])C([H])([H])C([H])([H])[H])C([H])([H])OP(=O)(O[H])OC([H])([H])C([H])([H])N([H])[H]	C00016560	5.5893	KNApSAcK=C00016560,PubChem=10094631,UNPD=UNPD88970	10094631	SVYIMXYKHRBHSG-UHFFFAOYNA-N	[H]OC5([H])(C([H])([H])C([H])(OC6([H])(C([H])([H])C([H])([H])C4(C([H])([H])[H])(C([H])(C([H])([H])C([H])([H])C3([H])(C([H])([H])C=2C1=C([H])C([H])=C([H])C([H])=C1N([H])C=2C34(C([H])([H])[H])))C56(C([H])([H])[H]))))C(O[H])(C([H])([H])[H])C([H])([H])[H])	122.38319 12;127.4354 16;140.16344 355;151.2899 13;153.19218 85;166.45563 29;194.24594 11;196.09879 2887;196.83235 36;237.21503 29;239.36676 1496;350.80927 26;367.90866 10;375.27896 2772;376.34152 29;399.36444 11;408.12296 13;415.90598 33;417.4097 17;	0.00208398	0	0	0	0.000416796	0	0.00092923	0	0.00151109	0.00220786	0.00257078	0.00184758	0.00117253	0.00252738	0.00338809	0.00318835	0.00258771	0.00414391	0.00204757	0.00270158	0.00285982	0.00319736	0.00331709	0.00389409	0.00259125	0.00364987	0.00325405	0.00389167	0.00245489	0.00368256	0.00359093	0.00303263	0.00658499
1260_RPNEG	10.39	467.159	[M-H]-	C00008390	6.301	ChEBI=CHEBI:69681,KNApSAcK=C00008390,UNPD=UNPD145067	181193	WBZSDBHJYZORRP-VWLOTQADSA-N	[H]OC1=C([H])C([H])=C([H])C([H])=C1C([H])([H])C=3C(O[H])=C2C(=O)C([H])([H])C([H])(OC2=C(C=3(O[H]))C([H])([H])C=4C([H])=C([H])C([H])=C([H])C=4(O[H]))C5=C([H])C([H])=C([H])C([H])=C5([H])							181.46277 16;197.11627 20;240.44876 22;243.06082 113;261.20166 107;285.04971 311;350.02356 12;373.13586 23;385.18695 198;386.07147 19;403.15469 25320;404.90213 32;405.50705 18;412.77161 19;429.33023 16;430.22073 15;431.21436 31;449.03497 3786;449.68509 34;450.38272 23;	0	0	0	0	0	0	0.00118863	0	0.000358111	0.000292959	0.000308965	0	0.00132442	0.00238943	0.00205187	0.00117664	0.000550142	0.000480558	0.000260807	0.00105629	0.00132294	0.00158512	0.00111733	0.00044392	0	0.000175711	0.00036281	0	0.000608212	0.00103013	0.00026435	0.00064095	0
87_HilicNeg	5.7	885.551	[M-H]-	HMDB09894	6.2971	BMDB=BMDB09894,HMDB=HMDB09894	-1	CBYJKEBKBMWPMN-ITNYWZHKSA-N	[H]OC1([H])(C([H])(O[H])C([H])(O[H])C([H])(OP(=O)(O[H])OC([H])([H])C([H])(OC(=O)C([H])([H])C([H])([H])C([H])([H])C([H])([H])C([H])([H])C([H])([H])C([H])([H])C([H])([H])C([H])([H])C([H])([H])C([H])([H])C([H])([H])C([H])([H])C([H])([H])C([H])([H])C([H])([H])C([H])([H])[H])C([H])([H])OC(=O)C([H])([H])C([H])([H])C([H])([H])C([H])=C([H])C([H])([H])C([H])=C([H])C([H])([H])C([H])=C([H])C([H])([H])C([H])…	HMDB09900	6.2971	BMDB=BMDB09900,HMDB=HMDB09900	-1	RMRCTNVEDOWEQF-ZJBJTBMOSA-N	[H]OC1([H])(C([H])(O[H])C([H])(O[H])C([H])(OP(=O)(O[H])OC([H])([H])C([H])(OC(=O)C([H])([H])C([H])([H])C([H])([H])C([H])([H])C([H])([H])C([H])([H])C([H])([H])C([H])([H])C([H])([H])C([H])([H])C([H])([H])C([H])([H])C([H])([H])C([H])([H])C([H])([H])C([H])([H])C([H])([H])[H])C([H])([H])OC(=O)C([H])([H])C([H])([H])C([H])([H])C([H])([H])C([H])([H])C([H])([H])C([H])=C([H])C([H])([H])C([H])=C([H])C([H])([…	255.29877 44;259.19684 232;260.17334 26;281.23676 523;283.23184 4708;284.39572 13;285.40143 16;297.12854 936;298.34357 15;301.34122 38;303.28229 1171;304.21631 120;305.2995 239;306.2981 10;315.25259 205;331.61304 12;390.98407 14;417.1626 341;419.0835 3461;435.35144 33;437.20068 160;439.11414 275;440.42932 20;441.08423 46;457.44421 29;467.26141 15;507.07086 17;521.42102 17;524.74011 27;525.55011 2…	0.0016182	0.00145082	0.00122953	0.0010707	0.000181982	0	0.00166135	0.00200779	0	0.00178244	0.00130383	0.000235477	0.000409262	0.0012428	0.0014787	0.00201051	0.00097159	0.0032062	0.000150962	0	0.00121559	0	0	0.00331491	0.00300631	0.000106397	0.00459204	0.00319399	0.00171765	0.00298865	0.00119871	0.00312087	0.00406738
402_RPPOS	17.91	544.34	[M+H]+	HMDB10395	6.2951	BMDB=BMDB10395,ChEBI=CHEBI:74344,FooDB=FDB027546,HMDB=HMDB10395,YMDB=YMDB02213	24779476	LAXQYRRMGGEGOH-JXRLJXCWSA-N	[H]OC([H])(C([H])([H])OC(=O)C([H])([H])C([H])([H])C([H])([H])C([H])=C([H])C([H])([H])C([H])=C([H])C([H])([H])C([H])=C([H])C([H])([H])C([H])=C([H])C([H])([H])C([H])([H])C([H])([H])C([H])([H])C([H])([H])[H])C([H])([H])OP(=O)([O-])OC([H])([H])C([H])([H])[N+](C([H])([H])[H])(C([H])([H])[H])C([H])([H])[H]	HMDB10396	6.2594	BMDB=BMDB10396,FooDB=FDB027547,HMDB=HMDB10396,YMDB=YMDB02214	53480469	GOMVPVRDBLLHQC-VEJNOCSESA-N	[H]OC([H])(C([H])([H])OC(=O)C([H])([H])C([H])([H])C([H])([H])C([H])([H])C([H])([H])C([H])([H])C([H])=C([H])C([H])([H])C([H])=C([H])C([H])([H])C([H])=C([H])C([H])([H])C([H])=C([H])C([H])([H])C([H])([H])[H])C([H])([H])OP(=O)([O-])OC([H])([H])C([H])([H])[N+](C([H])([H])[H])(C([H])([H])[H])C([H])([H])[H]	166.24995 28;173.54581 10;181.24451 53;184.12656 12647;240.15833 110;241.32874 15;258.18298 262;269.11542 67;287.32382 19;360.98193 77;368.93774 22;371.43524 26;412.70233 49;426.56958 15;447.30212 14;457.2688 150;467.44287 56;476.1402 21;484.09583 137;485.36841 183;486.1861 19;508.12067 84;526.18793 52987;526.90607 252;	0.00182737	0.00149268	0.00200759	0.00104514	0.00147726	0.00101353	0.00142905	0.00142274	0.00230806	0.00164917	0.00155126	0.00107044	0.00173592	0.00225446	0.00146938	0.00234925	0.00202148	0.000933781	0.00101862	0.00266653	0.00200116	0.00232051	0.00275967	0.00285905	0.000285002	0.000528412	0.000507597	0.000364839	0.000611467	0.000548387	0.000817101	0.000744562	0.000703604
706_RPNEG	8.8	351.102	[M-H]-	HMDB60617	6.2889	ChEBI=CHEBI:61220; CHEBI:61222; CHEBI:63418; CHEBI:61217,HMDB=HMDB60617,STOFF=SI00004101	50909816	HCYWNSXLUZRKJX-RWMBFGLXSA-N	[H]OC(=O)C([H])(N([H])C(=O)C([H])([H])C1=C([H])C([H])=C([H])C([H])=C1([H]))C2([H])(N([H])C([H])(C(=O)O[H])C(C([H])([H])[H])(C([H])([H])[H])S2)	DB08559	5.6874	DrugBank=DB08559,PubChem=5289386	5289386	WMPGEOZLAYOFHH-MBNYWOFBSA-N	[H]OC(=O)C3([H])(N2C(=O)C([H])(N([H])C(=O)C([H])([H])C1=C([H])C([H])=C([H])C([H])=C1([H]))C2([H])S([H])(O[H])C3(C([H])([H])[H])(C([H])([H])[H]))	229.17682 343;273.12546 70;277.10764 16;278.14731 15;312.98639 16;	0.000519378	0.000301387	0.00060366	0	0.00185862	0.00786869	0.00263849	0.00440423	0.00151898	0.000305641	0	0.000246543	0.000460126	0.000590485	0.000422425	0.000347759	0.000314913	0.000288727	0.000280708	0.000368946	0.00052187	0.00030426	0.000382452	0.000321226	0.000256281	0	0.00016755	0	0.000261057	0.000320413	0.000296257	0.000229425	0.00026831
79_HilicNeg	5.59	473.219	[M-H]-	HMDB30004	6.2791	FooDB=FDB001294,HMDB=HMDB30004,UNPD=UNPD97249	-1	ZVFMDVFPBVFGPG-UHFFFAOYNA-N	[H]OC5([H])(C([H])([H])C3(OC2=C(C(OC([H])([H])[H])=C1C(=O)OC([H])([H])C1=C2C([H])([H])[H])C([H])([H])C3([H])C6(C([H])([H])[H])(C([H])([H])C([H])([H])C4(OC([H])([H])[H])(OC(C([H])([H])[H])(C([H])([H])[H])C56(O4))))(C([H])([H])[H]))	Nigakilactone G	6.0421	ChEBI=CHEBI:80889,UNPD=UNPD106832; UNPD125758; UNPD191386; UNPD204851	185611	BIJFTRIMTHYJOV-QRWZCSJESA-N	[H]OC3([H])(C([H])([H])C(C(=O)C1([H])(C([H])([H])OC(=O)C1([H])([H])))(C([H])([H])[H])C5([H])(C([H])([H])C(=O)OC4([H])(C([H])([H])C2([H])(C([H])(C([H])=C(OC([H])([H])[H])C(=O)C2(C([H])([H])[H])C3([H])C45(C([H])([H])[H]))C([H])([H])[H]))))	133.46516 49;145.35826 123;151.22829 43;187.15295 146;189.35495 36;211.28339 186;215.06921 65;257.06354 41;259.64151 51;276.98856 65;278.09387 123;279.05975 411;283.3432 101;285.57645 43;313.31995 129;323.38101 198;329.41412 189;355.1098 101;373.5824 39;395.41339 49;401.44427 165;411.2688 314;412.88803 20061;413.64236 522;415.10202 48;435.51886 92;455.16296 374;455.89474 121;457.52234 52;	0.184052	0.230162	0.230616	0.226127	0.18577	0.219877	0.248956	0.228826	0	0.224624	0.229982	0.242583	0.0802733	0.0936344	0.125152	0.153297	0.125312	0.216331	0.0697198	0	0.112945	0	0	0.221164	0.270133	0.135545	0.208813	0.228099	0.0827881	0.119793	0.215956	0.165373	0.247514
334_HilicPos	5.11	801.557	[M+H]+	PG(18:0/20:3(8Z,11Z,14Z))	6.2762	BMDB=BMDB10609,HMDB=HMDB10609	52927150	YDMMRUHKIIMRLH-MNQIWUGTSA-N	[H]OC([H])([H])C([H])(O[H])C([H])([H])OP(=O)(O[H])OC([H])([H])C([H])(OC(=O)C([H])([H])C([H])([H])C([H])([H])C([H])([H])C([H])([H])C([H])([H])C([H])=C([H])C([H])([H])C([H])=C([H])C([H])([H])C([H])=C([H])C([H])([H])C([H])([H])C([H])([H])C([H])([H])C([H])([H])[H])C([H])([H])OC(=O)C([H])([H])C([H])([H])C([H])([H])C([H])([H])C([H])([H])C([H])([H])C([H])([H])C([H])([H])C([H])([H])C([H])([H])C([H])([H])…	HMDB10608	6.273	BMDB=BMDB10608,HMDB=HMDB10608	53480611	HYLAOFWJHGFMIV-JKLLYNSPSA-N	[H]OC([H])([H])C([H])(O[H])C([H])([H])OP(=O)(O[H])OC([H])([H])C([H])(OC(=O)C([H])([H])C([H])([H])C([H])([H])C([H])=C([H])C([H])([H])C([H])=C([H])C([H])([H])C([H])=C([H])C([H])([H])C([H])([H])C([H])([H])C([H])([H])C([H])([H])C([H])([H])C([H])([H])C([H])([H])[H])C([H])([H])OC(=O)C([H])([H])C([H])([H])C([H])([H])C([H])([H])C([H])([H])C([H])([H])C([H])([H])C([H])([H])C([H])([H])C([H])([H])C([H])([H])…	437.07666 15;504.13916 16;534.21863 10;559.49127 51;560.09381 44;561.34851 16;565.09393 11;614.86682 33;615.79865 27;645.63947 13;671.72778 11;727.11957 26;727.78394 38;741.64093 85;765.43842 13;769.40875 59;783.29956 53;784.0069 60;	0.000666014	0.000753466	0.000564849	0.0007743	0.000814521	0.000887823	0.000775759	0.000670826	0	0.000875421	0.000852999	0.00079999	0.000546087	0.000445735	3.89469e-05	0.000454668	0.000540628	0.000134548	0.000472501	0	0.000388069	0.000454302	0	0.000483332	0.000555494	0.000519451	0.000446733	0.00051669	0.000124152	0.000489772	0.000486181	0.000365131	0.000400933
259_RPNEG	8.77	297.134	[M-H]-	CHEBI:82266	6.2719	ChEBI=CHEBI:82266	5796	WABPPBHOPMUJHV-UHFFFAOYNA-N	[H]C1=C([H])C=2OC([H])([H])OC=2(C([H])=C1(OC([H])(OC([H])([H])C([H])([H])OC([H])([H])C([H])([H])OC([H])([H])C([H])([H])[H])C([H])([H])[H]))	HMDB36159	6.2675	FooDB=FDB015012,HMDB=HMDB36159,KNApSAcK=C00012637,T3DB=T3D3714,UNPD=UNPD155691	-1	ZAXZBJSXSOISTF-UHFFFAOYNA-N	[H]OC([H])([H])C34(C([H])([H])C([H])(O[H])C(=C([H])C4([H])(OC2([H])(C([H])(O[H])C([H])(O[H])C3(C([H])([H])[H])(C12(OC1([H])([H]))))))C([H])([H])[H])	85.324 18;89.31885 69;97.43453 195;101.25296 798;102.00394 11;103.23097 90;109.19373 20;113.37749 165;114.42587 46;115.33093 139;115.94379 11;119.41965 29;125.33301 25;127.37978 196;130.27992 28;131.23183 256;133.42122 122;143.15549 46;144.30222 32;145.2388 155;161.16858 219;163.21634 7890;164.00961 41;173.30301 19;183.1058 15;234.89096 30;237.19672 31;261.11621 13;277.0047 25;279.10269 238;	0.0117078	0.012147	0.0125616	0.0122007	0.0128279	0.0155223	0.00368008	0.0167008	0.013159	0.016719	0.0182851	0.0104101	0.00855908	0.00420475	0.00187172	0.0124385	0.0151107	0.0155587	0.014322	0.00832415	0.00325414	0.00739633	0.00897683	0.01628	0.0178398	0.0148652	0.0118852	0.0135156	0.00878613	0.00441907	0.0116255	0.00851589	0.00635077
135_RPPOS	4.41	232.154	[M+H]+	CHEBI:28702	6.2682	ChEBI=CHEBI:28702	83170	MDXGYYOJGPFFJL-QMMMGPOBSA-N	[H]OC(=O)C([H])(N([H])C(=O)OC(C([H])([H])[H])(C([H])([H])[H])C([H])([H])[H])C([H])([H])C([H])(C([H])([H])[H])C([H])([H])[H]	DB02941	6.2472	DrugBank=DB02941,PubChem=46936533	46936533	NHQUUILSXUJSSP-RKDXNWHRSA-N	[H]OC(=O)C([H])([H])C([H])([H])C([H])([H])C([H])([H])C([H])([H])C([H])(C([H])([H])C(=O)O[H])C([H])(N([H])[H])C([H])([H])[H]	71.51197 15;85.39685 2307;86.03056 21;144.27788 104;158.34871 27;162.22057 25;169.01588 12;173.12509 1022;174.28255 288;176.38371 23;194.17628 24;197.34544 25;207.99475 19;214.14569 17;214.97934 21;224.26234 20;232.14093 11;	8.81263e-05	5.17394e-05	8.34406e-05	0.000241156	0.000106902	7.00469e-05	0.000270581	5.85925e-05	0.000289451	0.000216097	8.68347e-05	0.000143529	0.000529459	0.000554715	3.48736e-05	0.000538836	0.000578068	0.000363875	0.000987496	5.89203e-05	0.000483097	0.000489897	0.0004311	0.000389796	9.37572e-05	0.00169921	0.000615617	0.000770024	0.000955909	0.000621348	0.00118344	0.000886535	0.000984717
391_RPPOS	18.28	528.309	[M+H]+	HMDB11495	6.267	BMDB=BMDB11495,FooDB=FDB028211,HMDB=HMDB11495	53480944	KZXGPOLABXFBDK-SCFYABBUSA-N	[H]OC([H])([H])C([H])(OC(=O)C([H])([H])C([H])([H])C([H])([H])C([H])([H])C([H])([H])C([H])=C([H])C([H])([H])C([H])=C([H])C([H])([H])C([H])=C([H])C([H])([H])C([H])=C([H])C([H])([H])C([H])=C([H])C([H])([H])C([H])([H])[H])C([H])([H])OP(=O)(O[H])OC([H])([H])C([H])([H])N([H])[H]	HMDB11494	6.1604	BMDB=BMDB11494,FooDB=FDB028210,HMDB=HMDB11494	53480943	ZMHRXVSSWJALGN-GOGKNFEWSA-N	[H]OC([H])([H])C([H])(OC(=O)C([H])([H])C([H])([H])C([H])=C([H])C([H])([H])C([H])=C([H])C([H])([H])C([H])=C([H])C([H])([H])C([H])=C([H])C([H])([H])C([H])=C([H])C([H])([H])C([H])([H])C([H])([H])C([H])([H])C([H])([H])[H])C([H])([H])OP(=O)(O[H])OC([H])([H])C([H])([H])N([H])[H]	155.31479 61;157.08853 28;159.3531 59;161.30101 24;162.99544 22;169.27371 21;171.22366 42;173.14429 42;177.24187 60;180.91104 16;183.36691 16;185.38403 100;187.11317 34;189.26022 25;191.22595 68;197.33688 30;198.66086 41;199.38437 93;201.36749 107;213.28758 125;215.3092 51;216.18549 15;225.21272 18;227.24855 37;229.31247 81;230.99339 10;239.22556 19;241.37503 23;243.18175 12;245.13573 11;253.1186…	0.000268303	0.00021998	0.000201296	0.000318873	0.00020169	0	0.000230096	0.0002826	0.000234671	0.00017925	0.000223114	0.000222286	0.000341547	0.000334127	3.02384e-06	0.00035769	0.000393133	0.00029363	0.000229517	0.000212801	0.000253395	0.000425437	0.000320423	0.000345437	0.00020797	0.000461989	0.000554112	0.00036108	0.00027274	0.000271408	0.000347752	0.000349343	0.000468097
315_HilicPos	6.06	786.604	[M+H]+	HMDB00593	6.264	BMDB=BMDB00593,ChEBI=CHEBI:52360; CHEBI:60428; CHEBI:74669,DrugBank=DB03690,HMDB=HMDB00593,PlantCyc=CPD-2181,PubChem=6540623; 6437081,UNPD=UNPD4262,YMDB=YMDB01191	448653	SNKAWJBJQDLSFF-YEUCEMRANA-N	[H]C(=C([H])C([H])([H])C([H])([H])C([H])([H])C([H])([H])C([H])([H])C([H])([H])C([H])([H])C([H])([H])[H])C([H])([H])C([H])([H])C([H])([H])C([H])([H])C([H])([H])C([H])([H])C([H])([H])C(=O)OC([H])([H])C([H])(OC(=O)C([H])([H])C([H])([H])C([H])([H])C([H])([H])C([H])([H])C([H])([H])C([H])([H])C([H])=C([H])C([H])([H])C([H])([H])C([H])([H])C([H])([H])C([H])([H])C([H])([H])C([H])([H])C([H])([H])[H])C([H])…	PC(14:1(9Z)/22:1(13Z))	6.2453	BMDB=BMDB07920,HMDB=HMDB07920,YMDB=YMDB01838	53478629	CGXBWJDAGMQUFG-MHJIJCEHSA-N	[H]C(=C([H])C([H])([H])C([H])([H])C([H])([H])C([H])([H])C([H])([H])C([H])([H])C([H])([H])C(=O)OC([H])([H])C([H])(OC(=O)C([H])([H])C([H])([H])C([H])([H])C([H])([H])C([H])([H])C([H])([H])C([H])([H])C([H])([H])C([H])([H])C([H])([H])C([H])([H])C([H])=C([H])C([H])([H])C([H])([H])C([H])([H])C([H])([H])C([H])([H])C([H])([H])C([H])([H])C([H])([H])[H])C([H])([H])OP(=O)([O-])OC([H])([H])C([H])([H])[N+](C([…	481.28009 15;495.98932 16;504.36853 377;522.22046 227;603.39606 68;645.36389 42;725.30573 40;726.16144 80;727.17957 126;742.96759 25;767.86584 24;	0.0116665	0.011479	0.0110468	0.00985021	0.00874162	0.00633089	0.00968838	0.013982	0	0.0111385	0.0104956	0.0101658	0.00814811	0.0133225	0.0140077	0.0128186	0.0099058	0.0161646	0.00445225	0	0.0124127	0.0130037	0	0.0124125	0.0188664	0.0126213	0.0175921	0.0184269	0.0216064	0.0173868	0.0151739	0.017802	0.0185051
316_RPPOS	18.79	454.293	[M+H]+	HMDB11503	6.2619	BMDB=BMDB11503,ChEBI=CHEBI:73134; CHEBI:73004,FooDB=FDB028219,HMDB=HMDB11503,SMPDB=PW_C007100,YMDB=YMDB01197	58177710	YVYMBNSKXOXSKW-HXUWFJFHSA-N	[H]OC([H])(C([H])([H])OC(=O)C([H])([H])C([H])([H])C([H])([H])C([H])([H])C([H])([H])C([H])([H])C([H])([H])C([H])([H])C([H])([H])C([H])([H])C([H])([H])C([H])([H])C([H])([H])C([H])([H])C([H])([H])[H])C([H])([H])OP(=O)(O[H])OC([H])([H])C([H])([H])N([H])[H]	HMDB11473	6.1548	BMDB=BMDB11473,FooDB=FDB028189,HMDB=HMDB11473	53480922	CKPBBEOJHAPPBT-HXUWFJFHSA-N	[H]OC([H])([H])C([H])(OC(=O)C([H])([H])C([H])([H])C([H])([H])C([H])([H])C([H])([H])C([H])([H])C([H])([H])C([H])([H])C([H])([H])C([H])([H])C([H])([H])C([H])([H])C([H])([H])C([H])([H])C([H])([H])[H])C([H])([H])OP(=O)(O[H])OC([H])([H])C([H])([H])N([H])[H]	226.03394 13;269.72 16;313.33679 123;314.87369 18;346.15076 24;382.2908 37;390.13284 15;395.89328 17;396.87573 12;418.22409 175;424.77774 16;435.67401 30;436.29074 125;437.00848 42;446.2128 13;	0.000725752	0.000542968	0.000423537	0.000308332	0.000408593	4.2375e-05	0.00134866	0.000727277	0.000942666	0.000518756	0.000594743	0.000562378	0.000844666	0.00141187	0.00117034	0.00143443	0.00130684	0.00140571	0.000674126	0.000656377	0.00129175	0.00139275	0.00190896	0.00129561	0.000816155	0.00189102	0.00182177	0.00151717	0.00175499	0.00177119	0.00138663	0.00234908	0.00185165
294_RPPOS	6.51	432.28	[M+H]+	CHEBI:81447	6.2527	ChEBI=CHEBI:81447,UNPD=UNPD29342	46174030	HEQBQGYOPQNTBN-XIDLQPTCSA-N	[H]OC2([H])(C([H])(OC1([H])(OC([H])(C([H])([H])N([H])C([H])([H])C([H])([H])[H])C([H])([H])C([H])([H])C1([H])(N([H])[H])))C([H])(N([H])[H])C([H])([H])C([H])(OC([H])([H])[H])C2([H])(N(C(=O)C([H])([H])N([H])C([H])=O)C([H])([H])[H]))	HMDB61045	5.6372	HMDB=HMDB61045	-1	PGRMEHUQIPZHKM-UHFFFAOYNA-N	[H]OC=1C([H])=C([H])C(=C([H])C=1C([H])([H])O[H])C([H])(O[H])C([H])([H])N([H])C([H])([H])C([H])([H])C([H])([H])C([H])([H])C([H])([H])C([H])([H])OC([H])([H])C([H])([H])C([H])([H])C([H])(O[H])C2=C([H])C([H])=C([H])C([H])=C2([H])	133.1727 62;174.97754 11;177.00339 72;219.55304 30;221.17461 104;223.10129 49;281.43555 10;283.19461 20;306.20728 37;309.21204 52;320.10977 11;323.69281 17;327.24811 47;353.02808 22;355.45602 26;371.26407 97;372.7771 10;396.77689 16;399.99988 13;402.40237 11;403.33908 10;404.18692 22;407.12009 10;413.59415 28;415.07135 9480;415.67883 48;418.89053 20;	0.000639209	0.000590762	0.000644761	0.000474281	0.000571356	0.000507769	0.000434936	0.000601888	0.000675361	0.000513428	0.000761782	0.000560349	0.000722908	0.000559944	0.000613794	0.000650688	0.000657628	0.000523331	0.000574381	0.000564284	0.000354001	0.00048087	0.000340213	0.000491157	0.000423351	0.000420609	0.000283278	0.000322263	0.000265342	0.000258403	0.00038698	0.000365327	0.000293287
22_HilicNeg	20.58	174.04	[M-H]-	N-Acetyl-L-aspartic acid	6.2495	BMDB=BMDB00812,ChEBI=CHEBI:21547; CHEBI:16953,HMDB=HMDB00812,PubChem=65065,SMPDB=PW_C000649,T3DB=T3D4310,UNPD=UNPD77974	65065	OTCCIMWXFLJLIA-BYPYZUCNSA-N	[H]OC(=O)C([H])([H])C([H])(C(=O)O[H])N([H])C(=O)C([H])([H])[H]	Formylglutamic acid	6.2138	BMDB=BMDB03470,ChEBI=CHEBI:48309; CHEBI:17684,FooDB=FDB023180,HMDB=HMDB03470,PubChem=439376; 5459967,SMPDB=PW_C001903	439376	ADZLWSMFHHHOBV-BYPYZUCNSA-N	[H]OC(=O)C([H])([H])C([H])([H])C([H])(C(=O)O[H])N([H])C([H])=O	59.7091 35;71.6083 24;72.40601 11;88.30931 128;88.99008 24;112.25954 24;114.29166 692;115.39195 109;156.17519 292;	0.000200481	0.00184539	0.00233039	0.00285491	0.00127655	0.00157976	0.00320978	0.00208709	0	0.0030495	0.0024399	0.002298	0.00715677	0.00388784	0.00259257	0.00644706	0.00463576	0.00032317	0.00783872	0	0.00865571	0	0.0197736	0.00478205	0.0041055	0.016113	0.00481963	0.0101244	0.00947767	0.00761239	0.0114207	0.00755023	0.00723911
362_RPPOS	16.72	500.277	[M+H]+	HMDB11519	6.2489	BMDB=BMDB11519,FooDB=FDB028235,HMDB=HMDB11519	52925146	KCWGBXXAJHVZNN-KOYQJJOGSA-N	[H]OC([H])(C([H])([H])OC(=O)C([H])([H])C([H])([H])C([H])([H])C([H])=C([H])C([H])([H])C([H])=C([H])C([H])([H])C([H])=C([H])C([H])([H])C([H])=C([H])C([H])([H])C([H])=C([H])C([H])([H])C([H])([H])[H])C([H])([H])OP(=O)(O[H])OC([H])([H])C([H])([H])N([H])[H]	HMDB11489	6.2489	BMDB=BMDB11489,FooDB=FDB028205,HMDB=HMDB11489	53480938	MMHCCHGAKPRCIO-KOYQJJOGSA-N	[H]OC([H])([H])C([H])(OC(=O)C([H])([H])C([H])([H])C([H])([H])C([H])=C([H])C([H])([H])C([H])=C([H])C([H])([H])C([H])=C([H])C([H])([H])C([H])=C([H])C([H])([H])C([H])=C([H])C([H])([H])C([H])([H])[H])C([H])([H])OP(=O)(O[H])OC([H])([H])C([H])([H])N([H])[H]	145.34558 37;155.29573 17;159.44873 10;163.43976 14;171.34729 28;183.21971 18;187.36407 39;198.16992 16;199.29132 37;201.20541 32;209.32233 13;211.25113 15;225.36891 31;239.01205 22;243.30721 16;267.18423 292;269.11115 13;285.16376 167;287.16653 21;323.37271 34;328.22681 142;341.27637 13;359.16205 1297;359.77133 26;368.99377 20;369.74246 21;372.9187 22;377.30353 13;381.23184 13;382.12924 32;389.7…	0.000165447	0.000153527	0.000146623	0.000171608	0.000144342	8.45059e-05	2.69123e-05	0.00018501	0	0.000139286	0	0.00016736	0.000143193	0.000157156	0	0.00019863	0.00014886	0	0.000141356	0.000157118	0.000157518	0.000249325	0.000201969	0.000233839	0.000275088	0.000459075	0.000483062	0.0004961	0.000488303	0.000428186	0.000522852	0.000535744	0.000651665
32_HilicNeg	5.92	213.15	[M-H]-	3-Oxododecanoic acid	6.2489	BMDB=BMDB10727,ChEBI=CHEBI:18037; CHEBI:29743,FooDB=FDB019502; FDB027874,HMDB=HMDB39847; HMDB10727,PubChem=5460320,SMPDB=PW_C006734	25080123	DZHSPYMHDVROSM-UHFFFAOYSA-N	[H]OC(=O)C([H])([H])C(=O)C([H])([H])C([H])([H])C([H])([H])C([H])([H])C([H])([H])C([H])([H])C([H])([H])C([H])([H])C([H])([H])[H]	CHEBI:78977	5.9552	ChEBI=CHEBI:78977	10932814	KAAJBSCPZVDDGA-CSKARUKUNA-N	[H]OC(=O)C([H])=C([H])C([H])([H])C([H])([H])C([H])([H])C([H])([H])C([H])([H])C([H])([H])C([H])([H])C([H])(O[H])C([H])([H])[H]	83.5771 41;93.51009 12;125.32155 27;137.6255 17;139.2258 55;151.50079 38;153.28227 447;155.22185 43;179.42796 23;195.21303 185;	0.0024727	0.00248214	0.0023431	0.00333483	0.00241556	0.0017688	0.00337613	0.00278045	0	0.00279664	0.00235419	0.00250082	0.00583253	0.00423705	0.00367948	0.00568772	0.00548614	0.00453322	0.0045656	0	0.00513472	0	0	0.00420375	0.00013921	0.00444864	0.00404907	0.00337727	0.00292301	0.00302753	0.00440644	0.00427035	0.00463345
171_RPPOS	16.14	288.253	[M+H]+	CHEBI:73903	6.2431	ChEBI=CHEBI:73903	42608371	SEUBYHFHBZVRCC-QGAIPKOMSA-N	[H]OC([H])([H])C1([H])(N([H])C([H])(C([H])([H])C([H])([H])C([H])([H])C([H])([H])C([H])([H])C([H])([H])C([H])([H])C([H])(O[H])C([H])([H])C([H])([H])[H])C([H])([H])C([H])([H])C1([H])(O[H]))	HMDB32358	5.9864	FooDB=FDB009690,HMDB=HMDB32358,STOFF=SI00000168	8430	AOMUHOFOVNGZAN-UHFFFAOYSA-N	[H]OC([H])([H])C([H])([H])N(C(=O)C([H])([H])C([H])([H])C([H])([H])C([H])([H])C([H])([H])C([H])([H])C([H])([H])C([H])([H])C([H])([H])C([H])([H])C([H])([H])[H])C([H])([H])C([H])([H])O[H]	88.42683 526;106.32716 2260;163.34769 33;165.39316 17;178.19615 21;186.51248 15;195.52704 30;217.92667 11;227.29242 1326;228.32379 10;231.35855 10;232.25674 11;252.41837 41;256.25507 12;260.30527 56;270.24072 287;271.12961 37;	1.33624e-05	8.06778e-05	0.000178736	0.000212883	0.000134292	0.000185799	5.1766e-05	0.000109536	0.000161472	0	1.14868e-05	8.68859e-05	0.00028558	0.000233149	7.1295e-05	0.000264127	0.000344708	0.000172267	0.000310919	0.000219211	0.000247526	0.000309037	0.000279191	0.000277324	6.40248e-05	0.000126054	4.67265e-05	0.000161531	0	0.000156434	0.000137265	4.83856e-05	0.00026794
382_RPPOS	18.98	522.355	[M+H]+	HMDB02815	6.2423	BMDB=BMDB02815,ChEBI=CHEBI:28610; CHEBI:72589,FooDB=FDB023066,HMDB=HMDB02815,UNPD=UNPD65944,YMDB=YMDB01190; YMDB01810	16081932	YAMUFBLWGFFICM-PTGWMXDISA-N	[H]OC([H])(C([H])([H])OC(=O)C([H])([H])C([H])([H])C([H])([H])C([H])([H])C([H])([H])C([H])([H])C([H])([H])C([H])=C([H])C([H])([H])C([H])([H])C([H])([H])C([H])([H])C([H])([H])C([H])([H])C([H])([H])C([H])([H])[H])C([H])([H])OP(=O)([O-])OC([H])([H])C([H])([H])[N+](C([H])([H])[H])(C([H])([H])[H])C([H])([H])[H]	HMDB10385	6.1709	BMDB=BMDB10385,FooDB=FDB027536,HMDB=HMDB10385,YMDB=YMDB02211	53480465	PZRFVAHZNWPPAC-VBKSFVIKSA-N	[H]OC([H])(C([H])([H])OC(=O)C([H])([H])C([H])([H])C([H])([H])C([H])([H])C([H])([H])C([H])([H])C([H])([H])C([H])([H])C([H])([H])C([H])=C([H])C([H])([H])C([H])([H])C([H])([H])C([H])([H])C([H])([H])C([H])([H])[H])C([H])([H])OP(=O)([O-])OC([H])([H])C([H])([H])[N+](C([H])([H])[H])(C([H])([H])[H])C([H])([H])[H]	166.24423 34;184.17429 16166;184.80969 19;221.31764 22;240.25523 13;258.24036 42;265.40463 36;291.38361 18;298.56314 33;320.26819 15;350.26062 14;351.28345 11;365.14575 23;371.06329 20;372.13855 34;389.26526 14;391.57367 17;409.01434 14;410.41003 12;412.40979 17;416.05011 23;428.09717 31;433.27356 21;447.52838 11;448.81543 24;458.17419 25;460.19702 15;460.8512 306;461.6604 31;465.81726 11;476.569…	0.000893207	0.00078501	0.000903149	0.000451806	0.000692559	0.000429624	0.00123435	0.000883033	0.00145581	0.00094678	0.000822165	0.000565538	0.0011605	0.00186996	0.00103452	0.00173072	0.0016342	0.000937603	0.000724994	0.000965152	0.00174758	0.00209464	0.00171085	0.00144844	0.000927342	0.00140465	0.0016321	0.00126758	0.0016433	0.00175827	0.00154793	0.0026195	0.00176853
68_HilicNeg	5.65	385.178	[M-H]-	OLODATEROL	6.2363	ChEBI=CHEBI:82700; CHEBI:83309	11504295	COUYJEVMBVSIHV-SFHVURJKSA-N	[H]OC=2C([H])=C1C(OC([H])([H])C(=O)N1([H]))=C(C=2([H]))C([H])(O[H])C([H])([H])N([H])C(C([H])([H])[H])(C([H])([H])[H])C([H])([H])C3=C([H])C([H])=C(OC([H])([H])[H])C([H])=C3([H])	cd564	5.4707	DrugBank=DB02741,PubChem=2605	2605	RWYREGSYPCNZTL-UHFFFAOYSA-N	[H]OC(=O)C=1C([H])=C([H])C=2C([H])=C(C([H])=C([H])C=2(C=1([H])))C(=O)C=3C([H])=C([H])C4=C(C=3([H]))C(C([H])([H])[H])(C([H])([H])[H])C([H])([H])C([H])([H])C4(C([H])([H])[H])C([H])([H])[H]	113.54063 11;139.29599 12;149.18359 6628;149.85933 114;159.25961 39;179.25156 1495;181.28078 24;196.96684 15;199.63914 12;201.18665 35;205.25468 1980;207.34058 23;213.59451 65;214.22119 13;214.99011 17;216.9269 11;219.92018 23;233.61746 13;239.01608 58;240.38953 37;241.40869 29;243.14774 12;251.27582 35;252.54877 22;253.1629 60;255.11246 31;267.24692 177;269.35916 12;271.59579 24;275.50891 21;281…	0.000106322	0.000462507	0.000516302	6.12323e-05	7.34282e-05	0.00014334	0.000770965	0.000530563	0	5.55904e-05	0.000534565	0.0005578	0.002954	0.00516172	0.00390331	0.00218398	0.00144193	0.000730455	0.00878077	0	0.00596731	0	0	0	0.000654095	0.00426154	0.000425636	0.000539162	0.00510819	0.00809026	0.00113794	0.00232031	0.000420094
243_RPPOS	14.34	371.199	[M+H]+	C00041685	6.235	ChEBI=CHEBI:70501,KNApSAcK=C00041685; C00041239,UNPD=UNPD155457; UNPD63687	11501570	FNDWOLJMJUSGOB-DJBVCAICSA-N	[H]OC([H])(C([H])([H])[H])C4([H])(C([H])([H])N2C([H])([H])C([H])([H])C35(C1=C([H])C([H])=C([H])C(OC([H])([H])[H])=C1N([H])C5(=C(C(=O)OC([H])([H])[H])C4([H])(C([H])([H])C23([H])))))	C00025192	6.2095	ChEBI=CHEBI:70513,KNApSAcK=C00025192,UNPD=UNPD132491; UNPD176184; UNPD75022; UNPD215920	70698176	VZZBVNLFHYEUHM-CEYJTUKCSA-N	[H]OC([H])([H])C5(C(=O)OC([H])([H])[H])(C3([H])(C(=C([H])C([H])([H])[H])C([H])([H])N2C([H])([H])C([H])([H])C45(C=1C([H])=C([H])C([H])=C([H])C=1N([H])C24(C([H])(O[H])C3([H])([H])))))	111.16677 100;127.52473 10;129.26067 382;133.45288 10;141.29196 83;146.92055 326;151.10806 46;159.14586 1566;181.10117 528;182.03215 17;183.42055 19;185.52794 35;193.35841 33;197.1823 209;199.18832 102;211.13992 864;215.14221 7758;215.83694 27;219.30902 24;222.6246 17;224.77069 20;227.10638 43;228.96988 14;233.09671 32;235.26038 58;237.07193 266;238.80475 17;239.90881 101;240.9519 178;253.07724 4…	0	0	0	0	0	0	0	0	0	0	0	0	0	0	0	0	0	0	0	0	0	0	0	0	0	0	0	0	0	0	0	0	0
38_RPNEG	4.52	145.05	[M-H]-	Hexanedioic acid	6.2324	BMDB=BMDB00448,ChEBI=CHEBI:30832; CHEBI:17128; CHEBI:30833,ECMDB=ECMDB02973,HMDB=HMDB00448,KNApSAcK=C00001178,PlantCyc=ADIPATE,PubChem=196; 200164,UNPD=UNPD52406,STOFF=SI00000071	22494954	WNLRTRBMVRJNCN-UHFFFAOYSA-N	[H]OC(=O)C([H])([H])C([H])([H])C([H])([H])C([H])([H])C(=O)O[H]	HMDB06900	6.1967	BMDB=BMDB06900,ChEBI=CHEBI:27681; CHEBI:982; CHEBI:49256,ECMDB=ECMDB04001,FooDB=FDB024147,HMDB=HMDB06900,PlantCyc=2-ACETO-2-HYDROXY-BUTYRATE,PubChem=440875; 13999771; 21,YMDB=YMDB00039	440875	VUQLHQFKACOHNZ-LURJTMIESA-N	[H]OC(=O)C(O[H])(C(=O)C([H])([H])[H])C([H])([H])C([H])([H])[H]	83.45665 204;109.20395 16;126.35487 18;127.1572 158;	0.000737107	0.000829271	0.00111397	0.000954758	0.000966538	0.00119758	0.00124417	0.00120566	0.00121318	0.000923357	0.00120548	0.00148721	0.00147083	0.00097749	0.00109798	0.00187884	0.00180345	0.00236482	0.00128564	0.0014009	0.00121587	0.00170118	0.00131934	0.00104096	0.00116155	0.00117509	0.00114041	0.00136459	0.000973371	0.00102745	0.00177568	0.0010077	0.00131308
174_RPPOS	6.7	290.16	[M+H]+	HMDB00552	6.2317	BMDB=BMDB00552,ChEBI=CHEBI:70857,FooDB=FDB022112,HMDB=HMDB00552	-1	HFCPFJNSBPQJDP-UHFFFAOYNA-N	[H]OC(=O)C([H])([H])C([H])(OC(=O)C([H])([H])C([H])(C([H])([H])[H])C([H])([H])C(=O)[O-])C([H])([H])[N+](C([H])([H])[H])(C([H])([H])[H])C([H])([H])[H]	CHEBI:68568	5.9026	ChEBI=CHEBI:68568; CHEBI:77082	71296139	BSVHAXJKBCWVDA-UHFFFAOYNA-N	[H]OC(=O)C([H])([H])C([H])([H])C([H])([H])C([H])([H])C(=O)OC([H])(C([H])([H])C(=O)[O-])C([H])([H])[N+](C([H])([H])[H])(C([H])([H])[H])C([H])([H])[H]	109.42321 43;127.26469 93;147.43198 15;156.42114 17;158.53606 20;160.47025 11;166.61887 42;167.2578 49;169.26727 1721;183.48117 21;185.03847 222;188.30269 12;190.20731 13;191.31046 49;208.97928 12;213.65421 48;219.4754 12;221.78574 25;224.22366 14;225.76089 324;226.68549 1751;227.40222 836;228.27075 11;232.84305 12;237.16174 88;255.09583 184;266.60217 79;267.20575 29;272.18881 822;273.04559 4826;…	0.000209829	0.000215079	0.000233701	0.000370659	0.000237203	0.000156749	0.000572801	0.000391667	0.000322689	0.000310591	0.000312684	0.000311322	0.00152174	0.000999954	0.000731618	0.00106089	0.001705	0.00112828	0.00131416	0.000474352	0.000780559	0.000885095	0.000910908	0.000997231	0.000396721	0.00085757	0.000528394	0.000498843	0.000361876	0.000457438	0.000493304	0.000382545	0.000562445
202_RPPOS	8.46	316.175	[M+H]+	CHEBI:73050	6.2135	ChEBI=CHEBI:73050	71464501	XRUHWUXLQZMBGC-VQHVLOKHNA-N	[H]OC(=O)C([H])([H])C([H])([H])C([H])([H])C([H])([H])C([H])=C([H])C(=O)OC([H])(C([H])([H])C([H])([H])C(=O)[O-])[N+](C([H])([H])[H])(C([H])([H])[H])C([H])([H])[H]	HMDB15494	4.8637	DrugBank=DB01425,HMDB=HMDB15494,PubChem=43008,STOFF=SI00002782	43008	KSEYRUGYKHXGFW-UHFFFAOYNA-N	[H]C([H])=C([H])C([H])([H])N1C([H])([H])C([H])([H])C([H])([H])C1([H])C([H])([H])N([H])C(=O)C2=C([H])C3=NN([H])N=C3(C([H])=C2(OC([H])([H])[H]))	123.40146 31;188.38435 12;199.24878 23;202.62485 15;207.10895 13;225.24039 27;228.09821 18;231.12762 10;236.88153 34;241.42386 30;244.19809 22;253.58221 14;255.19031 18;257.33829 21;258.68494 32;280.99448 23;289.26834 12;292.97653 21;296.03564 12;297.91077 268;299.00122 2388;	0.0110879	0.0128011	0.0155753	0.0180063	0.0138833	0.0119459	0.015185	0.0133323	0.0124503	0.0153649	0.0153496	0.0140484	0.013696	0.00532649	0.00209162	0.0128107	0.0179366	0.0122387	0.00814489	0.0152801	0.00347218	0.00491141	0.011443	0.019496	0.0145676	0.0149055	0.0132587	0.0120085	0.00859601	0.00642142	0.0106487	0.00934294	0.00942135
248_RPPOS	12.22	376.176	[M+H]+	CHEBI:73491	6.2116	ChEBI=CHEBI:73491	71464589	IESFZVCAVACGPH-PEFMBERDSA-N	[H]OC(=O)C([H])([H])C([H])([H])C([H])(C(=O)N([H])C([H])(C(=O)N([H])C([H])(C(=O)O[H])C([H])(C([H])([H])[H])C([H])([H])C([H])([H])[H])C([H])([H])C(=O)O[H])N([H])[H]							127.58746 11;145.1441 25;152.42509 12;203.75223 20;206.27698 12;221.95248 15;250.97098 110;252.5752 49;253.21457 90;264.2431 134;267.22745 11;270.30457 14;283.85608 20;294.02716 13;339.55228 35;341.03333 296;355.89597 11;359.02994 6289;	0	0	0	0	0	0	0	0	0	0	0	0	0	0	0	0	0	0	0	0	0	0	0	0	0	0	0	0	0	0	0	0	0
460_RPPOS	22.06	702.537	[M+H]+	HMDB11342	6.2051	BMDB=BMDB11342,ChEBI=CHEBI:84533,HMDB=HMDB11342	52925128	ZVVYJAAMWXATNY-PRWZWGSOSA-N	[H]OP(=O)(OC([H])([H])C([H])([H])N([H])[H])OC([H])([H])C([H])(OC(=O)C([H])([H])C([H])([H])C([H])([H])C([H])([H])C([H])([H])C([H])([H])C([H])([H])C([H])=C([H])C([H])([H])C([H])([H])C([H])([H])C([H])([H])C([H])([H])C([H])([H])C([H])([H])C([H])([H])[H])C([H])([H])OC([H])=C([H])C([H])([H])C([H])([H])C([H])([H])C([H])([H])C([H])([H])C([H])([H])C([H])([H])C([H])([H])C([H])([H])C([H])([H])C([H])([H])C([…	CHEBI:34085	6.2027	ChEBI=CHEBI:34085	5282291	ITQDKQBSRNKQCX-ZCXUNETKNA-N	[H]OP(=O)(OC([H])([H])C([H])(OC(=O)C([H])([H])C([H])([H])C([H])([H])C([H])([H])C([H])([H])C([H])([H])C([H])([H])C([H])=C([H])C([H])([H])C([H])([H])C([H])([H])C([H])([H])C([H])([H])C([H])([H])C([H])([H])C([H])([H])[H])C([H])([H])OC(=O)C([H])([H])C([H])([H])C([H])([H])C([H])([H])C([H])([H])C([H])([H])C([H])([H])C([H])([H])C([H])([H])C([H])([H])C([H])([H])C([H])([H])C([H])([H])C([H])([H])C([H])([H])…	218.77211 26;221.12076 172;223.12613 97;225.07237 22;227.20482 30;241.39348 25;248.39474 33;251.15723 16;263.60547 39;264.97653 226;267.09113 35;270.25201 44;271.08319 227;277.41296 24;283.08432 109;293.05402 22;306.96454 14;309.0213 237;314.22101 148;315.00549 344;327.2453 45;338.41061 10;352.6073 47;353.32568 37;356.80255 34;358.80597 36;369.37714 15;371.38873 83;375.1908 10;385.36029 44;397.01…	0.000183141	0.000210934	0.000264204	0.000233183	0.000224007	0.000228573	0.000172446	0.000343666	0.000188342	0.000225662	0.000197345	0.000283	0.000280529	0.000220168	8.51511e-05	0.000372935	0.000375514	0.000101127	0.000255847	0.000230198	0.000216979	0.000230617	0.000262999	0.000315981	0.000287619	0.000372104	0.00023479	0.000286544	0	0	0.000281874	0.000209896	0.000262707
62_HilicNeg	5.17	339.291	[M-H]-	CHEBI:82470	6.2051	ChEBI=CHEBI:82470	62642	OUQGOXCIUOCDNN-UHFFFAOYNA-N	[H]C([H])([H])C([H])([H])C([H])([H])C([H])([H])C([H])([H])C([H])([H])C([H])([H])C([H])([H])C([H])([H])C([H])([H])C([H])([H])C([H])([H])C([H])([H])C([H])([H])C([H])([H])C([H])([H])C([H])([H])C(=O)OC([H])([H])C1([H])(OC1([H])([H]))	CHEBI:79194	6.1744	ChEBI=CHEBI:79194	86289811	CKLPOWVYEZATJE-HTXNQAPBSA-N	[H]OC(=O)C([H])=C([H])C([H])([H])C([H])([H])C([H])([H])C([H])([H])C([H])([H])C([H])([H])C([H])([H])C([H])([H])C([H])([H])C([H])([H])C([H])([H])C([H])([H])C([H])([H])C([H])([H])C([H])([H])C([H])([H])C([H])([H])C([H])([H])O[H]	163.43289 22;170.19307 33;183.1786 929;184.18156 113;197.29488 111;198.13858 44;211.2287 13;211.97464 19;217.46906 13;225.11786 13;239.13904 30;241.03046 22;253.1698 11;254.30579 15;255.28094 211;257.23495 10;267.29712 28;268.1712 26;275.3486 24;277.19574 119;279.33698 525;281.32297 90;283.47195 22;293.52313 10;295.25092 514;296.02524 16;297.4787 66;307.47284 15;308.88171 26;321.15274 294;322.269…	0.00120012	0.00100558	1.30742e-07	0.00145805	0.00113411	3.98916e-05	0.00166424	0.000253538	0	1.89133e-05	0.000152841	6.76419e-05	0.00303449	0.00223783	0.00207354	0.00310789	0.002857	0.00237537	0.00251062	0	0.00263818	0	0	0.00219392	0	0.0020285	0.000192713	0.00115563	8.18579e-05	0.000160241	3.16975e-06	0.00026366	0.000107168
178_RPPOS	17.7	297.243	[M+H]+	HMDB04670	6.1834	BMDB=BMDB04670; BMDB10223,ChEBI=CHEBI:34496; CHEBI:68946; CHEBI:77852,DrugBank=DB07302,FooDB=FDB003060,HMDB=HMDB04670; HMDB10223,KNApSAcK=C00000430,PlantCyc=CPD-8204,PubChem=5312830; 25245815,UNPD=UNPD154313; UNPD36936; UNPD214211	5312830	NPDSHTNEKLQQIJ-UINYOVNOSA-N	[H]OC(=O)C([H])([H])C([H])([H])C([H])([H])C([H])([H])C([H])([H])C([H])([H])C([H])([H])C([H])(O[H])C([H])=C([H])C([H])=C([H])C([H])([H])C([H])([H])C([H])([H])C([H])([H])C([H])([H])[H]	HMDB04702	6.1376	BMDB=BMDB04702,ChEBI=CHEBI:38299; CHEBI:27706; CHEBI:84026,FooDB=FDB023414,HMDB=HMDB04702,KNApSAcK=C00001241,PlantCyc=CPD-10320; CPD-14396,PubChem=40491779; 25246088; 5281128,UNPD=UNPD117438; UNPD174226; UNPD80238; UNPD88637	6449780	CCPPLLJZDQAOHD-FLIBITNWNA-N	[H]OC(=O)C([H])([H])C([H])([H])C([H])([H])C([H])([H])C([H])([H])C([H])([H])C([H])([H])C([H])=C([H])C([H])([H])C1([H])(OC1([H])(C([H])([H])C([H])([H])C([H])([H])C([H])([H])C([H])([H])[H]))	93.35755 26;95.50169 103;109.4396 197;116.25511 246;119.44787 47;121.42458 22;123.3247 51;125.21185 55;133.34146 36;134.50732 21;137.33693 39;139.3262 13;149.49352 82;151.32343 117;155.1978 89;157.54283 16;163.2997 33;164.71553 65;165.43779 149;168.87659 13;179.44119 11;189.57954 16;190.86913 32;195.14801 18;197.20224 14;203.20578 44;205.08804 12;207.14282 22;209.03876 27;211.61154 15;216.72162 1…	0.000171503	0	0.000155947	2.01021e-05	6.95105e-05	0	0.000346502	0.000173553	0.000212318	4.12774e-05	0.000169562	0	0.000810368	0.000625185	4.92384e-05	0.00050732	0.000803145	0.000452158	0.000691575	0.000216728	0.0004425	0.000751995	0.000571954	0.00066057	0.000113845	0.000344615	0.000272714	0.000173498	0	0	0.000213622	0.000200016	0.000248272
222_RPPOS	20.35	339.29	[M+H]+	CHEBI:82469	6.1727	ChEBI=CHEBI:82469	5354568	VWYIWOYBERNXLX-KTKRTIGZNA-N	[H]C(=C([H])C([H])([H])C([H])([H])C([H])([H])C([H])([H])C([H])([H])C([H])([H])C([H])([H])C([H])([H])[H])C([H])([H])C([H])([H])C([H])([H])C([H])([H])C([H])([H])C([H])([H])C([H])([H])C(=O)OC([H])([H])C1([H])(OC1([H])([H]))							95.39188 11;108.79662 13;109.39732 153;111.30573 10;119.12301 24;123.32908 126;127.43114 14;133.29636 31;134.97531 14;137.13885 72;143.42381 17;147.24261 19;151.30096 282;155.36105 14;160.0128 18;161.10153 38;163.30887 15;165.42334 46;169.27405 66;173.38824 19;177.21606 12;178.30969 15;179.24258 131;181.30328 15;189.29008 23;191.12294 84;193.03445 101;195.28859 23;196.32645 10;196.95575 41;201.45…	7.69429e-05	0.000107088	0	6.3856e-05	4.95773e-05	0	3.33078e-05	0	0	0	9.85382e-05	0	0.000264435	0.000301691	0.000129292	0.000284017	0.000342294	0	0.000288727	7.42034e-05	0.000199103	0.000270968	0.000288365	0.000337055	0	0.000197244	0	0	5.54323e-05	1.90262e-05	0	0.000111464	5.63826e-05
252_HilicPos	5.86	700.575	[M+H]+	GlcCer(d18:1/16:0)	6.1705	BMDB=BMDB04971; BMDB10708,ChEBI=CHEBI:83259; CHEBI:77462; CHEBI:84716,HMDB=HMDB04971; HMDB10708,PubChem=6321355,SMPDB=PW_C006716	14035030	VJLLLMIZEJJZTE-NNTBDIJYSA-N	[H]OC([H])([H])C1([H])(OC([H])(OC([H])([H])C([H])(N([H])C(=O)C([H])([H])C([H])([H])C([H])([H])C([H])([H])C([H])([H])C([H])([H])C([H])([H])C([H])([H])C([H])([H])C([H])([H])C([H])([H])C([H])([H])C([H])([H])C([H])([H])C([H])([H])[H])C([H])(O[H])C([H])=C([H])C([H])([H])C([H])([H])C([H])([H])C([H])([H])C([H])([H])C([H])([H])C([H])([H])C([H])([H])C([H])([H])C([H])([H])C([H])([H])C([H])([H])C([H])([H])[…							250.96577 21;264.24179 35;269.26056 13;305.42075 20;520.30206 124;528.16443 30;548.93756 17;550.3988 12;557.12567 13;573.24847 30;584.21765 13;587.49615 15;595.23633 12;598.00275 20;612.41986 15;613.43536 14;642.4809 12;664.29724 14;682.34015 1091;683.07513 77;	0.000521338	0.000537786	0.000522044	0.000100919	0.000435907	1.73555e-05	0.000109245	0.000622164	0	0.000495755	9.18645e-05	0.000427555	0.000300423	0.000481877	0.000616621	0.000459153	0.000352446	0.000747364	0.000146337	0	0.000378473	0.000492139	0	0.000421468	0.000605508	0.000300967	0.000598197	0.000617576	0.00071555	0.000594312	0.000333621	0.000432819	0.000558827
71_HilicNeg	5.58	413.198	[M-H]-	Eplerenone	6.1586	ChEBI=CHEBI:31547,DrugBank=DB00700,HMDB=HMDB14838,PubChem=443872; 21865526; 9939152; 150310,SMPDB=PW_C009176,STOFF=SI00005375	443872	JUKPWJGBANNWMW-VWBFHTRKSA-N	[H]C=1C(=O)C([H])([H])C([H])([H])C5(C=1C([H])([H])C([H])(C(=O)OC([H])([H])[H])C4([H])(C6([H])(C([H])([H])C([H])([H])C2(OC(=O)C([H])([H])C2([H])([H]))C6(C([H])([H])[H])(C([H])([H])C3([H])(OC345)))))(C([H])([H])[H])	HMDB30404	6.0669	FooDB=FDB002265,HMDB=HMDB30404,UNPD=UNPD45602	-1	BGKXQRPQNIXIMH-UHFFFAOYNA-N	[H]OC=4C([H])=C(OC([H])([H])[H])C([H])=C(C=4(C(=O)OC3([H])(C([H])([H])C2(C([H])([H])[H])(C3([H])(C(C([H])=O)=C([H])C1(O[H])(C([H])([H])C(C([H])([H])[H])(C([H])([H])[H])C([H])([H])C12([H])))))))C([H])([H])[H]	127.1785 42;133.23894 161;144.6404 82;145.4077 210;173.35196 11;175.24036 38;179.30835 24;182.70215 12;189.16934 79;219.12682 88;227.4866 10;241.09793 45;248.49088 30;267.25281 11;269.20883 23;273.18689 16;276.7077 12;279.11639 674;283.24911 10;285.39487 12;291.28391 22;293.38992 28;295.19788 20;297.18372 40;299.08319 39;319.17111 28;320.39862 12;323.59039 44;337.27908 20;339.32596 88;349.85266 1…	0.00335144	0.00409039	0.00414753	0.00412996	0.00342599	0.00415005	0.00466069	0.00371943	0	0.00425925	0.004444	0.00484902	0.00179948	0.0012375	0.00167806	0.0023771	0.00245764	0.00313309	0.00075481	0	0.00147309	0	0	0.00398549	0.00463882	0.00262891	0.00338738	0.00349713	0.000428008	0.000439368	0.00297605	0.00224863	0.00373512
192_RPNEG	16.65	265.147	[M-H]-	HMDB40905	6.1525	FooDB=FDB020741,HMDB=HMDB40905,UNPD=UNPD142470	-1	WZUJTFLPWFXBST-UHFFFAOYNA-N	[H]C1=C(C(=O)OC1([H])([H]))C2([H])(OC(C([H])([H])[H])(C([H])([H])C(=O)C([H])([H])C([H])(C([H])([H])[H])C([H])([H])[H])C([H])([H])C2([H])([H]))	HMDB33660	6.1385	FooDB=FDB011762,HMDB=HMDB33660,KNApSAcK=C00011437,UNPD=UNPD193975	-1	SUMMQMXACBFGLA-UHFFFAOYNA-N	[H]OC(C([H])([H])[H])(C([H])([H])C(=O)C([H])([H])C([H])(C([H])([H])[H])C([H])([H])[H])C([H])([H])C([H])([H])C(=O)C1=C([H])OC([H])=C1([H])	80.43256 19;97.25542 2672;181.23953 13;245.08263 83;	0.0446073	0.0390096	0.0271605	0.024603	0.0323777	0.0265083	0.00524329	0.0260513	0.0212719	0.0158703	0.0191648	0.0400296	0.00370264	0.00572059	0.00558665	0.00600404	0.00505483	0.00716393	0.0168459	0.0100722	0.00590964	0.00746104	0.00647553	0.00605591	0.0173898	0.0122525	0.0127005	0.0136901	0.00960684	0.0105634	0.0133281	0.0155209	0.0200775
140_RPPOS	8.78	246.17	[M+H]+	HMDB00688	6.1472	BMDB=BMDB00688,ChEBI=CHEBI:73025; CHEBI:70819,FooDB=FDB022183,HMDB=HMDB00688	169235	IGQBPDJNUXPEMT-UHFFFAOYNA-N	[H]C([H])([H])C([H])(C([H])([H])[H])C([H])([H])C(=O)OC([H])(C([H])([H])C(=O)[O-])C([H])([H])[N+](C([H])([H])[H])(C([H])([H])[H])C([H])([H])[H]	HMDB00378	6.1472	BMDB=BMDB00378,ChEBI=CHEBI:73026; CHEBI:84840,FooDB=FDB021996,HMDB=HMDB00378	9881339	IHCPDBBYTYJYIL-UHFFFAOYNA-N	[H]C([H])([H])C([H])([H])C([H])(C(=O)OC([H])(C([H])([H])C(=O)[O-])C([H])([H])[N+](C([H])([H])[H])(C([H])([H])[H])C([H])([H])[H])C([H])([H])[H]	120.96086 15;123.4281 16;167.33812 22;168.62862 27;169.34514 31;170.45494 14;171.20149 34;176.42654 24;183.12617 52;184.13286 15;186.08981 11;192.55287 25;193.26091 125;211.10652 690;215.20357 17;228.91975 7448;229.58772 33;	0	0.000202181	0.000196365	0.000395171	0.000174371	7.81392e-05	0.000336881	0.000218869	0.000259526	0.000190455	0.000173377	0.000193127	0.000909189	0.000524247	0.000339384	0.000640009	0.000682546	0.000402209	0.00074404	7.13562e-05	0.000427907	0.000403527	0.000470723	0.000550856	0.000124055	0.000426009	0.000375339	4.23203e-05	0.000244596	0.000203388	0.000297296	0.000237285	0.00034629
340_HilicPos	6	810.604	[M+H]+	PC(18:3(9Z,12Z,15Z)/20:1(11Z))	6.1461	BMDB=BMDB08209,HMDB=HMDB08209,YMDB=YMDB02009	52922857	WAZYDHAWJWFGBD-LMJTUUMUSA-N	[H]C(=C([H])C([H])([H])C([H])=C([H])C([H])([H])C([H])([H])C([H])([H])C([H])([H])C([H])([H])C([H])([H])C([H])([H])C(=O)OC([H])([H])C([H])(OC(=O)C([H])([H])C([H])([H])C([H])([H])C([H])([H])C([H])([H])C([H])([H])C([H])([H])C([H])([H])C([H])([H])C([H])=C([H])C([H])([H])C([H])([H])C([H])([H])C([H])([H])C([H])([H])C([H])([H])C([H])([H])C([H])([H])[H])C([H])([H])OP(=O)([O-])OC([H])([H])C([H])([H])[N+](C…	PC(20:1(11Z)/18:3(9Z,12Z,15Z))	6.1445	BMDB=BMDB08305,HMDB=HMDB08305,YMDB=YMDB02056	52923119	NOWQIXJSMOBJLS-LMJTUUMUSA-N	[H]C(=C([H])C([H])([H])C([H])=C([H])C([H])([H])C([H])([H])C([H])([H])C([H])([H])C([H])([H])C([H])([H])C([H])([H])C(=O)OC([H])(C([H])([H])OC(=O)C([H])([H])C([H])([H])C([H])([H])C([H])([H])C([H])([H])C([H])([H])C([H])([H])C([H])([H])C([H])([H])C([H])=C([H])C([H])([H])C([H])([H])C([H])([H])C([H])([H])C([H])([H])C([H])([H])C([H])([H])C([H])([H])[H])C([H])([H])OP(=O)([O-])OC([H])([H])C([H])([H])[N+](C…	289.27277 21;291.31287 32;340.27594 12;417.3797 49;485.40961 16;497.95612 20;506.40778 47;511.82672 10;523.23688 14;526.28973 74;527.30035 13;528.96594 11;535.46521 46;536.28058 29;537.49432 30;538.1792 28;550.45312 24;551.43207 37;572.81305 12;578.29791 12;622.25409 44;625.54193 190;627.21277 16;647.87164 18;650.37555 17;651.34717 14;652.30707 65;669.28217 15;687.28143 29;705.17896 14;723.31622 …	0.00531545	0.00509319	0.00484669	0.00430835	0.00403034	0.00260493	0.00483725	0.0069161	0	0.0051044	0.00512655	0.00493928	0.00296796	0.00503288	0.00489783	0.00485732	0.00354792	0.00581667	0.00150702	0	0.00457915	0.000495919	0	0.000718467	0.00254757	0.00190336	0.0025488	0.00279268	0.00318743	0.00264389	0.00251365	0.00276711	0.00284901
61_HilicNeg	4.48	339.2	[M-H]-	CANRENONE	6.1419	BMDB=BMDB03033,FooDB=FDB023096,HMDB=HMDB03033,STOFF=SI00007852	13789	UJVLDDZCTMKXJK-WNHSNXHDSA-N	[H]C4=C([H])C3([H])(C([H])(C([H])([H])C([H])([H])C2(C([H])([H])[H])(C3([H])(C([H])([H])C([H])([H])C12(OC(=O)C([H])([H])C1([H])([H])))))C5(C4=C([H])C(=O)C([H])([H])C5([H])([H]))(C([H])([H])[H]))	Norethisterone acetate	5.9909	ChEBI=CHEBI:7628,STOFF=SI00004389	5832	IMONTRJLAWHYGT-ZCPXKWAGSA-N	[H]C#CC3(OC(=O)C([H])([H])[H])(C([H])([H])C([H])([H])C2([H])(C4([H])(C([H])([H])C([H])([H])C1=C([H])C(=O)C([H])([H])C([H])([H])C1([H])C4([H])(C([H])([H])C([H])([H])C23(C([H])([H])[H])))))	119.41263 70;134.42206 12;170.18802 367;171.10648 33;183.17735 6987;184.14679 1221;185.2028 32;195.39853 12;197.16733 602;198.1732 211;199.21878 30;210.55191 15;211.40375 29;212.13245 62;225.09143 168;226.55472 28;239.16336 218;240.27716 35;241.16815 43;251.57727 11;253.14075 105;254.13229 50;255.17612 39;265.21024 101;267.20114 90;268.24872 34;275.39856 238;276.35617 40;281.17041 54;295.25961 18…	0	0	4.6322e-05	5.56943e-05	7.55427e-05	6.19689e-05	0	1.94612e-05	0.00015831	1.00247e-06	0.0001159	0	0.00101039	0.00100658	0.00343034	0.000143339	0.00250419	0.000102969	4.17812e-05	0.00125924	0.00123462	0.000560345	0.0907938	0.00382618	0.00119306	6.73464e-05	0	5.82828e-06	5.68257e-05	0.000131752	1.49612e-05	0	7.82165e-05
320_HilicPos	5.76	790.563	[M+H]+	PSer(36:1)	6.1364	BMDB=BMDB10163,ChEBI=CHEBI:78260; CHEBI:79096,HMDB=HMDB10163,UNPD=UNPD54560,YMDB=YMDB01257	59720717	AJFWREUFUPEYII-PAHWMLEVSA-N	[H]OC(=O)C([H])(N([H])[H])C([H])([H])OP(=O)(O[H])OC([H])([H])C([H])(OC(=O)C([H])([H])C([H])([H])C([H])([H])C([H])([H])C([H])([H])C([H])([H])C([H])([H])C([H])=C([H])C([H])([H])C([H])([H])C([H])([H])C([H])([H])C([H])([H])C([H])([H])C([H])([H])C([H])([H])[H])C([H])([H])OC(=O)C([H])([H])C([H])([H])C([H])([H])C([H])([H])C([H])([H])C([H])([H])C([H])([H])C([H])([H])C([H])([H])C([H])([H])C([H])([H])C([H]…	Phosphatidylserine(18:1/18:0)	6.0649	BMDB=BMDB12389,ChEBI=CHEBI:75103; CHEBI:74902,HMDB=HMDB12389	9547094	VYDABBXFPODZIE-IAJQVIMPSA-N	[H]OC(=O)C([H])(N([H])[H])C([H])([H])OP(=O)(O[H])OC([H])([H])C([H])(OC(=O)C([H])([H])C([H])([H])C([H])([H])C([H])([H])C([H])([H])C([H])([H])C([H])([H])C([H])([H])C([H])([H])C([H])([H])C([H])([H])C([H])([H])C([H])([H])C([H])([H])C([H])([H])C([H])([H])C([H])([H])[H])C([H])([H])OC(=O)C([H])([H])C([H])([H])C([H])([H])C([H])([H])C([H])([H])C([H])([H])C([H])([H])C([H])=C([H])C([H])([H])C([H])([H])C([H]…	267.31635 10;339.07208 28;341.04956 28;352.37512 16;369.53809 20;396.57013 19;493.53918 10;503.12018 11;531.54065 14;547.5871 67;591.133 264;603.13635 20;605.36237 8421;606.09271 16;692.32507 14;754.9245 36;772.72223 66;	5.9925e-05	9.71791e-05	0.00041911	5.47608e-05	0.000356965	0.0002142	0.000373756	0.000161747	0	0.000532825	0.00085456	0.000625776	0	0	7.58226e-05	0.000306063	0	7.2783e-05	0	0	0	0	0	0.000107686	0.00150968	0	0.00171601	0.00200243	0.00163553	0.00139047	0.000305423	0.000996291	0.00129435
85_RPPOS	7.45	183.102	[M+H]+	CHEBI:28045	6.1341	ChEBI=CHEBI:28045; CHEBI:19733; CHEBI:64815; CHEBI:64817,PubChem=9542992	441234	UJJNLVMCZZZXFW-UHFFFAOYNA-N	[H]OC(=O)C([H])([H])C1([H])(C(=O)C([H])=C(C([H])([H])[H])C1(C([H])([H])[H])(C([H])([H])[H]))	HMDB38181	6.0414	FooDB=FDB017420,HMDB=HMDB38181,KNApSAcK=C00010958,UNPD=UNPD72798; UNPD92411	-1	LBNWZGLSMCTAQB-UHFFFAOYNA-N	[H]OC12(OC(=O)C(=C2(C([H])([H])C([H])([H])C([H])(C([H])([H])[H])C1([H])([H])))C([H])([H])[H])	69.68248 18;95.43883 17;98.28593 20;113.37183 115;114.43805 19;118.93755 19;119.56564 23;121.26927 768;123.27603 948;125.26155 83;127.40445 13;142.14799 4439;155.16222 25;159.79037 481;163.49223 40;165.1769 4838;166.26756 54;181.92848 39;183.12694 68;	0.00165689	0.00177405	0.00232901	0.00100573	0.0015272	0.000870304	0.00112305	0.000896104	0.00203834	0.00169065	0.00216482	0.00183126	0.00303778	0.00242472	0.00224395	0.00250631	0.00298755	0.00363666	0.00359952	0.00181913	0.00181335	0.00164256	0.00227823	0.0024002	0.000302035	0.00237873	0.00139112	0.0016545	0.00110525	0.000754856	0.00124489	0.000995544	0.000915143
378_RPPOS	17.93	520.34	[M+H]+	HMDB10386	6.1224	BMDB=BMDB10386,ChEBI=CHEBI:28733,FooDB=FDB027537,HMDB=HMDB10386,PlantCyc=CPD-8347,UNPD=UNPD43989,YMDB=YMDB02212	11005824	SPJFYYJXNPEZDW-FTJOPAKQSA-N	[H]OC([H])(C([H])([H])OC(=O)C([H])([H])C([H])([H])C([H])([H])C([H])([H])C([H])([H])C([H])([H])C([H])([H])C([H])=C([H])C([H])([H])C([H])=C([H])C([H])([H])C([H])([H])C([H])([H])C([H])([H])C([H])([H])[H])C([H])([H])OP(=O)([O-])OC([H])([H])C([H])([H])[N+](C([H])([H])[H])(C([H])([H])[H])C([H])([H])[H]	CHEBI:76084	5.9081	ChEBI=CHEBI:76084	71768169	LSUXCWJOIAWGOU-FTJOPAKQSA-N	[H]OC([H])([H])C([H])(OC(=O)C([H])([H])C([H])([H])C([H])([H])C([H])([H])C([H])([H])C([H])([H])C([H])([H])C([H])=C([H])C([H])([H])C([H])=C([H])C([H])([H])C([H])([H])C([H])([H])C([H])([H])C([H])([H])[H])C([H])([H])OP(=O)([O-])OC([H])([H])C([H])([H])[N+](C([H])([H])[H])(C([H])([H])[H])C([H])([H])[H]	166.18222 12;177.17694 12;184.14432 2545;194.32034 15;233.21356 11;258.2323 50;264.17041 21;280.49661 15;291.14413 18;295.03937 34;307.46741 20;308.95508 11;319.35248 17;337.11743 13;354.74298 17;357.38232 48;362.98315 23;385.08136 11;386.02893 32;394.22955 20;395.46173 16;410.62677 38;411.98187 24;421.66412 39;434.28668 13;443.3175 64;452.26477 22;460.02887 19;460.70654 15;461.87579 18;477.67291…	0.000402056	0.000358824	0.000394487	0.000156826	0.000305779	0.000216702	0.000576597	0.000320257	0.000599161	0.000398069	0.000383379	0.000227532	0.000608936	0.000801731	0.000523671	0.000765372	0.000742657	0.000422353	0.000447195	0.00052992	0.000792568	0.00103718	0.000938369	0.000985804	0.000272531	0.000517139	0.000428753	0.000264535	0.000414995	0.000481419	0.000577892	0.00070899	0.000461516
1025_RPNEG	15.64	431.183	[M-H]-	HMDB36131	6.1184	FooDB=FDB014980,HMDB=HMDB36131,KNApSAcK=C00017353,UNPD=UNPD103279; UNPD15518	-1	DZIJJEZRPMYRRP-QFPWAJRANA-N	[H]C=1OC2=C(C=1C([H])([H])[H])C([H])(OC(=O)C(=C([H])C([H])([H])[H])C([H])([H])[H])C3(C([H])([H])[H])(C([H])(C([H])([H])[H])C([H])(OC(=O)C([H])=C([H])SC([H])([H])[H])C([H])([H])C([H])([H])C3([H])(C2([H])([H])))	CHEBI:17099	4.5916	ChEBI=CHEBI:17099; CHEBI:58013,UNPD=UNPD52752	54675755	LFDYHAWYVIBCDT-OYKKKHCWSA-N	[H]OC3=C([H])C([H])=C(C([H])=C1OC(=O)C(=C1(O[H]))C=2C([H])=C([H])C(O[H])=C(C=2([H]))C([H])([H])C([H])=C(C([H])([H])[H])C([H])([H])[H])C([H])=C3C([H])([H])C([H])=C(C([H])([H])[H])C([H])([H])[H]	149.21344 258;179.2149 148;197.19022 91;205.28685 309;225.172 62;247.04318 20;269.10837 17;306.94272 30;344.93079 27;353.43243 18;355.15283 7065;355.76361 39;395.21082 17;403.17502 1401;410.93253 86;413.12091 16;	0.015125	0.0126405	0.0114373	0.0146522	0.0137958	0.0151243	0.145873	0.0197799	0.0415252	0.0151723	0.01515	0.0116516	0.048572	0.0919562	0.0744475	0.0367166	0.0230522	0.0276876	0.0134245	0.0582815	0.0963318	0.0650882	0.0589748	0.0155044	0.0130088	0.0300769	0.0674021	0.0373901	0.108811	0.147724	0.0234905	0.0474486	0.0162732
339_RPPOS	19.31	474.26	[M+H]+	HMDB11510	6.1075	BMDB=BMDB11510,FooDB=FDB028226,HMDB=HMDB11510	52925137	WPGYUFCFBKWCSL-JVBHARQXSA-N	[H]OC([H])(C([H])([H])OC(=O)C([H])([H])C([H])([H])C([H])([H])C([H])([H])C([H])=C([H])C([H])([H])C([H])=C([H])C([H])([H])C([H])=C([H])C([H])([H])C([H])=C([H])C([H])([H])C([H])([H])[H])C([H])([H])OP(=O)(O[H])OC([H])([H])C([H])([H])N([H])[H]	HMDB11480	6.0674	BMDB=BMDB11480,FooDB=FDB028196,HMDB=HMDB11480	53480929	SYKRNJVTCMUCGF-JVBHARQXSA-N	[H]OC([H])([H])C([H])(OC(=O)C([H])([H])C([H])([H])C([H])([H])C([H])([H])C([H])=C([H])C([H])([H])C([H])=C([H])C([H])([H])C([H])=C([H])C([H])([H])C([H])=C([H])C([H])([H])C([H])([H])[H])C([H])([H])OP(=O)(O[H])OC([H])([H])C([H])([H])N([H])[H]	193.12247 27;261.25208 15;264.25888 14;277.13989 24;292.92831 26;331.40894 11;334.36655 21;337.3075 22;340.06769 19;350.72427 31;357.6308 12;371.0314 27;374.12711 32;400.25241 34;401.03513 18;415.27652 44;416.36496 21;437.84561 26;446.52023 15;456.07187 56;456.7847 22;	4.17623e-05	0	4.75753e-05	2.9405e-05	2.37485e-05	0	0	6.55801e-05	0.000123016	8.10094e-05	2.69928e-05	9.06442e-05	0	0.00020996	7.33663e-05	0	0	2.46253e-05	0	0	3.06184e-05	0	0	3.62165e-05	0.000107897	0.000256184	0.00027373	0.000231948	0.000175468	0.000245088	0.000249919	0.000260773	0
17_RPPOS	1.33	116.07	[M+H]+	Proline	6.0969	BMDB=BMDB00162; BMDB03411,ChEBI=CHEBI:16313; CHEBI:17203; CHEBI:26271; CHEBI:32862; CHEBI:32864; CHEBI:32867; CHEBI:32868; CHEBI:32871; CHEBI:32872,DrugBank=DB00172,ECMDB=ECMDB00162,FooDB=FDB023166,HMDB=HMDB00162; HMDB03411,KNApSAcK=C00001388,PlantCyc=PRO,PubChem=8988; 145742,SMPDB=PW_C000106; PW_C001878,T3DB=T3D4411,UNPD=UNPD57841,YMDB=YMDB00903; YMDB00378	8988	ONIBWKKTOPOVIA-BYPYZUCNSA-N	[H]OC(=O)C1([H])(N([H])C([H])([H])C([H])([H])C1([H])([H]))	HMDB30409	5.2745	FooDB=FDB002271,HMDB=HMDB30409,UNPD=UNPD121459	5318003	FTWHFXMUJQRNBK-UHFFFAOYSA-N	[H]OC(=O)C(=C([H])[H])C([H])([H])C([H])([H])N([H])[H]	56.62986 13;74.51457 36;84.46894 14;88.3942 20;98.35428 148;	0.000310476	0.000315321	0.000371816	0.000284301	0.000336614	0.000401156	0.00057197	0.000416584	0.000399173	0.000383881	0.000379379	0.000252543	0.000770091	0.000597077	0.000744035	0.000719038	0.00064582	0.000805601	0.000627123	0.000360069	0.000436188	0.000523843	0.000549848	0.000607463	0.00123687	0.00139813	0.00159682	0.00177	0.00123467	0.00107823	0.00129014	0.00156722	0.00133837
356_HilicPos	7.4	862.629	[M+H]+	HMDB08702	6.0964	BMDB=BMDB08702,HMDB=HMDB08702	53479367	OZHXZHXJMWKZQS-UBDQGBMGSA-N	[H]C(=C([H])C([H])([H])C([H])=C([H])C([H])([H])C([H])=C([H])C([H])([H])C([H])([H])C([H])([H])C([H])([H])C([H])([H])C(=O)OC([H])([H])C([H])(OC(=O)C([H])([H])C([H])([H])C([H])([H])C([H])([H])C([H])([H])C([H])([H])C([H])([H])C([H])([H])C([H])([H])C([H])=C([H])C([H])([H])C([H])([H])C([H])([H])C([H])([H])C([H])([H])C([H])([H])C([H])([H])C([H])([H])[H])C([H])([H])OP(=O)([O-])OC([H])([H])C([H])([H])[N+]…	HMDB08320	6.0917	BMDB=BMDB08320,HMDB=HMDB08320	53478905	PMEGQTAPMLGFBO-AICWAUARSA-N	[H]C(=C([H])C([H])([H])C([H])=C([H])C([H])([H])C([H])=C([H])C([H])([H])C([H])([H])C([H])([H])C([H])([H])C([H])([H])C(=O)OC([H])(C([H])([H])OC(=O)C([H])([H])C([H])([H])C([H])([H])C([H])([H])C([H])([H])C([H])([H])C([H])([H])C([H])([H])C([H])([H])C([H])=C([H])C([H])([H])C([H])([H])C([H])([H])C([H])([H])C([H])([H])C([H])([H])C([H])([H])C([H])([H])[H])C([H])([H])OP(=O)([O-])OC([H])([H])C([H])([H])[N+]…	264.32297 38;473.0556 21;485.40033 11;502.48523 12;520.2926 73;523.42145 18;534.27875 10;538.00427 64;563.28552 28;589.73468 20;700.72479 10;724.97552 12;730.77368 18;732.45819 11;735.74823 29;803.44073 30;819.40521 12;844.34674 473;	0.000728562	0.000609107	0.000576009	0.000567471	0.00059197	0.00036823	0.000590839	0.000918632	0	0.000663425	0.000605299	0.000554514	0.000577217	0.00136174	0.000854777	0.00118563	0.00096861	0.001497	5.89582e-05	0	0.00120566	0.00131892	0	0.00137739	0.00131569	0.000787077	0.00188697	0.00182775	0.0017494	0.00168677	0.000793934	0.00150098	0.00154299
108_RPPOS	7.45	200.128	[M+H]+	HMDB06406	6.0825	BMDB=BMDB06406,ChEBI=CHEBI:31529; CHEBI:59908,DrugBank=DB04688,FooDB=FDB023911,HMDB=HMDB06406,PlantCyc=CPD-9777,PubChem=443844; 104904,UNPD=UNPD23411,STOFF=SI00003617	443844	QIQNNBXHAYSQRY-ABIFROTESA-N	[H]OC2([H])(C([H])([H])C1([H])(N(C([H])([H])[H])C([H])(C([H])([H])C1([H])([H]))C2([H])(C(=O)OC([H])([H])[H])))	CPD-9773	5.9435	PlantCyc=CPD-9773,PubChem=25201065	25201065	WSIQDXJPYUPREA-UHFFFAOYNA-N	[H]C([H])([H])OC(=O)C([H])([H])C(=O)C([H])([H])C1([H])(C([H])([H])N(C([H])([H])[H])C([H])([H])C1([H])([H]))	74.68555 13;75.64963 44;84.63622 14;85.33882 12;96.35461 15;97.56497 24;100.51486 24;101.55264 40;102.46967 37;118.12782 15;121.40352 13;123.36143 19;137.07788 16;139.30247 22;140.37125 27;142.3212 19;149.21956 28;159.17998 552;164.07491 22;165.36624 12;170.00035 12;172.44701 36;176.24161 45;177.03925 62;182.99117 19930;183.62885 52;200.105 19;	0.00049588	0.000433322	0.00055946	0.000484369	0.000461796	0.000335946	0.000537382	0.000426888	0.000656334	0.000417702	0.000572534	0.000464444	0.00110364	0.000915649	0.000550034	0.000851372	0.00105293	0.00116246	0.00139301	0.000563492	0.00056442	0.000535565	0.000774481	0.000840132	9.03229e-05	0.00084173	0.000360888	0.000408219	0.00025242	0.000161412	0.000338488	0.000223962	0.000258222
51_RPPOS	1.15	146.165	[M+H]+	HMDB01257	6.0681	BMDB=BMDB01257,ChEBI=CHEBI:16610; CHEBI:57834,DrugBank=DB03566,ECMDB=ECMDB01257,HMDB=HMDB01257,KNApSAcK=C00001431,PlantCyc=SPERMIDINE,PubChem=1102; 6992097,SMPDB=PW_C000971,T3DB=T3D4167,UNPD=UNPD179137,YMDB=YMDB00232	1102	ATHGHQPFGPMSJY-UHFFFAOYSA-N	[H]N([H])C([H])([H])C([H])([H])C([H])([H])N([H])C([H])([H])C([H])([H])C([H])([H])C([H])([H])N([H])[H]							58.47319 179;72.45584 3432;73.46111 863;74.62776 530;75.45561 1222;86.51953 13;112.30916 1879;112.92816 144;118.388 30;128.27098 149;129.32494 4947;130.02177 91;	0.000489557	0.000356835	0	0.000868676	0.000361009	8.99759e-05	0.00224426	0.00269934	0.000647365	0.0017005	0.000741449	0.000126026	0.00201667	0.00399952	0.000336925	0.0020961	0.0035677	0.00203824	0.00362611	0.0011022	0.00152704	0.00235141	0.000393562	0.00330979	0	0.0014596	0.000305372	0.000547791	0	0	0.00118964	0	0.000350158
141_RPPOS	7.89	246.17	[M+H]+	HMDB00688	6.0624	BMDB=BMDB00688,ChEBI=CHEBI:73025; CHEBI:70819,FooDB=FDB022183,HMDB=HMDB00688	169235	IGQBPDJNUXPEMT-UHFFFAOYNA-N	[H]C([H])([H])C([H])(C([H])([H])[H])C([H])([H])C(=O)OC([H])(C([H])([H])C(=O)[O-])C([H])([H])[N+](C([H])([H])[H])(C([H])([H])[H])C([H])([H])[H]	HMDB00378	6.0624	BMDB=BMDB00378,ChEBI=CHEBI:73026; CHEBI:84840,FooDB=FDB021996,HMDB=HMDB00378	9881339	IHCPDBBYTYJYIL-UHFFFAOYNA-N	[H]C([H])([H])C([H])([H])C([H])(C(=O)OC([H])(C([H])([H])C(=O)[O-])C([H])([H])[N+](C([H])([H])[H])(C([H])([H])[H])C([H])([H])[H])C([H])([H])[H]	88.48221 15;100.7697 11;101.64032 26;151.18391 19;170.49786 15;173.61652 18;188.23891 19;209.47307 15;211.19136 881;214.61137 20;218.16618 22;227.96886 428;228.82439 2468;243.99316 16;	0.000250639	0.000241103	0.000223385	0.000229005	0.000196851	4.01238e-05	0.000295724	0.000261137	0.000392151	0.000194089	0.000281531	0.000220662	0.000789313	0.000572814	0.000276755	0.000542959	0.00100535	0.000697956	0.000806799	0.000317529	0.000425832	0.000478842	0.000641738	0.000581533	4.17908e-05	0.000701249	0.000329737	0.00038106	0.000233639	0.000203652	0.000310739	0.000245193	0.000259787
177_HilicPos	5.18	451.167	[M+H]+	(5r,6s,8s)-8-[3-(Aminomethyl)phenyl]-6-Hydroxy-5-Isopropyl-3-Oxo-1-Phenyl-2,7-Dioxa-4-Aza-6-Phosphanonan-9-Oic Acid 6-Oxide	6.0403	DrugBank=DB07157,PubChem=23653502	23653502	RTFGEFWZCFCODU-RBUKOAKNSA-N	[H]OC(=O)C([H])(OP(=O)(O[H])C([H])(N([H])C(=O)OC([H])([H])C1=C([H])C([H])=C([H])C([H])=C1([H]))C([H])(C([H])([H])[H])C([H])([H])[H])C=2C([H])=C([H])C([H])=C(C=2([H]))C([H])([H])N([H])[H]							149.03714 63;150.99149 11;165.09052 154;174.98613 46;180.00626 17;196.26561 13;207.07553 18;211.86887 19;231.0125 82;241.08081 50;274.92712 256;294.10822 13;295.2182 12;313.05298 164;318.9722 23;320.9863 166;331.07706 7176;338.92838 1540;345.40625 12;346.94016 40;357.70612 16;365.28815 16;369.095 269;376.97516 2678;380.36169 10;387.07718 12594;387.75565 27;389.36349 23;391.14224 22;393.53052 20;3…	0.00458153	0.00310555	0.00372698	0.00498874	0.00370946	0.00348639	0.0029131	0.00334226	0	0.00670396	0.00358287	0.00218367	0.0320346	0.0329596	0.0386133	0.0169136	0.00779413	0.0076712	0.0319514	0	0.0242949	0.0236268	0	0.00614189	0.00181307	0.00325847	0.0049001	0.000722399	0.0104605	0.00709733	0.00525135	0.0120401	0.00147254
190_RPPOS	8.46	302.174	[M+H]+	DB02529	6.0206	DrugBank=DB02529,PubChem=46936417	46936417	BULFTXGJKXVMER-ZNSHCXBVSA-N	[H]OC(=O)C1([H])(OC([H])(C(=O)N(C([H])([H])C([H])([H])[H])C([H])([H])C([H])([H])[H])C([H])(N([H])C(=O)C([H])([H])[H])C([H])(N([H])[H])C1([H])([H]))	HMDB32654	5.7765	FooDB=FDB010604,HMDB=HMDB32654,UNPD=UNPD41317	15596445	MRUXVACSRPRMSN-KQQUZDAGSA-N	[H]OC(=NC([H])([H])C([H])(C([H])([H])[H])C([H])([H])[H])C([H])=C([H])C([H])([H])C([H])([H])C([H])=C([H])C=1C([H])=C([H])C=2OC([H])([H])OC=2(C=1([H]))	101.55789 14;132.40005 12;139.23363 33;159.88966 10;161.32277 12;171.03249 20;172.19801 14;177.09695 15;179.15378 53;181.32298 16;185.30704 12;188.10959 22;189.12558 19;206.46478 26;211.26877 65;212.17783 11;217.17603 23;224.52347 30;231.10507 12;242.16492 48;249.11017 21;266.9024 181;269.94211 13;278.99121 64;283.51678 13;284.84833 295;	0.000595333	0.00084744	0.000909161	0.000878146	0.000819716	0.000868501	0.0011041	0.000871627	0.000890247	0.000948656	0.000985511	0.000806076	0.00111732	0.000698737	0.000333561	0.000931981	0.00111407	0.0011731	0.000793557	0.000519851	0.000326506	0.000342639	0.000641849	0.000638173	0.000901384	0.000675519	0.000789293	0.000939086	0.000497878	0.000501486	0.000545856	0.000570391	0.000428292
141_RPNEG	11.71	242.176	[M-H]-	N-Undecanoylglycine	6.0198	ChEBI=CHEBI:74438,HMDB=HMDB13286	454092	HEUQYIQQCNOXOG-UHFFFAOYSA-N	[H]OC(=O)C([H])([H])N([H])C(=O)C([H])([H])C([H])([H])C([H])([H])C([H])([H])C([H])([H])C([H])([H])C([H])([H])C([H])([H])C([H])([H])C([H])([H])[H]							179.22559 34;181.39355 4028;182.10277 14;207.03761 15;224.19385 380;225.32434 3049;	0.00340928	0.0105058	0.00950735	0.00319221	0.00638451	0.00530786	0.00524171	0.00379098	0.00540433	0.00300508	0.00519824	0.00978567	0.00402532	0.00265496	0.011395	0.00570252	0.00387152	0.0129287	0.00561618	0.00677272	0.007662	0.00703997	0.00683008	0.00578827	0.0112263	0.0101956	0.00881304	0.0111915	0.00654532	0.00490646	0.0142177	0.00688145	0.0108087
50_HilicNeg	11.83	297.134	[M-H]-	CHEBI:82266	5.9959	ChEBI=CHEBI:82266	5796	WABPPBHOPMUJHV-UHFFFAOYNA-N	[H]C1=C([H])C=2OC([H])([H])OC=2(C([H])=C1(OC([H])(OC([H])([H])C([H])([H])OC([H])([H])C([H])([H])OC([H])([H])C([H])([H])[H])C([H])([H])[H]))	HMDB37560	4.762	FooDB=FDB016642,HMDB=HMDB37560,UNPD=UNPD13488; UNPD94135	-1	QNKGXSIDHDDDHD-UHFFFAOYNA-N	[H]OC([H])([H])C34(C([H])(OC2([H])(C([H])(O[H])C([H])([H])C3(C([H])([H])[H])(C12(OC1([H])([H])))))C([H])=C(C([H])([H])[H])C([H])(O[H])C4([H])(O[H]))	85.70806 82;87.46215 158;88.30609 46;89.2952 485;89.92982 11;91.83714 60;95.23608 87;97.41626 770;99.48193 59;101.27553 7139;101.92171 330;103.27706 930;113.27501 1746;115.29387 2258;115.98076 85;119.14508 196;123.38051 58;124.967 94;127.32565 1236;128.79979 24;131.13077 2199;133.2428 317;142.44565 26;143.37592 182;145.19666 1737;147.42674 89;148.93362 26;160.11487 142;161.25128 2835;163.24393 10…	0.0537958	0.0591338	0.0621466	0.0701976	0.0554735	0.058006	0.0135731	0.0573348	0	0.0667742	0.0645953	0.0538309	0.0101368	0.0055324	0.0015502	0.0152499	0.0187478	0.0126783	0.00078718	0	0.00419554	0	0	0.0475244	0.0542616	0.0172383	0.0379043	0.0405621	0.0282017	0.0188578	0.015337	0.0257738	0.0359512
166_RPPOS	5.24	283.175	[M+H]+	Formosanan	5.9839	ChEBI=CHEBI:35946	9548846	SSEMHSZOXZYLBH-IHETXDGRSA-N	[H]C=4OC([H])([H])C5([H])(C([H])([H])N3C([H])([H])C([H])([H])C2(C1=C([H])C([H])=C([H])C([H])=C1N([H])C2([H])([H]))C3([H])C([H])([H])C5([H])(C=4([H])))	HMDB60992	5.5566	HMDB=HMDB60992,SMPDB=PW_C040599	-1	NVJBOLMRGMDGLD-UHFFFAOYSA-N	[H]OC1=C([H])C([H])=C3C(=C1([H]))C([H])([H])C([H])([H])C2=C([H])C([H])=C([H])C([H])=C2N3C([H])([H])C([H])([H])C([H])([H])N([H])C([H])([H])[H]	89.36038 284;97.21873 10;114.87385 11;132.25812 26;133.27625 602;134.45386 44;135.46362 13;151.24478 38;176.13943 52;177.18277 258;185.10252 15;186.03114 11;191.36591 23;192.2579 21;195.07965 72;196.30829 12;200.22006 38;211.40958 18;212.25833 17;219.0466 55;221.14392 81;225.17569 72;245.40933 21;247.14319 44;254.11496 15;258.73792 28;260.15808 15;265.15039 189;266.03714 21;	0.00016476	4.84203e-05	2.12217e-05	1.86835e-05	7.04943e-05	9.9386e-05	4.31161e-05	9.87714e-05	0.000114523	9.54707e-05	5.55615e-05	0.000152966	5.15066e-05	3.10833e-05	0	0.000152302	0.000122132	0.000102796	5.00081e-05	0.000141759	5.80313e-05	2.98326e-05	9.6802e-06	0.000105216	5.86155e-05	3.93077e-06	2.4837e-05	4.57842e-05	4.08418e-05	3.89957e-06	2.12762e-05	4.29307e-05	5.03115e-05
292_RPPOS	15.69	432.238	[M+H]+	CHEBI:73372	5.9744	ChEBI=CHEBI:73372	71464520	MLNSNVLOEIYJIU-ZUDIRPEPSA-N	[H]OC(=O)C([H])(N([H])C(=O)C([H])(N([H])C(=O)C([H])(N([H])C(=O)C([H])(N([H])[H])C([H])([H])[H])C([H])([H])C([H])(C([H])([H])[H])C([H])([H])[H])C([H])(O[H])C([H])([H])[H])C([H])([H])C([H])([H])C(=O)N([H])[H]							135.46457 17;147.27945 36;171.242 34;219.15634 14;220.10951 21;251.36676 30;254.21304 14;271.34232 18;276.98611 14;279.03748 12;281.13654 83;293.02203 13;295.20102 155;309.23386 24;310.99121 12;320.14612 23;331.1412 72;371.20267 11;373.17792 10;375.19946 27;397.11081 244;403.56448 23;412.68832 55;414.94479 22990;415.67279 37;431.42236 21;	0.0943172	0.103755	0.102311	0.0901801	0.0969838	0.094355	0.112249	0.0951088	0.0664755	0.0839313	0.0821697	0.0907438	0.060257	0.0588959	0.0714184	0.068868	0.0549199	0.0823582	0.0330132	0.0734546	0.0604414	0.0599706	0.0727626	0.0587587	0.102028	0.0501134	0.0830623	0.0865552	0.0630119	0.0543955	0.054484	0.0660991	0.0681135
463_RPPOS	20.06	722.506	[M+H]+	HMDB09477	5.9704	BMDB=BMDB09477,HMDB=HMDB09477	53479839	RBVIHSYTUKEAKV-DFAKUSJGSA-N	[H]OP(=O)(OC([H])([H])C([H])([H])N([H])[H])OC([H])([H])C([H])(OC([H])=C([H])C([H])([H])C([H])([H])C([H])([H])C([H])([H])C([H])([H])C([H])([H])C([H])([H])C([H])([H])C([H])([H])C([H])([H])C([H])([H])C([H])([H])C([H])([H])C([H])([H])[H])C([H])([H])OC(=O)C([H])([H])C([H])([H])C([H])([H])C([H])=C([H])C([H])([H])C([H])=C([H])C([H])([H])C([H])=C([H])C([H])([H])C([H])=C([H])C([H])([H])C([H])=C([H])C([H])…	HMDB11354	5.9374	BMDB=BMDB11354,HMDB=HMDB11354	52925061	RLLOITCRNQRGJD-DFAKUSJGSA-N	[H]OP(=O)(OC([H])([H])C([H])([H])N([H])[H])OC([H])([H])C([H])(OC(=O)C([H])([H])C([H])([H])C([H])([H])C([H])=C([H])C([H])([H])C([H])=C([H])C([H])([H])C([H])=C([H])C([H])([H])C([H])=C([H])C([H])([H])C([H])=C([H])C([H])([H])C([H])([H])[H])C([H])([H])OC([H])=C([H])C([H])([H])C([H])([H])C([H])([H])C([H])([H])C([H])([H])C([H])([H])C([H])([H])C([H])([H])C([H])([H])C([H])([H])C([H])([H])C([H])([H])C([H])…	211.23685 53;217.13327 43;218.9801 55;220.03207 33;221.05185 96;223.017 28;233.10913 34;234.99614 201;237.10004 20;243.97401 13;247.29694 368;255.09012 121;261.17401 52;265.05719 435;266.99991 24;271.11401 43;273.3089 82;279.05902 252;287.12607 34;289.21033 148;291.15189 1716;294.35889 17;297.0079 53;299.08093 288;305.22495 79;306.737 11;308.97546 448;311.33362 14;316.71127 14;317.31915 370;319.4…	0.00648149	0.00451586	0.00213688	0.00203536	0.00332188	0.00143979	0.000475065	0.000738144	0.0041884	0.00118279	0.000817268	0.00462603	0.00160666	0.000437848	0.000588848	0.00466158	0.00911293	0.00268709	0.000610681	0.000569812	0.000395354	0.000649321	0.000597711	0.000690645	0.000938242	0.0006004	0.000556277	0.00156743	0.000666972	0.00117172	0.00353773	0.00347977	0.00187214
337_HilicPos	6.01	806.573	[M+H]+	1-Palmitoyl-2-docosahexaenoyl-sn-glycero-3-phosphocholine	5.9666	BMDB=BMDB07991,ChEBI=CHEBI:74963; CHEBI:84797,HMDB=HMDB07991,UNPD=UNPD529,YMDB=YMDB01859	6441886	IESVDEZGAHUQJU-ZLBXKVHBSA-N	[H]C(=C([H])C([H])([H])C([H])=C([H])C([H])([H])C([H])=C([H])C([H])([H])C([H])([H])[H])C([H])([H])C([H])=C([H])C([H])([H])C([H])=C([H])C([H])([H])C([H])=C([H])C([H])([H])C([H])([H])C(=O)OC([H])(C([H])([H])OC(=O)C([H])([H])C([H])([H])C([H])([H])C([H])([H])C([H])([H])C([H])([H])C([H])([H])C([H])([H])C([H])([H])C([H])([H])C([H])([H])C([H])([H])C([H])([H])C([H])([H])C([H])([H])[H])C([H])([H])OP(=O)([O…	PC(20:5(5Z,8Z,11Z,14Z,17Z)/18:1(11Z))	5.8647	BMDB=BMDB08498,HMDB=HMDB08498,YMDB=YMDB02141	53479125	KAAXHFGQTWYDKM-PDYZRCSUSA-N	[H]C(=C([H])C([H])([H])C([H])=C([H])C([H])([H])C([H])=C([H])C([H])([H])C([H])([H])C([H])([H])C(=O)OC([H])([H])C([H])(OC(=O)C([H])([H])C([H])([H])C([H])([H])C([H])([H])C([H])([H])C([H])([H])C([H])([H])C([H])([H])C([H])([H])C([H])=C([H])C([H])([H])C([H])([H])C([H])([H])C([H])([H])C([H])([H])C([H])([H])[H])C([H])([H])OP(=O)([O-])OC([H])([H])C([H])([H])[N+](C([H])([H])[H])(C([H])([H])[H])C([H])([H])[…	245.38794 19;309.30185 22;327.0643 16;329.31982 21;373.32269 25;390.42023 10;477.89789 22;504.61993 16;507.53009 19;517.5343 23;521.74188 15;533.41882 21;534.13257 21;535.4068 70;549.12708 28;550.29248 25;552.31189 24;561.33905 11;568.18335 13;621.41357 12;623.4411 31;646.98395 21;664.20935 11;680.21979 29;684.16156 17;718.7735 14;746.61353 24;747.37347 146;759.97296 25;787.83746 13;789.33777 24;	0.00298032	0.00269244	0.00278442	0.00248352	0.00208018	0.00191154	0.003158	0.00389698	0	0.00286935	0.0030134	0.0028902	0.00374008	0.00400948	0.00448522	0.00377181	0.00332386	0.00376935	0.00287253	0	0.00439928	0.0042648	0	0.00368376	0.00304228	0.00302741	0.00294961	0.00343546	0.00413842	0.00330286	0.00358959	0.00336244	0.00334741
387_RPPOS	20.71	524.371	[M+H]+	HMDB10384	5.9657	BMDB=BMDB10384,ChEBI=CHEBI:73858,FooDB=FDB027535,HMDB=HMDB10384,UNPD=UNPD115977,YMDB=YMDB01187	497299	IHNKQIMGVNPMTC-RUZDIDTESA-N	[H]OC([H])(C([H])([H])OC(=O)C([H])([H])C([H])([H])C([H])([H])C([H])([H])C([H])([H])C([H])([H])C([H])([H])C([H])([H])C([H])([H])C([H])([H])C([H])([H])C([H])([H])C([H])([H])C([H])([H])C([H])([H])C([H])([H])C([H])([H])[H])C([H])([H])OP(=O)([O-])OC([H])([H])C([H])([H])[N+](C([H])([H])[H])(C([H])([H])[H])C([H])([H])[H]	HMDB11128	5.7889	BMDB=BMDB11128,ChEBI=CHEBI:76076,FooDB=FDB027907,HMDB=HMDB11128	24779491	IQGPMZRCLCCXAG-RUZDIDTESA-N	[H]OC([H])([H])C([H])(OC(=O)C([H])([H])C([H])([H])C([H])([H])C([H])([H])C([H])([H])C([H])([H])C([H])([H])C([H])([H])C([H])([H])C([H])([H])C([H])([H])C([H])([H])C([H])([H])C([H])([H])C([H])([H])C([H])([H])C([H])([H])[H])C([H])([H])OP(=O)([O-])OC([H])([H])C([H])([H])[N+](C([H])([H])[H])(C([H])([H])[H])C([H])([H])[H]	163.07648 12;166.54582 14;184.20082 2704;221.12581 21;239.58661 13;265.23328 12;271.26984 17;283.22101 12;312.94263 10;327.24554 15;332.22034 16;371.42645 18;380.29083 19;380.99585 18;385.11102 30;393.78619 11;396.09619 17;402.10742 33;411.02234 12;419.64758 40;420.37146 15;440.34021 29;455.55133 42;462.94379 26;463.5498 10;465.64069 11;488.4129 83;500.1106 13;506.315 2519;507.11133 212;	0.000312719	0.000354698	0.000355998	0.000454245	0.000348905	0.000266866	0.000163863	0.000297117	0.000386115	0.000279368	0.000253807	0.000289005	0.000224248	0.00026186	0	0.0003313	0.000266168	0.000200899	0.000142965	0.000387067	0.000220442	0.000223624	0.000253983	0.000208375	0	0.000153703	0	0	0	0	0.000149937	0.000213244	0.000144253
409_RPPOS	17.8	568.34	[M+H]+	HMDB10404	5.9448	BMDB=BMDB10404,ChEBI=CHEBI:73873,FooDB=FDB027555,HMDB=HMDB10404,UNPD=UNPD184170	10415542	LSOWKZULVQWMLY-APPDJCNMSA-N	[H]OC([H])(C([H])([H])OC(=O)C([H])([H])C([H])([H])C([H])=C([H])C([H])([H])C([H])=C([H])C([H])([H])C([H])=C([H])C([H])([H])C([H])=C([H])C([H])([H])C([H])=C([H])C([H])([H])C([H])=C([H])C([H])([H])C([H])([H])[H])C([H])([H])OP(=O)([O-])OC([H])([H])C([H])([H])[N+](C([H])([H])[H])(C([H])([H])[H])C([H])([H])[H]	CHEBI:76085	5.8019	ChEBI=CHEBI:76085	71768157	FTLVGMFFHDRYDI-APPDJCNMSA-N	[H]OC([H])([H])C([H])(OC(=O)C([H])([H])C([H])([H])C([H])=C([H])C([H])([H])C([H])=C([H])C([H])([H])C([H])=C([H])C([H])([H])C([H])=C([H])C([H])([H])C([H])=C([H])C([H])([H])C([H])=C([H])C([H])([H])C([H])([H])[H])C([H])([H])OP(=O)([O-])OC([H])([H])C([H])([H])[N+](C([H])([H])[H])(C([H])([H])[H])C([H])([H])[H]	162.88977 14;166.43524 28;173.23866 10;175.11035 20;175.81726 19;184.14716 2720;185.04773 20;221.15143 14;251.4184 24;258.22171 106;269.30823 26;275.45496 13;277.25049 23;281.14886 12;313.2149 28;315.01373 16;327.55585 17;337.37537 19;338.53308 76;353.50287 15;356.83545 14;383.1402 18;385.05853 21;386.22314 13;393.3595 30;401.10498 10;403.16376 19;406.86499 11;415.30548 24;419.39502 39;430.69031 …	0.000442678	0.000281074	0.000419866	0.000306213	0.00033884	0.000244369	0.000698138	0.000345472	0.000429917	0.000448714	0.000400516	0.000276364	0.000722346	0.000895621	0.000565339	0.000823952	0.000966615	0.000496671	0.000522463	0.000502637	0.000936797	0.00135872	0.000944378	0.000877074	0.000240032	0.000374373	0.000415242	0.000299114	0.000503003	0.000416119	0.000656985	0.000726902	0.000556238
240_HilicPos	11.98	675.546	[M+H]+	C14 Sphingomyelin	5.9374	BMDB=BMDB12097,ChEBI=CHEBI:64486,HMDB=HMDB12097	11433862	KYICBZWZQPCUMO-PSALXKTOSA-N	[H]OC([H])(C([H])=C([H])C([H])([H])C([H])([H])C([H])([H])C([H])([H])C([H])([H])C([H])([H])C([H])([H])C([H])([H])C([H])([H])C([H])([H])C([H])([H])C([H])([H])C([H])([H])[H])C([H])(N([H])C(=O)C([H])([H])C([H])([H])C([H])([H])C([H])([H])C([H])([H])C([H])([H])C([H])([H])C([H])([H])C([H])([H])C([H])([H])C([H])([H])C([H])([H])C([H])([H])[H])C([H])([H])OP(=O)([O-])OC([H])([H])C([H])([H])[N+](C([H])([H])[…							283.94446 11;352.58203 14;391.14557 11;601.54633 29;657.68457 60;	0.00045897	0.000511878	0.000429161	0.000362721	0.000490453	0.000315429	0.000348177	0.000415229	0	0.000375952	0.000186637	0.000134451	0.000198318	0.000720552	5.11329e-05	0.000690026	0.000468076	0.000197703	0	0	0.000599697	0.000282818	0	0.000407229	0.000465145	0.000963791	0.000640207	0.000714417	0.000686272	0.000683214	0.000345906	0.00101511	0.000634423
325_RPPOS	18.21	466.293	[M+H]+	HMDB10380	5.9353	BMDB=BMDB10380,ChEBI=CHEBI:73794,FooDB=FDB027531,HMDB=HMDB10380	24779456	JXGLGTFMAQOJBB-HEDKFQSOSA-N	[H]OC([H])(C([H])([H])OC(=O)C([H])([H])C([H])([H])C([H])([H])C([H])([H])C([H])([H])C([H])([H])C([H])([H])C([H])=C([H])C([H])([H])C([H])([H])C([H])([H])C([H])([H])[H])C([H])([H])OP(=O)([O-])OC([H])([H])C([H])([H])[N+](C([H])([H])[H])(C([H])([H])[H])C([H])([H])[H]							178.33115 14;181.20451 16;184.16995 20;197.93231 11;200.28281 13;220.1434 13;239.33743 13;246.22168 27;248.19904 11;250.05011 16;251.01721 38;262.28806 13;271.75436 31;278.91226 16;294.44202 13;303.2514 40;313.97617 13;321.0506 13;325.32034 1328;329.09964 21;352.09393 25;353.89737 54;362.98001 37;364.43549 14;365.9884 15;368.25204 10;388.28918 23;393.26074 12;402.43213 11;405.19989 139;406.25366 …	0	0	0	0	0	0	1.23097e-05	0	0	0	0	0	0.000121824	0.000126574	6.05165e-06	0	0.000110854	0	5.34015e-05	0	0.000163674	0.000135301	8.13238e-06	0.000124569	2.42626e-05	0.00011025	0	3.49625e-05	7.32515e-06	0.000125111	0	0.000200943	5.69232e-05
1249_RPNEG	15.82	459.201	[M-H]-	CHEBI:79929	5.9342	ChEBI=CHEBI:79929	11954172	WVSVAJGDZIWYBX-WFLBVZAHSA-N	[H]OC(=O)C([H])([H])C([H])([H])C(=O)OC([H])([H])C(=O)C3(O[H])(C([H])([H])C([H])([H])C2([H])(C4([H])(C([H])([H])C([H])([H])C1=C([H])C(=O)C([H])([H])C([H])([H])C1(C([H])([H])[H])C4([H])(C(=O)C([H])([H])C23(C([H])([H])[H])))))	CHEBI:69660	5.909	ChEBI=CHEBI:69660,UNPD=UNPD203974	56599261	BJUHMHABNCTBSM-TZDXKJQASA-N	[H]OC(C([H])([H])[H])(C([H])([H])[H])C([H])([H])C(=O)OC1([H])(C2([H])(OC(=O)C(=C([H])[H])C1([H])C([H])(OC(=O)C(=C([H])C([H])([H])[H])C([H])([H])[H])C3(C(=O)C([H])=C([H])C3([H])(C2([H])(C([H])([H])[H])))(C([H])([H])[H])))	261.77768 11;262.87585 12;270.78647 12;294.97925 38;338.98511 11;354.83224 28;373.23782 16;375.13882 12;378.71353 17;383.17361 22;393.08423 24;423.18665 16;431.04575 20;439.05215 121;	0.0029521	0.00347145	0.00376886	0.00333308	0.00361382	0.00454359	0	0.00459385	0.00269531	0.00240452	0.00292042	0.00355779	0.000551004	0.00142364	0.00138662	0.00132555	0.00113659	0.00139447	0.00251423	0.00170218	0.0011236	0.00146872	0.00190054	0.00310931	0.00424862	0.00282994	0.00257436	0.0034781	0.000914942	0.00140019	0.00225761	0.0019393	0.00359582
215_RPPOS	20.05	326.379	[M+H]+	1-Undecanamine, N-undecyl-	5.9299	ChEBI=CHEBI:74110	519223	NKGSHSILLGXYDW-UHFFFAOYSA-N	[H]N(C([H])([H])C([H])([H])C([H])([H])C([H])([H])C([H])([H])C([H])([H])C([H])([H])C([H])([H])C([H])([H])C([H])([H])C([H])([H])[H])C([H])([H])C([H])([H])C([H])([H])C([H])([H])C([H])([H])C([H])([H])C([H])([H])C([H])([H])C([H])([H])C([H])([H])C([H])([H])[H]							123.30397 17;157.28168 29;157.9193 60;168.05429 66;169.03226 13;181.41545 26;184.37178 1848;186.26804 42346;187.29887 2782;249.03021 29;309.24106 128;	0.0271113	0.026536	0.0279898	0.0351188	0.0283903	0.0251958	0.0139488	0.0365889	0.0423	0.0323661	0.0268915	0.021988	0.0194194	0.0326023	0.00782728	0.0142292	0.016528	0.00822109	0.023266	0.0366659	0.0144679	0.0236104	0.0214527	0.027807	0.0271622	0.0804086	0.0384549	0.0513557	0.0407654	0.0807967	0.0666325	0.0425308	0.0725882
487_RPPOS	20.39	820.6	[M+H]+	HMDB10164	5.9119	BMDB=BMDB10164,HMDB=HMDB10164	52926069	NTHGOQRMMGSVMQ-ZFESHMOZSA-N	[H]OC(=O)C([H])(N([H])[H])C([H])([H])OP(=O)(O[H])OC([H])([H])C([H])(OC(=O)C([H])([H])C([H])([H])C([H])([H])C([H])([H])C([H])([H])C([H])([H])C([H])([H])C([H])([H])C([H])([H])C([H])([H])C([H])([H])C([H])([H])C([H])([H])C([H])([H])C([H])([H])C([H])([H])C([H])([H])C([H])([H])C([H])([H])[H])C([H])([H])OC(=O)C([H])([H])C([H])([H])C([H])([H])C([H])([H])C([H])([H])C([H])([H])C([H])([H])C([H])([H])C([H])(…							239.30969 41;262.28067 14;262.95499 31;265.11017 478;267.2706 93;271.28442 17;283.20535 64;289.47614 24;306.96002 30;307.60822 21;308.51575 104;309.12387 815;311.15436 100;317.37457 13;327.11572 380;329.15515 12;344.91006 12;351.06946 33;352.62646 209;353.25491 452;355.21454 55;371.04532 149;385.97247 30;395.10864 15;396.88141 697;397.58337 14;398.94958 58;400.92267 24;411.31958 31;412.6377 16;41…	0.00147683	0.00148014	0.0015965	0.00214538	0.00164955	0.0015489	0.00122719	0.00146342	0.00217748	0.00170868	0.0015373	0.00165935	0.00224633	0.0019513	0.000877934	0.00105681	0.00235503	0.000928877	0.00260469	0.00204123	0.00153896	0.0019391	0.00160853	0.00227542	0.00153088	0.00205375	0.001299	0.000604025	0.0013849	0.00112132	0.00103145	0.000421169	0.00124308
357_HilicPos	12.01	862.629	[M+H]+	AG-H-10418	5.9109	BMDB=BMDB04833; BMDB06750,ChEBI=CHEBI:84758,FooDB=FDB023434,HMDB=HMDB04833; HMDB06750	20057274	HLIJNIKSBCIDGO-UAKVVYPDSA-N	[H]OC([H])([H])C2([H])(OC([H])(OC1([H])(C([H])(OC([H])(OC([H])([H])C([H])(N([H])C(=O)C([H])([H])C([H])([H])C([H])([H])C([H])([H])C([H])([H])C([H])([H])C([H])([H])C([H])([H])C([H])([H])C([H])([H])C([H])([H])C([H])([H])C([H])([H])C([H])([H])C([H])([H])[H])C([H])(O[H])C([H])=C([H])C([H])([H])C([H])([H])C([H])([H])C([H])([H])C([H])([H])C([H])([H])C([H])([H])C([H])([H])C([H])([H])C([H])([H])C([H])([H]…	PC(20:0/22:6)	5.1972	BMDB=BMDB08288,HMDB=HMDB08288	24779053	WAFWSBFKIPCFOF-ZDAJSWCOSA-N	[H]C(=C([H])C([H])([H])C([H])=C([H])C([H])([H])C([H])=C([H])C([H])([H])C([H])([H])[H])C([H])([H])C([H])=C([H])C([H])([H])C([H])=C([H])C([H])([H])C([H])=C([H])C([H])([H])C([H])([H])C(=O)OC([H])(C([H])([H])OC(=O)C([H])([H])C([H])([H])C([H])([H])C([H])([H])C([H])([H])C([H])([H])C([H])([H])C([H])([H])C([H])([H])C([H])([H])C([H])([H])C([H])([H])C([H])([H])C([H])([H])C([H])([H])C([H])([H])C([H])([H])C(…	264.41162 17;520.41443 67;538.15436 29;591.53839 11;666.04773 17;844.28925 368;845.62946 13;	0.000399612	0.000437595	0.000269044	0.00035317	0.000361913	8.55721e-05	0.000256021	0.000468182	0	0.000383774	0.000417569	0.000414186	0	0.000911834	9.35747e-05	0.000684439	0.000245374	0.000360564	0	0	0.000411109	0.000345116	0	0.000719773	0.000526985	0.000226759	0.00104491	0.000932059	0.000854322	0.00101577	0.000163295	0.00114474	0.000792121
311_HilicPos	6.07	780.557	[M+H]+	PC(16:0/20:5)	5.8671	BMDB=BMDB07984,HMDB=HMDB07984,YMDB=YMDB01855	24778723	KLTHQSWIRFFBRI-CPFPVJFHSA-N	[H]C(=C([H])C([H])([H])C([H])=C([H])C([H])([H])C([H])=C([H])C([H])([H])C([H])([H])C([H])([H])C(=O)OC([H])(C([H])([H])OC(=O)C([H])([H])C([H])([H])C([H])([H])C([H])([H])C([H])([H])C([H])([H])C([H])([H])C([H])([H])C([H])([H])C([H])([H])C([H])([H])C([H])([H])C([H])([H])C([H])([H])C([H])([H])[H])C([H])([H])OP(=O)([O-])OC([H])([H])C([H])([H])[N+](C([H])([H])[H])(C([H])([H])[H])C([H])([H])[H])C([H])([H]…	PC(20:5(5Z,8Z,11Z,14Z,17Z)/16:0)	5.8655	BMDB=BMDB08495,HMDB=HMDB08495,YMDB=YMDB02139	52923341	SUZYROYNFNQALJ-MHEIZRSESA-N	[H]C(=C([H])C([H])([H])C([H])=C([H])C([H])([H])C([H])=C([H])C([H])([H])C([H])([H])C([H])([H])C(=O)OC([H])([H])C([H])(OC(=O)C([H])([H])C([H])([H])C([H])([H])C([H])([H])C([H])([H])C([H])([H])C([H])([H])C([H])([H])C([H])([H])C([H])([H])C([H])([H])C([H])([H])C([H])([H])C([H])([H])C([H])([H])[H])C([H])([H])OP(=O)([O-])OC([H])([H])C([H])([H])[N+](C([H])([H])[H])(C([H])([H])[H])C([H])([H])[H])C([H])([H]…	353.01245 19;389.25006 26;391.43848 28;509.37292 60;521.13171 16;535.61475 13;549.23553 11;563.43433 22;608.69659 14;639.44293 11;680.97296 19;727.66388 40;745.20221 32;761.58344 17;762.21033 41;	0.00182294	0.00164008	0.0017534	0.00171483	0.00130794	0.00139519	0.00192442	0.00221024	0	0.00172888	0.00186063	0.00179763	0.00208154	0.00168118	0.00214726	0.00165067	0.00160691	0.00152728	0.0019274	0	0.00174719	0.00160373	0	0.00138579	0.000898316	0.00103338	0.000850974	0.00100733	0.00130936	0.000908851	0.00113554	0.000996118	0.000930349
842_RPNEG	12.19	362.171	[M-H]-	PubChem CID:24756824	5.8662	PubChem=24756824	24756824	ZRHRHNPLRGYPFJ-UHFFFAOYSA-N	[H]C=4C([H])=C5N=C2N=C1C(=C([H])N([H])N1C(=N2)N([H])C3([H])(C([H])([H])C3([H])([H])))C([H])([H])C([H])([H])C([H])([H])C([H])([H])C(=O)N([H])C(C=4([H]))=C5([H])	C00025304	4.8301	ChEBI=CHEBI:31505,KNApSAcK=C00025304,UNPD=UNPD30251	443774	NALOMJPIDNQZKW-ZIAGYGMSSA-N	[H]OC1=C([H])C([H])=C([H])C=2C1=C(OC([H])([H])[H])C([H])=C(C=2C3=C([H])C([H])=C(O[H])C4=C3C([H])([H])C([H])(N([H])C4([H])C([H])([H])[H])C([H])([H])[H])C([H])([H])[H]	128.21048 794;128.92599 19;141.32893 138;142.24088 91;205.51743 11;219.10049 22;220.28326 498;221.17545 954;233.20251 171;253.08783 17;262.0632 65;276.1665 294;282.18845 20;301.97592 31;304.96588 40;306.17899 16;322.95108 15;343.49408 15;345.06387 12;	0	0	0	0	0	0	0	0	0	0	0	0	0	0	0	0	0	0	0	0	0	0	0.000127854	0.00038356	0.00029725	0.000433976	0.00018527	0	0.000195122	0	6.92322e-05	0.000360117	0.00022058
427_RPPOS	10.94	615.404	[M+H]+	CPD0-1088	5.8576	ChEBI=CHEBI:1418,PlantCyc=CPD0-1088	107670	UMCMPZBLKLEWAF-BCTGSCMUSA-N	[H]OC1([H])(C([H])([H])C([H])([H])C3(C([H])([H])[H])(C([H])(C1([H])([H]))C([H])([H])C([H])(O[H])C2([H])(C4([H])(C([H])([H])C([H])([H])C([H])(C([H])(C([H])([H])[H])C([H])([H])C([H])([H])C(=O)N([H])C([H])([H])C([H])([H])C([H])([H])[N+](C([H])([H])[H])(C([H])([H])[H])C([H])([H])C([H])([H])C([H])([H])S(=O)(=O)[O-])C4(C([H])([H])[H])(C([H])(O[H])C([H])([H])C23([H]))))))							225.11444 540;277.16571 103;285.974 58;293.18634 41;311.32678 497;319.27985 410;337.11987 238;380.14575 43;394.24731 108384;394.85144 529;407.47296 188;412.35437 40649;413.12152 188;430.26044 52068;430.87964 162;439.35614 747;448.28668 59999;449.01733 103;457.37549 205;481.02356 54;543.01715 338;561.33405 7001;579.27246 125985;579.93353 773;597.28546 199212;597.92859 745;	0.0089355	0.00492073	0.00315503	0.00304245	0.00442796	0.00208606	0	0.000157881	0.00649732	0.0011721	0.000830733	0.00840431	0	0	0	0	0	0	0	7.44426e-05	0	0	0	0	0.000385394	0	0	0	0	0	7.63544e-05	0	4.39677e-05
243_HilicPos	6.42	678.51	[M+H]+	PE(15:0/16:0)	5.8463	BMDB=BMDB08890,HMDB=HMDB08890	52924933	DCIHLTIBNFDPMW-UUWRZZSWSA-N	[H]OP(=O)(OC([H])([H])C([H])([H])N([H])[H])OC([H])([H])C([H])(OC(=O)C([H])([H])C([H])([H])C([H])([H])C([H])([H])C([H])([H])C([H])([H])C([H])([H])C([H])([H])C([H])([H])C([H])([H])C([H])([H])C([H])([H])C([H])([H])C([H])([H])C([H])([H])[H])C([H])([H])OC(=O)C([H])([H])C([H])([H])C([H])([H])C([H])([H])C([H])([H])C([H])([H])C([H])([H])C([H])([H])C([H])([H])C([H])([H])C([H])([H])C([H])([H])C([H])([H])C(…	PE(16:0/15:0)	5.8463	BMDB=BMDB08922,HMDB=HMDB08922	52924926	JMDKMIIPLXAHQG-UUWRZZSWSA-N	[H]OP(=O)(OC([H])([H])C([H])([H])N([H])[H])OC([H])([H])C([H])(OC(=O)C([H])([H])C([H])([H])C([H])([H])C([H])([H])C([H])([H])C([H])([H])C([H])([H])C([H])([H])C([H])([H])C([H])([H])C([H])([H])C([H])([H])C([H])([H])C([H])([H])[H])C([H])([H])OC(=O)C([H])([H])C([H])([H])C([H])([H])C([H])([H])C([H])([H])C([H])([H])C([H])([H])C([H])([H])C([H])([H])C([H])([H])C([H])([H])C([H])([H])C([H])([H])C([H])([H])C(…	298.78064 22;308.18738 20;430.57434 36;493.21863 16;537.2066 16;537.80878 39;620.60675 17;660.63269 26;	0.000389863	0.000357867	0.000107424	0.000413518	0.000221002	0.000206531	0.000442746	0.000493392	0	0.000394964	0.000337755	0.000157249	0.00108885	0.000922626	0.000748241	0.000883138	0.000868071	0.000622438	0.000782375	0	0.000993038	0.000913164	0	0.000774821	0.00180085	0.00243851	0.00195149	0.00215561	0.00266133	0.0021799	0.00249213	0.00219405	0.00215224
279_RPPOS	15.69	415.211	[M+H]+	HMDB30404	5.8443	FooDB=FDB002265,HMDB=HMDB30404,UNPD=UNPD45602	-1	BGKXQRPQNIXIMH-UHFFFAOYNA-N	[H]OC=4C([H])=C(OC([H])([H])[H])C([H])=C(C=4(C(=O)OC3([H])(C([H])([H])C2(C([H])([H])[H])(C3([H])(C(C([H])=O)=C([H])C1(O[H])(C([H])([H])C(C([H])([H])[H])(C([H])([H])[H])C([H])([H])C12([H])))))))C([H])([H])[H]	HMDB39380	5.7989	FooDB=FDB018945,HMDB=HMDB39380,UNPD=UNPD25702	-1	ISKWRTCZWOXOOF-UHFFFAOYNA-N	[H]OC=4C([H])=C(OC([H])([H])[H])C([H])=C(C=4(C(=O)OC1([H])(C([H])([H])C2(C([H])([H])[H])(C3([H])(C([H])([H])C(C([H])([H])[H])(C([H])([H])[H])C([H])([H])C3([H])(C([H])=C(C([H])=O)C12(O[H])))))))C([H])([H])[H]	117.40837 17;119.28996 2105;120.1737 37;127.39465 84;133.25713 224;151.20605 63;159.26175 36;165.91901 14;171.41226 23;196.08221 12;199.42502 25;217.10336 40;219.24605 21;228.12173 15;245.17078 12;247.05539 220;251.21606 83;257.04147 14;259.06207 23;276.77048 162;279.05811 111;285.34427 11;286.08923 12;295.02029 758;315.01031 17;321.02698 28;325.17593 18;341.31625 19;346.84515 21;357.18433 71;376…	0.0380593	0.0429886	0.042885	0.0428341	0.0420119	0.0432922	0.0518191	0.0460941	0.0305097	0.0413973	0.0437194	0.0471485	0.030851	0.0308771	0.0326006	0.0365353	0.0313119	0.0415601	0.0165307	0.0479032	0.0326233	0.041621	0.0457451	0.0324912	0.0636877	0.028578	0.0521105	0.0511127	0.0308393	0.0320683	0.0329744	0.0470482	0.0425128
19_HilicNeg	20.07	168.027	[M-H]-	N-(2-Furoyl)glycine	5.8415	BMDB=BMDB00439,ChEBI=CHEBI:82912,HMDB=HMDB00439	21863	KSPQDMRTZZYQLM-UHFFFAOYSA-N	[H]OC(=O)C([H])([H])N([H])C(=O)C=1OC([H])=C([H])C=1([H])	HMDB12247	5.1207	BMDB=BMDB12247,ChEBI=CHEBI:18042; CHEBI:30620; CHEBI:11421; CHEBI:48052,ECMDB=ECMDB04056,HMDB=HMDB12247,KNApSAcK=C00007500,PlantCyc=2-3-DIHYDRODIPICOLINATE,PubChem=439982; 5460228	439982	UWOCFOFVIBZJGH-UHFFFAOYNA-N	[H]OC(=O)C1=NC([H])(C(=O)O[H])C([H])([H])C([H])=C1([H])	79.38118 21;100.30069 84;140.40572 42;142.39009 31;150.1924 33;	0.000456519	0	6.44429e-05	9.36e-05	4.00017e-05	0.000276591	0	4.26609e-06	0	0	0.000103338	0	0.000813045	0.000116029	0.000206589	3.60936e-05	0	8.35425e-05	0.00108823	0	0	0	0	0	0	0.00348016	0.000373464	0.00436211	0.0036619	0.00251844	0.00373509	0.00306443	0.000405409
75_RPPOS	7.45	165.091	[M+H]+	HMDB35213	5.8322	ChEBI=CHEBI:10447,FooDB=FDB013860,HMDB=HMDB35213,KNApSAcK=C00003062,UNPD=UNPD48339,STOFF=SI00002494	3611	FUWUEFKEXZQKKA-UHFFFAOYSA-N	[H]OC1=C([H])C(=C([H])C([H])=C([H])C1(=O))C([H])(C([H])([H])[H])C([H])([H])[H]	C00003063	5.5078	ChEBI=CHEBI:10578,KNApSAcK=C00003063,UNPD=UNPD170324	12649	WKEWHSLZDDZONF-UHFFFAOYSA-N	[H]OC1=C([H])C([H])=C(C([H])=C([H])C1(=O))C([H])(C([H])([H])[H])C([H])([H])[H]	57.28083 14;83.61897 20;93.39223 65;95.34897 46;103.59782 19;105.62329 18;107.45114 37;109.48302 31;124.47963 21;129.50255 36;137.196 37;147.23405 999;148.27092 57;	0.00014295	1.55213e-05	0.00014777	0.000137367	0.000103159	7.21881e-05	0.000153513	5.33486e-05	0.000197856	3.61874e-05	7.51809e-05	0.00014666	0.000397188	0.000351788	0.000119281	0.000313473	0.000561138	0.000397103	0.000534004	0.000227729	0.000305128	0.000363483	0.000444464	0.000499267	3.75389e-05	0.000438608	0.000195363	5.50985e-05	7.14335e-05	3.24029e-05	0.000206089	5.31318e-06	0.000161843
212_RPNEG	14.42	269.13	[M-H]-	CHEBI:23325	5.8225	ChEBI=CHEBI:23325; CHEBI:48269; CHEBI:48270,UNPD=UNPD132584; UNPD118136	10265155	VZMAHZAQMKNJIG-UHFFFAOYNA-N	[H]OC(=O)C3([H])(N([H])C([H])(C([H])=C(C([H])([H])[H])C([H])([H])[H])C=1C([H])=C([H])C([H])=C2C=1C(=C([H])N2([H]))C3([H])([H]))	HMDB11654	4.6947	BMDB=BMDB11654,ChEBI=CHEBI:16475; CHEBI:57784,FooDB=FDB028345,HMDB=HMDB11654,PubChem=25203042,YMDB=YMDB00302	440443	YBMOTEQVMANKGX-JAMMHHFISA-N	[H]OC(=O)C([H])(N([H])[H])C([H])([H])C1=C([H])N=C(N1([H]))C([H])([H])C([H])([H])C([H])(C(=O)O[H])N([H])C([H])([H])[H]	210.99968 32;229.04808 36;231.05901 17;249.07643 112;	0	0	0	0	0	0	0	0	0	0	0	0	0.000825317	7.90409e-05	0.000127141	0.000100419	0.000160686	0	0	6.56278e-05	7.13634e-05	0.00012552	0.000153688	0.00026418	0	0.000326254	0.000104833	0	0.000197909	0	0.000327302	0.000307936	0
40_HilicNeg	7.21	242.176	[M-H]-	N-Undecanoylglycine	5.7982	ChEBI=CHEBI:74438,HMDB=HMDB13286	454092	HEUQYIQQCNOXOG-UHFFFAOYSA-N	[H]OC(=O)C([H])([H])N([H])C(=O)C([H])([H])C([H])([H])C([H])([H])C([H])([H])C([H])([H])C([H])([H])C([H])([H])C([H])([H])C([H])([H])C([H])([H])[H]							81.48538 11;98.32088 22;179.28268 11;181.29428 9752;181.98212 76;224.44325 1405;225.19749 6119;	0.000179544	0.00379645	0.00391813	0.00138504	0.000154243	0.000207997	0.0021011	9.29344e-05	0	0.000170888	0.000249095	0.00370556	0.00205691	0.00111613	0.00637062	0.00219843	0.00141048	0.00403457	0.00331134	0	0.0034972	0	0	0.00205095	0.00566391	0.00260264	0.00410723	0.00441979	0.00309797	0.00216873	0.00659064	0.00284474	0.00419414
48_HilicNeg	5.16	283.264	[M-H]-	stearic acid	5.7979	BMDB=BMDB00827,ChEBI=CHEBI:37867; CHEBI:9254; CHEBI:28842; CHEBI:25629,DrugBank=DB03193,FooDB=FDB011515; FDB011518; FDB011517; FDB009516; FDB010327; FDB011516; FDB019203; FDB011514; FDB011519,HMDB=HMDB32300; HMDB32522; HMDB39580; HMDB00827,KNApSAcK=C00001238,PlantCyc=STEARIC_ACID,PubChem=11177; 5281; 3033836,SMPDB=PW_C000661,T3DB=T3D1556; T3D4755; T3D1097,UNPD=UNPD154975; UNPD22264,YMDB=YMDB00682…	23673840	QIQXTHQIDYTFRH-UHFFFAOYSA-N	[H]OC(=O)C([H])([H])C([H])([H])C([H])([H])C([H])([H])C([H])([H])C([H])([H])C([H])([H])C([H])([H])C([H])([H])C([H])([H])C([H])([H])C([H])([H])C([H])([H])C([H])([H])C([H])([H])C([H])([H])C([H])([H])[H]	Isooctadecanoic acid	5.5122	ChEBI=CHEBI:84896,FooDB=FDB003068,HMDB=HMDB31066,UNPD=UNPD110472,STOFF=SI00000101	21859	XDOFQFKRPWOURC-UHFFFAOYSA-N	[H]OC(=O)C([H])([H])C([H])([H])C([H])([H])C([H])([H])C([H])([H])C([H])([H])C([H])([H])C([H])([H])C([H])([H])C([H])([H])C([H])([H])C([H])([H])C([H])([H])C([H])([H])C([H])(C([H])([H])[H])C([H])([H])[H]	193.40985 80;263.52548 76;265.36945 5445;	0.107531	0.115123	0.10715	0.111772	0.0947173	0.115936	0.119979	0.0989973	0.00108526	0.12851	0.0865456	0.126946	0.186324	0.160272	0.118729	0.169746	0.209659	0.134399	0.138342	0.000181089	0.163566	0.000707058	0.00145979	0.178105	0.138764	0.134207	0.146289	0.191185	0.155418	0.146807	0.15891	0.132596	0.156368
204_RPPOS	10.09	318.191	[M+H]+	CHEBI:73052	5.789	ChEBI=CHEBI:73052	71464531	OMXXOMUNJWASGK-UHFFFAOYNA-N	[H]OC(=O)C([H])([H])C([H])([H])C([H])([H])C([H])([H])C([H])([H])C([H])([H])C(=O)OC([H])(C([H])([H])C([H])([H])C(=O)[O-])[N+](C([H])([H])[H])(C([H])([H])[H])C([H])([H])[H]							95.46312 80;97.26385 295;97.87967 13;99.40544 176;101.43769 98;109.38873 172;110.0276 11;113.44275 37;115.35234 73;122.63623 41;123.46341 170;125.39852 19;127.23331 130;129.41208 15;137.27444 157;139.40092 13;141.1422 23;143.35599 70;145.31851 73;147.10892 37;148.289 24;153.41695 11;155.20114 281;156.79161 246;157.44563 32;159.05214 25;161.14243 21;165.11943 242;169.33765 83;173.10097 14;177.3724…	4.8424e-06	5.85825e-05	0	0.000228569	5.83989e-05	0	0.000222415	0.000184299	0.000211063	3.84367e-05	0	3.39412e-05	0.00082252	0.0005363	0.000282185	0.000519921	0.000779538	0.000541452	0.0006487	2.78741e-05	0.000395526	0.000482738	0.000589937	0.000575405	3.56484e-05	0.00040611	0.000244724	0.00022191	0.000196179	0.000270865	0.000295543	0.000228244	0.000347269
381_RPPOS	19.39	522.355	[M+H]+	HMDB02815	5.7887	BMDB=BMDB02815,ChEBI=CHEBI:28610; CHEBI:72589,FooDB=FDB023066,HMDB=HMDB02815,UNPD=UNPD65944,YMDB=YMDB01190; YMDB01810	16081932	YAMUFBLWGFFICM-PTGWMXDISA-N	[H]OC([H])(C([H])([H])OC(=O)C([H])([H])C([H])([H])C([H])([H])C([H])([H])C([H])([H])C([H])([H])C([H])([H])C([H])=C([H])C([H])([H])C([H])([H])C([H])([H])C([H])([H])C([H])([H])C([H])([H])C([H])([H])C([H])([H])[H])C([H])([H])OP(=O)([O-])OC([H])([H])C([H])([H])[N+](C([H])([H])[H])(C([H])([H])[H])C([H])([H])[H]	HMDB10385	5.7173	BMDB=BMDB10385,FooDB=FDB027536,HMDB=HMDB10385,YMDB=YMDB02211	53480465	PZRFVAHZNWPPAC-VBKSFVIKSA-N	[H]OC([H])(C([H])([H])OC(=O)C([H])([H])C([H])([H])C([H])([H])C([H])([H])C([H])([H])C([H])([H])C([H])([H])C([H])([H])C([H])([H])C([H])=C([H])C([H])([H])C([H])([H])C([H])([H])C([H])([H])C([H])([H])C([H])([H])[H])C([H])([H])OP(=O)([O-])OC([H])([H])C([H])([H])[N+](C([H])([H])[H])(C([H])([H])[H])C([H])([H])[H]	166.23929 20;168.29491 18;184.20746 2640;208.33014 17;209.05771 17;221.16573 34;225.18396 15;258.24921 33;264.20471 17;269.13141 14;270.36786 216;271.25558 39;285.08185 16;296.40845 41;298.49988 288;299.54999 17;327.14294 14;335.1228 11;339.30078 11;353.06567 35;355.05292 14;357.44904 18;360.91956 13;362.89124 13;363.61823 23;376.25427 12;394.39081 27;405.76379 11;407.2381 11;409.04993 24;410.109…	0.0056563	0.00420703	0.00520337	0.00281805	0.00414345	0.00283251	0.00891623	0.00486075	0.007825	0.00610658	0.00469052	0.0033668	0.00752938	0.0123289	0.00741227	0.0103423	0.0116798	0.00688962	0.00528939	0.00618737	0.011591	0.0143461	0.0140457	0.00894266	0.00506137	0.00968768	0.00752298	0.00566121	0.00928252	0.00967701	0.0122932	0.0141009	0.00935257
386_RPPOS	21.17	524.371	[M+H]+	HMDB10384	5.7793	BMDB=BMDB10384,ChEBI=CHEBI:73858,FooDB=FDB027535,HMDB=HMDB10384,UNPD=UNPD115977,YMDB=YMDB01187	497299	IHNKQIMGVNPMTC-RUZDIDTESA-N	[H]OC([H])(C([H])([H])OC(=O)C([H])([H])C([H])([H])C([H])([H])C([H])([H])C([H])([H])C([H])([H])C([H])([H])C([H])([H])C([H])([H])C([H])([H])C([H])([H])C([H])([H])C([H])([H])C([H])([H])C([H])([H])C([H])([H])C([H])([H])[H])C([H])([H])OP(=O)([O-])OC([H])([H])C([H])([H])[N+](C([H])([H])[H])(C([H])([H])[H])C([H])([H])[H]	HMDB11128	5.7079	BMDB=BMDB11128,ChEBI=CHEBI:76076,FooDB=FDB027907,HMDB=HMDB11128	24779491	IQGPMZRCLCCXAG-RUZDIDTESA-N	[H]OC([H])([H])C([H])(OC(=O)C([H])([H])C([H])([H])C([H])([H])C([H])([H])C([H])([H])C([H])([H])C([H])([H])C([H])([H])C([H])([H])C([H])([H])C([H])([H])C([H])([H])C([H])([H])C([H])([H])C([H])([H])C([H])([H])C([H])([H])[H])C([H])([H])OP(=O)([O-])OC([H])([H])C([H])([H])[N+](C([H])([H])[H])(C([H])([H])[H])C([H])([H])[H]	184.24525 2094;240.16347 15;254.03383 41;258.13452 16;268.23267 17;270.21973 373;271.39807 312;272.62109 12;278.51495 10;282.42896 18;283.06866 28;284.05243 24;296.44629 66;297.33813 22;298.35834 251;299.45267 332;300.46701 12;311.4447 14;320.03766 16;329.36621 11;341.4986 11;355.29395 20;373.09674 11;385.1781 14;396.98981 28;404.7265 10;411.25635 17;419.23468 21;421.43103 11;438.66028 25;447.334…	0.00194868	0.00230513	0.00223338	0.00263761	0.002091	0.00133018	0.00133853	0.00163801	0.00268836	0.00197426	0.00163247	0.00179578	0.00148484	0.00184991	0.00113972	0.00221926	0.0016878	0.00125576	0.00105428	0.00254932	0.00163394	0.00177814	0.00176503	0.00141544	0.000432434	0.000964004	0.000659717	0.000469365	0.000717312	0.000702268	0.00114342	0.00132344	0.000961154
213_HilicPos	5.36	538.52	[M+H]+	HMDB00790; HMDB04949	5.7592	BMDB=BMDB00790; BMDB04949,ChEBI=CHEBI:72959,FooDB=FDB023536; FDB022245,HMDB=HMDB00790; HMDB04949,KNApSAcK=C00031461,PubChem=5283564,UNPD=UNPD216035; UNPD63056	5353456	YDNKGFDKKRUKPY-ORIPQNMZNA-N	[H]OC([H])([H])C([H])(N([H])C(=O)C([H])([H])C([H])([H])C([H])([H])C([H])([H])C([H])([H])C([H])([H])C([H])([H])C([H])([H])C([H])([H])C([H])([H])C([H])([H])C([H])([H])C([H])([H])C([H])([H])C([H])([H])[H])C([H])(O[H])C([H])=C([H])C([H])([H])C([H])([H])C([H])([H])C([H])([H])C([H])([H])C([H])([H])C([H])([H])C([H])([H])C([H])([H])C([H])([H])C([H])([H])C([H])([H])C([H])([H])[H]							171.29559 14;196.71794 14;222.77682 11;227.35449 15;252.03607 13;253.46561 16;257.98685 21;269.97217 15;271.50485 27;280.91476 37;282.31506 105;283.15521 46;293.92877 36;299.16412 13;333.94647 13;403.22235 12;453.48767 14;457.35803 16;464.11749 16;475.46216 22;484.43719 21;485.25354 21;493.37476 11;502.41339 29;503.06122 17;504.86407 58;520.25824 796;521.06952 196;	1.39364e-05	0.000141367	8.96082e-05	3.03592e-05	1.41479e-05	5.88907e-05	6.63506e-05	4.96582e-05	0	9.25416e-07	7.27225e-06	3.652e-05	0	0.000401911	7.97277e-05	3.47042e-05	5.48008e-06	2.34674e-05	0	0	2.51857e-05	4.41881e-05	0	0.000173253	0	0.000106463	5.10367e-05	4.43453e-05	7.4868e-07	0.000359561	0.000177037	0.000598147	0.000429298
394_RPPOS	22.28	531.275	[M+H]+	HMDB34679	5.7487	FooDB=FDB013207,HMDB=HMDB34679	-1	UPEGWQJBOXUCSZ-UHFFFAOYNA-N	[H]OC([H])([H])C6([H])(OC([H])(OC([H])([H])C([H])(C([H])([H])[H])C4([H])(C([H])([H])C1([H])(C5(O[H])(C2([H])(OC(O[H])(C([H])([H])C1(C([H])([H])[H])C3(O[H])(C([H])([H])C([H])([H])C(O[H])(C([H])([H])[H])C23([H])))C45(C([H])([H])[H]))))))C([H])(O[H])C([H])(O[H])C6([H])(O[H]))							151.2229 56;152.35974 12;153.30055 48;155.30811 44;156.27663 23;157.27808 318;159.41843 90;165.51384 84;166.14561 27;167.54869 18;168.2498 18;169.26389 102;171.24324 250;173.27776 10;177.22572 70;179.42606 13;180.60995 50;181.35764 56;183.30449 116;187.14423 200;189.27873 83;190.27217 11;193.33998 17;195.26053 22;196.22961 13;197.18497 16;198.42413 53;199.37125 555;201.29022 22;205.30089 456;207.…	0.00122705	0.00145942	0.00178963	0.00200308	0.00159624	0.001502	0.00221603	0.00119652	0.000725191	0.0014418	0.00117974	0.00137296	0.000852472	0.00141682	0.000720545	0.00110144	0.000677393	0.000590237	0.000441891	0.00144207	0.00106	0.00138727	0.000698111	0.000496709	0.00200631	0.00110641	0.00114637	0.000737524	0.000793326	0.000594715	0.000598978	0.00082098	0.00096983
1156_RPNEG	13.65	447.133	[M-H]-	C00008219	5.7462	ChEBI=CHEBI:81054,FooDB=FDB005846,KNApSAcK=C00008219,PlantCyc=CPD-13510,UNPD=UNPD95870	73607	NEPMMBQHELYZIW-YMTXFHFDSA-N	[H]OC1=C([H])C([H])=C(C([H])=C1([H]))C3([H])(OC4=C([H])C(OC([H])([H])[H])=C([H])C(OC2([H])(OC([H])(C([H])([H])O[H])C([H])(O[H])C([H])(O[H])C2([H])(O[H])))=C4(C(=O)C3([H])([H])))	HMDB29481	5.7325	FooDB=FDB000611,HMDB=HMDB29481,KNApSAcK=C00008222; C00008435; C00029319,UNPD=UNPD19314	-1	KEEWIHDTSNESJZ-UHFFFAOYNA-N	[H]OC=3C([H])=C(OC1([H])(OC([H])(C([H])([H])O[H])C([H])(O[H])C([H])(O[H])C1([H])(O[H])))C([H])=C4OC([H])(C2=C([H])C([H])=C(OC([H])([H])[H])C([H])=C2([H]))C([H])([H])C(=O)C=34	149.16147 835;150.20129 22;159.08859 318;179.24911 252;205.29538 27;211.03351 25;241.09552 82;267.12375 280;271.03076 17;294.90094 12;297.17676 25;302.99341 13;323.0784 26;333.07721 12;337.17368 20;338.44965 13;339.14139 27;342.69916 11;347.18256 939;348.04092 49;362.60086 17;367.18719 75;368.31094 19;383.11877 18;389.45734 10;391.22635 16;409.17847 11;411.29565 30;417.01199 1111;418.03018 145;42…	0.0049304	0.00598004	0.0040901	0.00340657	0.0055907	0.00954638	0.00348783	0.00638089	0.00654408	0.00654051	0.00900195	0.00730922	0.00266985	0.00246126	0.00284354	0.00629566	0.00481444	0.00470679	0.00987487	0.0055275	0.00285943	0.00384819	0.0041326	0.00569017	0.0027736	0.00368121	0.00316199	0.00377236	0.00223691	0.00334584	0.00583952	0.00351738	0.00913513
916_RPNEG	11.47	403.188	[M-H]-	CHEBI:79447	5.7414	ChEBI=CHEBI:79447	252375	YYFCRMZCEYYPDO-SSKFVTQDSA-N	[H]OC1([H])(C([H])([H])C([H])(C(=O)C([H])([H])[H])C2(C([H])([H])[H])(C([H])([H])C([H])([H])C4([H])(C([H])(C12([H]))C([H])(C([H])([H])C3=C([H])C(=O)C([H])([H])C([H])([H])C34(C([H])([H])[H]))SC(=O)C([H])([H])[H])))	CHEBI:61028	4.9638	ChEBI=CHEBI:61028,STOFF=SI00007479	121841	WDLRUFUQRNWCPK-UHFFFAOYSA-N	[H]OC(=O)C([H])([H])N1C([H])([H])C([H])([H])N(C([H])([H])C(=O)O[H])C([H])([H])C([H])([H])N(C([H])([H])C(=O)O[H])C([H])([H])C([H])([H])N(C([H])([H])C(=O)O[H])C([H])([H])C1([H])([H])	149.23607 451;163.12833 22;167.08984 9049;168.37718 19;189.52414 89;195.26129 28;197.09198 37159;198.18301 378;205.32217 4406;206.25851 14;214.0486 20;267.22116 23;269.27441 48;285.16418 1645;299.87454 14;338.92493 24;345.65366 26;	0	0	0	0	0	0	0.0131693	0	0.0027911	0.000375673	0.000410504	0	0.00286575	0.00672505	0.00500211	0.00143088	0.000464412	0.000610685	0	0.00349023	0.00667985	0.00379084	0.0036133	0.000369211	0	0.000413285	0.00271904	0.000448862	0.00472168	0.0080114	0.000260225	0.00111923	0
320_RPPOS	15.71	460.269	[M+H]+	CHEBI:66178	5.7151	ChEBI=CHEBI:66178	54712103	ITWQKCOXYYEWRZ-VOHDXAEZSA-N	[H]OC(=C1C(=O)N([H])C([H])(C1(=O))C([H])([H])C(O[H])(C(=O)OC([H])([H])[H])C([H])([H])[H])C3([H])(C([H])(C([H])=C([H])C2([H])(C([H])([H])C([H])(C([H])([H])[H])C([H])([H])C([H])(C([H])([H])[H])C23([H])))C(=C([H])C([H])([H])[H])C([H])([H])[H])	C00044933	5.5828	ChEBI=CHEBI:31850,KNApSAcK=C00044933,UNPD=UNPD16881	54691339	TURMFSNDIZERMD-FOBKFMRFSA-N	[H]OC1=C(C(=O)C([H])=C([H])C([H])=C([H])C(=C([H])C([H])(C([H])([H])[H])C([H])([H])C([H])(C([H])([H])[H])C([H])([H])C([H])([H])[H])C([H])([H])[H])C(=O)N(O[H])C([H])=C1C2(O[H])(C([H])([H])C([H])([H])C([H])(O[H])C([H])([H])C2([H])([H]))	119.38886 566;127.17049 56;132.54063 18;133.29147 96;135.2272 15;145.25407 31;147.15808 15;151.0692 40;159.22104 12;182.96768 10;247.11603 75;251.31866 29;259.23996 38;272.95236 16;277.08276 101;279.19116 120;281.10263 118;295.12415 579;368.4444 20;397.09143 297;401.30765 22;402.08813 13;404.29306 15;424.75381 41;441.75378 46;443.04666 74;459.3494 11;	0.00185571	0.00229227	0.00262098	0.0020596	0.00230121	0.00267752	0.00289903	0.0032403	0.00230396	0.00244178	0.00208777	0.00215705	0.00226503	0.00178603	0.00344562	0.00218831	0.00204106	0.00438041	0.00156203	0.00208295	0.00233414	0.00144315	0.0022321	0.0025045	0.00371139	0.00161111	0.00301942	0.00342803	0.00320965	0.00207393	0.00218487	0.00195278	0.00203886
148_RPPOS	9.79	256.154	[M+H]+	C00002296	5.6989	ChEBI=CHEBI:6800,KNApSAcK=C00002296,UNPD=UNPD106508; UNPD117940; UNPD198867; UNPD70164; UNPD216011; UNPD218121	5281864	YZFJTFVPCWEPND-UEGMUGDPSA-N	[H]OC2([H])(C([H])(O[H])C1([H])(N(C([H])([H])[H])C2([H])(C([H])([H])C([H])(OC(=O)C(=C([H])C([H])([H])[H])C([H])([H])[H])C1([H])([H]))))	CHEBI:59977	4.8558	ChEBI=CHEBI:59977	13964946	SCHOZSZMRGHVKQ-UHFFFAOYNA-N	[H]OC([H])([H])C([H])(O[H])C([H])(O[H])C=1C([H])=C([H])N(C=1(C([H])=O))C([H])([H])C(C([H])([H])[H])(C([H])([H])[H])C([H])([H])[H]	109.4762 12;111.34532 268;113.88069 19;116.33659 14;154.70006 11;163.33389 19;167.28571 13;179.44484 34;193.0471 50;195.17232 10;196.30899 16;217.78194 35;219.3774 27;220.53543 113;221.2394 260;238.92342 11926;239.63605 11;241.06609 19;254.20869 46;254.92155 32;255.78737 23;	0.000424512	0.000436512	0.000430241	0.000605534	0.000443157	0.000318984	0.000660259	0.000428262	0.000585625	0.000368774	0.00033565	0.000324886	0.00140256	0.000895418	0.000379662	0.000810192	0.000835515	0.000664398	0.00104296	0.00041134	0.000463309	0.000607386	0.00060873	0.000755737	5.37288e-05	0.000480574	0.000350457	0.000340862	0.000279693	0.000204106	0.000400942	0.000250899	0.000354411
30_RPNEG	3.7	131.035	[M-H]-	Pentanedioic acid	5.6938	BMDB=BMDB00661,ChEBI=CHEBI:17859; CHEBI:30921; CHEBI:35907,DrugBank=DB03553,FooDB=FDB001477,HMDB=HMDB00661,KNApSAcK=C00001184,PlantCyc=GLUTARATE,PubChem=743; 4418048,T3DB=T3D4359,UNPD=UNPD195852,STOFF=SI00008942	23322899	JFCQEDHGNNZCLN-UHFFFAOYSA-N	[H]OC(=O)C([H])([H])C([H])([H])C([H])([H])C(=O)O[H]	HMDB06833	5.6224	BMDB=BMDB06833; BMDB06855,ChEBI=CHEBI:16444; CHEBI:18409; CHEBI:57774; CHEBI:58476,ECMDB=ECMDB04002; ECMDB06855,FooDB=FDB024120,HMDB=HMDB06833; HMDB06855,KNApSAcK=C00019658,PlantCyc=2-ACETO-LACTATE,PubChem=440878; 13999770; 22,YMDB=YMDB00394; YMDB00177	440878	NMDWGEGFJUBKLB-UHFFFAOYNA-N	[H]OC(=O)C(O[H])(C(=O)C([H])([H])[H])C([H])([H])[H]	75.4995 24;113.35251 49;	0.000539562	0.000632952	0.000958207	0.000663352	0.000702761	0.000719732	0.00131431	0.00139245	0.00108267	0.000797374	0.00102241	0.000886817	0.00148659	0.00120963	0.00108756	0.00188282	0.00201998	0.00272841	0.00101288	0.0012697	0.00135454	0.00144169	0.00140684	0.00142429	0.00118006	0.00109853	0.00105567	0.00149932	0.000711845	0.000788597	0.00120064	0.00105847	0.00114545
260_RPPOS	15.55	396.186	[M+H]+	C00027697	5.6734	ChEBI=CHEBI:49703,DrugBank=DB08080,KNApSAcK=C00027697,PubChem=6436219,UNPD=UNPD93573; UNPD22187; UNPD151789; UNPD165502; UNPD205091; UNPD209755	6436219	NSHPHXHGRHSMIK-JRIKCGFMSA-N	[H]OC2(OC1([H])(C([H])([H])C([H])([H])C([H])(C([H])=C([H])C([H])([H])C([H])([H])C(=C([H])C(=O)OC([H])(C1([H])([H]))C2([H])([H]))C([H])([H])[H])C([H])([H])[H]))C3([H])(N([H])C(=O)SC3([H])([H]))							174.46077 16;185.30127 11;198.38614 11;206.82227 10;237.017 13;256.34647 10;276.7269 14;278.29321 15;280.30322 15;324.23663 18;333.46051 31;337.46448 22;339.06665 11;377.38211 15;379.26425 20;380.87119 12;	6.61829e-05	0	8.44177e-06	3.17318e-05	3.29954e-05	5.86204e-05	0.000143358	4.11345e-05	4.98539e-05	0.000105096	4.78645e-05	5.94051e-05	0.000221933	0.00086265	0.000823262	0.000516109	0.000402157	0.000304096	0.00127204	8.37759e-05	0.000741805	0.000581118	0.000670119	0.000633102	8.81275e-05	0.000561224	5.34217e-06	6.43359e-05	0.000961907	0.000653664	3.89123e-05	9.68182e-05	0.000467222
355_HilicPos	5.92	860.62	[M+H]+	PC(22:4(7Z,10Z,13Z,16Z)/20:3(8Z,11Z,14Z))	5.6622	BMDB=BMDB08639,HMDB=HMDB08639	52923653	IHBGQJRSQZXBRL-VXGNBSKLSA-N	[H]C(=C([H])C([H])([H])C([H])=C([H])C([H])([H])C([H])([H])C([H])([H])C([H])([H])C([H])([H])[H])C([H])([H])C([H])=C([H])C([H])([H])C([H])=C([H])C([H])([H])C([H])([H])C([H])([H])C([H])([H])C([H])([H])C(=O)OC([H])([H])C([H])(OC(=O)C([H])([H])C([H])([H])C([H])([H])C([H])([H])C([H])([H])C([H])([H])C([H])=C([H])C([H])([H])C([H])=C([H])C([H])([H])C([H])=C([H])C([H])([H])C([H])([H])C([H])([H])C([H])([H])…	PC(20:3(8Z,11Z,14Z)/22:4(7Z,10Z,13Z,16Z))	5.6622	BMDB=BMDB08416,HMDB=HMDB08416	52923267	XPPGOSZKAKPHDY-MYPDBIRBSA-N	[H]C(=C([H])C([H])([H])C([H])=C([H])C([H])([H])C([H])([H])C([H])([H])C([H])([H])C([H])([H])[H])C([H])([H])C([H])=C([H])C([H])([H])C([H])=C([H])C([H])([H])C([H])([H])C([H])([H])C([H])([H])C([H])([H])C(=O)OC([H])(C([H])([H])OC(=O)C([H])([H])C([H])([H])C([H])([H])C([H])([H])C([H])([H])C([H])([H])C([H])=C([H])C([H])([H])C([H])=C([H])C([H])([H])C([H])=C([H])C([H])([H])C([H])([H])C([H])([H])C([H])([H])…	510.11523 10;532.28241 34;596.58441 11;601.40552 13;617.44153 15;784.48804 29;801.35626 71;806.86493 21;814.64484 19;	5.20809e-05	2.76383e-05	0.000193636	4.26036e-05	0.000163574	0	5.5688e-05	0.000316846	0	0.000208222	0	0.000238717	4.14287e-05	0.000277591	8.2744e-05	0.000260212	5.6323e-05	4.03183e-05	0.000102684	0	0.000285709	1.22511e-05	0	1.94834e-05	1.82429e-05	0.000252723	0.00037554	0.000417624	0.000483569	0.00042212	0.000336805	0.000455386	0.000413322
678_RPNEG	8.91	349.105	[M-H]-	HMDB01425	5.6427	BMDB=BMDB01425,ChEBI=CHEBI:17474; CHEBI:60050; CHEBI:8389,DrugBank=DB04574; DB00286,FooDB=FDB021804,HMDB=HMDB01425,PubChem=5284555; 3001028; 4101436; 699; 23667301; 5351489,SMPDB=PW_C001101,UNPD=UNPD112538; UNPD37410; UNPD129875	5284555	JKKFKPJIXZFSSB-CBZIJGRNSA-N	[H]OS(=O)(=O)OC=1C([H])=C([H])C2=C(C=1([H]))C([H])([H])C([H])([H])C3([H])(C2([H])C([H])([H])C([H])([H])C4(C(=O)C([H])([H])C([H])([H])C34([H]))(C([H])([H])[H]))	C00041560	4.6338	ChEBI=CHEBI:65977,KNApSAcK=C00041560,UNPD=UNPD170828	11609971	BKLGAGSBCOUJGV-UHFFFAOYSA-N	[H]OC5=C([H])C(OC([H])([H])[H])=C4C(OC([H])([H])C2=C4(OC=1C=3C([H])=C([H])C(OC=3(C([H])=C([H])C=12))(C([H])([H])[H])C([H])([H])[H]))=C5([H])	125.09573 11;149.38124 58;160.9267 13;221.27786 45;244.96365 19;255.1575 13;311.71094 13;312.97668 339;	0.00041565	0	0	0	8.313e-05	0	0.00161135	0	0.00107924	0.00132499	0.00129245	0.0011674	0.00129516	0.00164041	0.0012308	0.00166829	0.00128932	0.000999331	0.000954436	0.00117107	0.00134259	0.00121619	0.00119846	0.00103661	0.000699718	0.000765886	0.000877226	0.000748016	0.00101758	0.00115493	0.000821506	0.00108261	0.0005048
33_HilicNeg	5.45	213.186	[M-H]-	TRIDECANOIC ACID	5.6344	BMDB=BMDB00910,ChEBI=CHEBI:45919; CHEBI:75084; CHEBI:125832,DrugBank=DB02448,FooDB=FDB010409,HMDB=HMDB00910,KNApSAcK=C00007422,PubChem=12530,T3DB=T3D4604,UNPD=UNPD160409	12530	SZHOJFHSIKHZHA-UHFFFAOYSA-N	[H]OC(=O)C([H])([H])C([H])([H])C([H])([H])C([H])([H])C([H])([H])C([H])([H])C([H])([H])C([H])([H])C([H])([H])C([H])([H])C([H])([H])C([H])([H])[H]	CHEBI:84872	5.3844	ChEBI=CHEBI:84872,UNPD=UNPD33721	3014565	YETWOCQNUTWSQA-UHFFFAOYNA-N	[H]OC(=O)C([H])([H])C([H])([H])C([H])([H])C([H])([H])C([H])([H])C([H])([H])C([H])([H])C([H])([H])C([H])(C([H])([H])[H])C([H])([H])C([H])([H])[H]	93.44661 16;111.53738 23;139.49681 13;149.3802 39;153.52802 20;185.15993 13;190.70299 12;194.97781 70;195.75484 16;198.37021 29;	4.27839e-05	0.000100505	0.000180398	0	0	2.33399e-05	0.000157777	0.000117762	0	8.03982e-05	8.64895e-05	7.23456e-05	0.00211979	0.00173194	0	0.00174031	0.00211282	1.70045e-05	0.00174334	0	0.00208083	0.000395713	0	0.00022327	0.000229348	0.00209179	0.000423906	7.2098e-05	0.000111539	8.39729e-05	0.000139052	0.000113271	0.000259639
193_HilicPos	12.16	494.325	[M+H]+	1-(9Z-hexadecenoyl)-sn-glycero-3-phosphocholine	5.6294	BMDB=BMDB10383,ChEBI=CHEBI:73851; CHEBI:84752,FooDB=FDB027534,HMDB=HMDB10383,UNPD=UNPD157409,YMDB=YMDB01184; YMDB02210	24779461	LFUDDCMNKWEORN-ZXEGGCGDSA-N	[H]OC([H])(C([H])([H])OC(=O)C([H])([H])C([H])([H])C([H])([H])C([H])([H])C([H])([H])C([H])([H])C([H])([H])C([H])=C([H])C([H])([H])C([H])([H])C([H])([H])C([H])([H])C([H])([H])C([H])([H])[H])C([H])([H])OP(=O)([O-])OC([H])([H])C([H])([H])[N+](C([H])([H])[H])(C([H])([H])[H])C([H])([H])[H]							167.95749 11;183.94623 447;420.24969 26;434.08456 17;476.22882 1064;	0.000372302	0.000266781	0.000409169	0.000162034	0.000900988	0.000299575	0.000364267	0.000184369	0	0.000395365	0.000232358	0.000126932	0.000654323	0.000877518	0.000539602	0.00078608	0.000685912	0.000213846	0.000143405	0	0.00112361	0.00058995	0	0.000445633	0.000214276	0.000961124	0.00036732	0.00024151	0.000544892	0.00047526	0.000941782	0.000575579	0.000375985
87_RPPOS	1.3	184.073	[M+H]+	HMDB01565	5.6179	BMDB=BMDB01565,ChEBI=CHEBI:61040; CHEBI:18132; CHEBI:295975,DrugBank=DB03945,HMDB=HMDB01565,KNApSAcK=C00007299,PlantCyc=PHOSPHORYL-CHOLINE,PubChem=7886; 1014; 3330960,SMPDB=PW_C001202,UNPD=UNPD133926; UNPD96257,YMDB=YMDB00191	135437	YHHSONZFOIEMCP-UHFFFAOYSA-N	[H]OP(=O)([O-])OC([H])([H])C([H])([H])[N+](C([H])([H])[H])(C([H])([H])[H])C([H])([H])[H]	DB06906	5.0284	ChEBI=CHEBI:39721,DrugBank=DB06906,PubChem=84894	84894	HRRHGLKNOJHIGY-UHFFFAOYSA-N	[H]OC1=NC(=NC([H])=C1(C(=O)OC([H])([H])C([H])([H])[H]))N([H])[H]	60.52762 272;71.46342 194;81.6246 11;86.43959 2347;99.23172 26;100.41338 30;104.52048 40;115.12379 13;121.19403 22;125.13855 1001;126.05956 21;127.47699 11;143.16936 91;151.99545 24;153.68044 38;154.30403 10;160.95428 19;165.74013 145;166.42151 220;167.3029 124;167.95427 14;174.8492 58;	0.000458693	0.000530435	0.000626877	0.000775455	0.000585997	0.000538527	0.00118447	0.00098415	0.000554466	0.00171973	0.000867002	0.000800842	0.00163372	0.00120732	0.00324847	0.0013975	0.00131182	0.00270263	0.00122717	0.000884074	0.00121204	0.00162547	0.00126741	0.00114938	0.00315724	0.00207531	0.00287506	0.00287593	0.00192068	0.00205158	0.00144077	0.00163209	0.00184258
328_RPPOS	13.82	468.191	[M+H]+	HMDB31949	5.6166	FooDB=FDB008640,HMDB=HMDB31949,UNPD=UNPD24194	-1	GTQXJGMYZPFFKR-UHFFFAOYNA-N	[H]OC(=NC([H])([H])C2=C([H])C([H])=C(OC1([H])(OC([H])(C([H])([H])[H])C([H])(OC(=O)C([H])([H])[H])C([H])(OC(=O)C([H])([H])[H])C1([H])(OC(=O)C([H])([H])[H])))C([H])=C2([H]))OC([H])([H])C([H])([H])[H]	HMDB61123	5.3166	HMDB=HMDB61123,SMPDB=PW_C040669	-1	CFSXIBDXCWVFJR-QPLCGJKRSA-N	[H]OS(=O)(=O)OC1=C([H])C([H])=C(C([H])=C1([H]))C(C2=C([H])C([H])=C(OC([H])([H])C([H])([H])N(C([H])([H])[H])C([H])([H])[H])C([H])=C2([H]))=C(C3=C([H])C([H])=C([H])C([H])=C3([H]))C([H])([H])C([H])([H])[H]	159.36971 15;181.31073 21;201.09612 12;220.96288 23;237.25281 10;247.96555 14;253.40393 23;279.27039 20;283.33755 33;294.28253 11;295.36798 18;296.31415 12;321.28 13;335.258 16;339.54608 24;350.71149 60;358.65277 26;373.26822 32;379.2666 22;394.13824 28;395.92813 16;407.1665 72;433.24063 11;437.9295 12;441.31619 21;449.45123 104;450.54556 922;451.15692 10347;453.62485 58;	0.0017267	0.00125332	0.00158023	0.00184884	0.00145124	0.00084711	0.00195537	0.00112516	0.00137115	0.00187446	0.000960429	0.000856975	0.00797154	0.00789484	0.00783512	0.00617107	0.00298253	0.00278504	0.00742284	0.001052	0.00406676	0.00545342	0.00649417	0.0069894	0.000937287	0.00124428	0.00214474	0.000406644	0.00415618	0.00247328	0.0020756	0.000561829	0.00275866
408_RPPOS	7.37	564.359	[M+H]+	CHEBI:78044	5.6125	ChEBI=CHEBI:78044	24778943	WHHNGIKQIRHPSY-ZYRNGQCSSA-N	[H]C(=C([H])C([H])([H])C([H])([H])C([H])([H])C([H])([H])C([H])([H])C([H])([H])C([H])([H])C([H])([H])[H])C([H])([H])C([H])([H])C([H])([H])C([H])([H])C([H])([H])C([H])([H])C([H])([H])C(=O)OC([H])([H])C([H])(OC(=O)C([H])([H])[H])C([H])([H])OP(=O)([O-])OC([H])([H])C([H])([H])[N+](C([H])([H])[H])(C([H])([H])[H])C([H])([H])[H]							176.90196 57;177.62735 14;218.49246 21;221.0199 32;223.31398 14;238.0807 15;239.40401 11;265.1882 31;282.87973 21;309.17987 27;311.12 14;327.31165 10;352.59247 14;353.28156 34;371.3988 14;379.57343 18;396.90015 46;441.02551 42;455.36139 21;459.21246 65;470.93805 26;492.84296 37;502.74036 25;503.44763 20;528.18622 42;529.11249 26;547.0224 4179;547.68829 49;	0.000187507	0.000226675	0.000234959	0.00023164	0.000222412	0.000231279	0.000208988	0.00032461	0.000257284	0.000223063	0.000405111	0.000383828	0.000372835	0.000172392	0.000327615	0.000190288	0.000309685	0.00035717	0.000417859	0.000286108	0.000283907	0.000260816	0.000237594	0.000267183	0.000265929	0.000238132	0.000259284	0.000219953	0.000202156	0.000202095	0.000299834	0.000230406	0.00022384
436_RPPOS	20.15	634.454	[M+H]+	HMDB08822	5.6087	BMDB=BMDB08822,HMDB=HMDB08822	52924113	KKYHRRVXUVMRJB-QPLOXXCYSA-N	[H]OP(=O)(OC([H])([H])C([H])([H])N([H])[H])OC([H])([H])C([H])(OC(=O)C([H])([H])C([H])([H])C([H])([H])C([H])([H])C([H])([H])C([H])([H])C([H])([H])C([H])=C([H])C([H])([H])C([H])([H])C([H])([H])C([H])([H])[H])C([H])([H])OC(=O)C([H])([H])C([H])([H])C([H])([H])C([H])([H])C([H])([H])C([H])([H])C([H])([H])C([H])([H])C([H])([H])C([H])([H])C([H])([H])C([H])([H])C([H])([H])[H]	HMDB08854	5.5208	BMDB=BMDB08854,HMDB=HMDB08854	52924129	FGWIVUFUAVCXMN-HEDIVAJHSA-N	[H]OP(=O)(OC([H])([H])C([H])([H])N([H])[H])OC([H])([H])C([H])(OC(=O)C([H])([H])C([H])([H])C([H])([H])C([H])([H])C([H])([H])C([H])([H])C([H])([H])C([H])([H])C([H])([H])C([H])([H])C([H])([H])C([H])([H])C([H])([H])[H])C([H])([H])OC(=O)C([H])([H])C([H])([H])C([H])([H])C([H])([H])C([H])([H])C([H])([H])C([H])([H])C([H])=C([H])C([H])([H])C([H])([H])C([H])([H])C([H])([H])[H]	188.29036 16;189.285 17;190.11285 10;191.18982 37;192.64703 22;193.35217 19;199.39842 11;207.22414 13;208.85301 74;211.17381 76;214.20195 12;215.02087 14;216.90601 72;218.51001 44;219.39458 15;220.23459 15;221.21693 215;235.20688 122;237.17844 46;239.24214 39;243.37653 12;247.21254 339;253.04868 36;255.23033 128;261.15732 18;263.06433 24;265.07367 259;267.01642 33;271.20596 37;273.14206 99;278.92…	0.00882049	0.00555601	0.00315427	0.00277808	0.00442623	0.00182231	0.000599206	0.00103224	0.00531779	0.00145543	0.00108964	0.00642118	0.00163694	0.000597071	0.000863144	0.00289069	0.0050314	0.00205064	0.000644826	0.000710339	0.000620992	0.000618875	0.000628221	0.000765955	0.00131982	0.000801755	0.000706452	0.00150348	0.00105978	0.00108317	0.00241217	0.00237541	0.00128791
203_RPPOS	5.92	316.212	[M+H]+	CHEBI:31326	5.5965	ChEBI=CHEBI:31326	2486	CQONVBIGUJWUFE-UHFFFAOYNA-N	[H]OC(=O)C([H])([H])C([H])([H])C(=O)OC([H])(C([H])([H])[H])C([H])([H])C(=O)N([H])C([H])([H])C([H])(C([H])([H])C([H])([H])[H])C([H])([H])C([H])([H])C([H])([H])C([H])([H])[H]							95.64 22;102.36575 3856;103.28217 10;113.28624 11;115.41464 170;123.31891 816;128.3313 117;133.12848 102;137.32968 18;142.31036 16;155.35178 27;163.37755 21;175.35004 26;183.90283 165;185.2477 31;186.41162 12;236.90277 14;241.20526 17;251.19025 24;255.22284 32;257.06042 11;259.43445 21;260.13483 23;264.13525 15;281.0611 43;285.74359 39;288.05121 15;292.53033 21;298.01389 100;299.08133 220;315.724…	0.000662021	0.000410104	0.000721373	0.000795592	0.000616741	0.000494616	8.55602e-05	0.000507026	0.000986132	0.000515067	0.000556355	0.000357818	0.000157724	0.000134712	9.07808e-05	3.82475e-05	0.000162179	4.51573e-05	0.000211733	0.000800385	1.37006e-05	2.32915e-05	9.94364e-05	5.59786e-05	4.49618e-05	0.000582889	0.000207573	0.000238635	0.00025797	0.000218573	0.000462351	0.000246447	0.000433854
286_RPPOS	22.59	425.288	[M+H]+	C00045620	5.5793	ChEBI=CHEBI:66415,KNApSAcK=C00045620,UNPD=UNPD54834; UNPD19536	21776156	UCWHHFGTUDDROG-DNKDVBPTSA-N	[H]OC(=O)C([H])(C([H])([H])[H])C1([H])(OOC(C([H])([H])[H])(C([H])([H])C([H])([H])C([H])=C(C([H])([H])[H])C([H])([H])C([H])([H])C(=O)C(C([H])([H])[H])(C([H])([H])[H])C([H])([H])C([H])([H])C([H])([H])C(=O)C([H])([H])[H])C([H])([H])C1([H])([H]))	CHEBI:81246	5.3966	ChEBI=CHEBI:81246,PubChem=193429	193429	UJYLRDMHTJWIQW-SWSYAYITSA-N	[H]OC(=O)C([H])(O[H])C([H])([H])C([H])(C([H])([H])[H])C2([H])(C([H])([H])C([H])([H])C3([H])(C4([H])(C([H])(O[H])C([H])([H])C1([H])(C([H])([H])C([H])(O[H])C([H])([H])C([H])([H])C1(C([H])([H])[H])C4([H])(C([H])([H])C([H])(O[H])C23(C([H])([H])[H]))))))	171.29309 14;172.31583 131;184.48239 11;185.28653 16;197.00856 16;224.13332 13;239.29468 267;239.95432 88;244.4924 35;254.86948 78;255.52081 31;256.58023 119;281.18829 301;282.31528 76;283.35852 28;284.26614 818;285.33856 147;293.43011 82;297.02368 85;299.24954 175;308.80621 43;312.43637 339;313.50763 46;316.53864 63;356.81073 70;361.4549 22;365.07828 72;367.39026 14;386.81491 46;391.87769 34;397…	0.000994495	0.00117465	0.00126113	0.00200806	0.00131722	0.00114779	0.00255027	0.00120631	0.00124978	0.00183726	0.00142325	0.00132065	0.00108202	0.00382362	0.000889523	0.00144732	0.00171816	0.000974106	0.00312097	0.00111658	0.00247997	0.00310554	0.00249541	0.00288859	0.00217314	0.00157511	0.00147832	0.00236176	0.0017534	0.00162121	0.00104483	0.00135907	0.00156839
452_RPPOS	22.47	686.359	[M+H]+	C00001617	5.5701	ChEBI=CHEBI:2934,KNApSAcK=C00001617,UNPD=UNPD134001	441710	ZBALYAJAWGGUCX-OVHFASGNSA-N	[H]OC26(C([H])(OC([H])([H])[H])C7([H])(C3(C([H])([H])OC(=O)C1=C([H])C([H])=C([H])C([H])=C1N([H])C(=O)C([H])([H])C([H])([H])C(=O)N([H])[H])(C([H])([H])N(C([H])([H])C([H])([H])[H])C2([H])C7(C([H])(OC([H])([H])[H])C([H])([H])C3([H])([H]))(C5([H])(C([H])([H])C4([H])(C([H])(OC([H])([H])[H])C([H])([H])C6(O[H])(C5([H])(C4([H])(OC([H])([H])[H])))))))))	DB04353	5.139	DrugBank=DB04353,PubChem=46936955	46936955	DDOOHEYBNHOFCV-QNRWOPMTSA-N	[H]C1=C([H])C([H])=C(C([H])=C1([H]))C([H])([H])C([H])(C(=O)N([H])[H])N([H])C(=O)C([H])(N([H])C(=O)C([H])(C([H])([H])C(=O)C([H])(N([H])C(=O)OC(C([H])([H])[H])(C([H])([H])[H])C([H])([H])[H])C([H])([H])C2=C([H])C([H])=C([H])C([H])=C2([H]))C([H])([H])C3=C([H])C([H])=C([H])C([H])=C3([H]))C([H])([H])C([H])([H])C(=O)N([H])[H]	221.22455 45;278.29242 24;303.15823 15;307.09271 15;327.28946 24;341.19574 11;343.03748 11;354.34222 43;358.80505 23;371.12457 54;387.32239 13;389.35693 12;400.35547 32;404.74255 11;411.0332 44;414.41028 15;420.08533 15;429.31073 11;439.23816 16;445.08972 16;459.25769 64;463.12549 11;473.6731 44;475.27814 21;478.50262 27;484.36292 11;487.07574 36;499.25433 10;502.27917 20;503.10724 27;504.4624 43…	0.00130939	0.00146456	0.0022719	0.000903276	0.00174848	0.00279325	0.00130523	0.000629434	0.00478472	0.0028276	0.00189591	0.00161871	0.00262791	0.0018195	0.00121752	0.00246339	0.00290917	0.00132056	0.0020265	0.00356602	0.000639044	0.00113268	0.00170106	0.0022699	0.000340045	0.000844468	0.000538289	0.000387162	0.000574201	0.00108961	0.00169345	0.00275777	0.000756892
21_RPPOS	15.69	119.085	[M+H]+	L-Alanine, 3-(methylamino)-	5.5387	ChEBI=CHEBI:73169,KNApSAcK=C00001380,T3DB=T3D3082,UNPD=UNPD169359	105089	UJVHVMNGOZXSOZ-VKHMYHEASA-N	[H]OC(=O)C([H])(N([H])[H])C([H])([H])N([H])C([H])([H])[H]	1H-Indene, 2,3-dihydro-	5.4115	ChEBI=CHEBI:37911,HMDB=HMDB59837,UNPD=UNPD173456	10326	PQNFLJBBNBOBRQ-UHFFFAOYSA-N	[H]C1=C([H])C([H])=C2C(=C1([H]))C([H])([H])C([H])([H])C2([H])([H])	91.30612 64;103.42336 41;	0.00142024	0.00175075	0.00170436	0.00171565	0.00168409	0.00182946	0.00210259	0.00181452	0.00108539	0.00158637	0.00197047	0.00191262	0.00136571	0.001369	0.0014934	0.00155899	0.00155683	0.00171634	0.000743309	0.00237362	0.00147588	0.0022075	0.00231732	0.00167777	0.00310806	0.00136306	0.00239828	0.00220079	0.0011688	0.00140018	0.00170416	0.00238652	0.00226188
245_RPPOS	15.5	372.244	[M+H]+	CHEBI:67716	5.53	ChEBI=CHEBI:67716,UNPD=UNPD201462	53355802	MFYNPKUAXIUSHE-IEGXLHPXSA-N	[H]C2=C1C([H])([H])C([H])(N([H])C(=O)C([H])([H])[H])C([H])([H])C([H])([H])C1(C([H])([H])[H])C3([H])(C([H])([H])C([H])([H])C45(C(=O)OC([H])(C([H])([H])[H])C5([H])(C([H])([H])C([H])([H])C4([H])(C3([H])(C2([H])([H]))))))							118.32951 88;134.46489 152;148.46997 159;184.74498 166;194.99718 181;199.22305 73;206.14523 42;207.38589 159;208.1785 662;209.20206 20;220.79211 294;221.60294 125;222.27817 168;223.10831 88;232.95157 48;235.96188 2522;237.16403 631;238.18582 27;240.70831 190;241.83203 131;251.25598 16180;252.26831 2470;253.2648 219;258.92648 236;260.4469 306;267.35101 54;268.52652 187;269.2312 13;273.32153 116;27…	0.00538774	0.00482198	0.00335054	0.00494864	0.004262	0.00280109	0	0.00524564	0.00756295	0.0044563	0.00343948	0.00472862	0	0	0	0	0	0	0	0.00506977	0	0	0	0	0.000690471	0.00305453	0.00158417	0.000883611	0.00159172	0.00113473	0.00186665	0.00153786	0.00143861
502_RPPOS	20.34	864.627	[M+H]+	HMDB12316	5.5252	BMDB=BMDB12316,ChEBI=CHEBI:75973; CHEBI:76098; CHEBI:83899,HMDB=HMDB12316	24779582	UAKYQMHTPLVMJD-GJOJTGTQSA-N	[H]OC([H])([H])C1([H])(OC([H])(OC([H])([H])C([H])(N([H])C(=O)C([H])([H])C([H])([H])C([H])([H])C([H])([H])C([H])([H])C([H])([H])C([H])([H])C([H])([H])C([H])([H])C([H])([H])C([H])([H])C([H])([H])C([H])([H])C([H])([H])C([H])([H])C([H])([H])C([H])([H])C([H])([H])C([H])([H])C([H])([H])C([H])([H])[H])C([H])(O[H])C([H])=C([H])C([H])([H])C([H])([H])C([H])([H])C([H])([H])C([H])([H])C([H])([H])C([H])([H])C…							265.03525 119;283.25909 53;289.034 18;291.01849 29;307.1181 58;308.45871 73;309.104 229;309.87976 12;311.08893 71;313.26624 27;327.04221 60;329.18027 52;340.13461 21;352.96365 315;355.0481 45;371.16675 108;376.59161 18;397.02466 293;399.29437 33;415.10376 120;427.02319 25;439.02258 20;440.04041 15;441.08643 240;443.23077 17;456.09302 16;459.2666 136;470.74854 17;472.13098 19;477.1615 72;484.87982…	0.000891033	0.000894315	0.000922252	0.00131289	0.00100635	0.00101127	0.000825615	0.000907268	0.00120775	0.000896518	0.000922623	0.000955591	0.00154427	0.00140849	0.00062957	0.0008163	0.00161717	0.000539754	0.00159422	0.00118412	0.000980047	0.00120487	0.00100555	0.00155175	0.000956086	0.00136494	0.000806012	0.000391105	0.000841967	0.000736952	0.000667089	0.000289394	0.000728353
457_RPNEG	8.76	333.11	[M-H]-	HMDB34937	5.5109	FooDB=FDB013529,HMDB=HMDB34937,KNApSAcK=C00026883,UNPD=UNPD112525	-1	ZVFUTZQNUQUJLW-UHFFFAOYNA-N	[H]OC([H])([H])C3([H])(OC([H])(OC1=C([H])C([H])=C([H])C2=C1C(=C([H])N2([H]))C([H])([H])C#N)C([H])(O[H])C([H])(O[H])C3([H])(O[H]))	MitoExtra	4.4584	ChEBI=CHEBI:27504,DrugBank=DB00305,HMDB=HMDB14450,KNApSAcK=C00018668,PubChem=5746,T3DB=T3D2743,UNPD=UNPD160373; UNPD170975; UNPD186892,STOFF=SI00008636	5746	NWIBSHFKIJFRCO-WUDYKRTCSA-N	[H]N([H])C(=O)OC([H])([H])C4([H])(C=1C(=O)C(=C(C(=O)C=1N3C([H])([H])C2([H])(N([H])C2([H])C34(OC([H])([H])[H])))C([H])([H])[H])N([H])[H])	161.02466 14;176.57637 11;229.3121 19;255.22842 158;296.97986 62;313.19934 43;	0.0639582	0.0725129	0.0738598	0.0799296	0.0766847	0.093163	0.00162566	0.0941675	0.0542643	0.0825938	0.0526299	0.0403047	0.0220491	0.0104661	0.00457567	0.0280273	0.0363654	0.0323929	0.0308807	0.0176002	0.00705566	0.0148643	0.0189974	0.0350723	0.0327546	0.0265225	0.0213463	0.0241953	0.0151177	0.00814155	0.0204995	0.0141648	0.0110566
120_RPNEG	6.46	215.092	[M-H]-	Decanedioic acid, 4-oxo-	5.5105	DrugBank=DB02260,PubChem=1755	1755	XTQIBFVBYWIHIP-UHFFFAOYSA-N	[H]OC(=O)C([H])([H])C([H])([H])C(=O)C([H])([H])C([H])([H])C([H])([H])C([H])([H])C([H])([H])C(=O)O[H]	HMDB35665	4.9232	FooDB=FDB014381,HMDB=HMDB35665,KNApSAcK=C00026660,UNPD=UNPD33054	-1	FSNCEEGOMTYXKY-UHFFFAOYNA-N	[H]OC(=O)C3([H])(N([H])C([H])([H])C2=C(C1=C([H])C([H])=C([H])C([H])=C1N2([H]))C3([H])([H]))	57.50418 18;83.46178 20;84.4017 16;87.51192 16;101.45549 14;111.38702 92;125.36447 666;127.44699 16;135.30888 19;140.14037 16;143.205 26;153.35124 555;157.12234 27;195.0517 11;197.09676 221;	0	0	0	0	0	0	8.81469e-05	0	0.000305832	0.000283522	0.00056514	0.000592353	0.00119552	0.000440742	0.000319553	0.00086306	0.0015777	0.000985177	0.000311104	0.000326467	0.000299872	0.000368426	0.000345131	0.000367095	0.000345443	0.000244596	0.000385917	0.000666805	0.000174269	0.000498473	0.00041693	0.000361056	0.000454083
29_HilicNeg	5.42	205.16	[M-H]-	HMDB31738	5.5014	FooDB=FDB008406,HMDB=HMDB31738,T3DB=T3D4853,YMDB=YMDB01634,STOFF=SI00002737	-1	JRJBVWJSTHECJK-PKNBQFBNNA-N	[H]C(=C(C(=O)C([H])([H])[H])C([H])([H])[H])C1([H])(C(=C([H])C([H])([H])C([H])([H])C1(C([H])([H])[H])(C([H])([H])[H]))C([H])([H])[H])	(+)-trans-alpha-Irone	5.5014	ChEBI=CHEBI:62; CHEBI:10284,FooDB=FDB014339,HMDB=HMDB35631,KNApSAcK=C00003153; C00003154,UNPD=UNPD46485; UNPD178530; UNPD87864	5281905	JZQOJFLIJNRDHK-SXDPYWSBSA-N	[H]C(=C([H])C1([H])(C(=C([H])C([H])([H])C([H])(C([H])([H])[H])C1(C([H])([H])[H])(C([H])([H])[H]))C([H])([H])[H]))C(=O)C([H])([H])[H]	134.2137 27;189.30666 161;196.38908 14;	0.00227831	0.00221282	0.0021965	0.00217196	0.00286052	0.00245791	0.00295824	0.00262104	0	0.00342848	0.00291036	0.0025943	0.00410897	0.00658521	0.00467016	0.00438946	0.00359167	0.00298797	0.00820487	0.000428548	0.00829432	0.000428472	0.0202035	0.00620985	0.00395932	0.0051363	0.00421927	0.00533795	0.00586498	0.00594132	0.00467564	0.00477888	0.00464249
17_HilicNeg	7.46	163.061	[M-H]-	L-fucopyranose	5.4972	BMDB=BMDB00174; BMDB00849; BMDB03081,ChEBI=CHEBI:2181; CHEBI:27442; CHEBI:27586; CHEBI:27907; CHEBI:42589; CHEBI:42606; CHEBI:2179; CHEBI:42548; CHEBI:42564; CHEBI:62346; CHEBI:63151; CHEBI:63152,DrugBank=DB04062; DB03283; DB04473; DB03485; DB03773,ECMDB=ECMDB00849; ECMDB00174; ECMDB20264,FooDB=FDB023106,HMDB=HMDB00174; HMDB00849; HMDB03081; HMDB29196; HMDB59625,KNApSAcK=C00001118; C00001128,Plan…	17106	SHZGCJCMOBCMKK-DHVFOXMCSA-N	[H]OC1([H])(OC([H])(C([H])([H])[H])C([H])(O[H])C([H])(O[H])C1([H])(O[H]))	1,5-Anhydro-D-glucitol	5.3224	BMDB=BMDB02712,ChEBI=CHEBI:16070; CHEBI:49182,FooDB=FDB023050,HMDB=HMDB02712,PlantCyc=CPD-9446,PubChem=445184,UNPD=UNPD174220; UNPD175455; UNPD33889; UNPD46982	64960	MPCAJMNYNOGXPB-SLPGGIOYSA-N	[H]OC([H])([H])C1([H])(OC([H])([H])C([H])(O[H])C([H])(O[H])C1([H])(O[H]))	55.67585 40;57.1528 20;57.93502 19;59.5771 239;71.39664 345;73.31921 203;73.96806 16;81.65056 19;83.42671 26;85.39726 341;88.549 64;89.45567 240;91.38387 29;95.32446 43;97.53616 73;99.24361 24;101.34975 1977;102.78275 12;103.46828 41;109.63127 12;113.49699 25;127.26012 252;130.05876 40;131.19266 929;143.21178 317;145.26299 95;	0.0223943	0.0221261	0.0253506	0.0268742	0.0212941	0.0209614	0.0235062	0.0237753	0	0.0281189	0.0259801	0.0239075	0.0168333	0.0059335	0.00253394	0.0158898	0.0219536	0.0169723	0.0104887	0	0.00390456	0	0	0.0213776	0.0339951	0.0232417	0.0210064	0.0188133	0.0139299	0.00642967	0.0168994	0.0123797	0.0104758
114_RPPOS	1.31	205.068	[M+H]+	HMDB41031	5.4884	FooDB=FDB020901,HMDB=HMDB41031,UNPD=UNPD60670	-1	OPIUUJWCOWMEJN-UHFFFAOYNA-N	[H]OC1=C(OC([H])([H])[H])C(=O)C([H])(O[H])C(O[H])(C([H])([H])O[H])C1([H])([H])	CHEBI:81688	5.3607	ChEBI=CHEBI:81688	54694369	GXRFOOHMMLYYNW-UJURSFKZSA-N	[H]OC1=C(OC([H])([H])C([H])([H])[H])C(=O)OC1([H])C([H])(O[H])C([H])([H])O[H]	79.31664 10;85.29262 140;86.29228 23;102.30855 28;121.22334 12;122.3024 11;128.20639 20;134.12798 27;135.32903 19;141.41515 15;144.18726 14;145.18544 27;145.8513 16;164.06506 19;170.21895 15;173.13269 20;178.46359 17;186.37779 15;187.36349 33;188.06136 100;190.97838 33;	0.000136819	0.000118114	0.000131163	8.41217e-05	0.000118226	0.000120912	0.000313228	0.000106938	9.77775e-05	0.000245195	0.00012918	0.000101621	0.000910721	0.000908225	0.000832583	0.000519334	0.000340126	0.000249279	0.000990235	7.51003e-05	0.000845879	0.00117114	0.000786213	0.000678149	0.000339531	0.000412399	0.000364299	0.000240661	0.000510809	0.000501755	7.13234e-05	7.71733e-05	0.000351856
508_RPPOS	22.58	892.66	[M+H]+	HMDB00024	5.4873	BMDB=BMDB00024,ChEBI=CHEBI:60361; CHEBI:75974; CHEBI:83877,HMDB=HMDB00024,PubChem=6451121,SMPDB=PW_C000017,UNPD=UNPD99018	6451121	MEAZTWJVOWHKJM-CIAPRIGGSA-N	[H]OC([H])([H])C1([H])(OC([H])(OC([H])([H])C([H])(N([H])C(=O)C([H])([H])C([H])([H])C([H])([H])C([H])([H])C([H])([H])C([H])([H])C([H])([H])C([H])([H])C([H])([H])C([H])([H])C([H])([H])C([H])([H])C([H])([H])C([H])([H])C([H])([H])C([H])([H])C([H])([H])C([H])([H])C([H])([H])C([H])([H])C([H])([H])C([H])([H])C([H])([H])[H])C([H])(O[H])C([H])=C([H])C([H])([H])C([H])([H])C([H])([H])C([H])([H])C([H])([H])C…							251.13736 24;254.18501 18;264.05441 34;264.94635 49;269.23923 15;277.15854 37;279.30252 15;295.34735 17;297.31381 18;299.39862 36;305.13495 11;308.92285 139;309.63409 27;311.13153 70;313.24036 47;315.52216 13;321.0694 42;326.58771 16;327.30463 54;328.88104 12;337.04968 22;339.00854 69;341.09766 71;350.71518 13;352.45331 72;353.14352 109;355.0788 26;357.32858 12;370.00183 41;371.26074 36;373.18298…	0	0.000634458	0.000114897	0.00101985	0.00035384	0	0.000592669	0.000400206	0	0	0.000681465	0.000565465	0	0.000850627	0.000603578	0.000585769	0.00105885	0.000547328	0.000902248	0.000351118	0.000631169	0	0.000557094	0.000843035	0.000781514	0.000862095	0.00066889	0.000216061	0.000112075	0.000559885	0.000525625	0.000410178	0.000662105
265_RPPOS	22.58	403.32	[M+H]+	CHEBI:68040	5.4624	ChEBI=CHEBI:68040,UNPD=UNPD171656	52951401	BIJAKZXAJWXIHK-GLJICWRDSA-N	[H]OC4([H])(C([H])([H])C2([H])(C(C([H])([H])[H])(C([H])([H])C([H])([H])C1([H])(C(C([H])([H])[H])(C([H])([H])[H])C([H])([H])C([H])([H])C([H])([H])C12(C([H])([H])[H])))C5([H])(C([H])([H])C([H])=C3C([H])([H])OC([H])(OC([H])([H])[H])C3([H])C45(C([H])([H])[H]))))	HMDB29458	5.389	FooDB=FDB000579,HMDB=HMDB29458	58114970	QZCTXVLQHKKTGL-UHFFFAOYSA-N	[H]C([H])=C([H])C([H])([H])C=1C([H])=C([H])C(OC(=O)C([H])([H])C([H])([H])C([H])([H])C([H])([H])C([H])([H])C([H])([H])C([H])([H])C([H])([H])C([H])([H])C([H])([H])C([H])([H])C([H])([H])C([H])([H])C([H])([H])C([H])([H])[H])=C(OC([H])([H])[H])C=1([H])	171.37723 28;177.48898 15;206.07036 11;221.11096 11;223.09616 13;235.24606 23;247.15683 12;247.9487 25;275.26361 12;276.5087 11;283.27594 83;284.56686 36;286.04126 13;287.23877 19;291.04398 43;306.87537 16;310.51669 11;313.18005 34;315.84863 43;345.29871 41;347.19519 23;366.52386 44;367.92365 17;375.54852 14;384.97366 50;386.19717 103;388.19095 22;402.92233 31;	0	0	0	0	0	0	0.000177316	4.79493e-06	0.000127097	0	7.80014e-05	0	0.000252892	0.000275755	0	0.000192544	0.000336219	0.000112699	0.000260262	1.16114e-05	0.000185888	0.000317699	0.000228104	0.000335999	0	0.000187325	1.96286e-05	0	8.71236e-05	5.46445e-05	0	0.000258679	5.99064e-05
350_HilicPos	5.96	834.604	[M+H]+	Phosphatidylcholine(18:0/22:6)	5.4577	BMDB=BMDB08057,ChEBI=CHEBI:84829,HMDB=HMDB08057	24778876	FAUYAENFVCNTAL-PFFNLMTBSA-N	[H]C(=C([H])C([H])([H])C([H])=C([H])C([H])([H])C([H])=C([H])C([H])([H])C([H])([H])[H])C([H])([H])C([H])=C([H])C([H])([H])C([H])=C([H])C([H])([H])C([H])=C([H])C([H])([H])C([H])([H])C(=O)OC([H])(C([H])([H])OC(=O)C([H])([H])C([H])([H])C([H])([H])C([H])([H])C([H])([H])C([H])([H])C([H])([H])C([H])([H])C([H])([H])C([H])([H])C([H])([H])C([H])([H])C([H])([H])C([H])([H])C([H])([H])C([H])([H])C([H])([H])[H…	UNII-CPA32HL3CX	5.422	BMDB=BMDB08727,HMDB=HMDB08727	52923691	AHWXJDWBIIDPKS-TZUVPVEASA-N	[H]C(=C([H])C([H])([H])C([H])=C([H])C([H])([H])C([H])=C([H])C([H])([H])C([H])([H])[H])C([H])([H])C([H])=C([H])C([H])([H])C([H])=C([H])C([H])([H])C([H])=C([H])C([H])([H])C([H])([H])C(=O)OC([H])([H])C([H])(OC(=O)C([H])([H])C([H])([H])C([H])([H])C([H])([H])C([H])([H])C([H])([H])C([H])([H])C([H])([H])C([H])([H])C([H])([H])C([H])([H])C([H])([H])C([H])([H])C([H])([H])C([H])([H])C([H])([H])C([H])([H])[H…	356.75311 13;369.97876 13;392.89215 13;395.99274 16;396.9975 15;415.32031 26;438.34338 11;454.12579 13;503.56274 26;522.35162 30;534.45099 37;535.21246 11;549.62811 18;552.52716 22;562.18732 14;563.40558 93;575.28339 18;576.0705 10;577.61554 15;591.37024 33;635.17828 67;647.82904 22;660.5191 20;674.6524 37;676.40771 88;704.47601 13;746.27515 15;773.60028 17;775.28363 207;776.01129 18;788.16766 29…	0.00201368	0.00190164	0.00169374	0.00166722	0.00148588	0.000977595	0.00183859	0.00270838	0	0.00196853	0.00191706	0.00187039	0.00136249	0.00239991	0.00228616	0.00220316	0.00163037	0.00253476	0.000816684	0	0.00250783	0.00253415	0	0.00238316	0.00168813	0.00132097	0.00187539	0.00198545	0.00240971	0.00199347	0.00186566	0.00213739	0.00214645
68_RPNEG	5.39	169.05	[M-H]-	CHEBI:1139	5.4432	ChEBI=CHEBI:1139,PubChem=9776835	9776835	UYUFTVIQTSWWST-QVXLNCAUSA-N	[H]OC(=O)C(O[H])=C([H])C([H])=C([H])C(=O)C([H])([H])C([H])([H])[H]	HMDB32966	5.4177	FooDB=FDB010953,HMDB=HMDB32966	-1	VPKIUOQJQJVLRW-UHFFFAOYNA-N	[H]C([H])([H])C(=O)OC=1C(=O)C([H])(OC=1C([H])([H])[H])C([H])([H])[H]	94.99728 13;110.4425 26;149.05016 11;	0	0	0	0	0	0	0	0	0.000237184	0.000273637	0.000410882	0.000501402	0.00087537	0.000439587	0.000276892	0.000494857	0.000392675	0.000507662	0.000384327	0.000419378	0.000508779	0.000365027	0.000485729	0.000583379	0.000400232	0.000838872	0.000550058	0.000745979	0.000401717	0.000363491	0.000796817	0.00057352	0.000884352
35_HilicNeg	18.83	217.048	[M-H]-	7-Acetoxy-4-methylcoumarin	5.4426	ChEBI=CHEBI:17763,FooDB=FDB010978,HMDB=HMDB32989,UNPD=UNPD12991	366	HXVZGASCDAGAPS-UHFFFAOYSA-N	[H]C=2C([H])=C1C(OC(=O)C([H])=C1C([H])([H])[H])=C([H])C=2(OC(=O)C([H])([H])[H])	CHEBI:17820; CHEBI:58284	4.9877	ChEBI=CHEBI:17820; CHEBI:58284,DrugBank=DB07914	5460220	RDRDHXDYMGUCKE-KXBBGWRGSA-N	[H]OC(=O)C(O[H])=C([H])C([H])=C([H])C(=O)C1=C([H])C([H])=C([H])C([H])=C1([H])	173.15823 152;175.18355 16;179.23608 11;181.21593 955;	0.000268373	0.000181722	0.00168787	0.00149522	0.000994125	0.000274778	0.000332431	0.000182191	0	0.00321445	0.000279487	0.00018134	0.00608366	0.00569327	0.00936165	0.00648073	0.00319367	0.00174832	0.00909891	0	0.00917035	0	0	0.00474468	0.000386838	0.00659016	0.00324919	0.000572714	0.0103077	0.00875542	0.00350207	0.00475195	0.000673299
293_RPPOS	16.41	432.238	[M+H]+	DB08351	5.442	DrugBank=DB08351,PubChem=24963046	24963046	MNEXDVSJIUQQRH-UHFFFAOYSA-N	[H]C1=NC(=NC=2C([H])=C([H])C(=C([H])C1=2)C3=C([H])C(=C([H])C([H])=C3C([H])([H])[H])C(=O)N([H])C4([H])(C([H])([H])C4([H])([H])))N([H])C([H])([H])C([H])([H])N5C([H])([H])C([H])([H])OC([H])([H])C5([H])([H])							199.51933 14;216.00861 19;226.06384 27;231.28197 17;246.21014 38;247.63617 12;273.50961 11;276.37167 11;279.10626 17;295.20935 10;313.19952 13;324.29324 12;347.71881 13;349.49481 14;351.15167 13;356.35522 20;360.39175 42;372.11081 71;373.11838 11;396.09564 63;397.25226 63;408.16058 13;413.44897 114;414.91422 5230;415.60202 23;	0.00309807	0.00332051	0.00340114	0.00395142	0.00346987	0.00357821	0.00327667	0.00264707	0.00384295	0.00316621	0.00329907	0.00362584	0.00328038	0.00124197	0.000588317	0.00201243	0.00454122	0.00209331	0.00113129	0.00477374	0.00122251	0.000173589	0.00226022	0.00370592	0.00344774	0.00365029	0.00237053	0.00166825	0.00125301	0.00107645	0.0023967	0.00203223	0.00158337
485_RPPOS	15.69	818.578	[M+H]+	HMDB09566	5.4373	BMDB=BMDB09566,HMDB=HMDB09566	52924796	CLBSXMZJHNIQGE-ZZGXZYAFSA-N	[H]OP(=O)(OC([H])([H])C([H])([H])N([H])[H])OC([H])([H])C([H])(OC(=O)C([H])([H])C([H])([H])C([H])([H])C([H])=C([H])C([H])([H])C([H])=C([H])C([H])([H])C([H])=C([H])C([H])([H])C([H])=C([H])C([H])([H])C([H])=C([H])C([H])([H])C([H])([H])[H])C([H])([H])OC(=O)C([H])([H])C([H])([H])C([H])([H])C([H])([H])C([H])([H])C([H])([H])C([H])([H])C([H])([H])C([H])([H])C([H])([H])C([H])([H])C([H])=C([H])C([H])([H])C…	HMDB09308	5.4373	BMDB=BMDB09308,HMDB=HMDB09308	53479735	GYOIDNZBAWTCFB-RRMUZNGVSA-N	[H]OP(=O)(OC([H])([H])C([H])([H])N([H])[H])OC([H])([H])C([H])(OC(=O)C([H])([H])C([H])([H])C([H])([H])C([H])([H])C([H])([H])C([H])=C([H])C([H])([H])C([H])=C([H])C([H])([H])C([H])=C([H])C([H])([H])C([H])=C([H])C([H])([H])C([H])=C([H])C([H])([H])C([H])([H])[H])C([H])([H])OC(=O)C([H])([H])C([H])([H])C([H])([H])C([H])([H])C([H])([H])C([H])([H])C([H])([H])C([H])([H])C([H])([H])C([H])=C([H])C([H])([H])C…	800.87793 22;	0.000686443	0	0.000877211	0.000683735	0.000631693	0.000911074	0.00061598	0.000714747	0.00064561	0.001085	0.00137807	0.000805118	0	0.000566603	0.0010321	0.000740432	0.00046681	0.00122527	0.000295302	0	0.000284865	0.000383006	0	0	0.000638708	0.000573261	0.00100343	0.000721124	0.000857148	0.000435227	0.000245019	0.00089366	0.000690306
210_RPPOS	1.77	322.077	[M+H]+	HMDB13220	5.4364	ChEBI=CHEBI:76942; CHEBI:77065,FooDB=FDB029339,HMDB=HMDB13220	72715786	GAQNUGISBQJMKO-YFKPBYRVSA-N	[H]OC(=O)C([H])([H])C([H])([H])C([H])(C(=O)O[H])N([H])C(=O)C(O[H])(C([H])([H])C(=O)O[H])C([H])([H])C(=O)O[H]	CHEBI:16764	5.3326	ChEBI=CHEBI:16764; CHEBI:57886	102276	RGDVNLHBCKWZDA-XLPZGREQSA-N	[H]OC1([H])(C([H])([H])C([H])(OC1([H])(C([H])([H])OP(=O)(O[H])O[H]))N2C(=O)N=C(C(=C2([H]))C([H])([H])[H])N([H])[H])	84.48673 18;124.563 26;134.32455 17;153.4863 14;156.12076 28;165.42564 19;174.0842 13;191.26465 26;193.37296 12;199.3544 26;204.17389 17;231.95386 11;232.7496 11;236.98001 76;239.96933 46;244.63412 46;250.1767 12;258.17102 163;261.97314 43;263.03479 12;284.62585 17;285.40088 169;286.10004 660;291.22729 33;293.87155 12;303.89526 1743;304.68408 59;	9.42012e-05	0.00016737	0	0.000154328	0.000116189	0.000165044	0.000331013	0.000161379	0.000124166	0.000163191	0.000179914	0.000142969	0.000396184	0.000206649	0.000304246	0.000327599	0.000344082	0.000354676	0.000295092	0.000292536	0.000284392	0.000294953	0.000361058	0.000376428	0.000626052	0.000641765	0.00079828	0.000789596	0.000692552	0.000593699	0.000681417	0.000903019	0.000782345
60_HilicNeg	7.47	333.111	[M-H]-	HMDB34937	5.4225	FooDB=FDB013529,HMDB=HMDB34937,KNApSAcK=C00026883,UNPD=UNPD112525	-1	ZVFUTZQNUQUJLW-UHFFFAOYNA-N	[H]OC([H])([H])C3([H])(OC([H])(OC1=C([H])C([H])=C([H])C2=C1C(=C([H])N2([H]))C([H])([H])C#N)C([H])(O[H])C([H])(O[H])C3([H])(O[H]))	SMCC	4.1472	ChEBI=CHEBI:63174	125175	JJAHTWIKCUJRDK-UHFFFAOYSA-N	[H]C1=C([H])C(=O)N(C1(=O))C([H])([H])C3([H])(C([H])([H])C([H])([H])C([H])(C(=O)ON2C(=O)C([H])([H])C([H])([H])C2(=O))C([H])([H])C3([H])([H]))	113.49834 19;125.48307 12;153.47871 16;203.05792 12;217.25537 22;228.24002 13;235.03601 10;240.98557 31;243.21957 16;244.31296 23;245.32672 21;255.29181 18;259.04269 68;273.36435 73;281.83203 24;285.18793 20;286.909 21;288.69562 77;289.29694 151;291.18802 16;297.07227 206;314.19818 24;315.12671 161;	0.0115745	0.0142403	0.0146471	0.0152198	0.0103123	0.0138787	0.0125971	0.0139695	0	0.0149152	0.0159426	0.0126224	0.00584481	0.00234457	0.001106	0.00601091	0.00817934	0.00824055	0.00395292	0	0.00138965	0	0	0.00904907	0.0140099	0.00665956	0.00829735	0.00758263	0.00526827	0.00289184	0.00693669	0.00503315	0.00490496
25_HilicNeg	18.82	181.071	[M-H]-	dulcitol	5.4026	BMDB=BMDB00107; BMDB00247; BMDB00765; BMDB11632,ChEBI=CHEBI:16813; CHEBI:17924; CHEBI:16899; CHEBI:18202; CHEBI:17459; CHEBI:38030,DrugBank=DB00742; DB01638,ECMDB=ECMDB00247; ECMDB00107; ECMDB00765,FooDB=FDB028331; FDB011676; FDB006453,HMDB=HMDB00107; HMDB00247; HMDB00765; HMDB11632,KNApSAcK=C00001173; C00001160; C00001165; C00047000,PlantCyc=MANNITOL; CPD-369; SORBITOL; GALACTITOL,PubChem=11850;…	11850	FBPFZTCFMRRESA-GUCUJZIJSA-N	[H]OC([H])([H])C([H])(O[H])C([H])(O[H])C([H])(O[H])C([H])(O[H])C([H])([H])O[H]	Lathyrine	4.5098	ChEBI=CHEBI:6259,KNApSAcK=C00001376,PlantCyc=LATHYRINE,PubChem=25203094,UNPD=UNPD12197	166766	LIRGSTWGMWYHBN-YFKPBYRVSA-N	[H]OC(=O)C([H])(N([H])[H])C([H])([H])C=1N=C(N=C([H])C=1([H]))N([H])[H]	55.65618 11;58.06969 19;59.54152 719;69.47748 20;71.47749 984;72.83118 65;73.52045 522;75.38215 20;83.41113 99;85.4444 546;87.28336 234;88.59747 276;89.31683 2548;91.57818 21;93.41211 34;97.50041 288;98.63954 21;99.28563 16;101.26736 5791;102.26077 41;103.24641 197;106.09615 15;106.79434 25;107.88986 12;113.24345 2130;113.89247 55;115.27153 594;116.21274 14;117.68074 67;118.55481 382;119.31067 18…	0.0322089	0.016983	0.0185701	0.0201739	0.0209746	0.017839	0.0140613	0.02054	0.000479131	0.020982	0.0184667	0.0141628	0.0720762	0.0893989	0.0875455	0.0522634	0.0323417	0.0322806	0.100979	0.000958971	0.0946875	0.000843504	0.0249916	0.0358296	0.0263282	0.0573802	0.0398677	0.0309778	0.0959824	0.0845953	0.0327042	0.0627404	0.0232207
1302_RPNEG	17.53	538.314	[M-H]-	DB03031	5.3901	DrugBank=DB03031,PubChem=447015	447015	FZFMMSSQQXCBGM-HTNXFJBJSA-N	[H]C5=C([H])C1=C(C([H])=C([H])C([H])=C1S(=O)(=O)N([H])C([H])([H])C([H])([H])C([H])([H])C([H])([H])C([H])([H])C([H])([H])C([H])([H])C([H])([H])N([H])C(=O)C34(C([H])([H])C2([H])(C([H])([H])C([H])(C([H])([H])C([H])(C2([H])([H]))C3([H])([H]))C4([H])([H]))))C(=C5([H]))N(C([H])([H])[H])C([H])([H])[H]							253.27542 194;349.9837 16;363.65656 16;407.23309 31;431.18304 36;478.17853 19044;479.28174 78;481.32562 15;518.10535 12;519.0191 30;	0.00192009	0.00128935	0.001681	0.000537769	0.00144761	0.00180985	0.00107294	0.00230443	0.00180114	0.00230338	0.00205618	0.00126874	0.00159245	0.00214727	0.00230439	0.00298901	0.00241916	0.00264456	0.00233214	0.00253271	0.00295074	0.00231525	0.0026218	0.0025994	0.00245863	0.00391803	0.00377921	0.00393131	0.0040114	0.00457666	0.00871442	0.00493017	0.0109589
430_RPPOS	8.46	619.273	[M+H]+	HMDB60661	5.3869	ChEBI=CHEBI:80551,HMDB=HMDB60661,PubChem=10077584,SMPDB=PW_C040679	10077584	BSVVZICJFYZDJJ-XIFFEERXSA-N	[H]OC(=O)C([H])([H])C([H])([H])C([H])([H])C([H])([H])N([H])C6([H])(C([H])([H])C([H])([H])N(C(=O)OC3=C([H])C([H])=C4N=C2C1=C([H])C5=C(C(=O)N1C([H])([H])C2=C(C4(=C3([H])))C([H])([H])C([H])([H])[H])C([H])([H])OC(=O)C5(O[H])C([H])([H])C([H])([H])[H])C([H])([H])C6([H])([H]))	C00003607	5.168	ChEBI=CHEBI:3201,KNApSAcK=C00003607,UNPD=UNPD83662; UNPD225854	441848	KWKQJZASURFCDP-ZPARAVGQSA-N	[H]OC3([H])(C(=O)C6(C([H])([H])[H])(C([H])(C1=C([H])OC(=O)C([H])=C1([H]))C([H])([H])C([H])([H])C6(O[H])(C4([H])(C([H])([H])C([H])([H])C5(O[H])(C([H])([H])C([H])(OC2([H])(OC([H])(C([H])([H])[H])C([H])([H])C([H])(OC(=O)C([H])([H])[H])C2([H])(O[H])))C([H])([H])C([H])([H])C5(C([H])=O)(C34([H])))))))	259.34595 14;285.20602 10;305.34753 16;321.07663 30210;339.02679 11;346.41638 16;350.909 28;360.84961 11;362.14825 33;380.99402 47;395.24805 45;437.55786 13;485.32227 21;518.21613 15;	0.00200438	0.00207971	0.0024938	0.00248449	0.00213232	0.00159923	0.00186746	0.00235258	0.00199238	0.00233793	0.0025311	0.00250403	0.00217059	0.00131564	0.000377132	0.00253876	0.00300578	0.00275579	0.00195014	0.00293236	0.00116192	0.00172195	0.00248364	0.00326057	0.00289771	0.00229526	0.0027852	0.00299921	0.00273974	0.00199022	0.00312189	0.00300956	0.00277326
307_HilicPos	6.1	772.587	[M+H]+	PE(20:0/18:2)	5.3733	BMDB=BMDB09225,HMDB=HMDB09225,PubChem=9546825	9546825	CLPMAPXZURYSNH-CNBLIUODSA-N	[H]OP(=O)(OC([H])([H])C([H])([H])N([H])[H])OC([H])([H])C([H])(OC(=O)C([H])([H])C([H])([H])C([H])([H])C([H])([H])C([H])([H])C([H])([H])C([H])([H])C([H])=C([H])C([H])([H])C([H])=C([H])C([H])([H])C([H])([H])C([H])([H])C([H])([H])C([H])([H])[H])C([H])([H])OC(=O)C([H])([H])C([H])([H])C([H])([H])C([H])([H])C([H])([H])C([H])([H])C([H])([H])C([H])([H])C([H])([H])C([H])([H])C([H])([H])C([H])([H])C([H])([H…	PE(18:2(9Z,12Z)/20:0)	5.3354	BMDB=BMDB09097,HMDB=HMDB09097	52924370	DPTUTWFSXXDMEO-CNBLIUODSA-N	[H]OP(=O)(OC([H])([H])C([H])([H])N([H])[H])OC([H])([H])C([H])(OC(=O)C([H])([H])C([H])([H])C([H])([H])C([H])([H])C([H])([H])C([H])([H])C([H])([H])C([H])([H])C([H])([H])C([H])([H])C([H])([H])C([H])([H])C([H])([H])C([H])([H])C([H])([H])C([H])([H])C([H])([H])C([H])([H])C([H])([H])[H])C([H])([H])OC(=O)C([H])([H])C([H])([H])C([H])([H])C([H])([H])C([H])([H])C([H])([H])C([H])([H])C([H])=C([H])C([H])([H])…	387.58313 17;416.41241 23;565.74249 14;589.14655 14;631.6604 38;698.66425 15;712.40381 21;713.18134 182;713.8653 18;716.93195 20;	0.00121919	0.00121907	0.00123799	0.00110651	0.000922939	0.00081478	0.00112059	0.00145353	0	0.0012301	0.00124796	0.00119234	0.00122231	0.00139725	0.00174021	0.00142849	0.00123904	0.00165353	0.000858593	0	0.00139774	0.00139473	0	0.0014243	0.00196327	0.00154346	0.00170248	0.0019184	0.00210536	0.00169535	0.00173597	0.00175047	0.0018012
442_RPPOS	21.91	650.44	[M+H]+	CHEBI:61042	5.3541	ChEBI=CHEBI:61042	46907874	PPTNNIINSOQWCE-WJOKGBTCSA-N	[H]C(=O)C([H])([H])C([H])([H])C([H])([H])C([H])([H])C([H])([H])C([H])([H])C([H])([H])C(=O)OC([H])(C([H])([H])OC(=O)C([H])([H])C([H])([H])C([H])([H])C([H])([H])C([H])([H])C([H])([H])C([H])([H])C([H])([H])C([H])([H])C([H])([H])C([H])([H])C([H])([H])C([H])([H])C([H])([H])C([H])([H])[H])C([H])([H])OP(=O)([O-])OC([H])([H])C([H])([H])[N+](C([H])([H])[H])(C([H])([H])[H])C([H])([H])[H]							184.2312 4749;185.0471 14;248.1328 14;269.26526 17;281.18417 20;318.45593 43;335.1698 13;337.41229 24;343.34479 10;362.52661 23;385.32617 28;394.17627 129;403.06653 14;405.17084 15;406.17615 15;412.34717 27;418.24237 14;418.96655 13;420.24152 14;427.17896 12;441.79254 22;454.2049 32;457.38434 11;459.23871 20;460.04651 18;463.24316 23;465.25647 46;466.73615 83;467.52618 59;474.69635 23;478.25824 1…	0.000656593	0.000567144	0.000675906	0.00106931	0.000664955	0.000355821	3.17497e-05	0.000871872	0.00071072	0.000736292	0.00053936	0.00085987	7.70463e-05	0.000154147	0.000130133	0.000184088	0.000203877	5.46498e-06	0.000205847	0.000757527	0	0.000162272	4.39297e-05	0.000185097	0.000992536	0.00115477	0.000980186	0.00086252	0.000915729	0.000744161	0.00100054	0.00118799	0.00130018
514_RPPOS	20.29	908.653	[M+H]+	DB04780	5.3193	ChEBI=CHEBI:75964; CHEBI:76069; CHEBI:83902,DrugBank=DB04780,UNPD=UNPD107975	71768138	QTTLKKFUOJQIRB-JOLIRYOJSA-N	[H]OC([H])([H])C1([H])(OC([H])(OC([H])([H])C([H])(N([H])C(=O)C([H])(O[H])C([H])([H])C([H])([H])C([H])([H])C([H])([H])C([H])([H])C([H])([H])C([H])([H])C([H])([H])C([H])([H])C([H])([H])C([H])([H])C([H])([H])C([H])([H])C([H])([H])C([H])([H])C([H])([H])C([H])([H])C([H])([H])C([H])([H])C([H])([H])C([H])([H])C([H])([H])[H])C([H])(O[H])C([H])=C([H])C([H])([H])C([H])([H])C([H])([H])C([H])([H])C([H])([H])…							264.71075 11;279.21497 13;309.0246 114;311.18604 23;327.40186 17;329.62177 53;352.83463 161;355.17505 17;371.15945 24;388.40823 22;396.32086 48;397.05759 54;415.06561 67;441.13824 69;443.12366 30;459.40704 10;482.56775 17;485.07501 50;503.33636 56;520.1933 15;523.22156 33;529.06671 12;547.34576 60;563.08838 11;572.51044 18;573.11432 14;579.03021 20;591.08649 61;611.19257 20;635.18231 85;679.33496…	0.000334367	0.000333455	0.000342228	0.000516394	0.000379841	0.000372761	0.000396661	0.000356879	0.000507017	0.000357748	0.000351236	0.000294109	0.000656598	0.000618674	0.000215872	0.000381209	0.000689261	0.000232446	0.000715033	0.000395968	0.000434627	0.000515578	0.00044086	0.000574423	0.000372634	0.000553317	0.000280636	0.000163342	0.000256037	0.000257552	0.000250897	0.000205856	0.000306829
392_RPPOS	19.39	529.35	[M+H]+	HMDB35335	5.3151	FooDB=FDB014007,HMDB=HMDB35335,UNPD=UNPD62985	-1	VMVPNJFQQSEVKB-GIJQJNRQNA-N	[H]OC(=O)C(=C([H])C([H])([H])C([H])(O[H])C([H])(C([H])([H])[H])C1([H])(C([H])([H])C([H])(O[H])C2(C3=C([H])C([H])([H])C4([H])(C(C3(=C([H])C([H])([H])C12(C([H])([H])[H])))(C([H])([H])[H])C([H])([H])C([H])([H])C([H])(OC(=O)C([H])([H])[H])C4(C([H])([H])[H])(C([H])([H])[H])))(C([H])([H])[H])))C([H])([H])[H]	HMDB33079	5.2842	FooDB=FDB011074,HMDB=HMDB33079,KNApSAcK=C00023850,UNPD=UNPD31223; UNPD229578	-1	KUXMNDKEYFTKBS-ODLFYWEKNA-N	[H]OC(=O)C(=C([H])C([H])([H])C([H])([H])C([H])(C([H])([H])[H])C1([H])(C([H])([H])C([H])(OC(=O)C([H])([H])[H])C2(C3=C(C([H])([H])C([H])([H])C12(C([H])([H])[H]))C4(C([H])([H])[H])(C([H])([H])C([H])([H])C(=O)C(C([H])([H])[H])(C([H])([H])[H])C4([H])(C([H])([H])C3([H])(O[H]))))(C([H])([H])[H])))C([H])([H])[H]	230.18105 11;241.85065 21;246.24696 30;265.96686 18;281.04401 48;288.66467 11;316.15314 11;333.20758 10;340.42621 20;342.23846 16;343.38416 10;370.15149 37;370.90399 27;372.15363 36;386.99286 15;391.17834 23;397.14587 15;447.97968 31;450.11859 51;453.37524 21;465.22839 22;469.26385 51;470.297 464;471.37439 18;475.10291 38;492.45477 64;493.19098 19;511.18823 10;512.02826 44;	0.000508019	0.0001537	0.000454306	0.000238126	0.000317989	0.000235793	0.00038665	0.000442275	0.000701562	0.000535309	0.000331039	0.000253936	0.000319714	0.00102548	0.000625344	0.000833813	0.000933686	0.000618784	0.000280318	0.0002484	0.000547239	0.00057095	0.000368919	0.000576387	0.000438336	0.000764141	0.000656636	0.000508167	0.000663969	0.000733017	0.00104952	0.000992935	0.000622123
566_RPNEG	9.11	341.302	[M-H]-	2-Hydroxypropyl stearate	5.3139	FooDB=FDB000971,HMDB=HMDB29764	-1	FKOKUHFZNIUSLW-UHFFFAOYNA-N	[H]OC([H])(C([H])([H])[H])C([H])([H])OC(=O)C([H])([H])C([H])([H])C([H])([H])C([H])([H])C([H])([H])C([H])([H])C([H])([H])C([H])([H])C([H])([H])C([H])([H])C([H])([H])C([H])([H])C([H])([H])C([H])([H])C([H])([H])C([H])([H])C([H])([H])[H]	2-Hydroxyhenicosanoic acid	5.3057	ChEBI=CHEBI:84857,UNPD=UNPD151941	5312779	DHCJPXKWDPRJAX-UHFFFAOYNA-N	[H]OC(=O)C([H])(O[H])C([H])([H])C([H])([H])C([H])([H])C([H])([H])C([H])([H])C([H])([H])C([H])([H])C([H])([H])C([H])([H])C([H])([H])C([H])([H])C([H])([H])C([H])([H])C([H])([H])C([H])([H])C([H])([H])C([H])([H])C([H])([H])C([H])([H])[H]	113.22633 11;201.42679 27;208.26645 31;240.99384 15;303.04221 20;304.75507 36;321.06061 17;	0.00356463	0.00367225	0.00401395	0.00372483	0.00396595	0.00485411	0.00115239	0.00491555	0.00121359	0	0	0	0.000754873	6.66193e-05	0	0	0.000291667	0.000256762	0.000470474	0.000462088	0.000251666	0.000664125	0.000793696	0.0014653	0.00139496	0.00136711	0.000900554	0.000756262	0.000623348	0.000361084	0.000989516	0.000735845	0.000396956
448_RPPOS	20.63	666.434	[M+H]+	CHEBI:61817	5.3138	ChEBI=CHEBI:61817; CHEBI:78207	46907870	GHQQYDSARXURNG-SSEXGKCCSA-N	[H]OC(=O)C([H])([H])C([H])([H])C([H])([H])C([H])([H])C([H])([H])C([H])([H])C([H])([H])C(=O)OC([H])(C([H])([H])OC(=O)C([H])([H])C([H])([H])C([H])([H])C([H])([H])C([H])([H])C([H])([H])C([H])([H])C([H])([H])C([H])([H])C([H])([H])C([H])([H])C([H])([H])C([H])([H])C([H])([H])C([H])([H])[H])C([H])([H])OP(=O)([O-])OC([H])([H])C([H])([H])[N+](C([H])([H])[H])(C([H])([H])[H])C([H])([H])[H]							213.30647 14;277.28885 45;296.56183 16;312.88733 24;315.59229 19;321.24506 12;324.9967 15;331.31107 27;334.78497 12;335.46808 24;371.13599 23;410.32062 141;411.39941 26;420.36243 19;422.74872 11;428.1604 25;431.2113 27;441.40533 72;443.35992 22;446.25415 22;461.53809 19;463.29907 11;465.26794 19;468.12317 29;478.26788 125;481.24432 15;483.23798 19;495.27173 25;496.26044 77;499.3653 21;504.31958 1…	0.000472414	0.000581543	0.00078769	0.00126192	0.000708684	0.000439851	0	0.000953505	0.000754412	0.000868232	0.000567992	0.000724025	0.000295402	5.66408e-06	0	0	0	0	7.10174e-05	0.000939979	0.00018171	0.000150632	0	0.000105082	0.000863812	0.00118978	0.00114889	0.000949059	0.00106187	0.000836434	0.00138801	0.00135838	0.00143479
708_RPNEG	12.74	351.202	[M-H]-	HMDB15049	5.3068	ChEBI=CHEBI:61203; CHEBI:61207; CHEBI:61208,DrugBank=DB00913,HMDB=HMDB15049,PubChem=8944,SMPDB=PW_C009361,T3DB=T3D2929	8944	LKYQLAWMNBFNJT-UHFFFAOYSA-N	[H]C1=C([H])C([H])=C(C([H])=C1([H]))C3(C(=O)OC([H])([H])C([H])([H])[H])(C([H])([H])C([H])([H])N(C([H])([H])C([H])([H])C2=C([H])C([H])=C(C([H])=C2([H]))N([H])[H])C([H])([H])C3([H])([H]))	HMDB31979	5.078	FooDB=FDB008672,HMDB=HMDB31979,KNApSAcK=C00023149,UNPD=UNPD159508	11046403	JMFNGSBVJBPGQR-IWRWKHRWSA-N	[H]C(=O)C(=C([H])C([H])=C([H])C(=C([H])C([H])=C([H])C([H])=C(C([H])=C([H])C([H])=C(C([H])=C([H])C(=O)OC([H])([H])[H])C([H])([H])[H])C([H])([H])[H])C([H])([H])[H])C([H])([H])[H]	101.30304 124;113.10649 14;127.4705 19;128.21768 12;131.56219 30;145.17696 14;161.05893 12;163.12497 1379;227.1842 13;237.2171 16;253.63644 18;262.63794 19;267.01172 23;282.75446 30;331.04886 48;	0	0	0	0	0	0	0	0	0	0	0	0	0	0	0	0	0	0	0	0	0	0	0	0	0	0	0	0	0	0	0	0	0
456_RPNEG	9.24	333.11	[M-H]-	HMDB34937	5.3012	FooDB=FDB013529,HMDB=HMDB34937,KNApSAcK=C00026883,UNPD=UNPD112525	-1	ZVFUTZQNUQUJLW-UHFFFAOYNA-N	[H]OC([H])([H])C3([H])(OC([H])(OC1=C([H])C([H])=C([H])C2=C1C(=C([H])N2([H]))C([H])([H])C#N)C([H])(O[H])C([H])(O[H])C3([H])(O[H]))	CHEBI:63174	4.1708	ChEBI=CHEBI:63174	125175	JJAHTWIKCUJRDK-UHFFFAOYSA-N	[H]C1=C([H])C(=O)N(C1(=O))C([H])([H])C3([H])(C([H])([H])C([H])([H])C([H])(C(=O)ON2C(=O)C([H])([H])C([H])([H])C2(=O))C([H])([H])C3([H])([H]))	220.79468 14;229.04172 16;297.19855 213;312.88055 33;315.13147 29;	0.0139721	0.0139581	0.014485	0.0158463	0.0154712	0.0190944	0.00408331	0.018723	0.0140945	0.0183469	0.0168286	0.0124906	0.000894827	0.00119377	0.00150328	0.00971935	0.0107669	0.0091436	0.00966036	0.00521609	0.00102508	0.00496284	0.00554722	0.0106537	0.0114703	0.00898514	0.00689702	0.00725558	0.00479778	0.00197626	0.0071019	0.0041623	0.00356237
977_RPNEG	15.6	426.033	[M-H]-	DB04542	5.2989	DrugBank=DB04542,PubChem=46937003	46937003	QOYVAFWJURKBJG-GJMOJQLCSA-N	[H]OP(=O)(O[H])OP(=O)(O[H])OC([H])([H])C2([H])(OC([H])(N1C([H])=C(C(=O)N([H])C1(=O))C([H])([H])[H])C([H])([H])C2([H])(N=[N+]=[N-]))	HMDB00960	4.7951	BMDB=BMDB00960,ChEBI=CHEBI:28862; CHEBI:58595,DrugBank=DB03491,ECMDB=ECMDB00960,FooDB=FDB022338,HMDB=HMDB00960,KNApSAcK=C00019355,PlantCyc=DGDP,PubChem=439220; 46936697; 25245673; 644,SMPDB=PW_C000767,YMDB=YMDB00898	439220	CIKGWCTVFSRMJU-KVQBGUIXSA-N	[H]OC1([H])(C([H])([H])C([H])(OC1([H])(C([H])([H])OP(=O)(O[H])OP(=O)(O[H])O[H]))N3C([H])=NC=2C(=O)N([H])C(=NC=23)N([H])[H])	306.14706 18;368.99765 28;408.44058 20;	0	0	0	0	0	0	0.0091453	0	0.00252321	0.00114168	0.00128874	0.00104032	0.00318186	0.00523927	0.0050494	0.00260136	0.00197239	0.00258194	0.0012064	0.00426919	0.00656352	0.00503764	0.00431237	0.00133594	0.00111658	0.00295785	0.00406517	0.00346448	0.00455533	0.00823161	0.00208765	0.0029986	0.00131591
331_RPPOS	20.77	468.39	[M+H]+	C00001941	5.2949	ChEBI=CHEBI:6556,KNApSAcK=C00001941; C00028492,UNPD=UNPD181854; UNPD208837; UNPD20994; UNPD68278	156059	ZGALAVFQYJOLRQ-JFAPVTKNSA-N	[H]C([H])([H])C(=O)N1C([H])([H])C([H])([H])C([H])([H])C6([H])(C1([H])C([H])([H])C([H])(C([H])([H])[H])C([H])([H])C6([H])(C([H])([H])C5([H])(N=C4C([H])([H])C3([H])(C([H])([H])C([H])(C([H])([H])[H])C([H])([H])C2([H])(N(C([H])([H])[H])C([H])([H])C([H])(C([H])([H])C23([H]))C4([H])C([H])([H])C5([H])([H]))))))							136.5475 11;177.24141 65;184.18217 20;194.47079 14;203.24179 31;221.06113 30;235.05862 10;239.33159 26;253.0177 15;256.30975 22;264.35248 15;265.21777 29;283.20602 2211;293.63623 20;297.15302 22;311.31381 17;316.20499 36;338.18915 11;343.31732 11;350.22009 11;350.96002 38;368.06158 13;370.52698 27;385.65518 27;392.53293 10;405.40048 33;430.32547 35;443.20789 32;444.35291 37;445.60812 16;450.17365…	0.000325137	0.00048827	0.000454707	0.000555232	0.00048134	0.000583355	0.000617331	0.000594756	0.000480067	0.000575487	0.000571978	0.000534125	0.000524574	0.000649701	0.000563172	0.000531266	0.000434025	0.000463117	0.000612855	0.000492215	0.00056438	0.000595182	0.000542742	0.000684206	0.000805076	0.000534923	0.000508031	0.000548609	0.000614832	0.000511812	0.000485822	0.000531747	0.000570224
401_RPPOS	17.58	544.34	[M+H]+	HMDB10395	5.2754	BMDB=BMDB10395,ChEBI=CHEBI:74344,FooDB=FDB027546,HMDB=HMDB10395,YMDB=YMDB02213	24779476	LAXQYRRMGGEGOH-JXRLJXCWSA-N	[H]OC([H])(C([H])([H])OC(=O)C([H])([H])C([H])([H])C([H])([H])C([H])=C([H])C([H])([H])C([H])=C([H])C([H])([H])C([H])=C([H])C([H])([H])C([H])=C([H])C([H])([H])C([H])([H])C([H])([H])C([H])([H])C([H])([H])[H])C([H])([H])OP(=O)([O-])OC([H])([H])C([H])([H])[N+](C([H])([H])[H])(C([H])([H])[H])C([H])([H])[H]	HMDB10396	5.2397	BMDB=BMDB10396,FooDB=FDB027547,HMDB=HMDB10396,YMDB=YMDB02214	53480469	GOMVPVRDBLLHQC-VEJNOCSESA-N	[H]OC([H])(C([H])([H])OC(=O)C([H])([H])C([H])([H])C([H])([H])C([H])([H])C([H])([H])C([H])([H])C([H])=C([H])C([H])([H])C([H])=C([H])C([H])([H])C([H])=C([H])C([H])([H])C([H])=C([H])C([H])([H])C([H])([H])[H])C([H])([H])OP(=O)([O-])OC([H])([H])C([H])([H])[N+](C([H])([H])[H])(C([H])([H])[H])C([H])([H])[H]	166.24054 20;184.18152 6347;184.95468 36;208.32231 15;258.21426 36;261.36368 12;269.9823 12;329.1308 30;345.44348 11;366.76416 11;415.44519 13;418.87189 16;433.88812 19;455.52435 27;464.37183 22;469.24866 23;476.76508 21;485.17297 44;507.78839 64;509.3327 53;520.69489 13;526.26056 4981;527.14905 89;544.20526 14;	0.000332044	0.00020013	0.000362933	0.000229724	0.000262593	0.000188134	0.000282096	0.000276807	0.000379104	0.000318479	0.000293408	0.000231998	0.000330848	0.000416238	0.000314963	0.000387501	0.000368608	0.000256322	0.000159544	0.000390802	0.000378365	0.000458994	0.000316095	0.000401558	0.000136131	0.000102993	0.00015065	9.86196e-05	4.64443e-05	3.13763e-05	0.000151712	0.000215995	0.000169616
398_RPPOS	16.79	542.324	[M+H]+	DB04653	5.2561	DrugBank=DB04653,PubChem=5494413	5494413	FVHOZBBGUIEWAG-PFWSVGDOSA-N	[H]OC1=C([H])C([H])=C(C([H])=C1([H]))C([H])([H])C([H])(C(=O)C([H])([H])[H])N([H])C(=O)C([H])(N([H])C([H])(O[H])C([H])(N([H])C(=O)OC([H])([H])C2=C([H])C([H])=C([H])C([H])=C2([H]))C([H])([H])C([H])(C([H])([H])[H])C([H])([H])[H])C([H])([H])C([H])(C([H])([H])[H])C([H])([H])[H]	HMDB10397	5.0677	BMDB=BMDB10397,FooDB=FDB027548,HMDB=HMDB10397,UNPD=UNPD182615	11757087	PDIGSOAOQOXRDU-WJPZTBRDSA-N	[H]OC([H])(C([H])([H])OC(=O)C([H])([H])C([H])([H])C([H])([H])C([H])=C([H])C([H])([H])C([H])=C([H])C([H])([H])C([H])=C([H])C([H])([H])C([H])=C([H])C([H])([H])C([H])=C([H])C([H])([H])C([H])([H])[H])C([H])([H])OP(=O)([O-])OC([H])([H])C([H])([H])[N+](C([H])([H])[H])(C([H])([H])[H])C([H])([H])[H]	184.23306 1439;239.35178 20;243.16708 12;256.75256 21;268.26221 27;327.30554 52;331.05463 31;359.4762 13;368.98975 10;387.29181 13;390.64355 19;420.55011 17;423.8736 14;426.65637 61;430.47821 14;433.18384 34;436.61945 20;447.30981 20;451.76294 12;454.86938 15;465.36993 24;480.25293 11;488.05707 11;502.23889 11;505.92664 55;506.83435 99;524.14972 5706;525.03241 83;	0.000199097	0.000195849	0.000222641	0	0.000125649	1.06561e-05	0.000264078	0.000273604	0.00038994	0.000243896	0.000249063	0.000155445	0.000255423	0.000364692	0.000254552	0.000370507	0.000386684	0.000290445	0.000237929	0.000331855	0.000473889	0.000650788	0.000438188	0.000367079	0	0.000144253	1.50814e-05	2.43064e-05	6.38659e-05	0.000130981	0.000209369	0.000169735	3.28761e-06
26_RPNEG	2.5	129.019	[M-H]-	CHEBI:63828	5.2536	ChEBI=CHEBI:63828,PubChem=55300606	55300606	XDDZSHOHIYJKPM-UHFFFAOYSA-N	[H]C1=C([H])N(C(N1([H]))=S=O)C([H])([H])[H]	HMDB59743	5.1939	ChEBI=CHEBI:73673; CHEBI:73677; CHEBI:74524,HMDB=HMDB59743	7157124	QVADRSWDTZDDGR-VKHMYHEASA-N	[H]OC(=O)C1([H])(OC(=O)C([H])([H])C1([H])([H]))	59.55874 12;88.1428 24;101.16039 14;102.12567 10;	0.000329848	0.000395524	0.000325649	0.000251209	0.000366961	0.000532576	0.000118501	0.000539742	0.000352719	0.000237847	0.000418417	0.000449086	0.00265243	0.00292756	0.000318536	0.00266997	0.0037529	0.00318991	0.000433086	0.000471539	0.000546588	0.000434942	0.000562664	0.000706461	0.00043316	0.00110298	0.00106515	0.0017627	0.00154421	0.000482726	0.000915166	0.000330511	0.000695567
907_RPNEG	12.27	378.166	[M-H]-	CHEBI:31506	5.2118	ChEBI=CHEBI:31506,UNPD=UNPD82824	443775	NNCITNDNYQWFCU-ZNLKAECVSA-N	[H]OC1=C(C([H])=C([H])C2=C([H])C(=C([H])C(OC([H])([H])[H])=C12)C([H])([H])[H])C=3C([H])=C([H])C4=C(C=3(O[H]))C([H])(N([H])C([H])(C([H])([H])[H])C4([H])(O[H]))C([H])([H])[H]	C00025315	5.1461	ChEBI=CHEBI:31754,KNApSAcK=C00025315,UNPD=UNPD6333	392421	JOXWHCNNDTWJPX-CHWSQXEVSA-N	[H]OC1=C([H])C([H])=C(C=2C([H])=C(C([H])=C(OC([H])([H])[H])C1=2)C([H])([H])[H])C=3C(O[H])=C([H])C(O[H])=C4C=3C([H])([H])C([H])(N([H])C4([H])C([H])([H])[H])C([H])([H])[H]	128.14322 407;128.82191 10;144.10944 24;166.09221 39;179.24164 40;190.12561 76;191.27243 178;193.52867 14;202.37262 11;203.99036 23;235.25223 144;236.22092 14;237.17053 26;246.37509 33;248.21722 700;249.14209 22;264.15332 240;278.76923 22;292.09222 511;293.19855 15;293.854 16;342.81842 19;346.33945 14;350.21912 280;	0	0	0	0	0	0	0	0	0	0	0	0	0	0	0	0	0	0	0	0	0	0	0	0	0	0	0	0	0	0	0	0	0
161_RPPOS	1.25	280.092	[M+H]+	HMDB38955	5.2089	FooDB=FDB018438,HMDB=HMDB38955,UNPD=UNPD69854	6440605	NODJLUIXDICTEH-KTKRTIGZSA-N	[H]C1=C([H])C([H])=C2C(=O)OC(=NC2(=C1([H])))C([H])=C([H])C=3C([H])=C([H])C([H])=C(OC([H])([H])[H])C=3([H])	CHEBI:70181	5.2014	ChEBI=CHEBI:70181,UNPD=UNPD73337	50994062	XWKNZWMZVKJEKJ-VGOFMYFVSA-N	[H]OC(=O)C1=C([H])C([H])=C([H])C([H])=C1N([H])N=C(C(=O)N([H])C([H])([H])C(=O)O[H])C([H])([H])[H]	86.45781 116;104.43989 5181;105.08896 118;154.09698 53;164.10666 1173;204.10349 26;211.92783 33;219.82419 32;221.12048 15144;222.40927 72;243.35318 18;244.00818 84;261.30557 12;262.32037 50;	0.000409171	0.00026953	0.000462552	0.000230696	0.000361509	0.000435596	0.000534473	0.000296822	0.000350832	0.000234033	0	0.000354471	0.000946236	0.000579907	0.000587742	0.000864981	0.000817054	0	0.000517963	0.000373469	0	0.000557516	0.000622865	0.000777195	0	0	0	0.000189526	0	0	0.00017267	0.00022951	0.000201311
188_RPPOS	5.24	300.202	[M+H]+	CHEBI:4901	5.1875	ChEBI=CHEBI:4901	443409	SEJUQQOPVAUETF-SCTOPSOGSA-N	[H]OC=1C([H])=C([H])C=2C(=O)C3([H])(N(C([H])([H])C([H])([H])C(C=2(C=1([H])))(C([H])([H])C([H])([H])[H])C3([H])(C([H])([H])[H]))C([H])([H])C4([H])(C([H])([H])C4([H])([H])))							90.51587 18;103.24828 317;105.29728 13;126.43074 11;130.80614 13;162.47586 17;173.92949 23;188.49437 27;190.37636 69;192.43965 168;201.22192 21;222.88928 55;227.59982 18;239.16629 44;262.32788 27;264.85638 29;265.6275 15;270.18628 41;276.63174 22;283.09869 9923;299.68903 76;	0.000480808	0.000462634	0.000333033	0.000355953	0.000380685	0.000270998	5.32973e-05	0.00039331	0.00046159	0.000266054	0.000406485	0.000589254	0.000452434	0.000344598	6.29641e-05	0.000522965	0.000382961	4.55597e-05	0.00036828	0.000394438	7.65026e-05	0.00016398	0.000204261	0.000194606	0.000264441	0.000226817	3.20248e-05	2.41139e-05	6.94433e-05	2.23788e-05	0.000176336	0.000249229	4.89738e-05
133_RPPOS	14.72	230.248	[M+H]+	CHEBI:73882	5.1874	ChEBI=CHEBI:73882,UNPD=UNPD124814; UNPD128312	14756407	WMUMHAZHWIUBPN-UONOGXRCSA-N	[H]OC([H])(C([H])([H])C([H])([H])C([H])([H])C([H])([H])C([H])([H])C([H])([H])C([H])([H])C([H])([H])C([H])([H])C([H])([H])C([H])([H])[H])C([H])(N([H])[H])C([H])([H])[H]	dodecyldimethylamine oxide	5.1323	DrugBank=DB04147,PubChem=15433,STOFF=SI00000170	15433	SYELZBGXAIXKHU-UHFFFAOYSA-N	[H]C([H])([H])C([H])([H])C([H])([H])C([H])([H])C([H])([H])C([H])([H])C([H])([H])C([H])([H])C([H])([H])C([H])([H])C([H])([H])C([H])([H])[N+]([O-])(C([H])([H])[H])C([H])([H])[H]	85.50069 17;113.19588 16;126.18959 17;131.17978 10;133.06914 12;148.49397 21;159.3842 14;170.3131 11;172.27779 10;174.29451 40;202.72197 11;207.08815 19;212.18187 93;213.19038 45;	0.000237846	0.000190759	0.000233724	0.000301526	0.000200492	3.86033e-05	0.000401131	0.000254875	0.000238835	0.000235289	0.00019197	0.000188831	0.000817891	0.000556919	0.000365549	0.000699692	0.000818666	0.000425255	0.000747752	0.000203445	0.000456771	0.000502313	0.000595068	0.00051618	1.74169e-05	0.000350292	0.000264779	0.000190188	0.000187182	0.000162125	0.000245608	0.00016962	0.000228997
291_RPPOS	14.93	432.238	[M+H]+	DB08351	5.1867	DrugBank=DB08351,PubChem=24963046	24963046	MNEXDVSJIUQQRH-UHFFFAOYSA-N	[H]C1=NC(=NC=2C([H])=C([H])C(=C([H])C1=2)C3=C([H])C(=C([H])C([H])=C3C([H])([H])[H])C(=O)N([H])C4([H])(C([H])([H])C4([H])([H])))N([H])C([H])([H])C([H])([H])N5C([H])([H])C([H])([H])OC([H])([H])C5([H])([H])							134.51743 63;151.38705 28;227.5284 28;249.53207 35;279.31464 22;281.13293 42;294.79715 211;323.01682 24;344.5983 48;369.36826 27;374.4263 106;397.1705 311;412.68643 140;414.51108 9076;415.14401 18986;	0.0124138	0.011796	0.010684	0.0128245	0.0119826	0.0121947	0.00754059	0.00866652	0.0121781	0.0119858	0.0136046	0.0121689	0.00740667	0.00303573	0.00153266	0.0056715	0.0113624	0.00705326	0.00331282	0.0151874	0.0040373	0.00248057	0.00517077	0.009379	0.0107863	0.00819617	0.00845346	0.0111233	0.0041533	0.00723793	0.0125251	0.0153381	0.00747624
159_RPPOS	8.36	274.165	[M+H]+	HMDB61158	5.1744	HMDB=HMDB61158	-1	CQIAKQMSTPQBAU-UHFFFAOYNA-N	[H]C=1C([H])=C2C(=C([H])C=1C(=O)N([H])[H])C3([H])(C([H])([H])C([H])(N([H])C(=O)C([H])([H])[H])C([H])([H])C([H])([H])C3([H])(N2([H])))	DB07461	5.1657	DrugBank=DB07461,PubChem=5287789	5287789	JVDDTUQPPBUQDD-DZGCQCFKSA-N	[H]C1=C([H])C([H])=C(C([H])=C1([H]))C([H])([H])C3(C(=O)N2N(C([H])([H])C([H])([H])C2([H])(C([H])=O))C([H])([H])C3([H])([H]))(N([H])[H])	95.61219 16;97.60698 40;100.59341 28;101.44611 23;109.20927 117;111.27376 92;123.10039 22;124.383 31;140.38922 20;147.30267 18;152.93271 19;155.29387 15;158.92911 60;165.26154 19;169.13116 439;182.99695 64;184.12827 19;190.03214 11;193.07857 441;194.94516 39;196.34271 95;197.68658 32;198.31241 35;203.37183 12;209.62067 16;211.03534 640;211.67523 11;215.14627 79;216.26425 20;221.13977 185;235.5813…	0.000568381	0.000625782	0.000624552	0.00109365	0.000676665	0.000470962	0.00102541	0.000709629	0.000913615	0.000579568	0.000172277	0.000567732	0.00262478	0.00171055	0.000995363	0.00208291	0.00234383	0.00135791	0.00213486	0.000703394	0.00123497	0.00135633	0.0015253	0.00157963	0.000486049	0.00117898	0.000852397	0.000778036	0.000719307	0.00066584	0.00116174	0.000815967	0.000818914
182_RPPOS	16.26	298.31	[M+H]+	Kalinin	5.1642	HMDB=HMDB31810,T3DB=T3D4939,STOFF=SI00004291	-1	YTOPFCCWCSOHFV-UHFFFAOYNA-N	[H]C([H])([H])C([H])([H])C([H])([H])C([H])([H])C([H])([H])C([H])([H])C([H])([H])C([H])([H])C([H])([H])C([H])([H])C([H])([H])C([H])([H])C([H])([H])N1C([H])([H])C([H])(OC([H])(C([H])([H])[H])C1([H])([H]))C([H])([H])[H]							91.59876 55;93.29792 57;95.31323 1552;97.41023 16;99.38021 41;101.30924 13;107.11064 17;109.23932 470;109.84247 13;116.49461 29;123.22412 25;124.77901 41;146.14825 15;151.26025 147;166.2886 12;168.53271 141;169.31219 390;181.09019 36;203.7489 25;208.13681 17;215.74045 12;227.0141 27;239.32016 2022;259.45361 20;263.02649 100;274.33652 49;276.78973 48;280.02414 32;281.12653 180;	0.000786758	0.000768149	0.000758209	0.000193389	0.000601683	0.000501911	0	5.01917e-05	2.71381e-05	0.000756168	0.000593634	0.000619091	0	0	0	0	0	0	0	0.000877674	0	0	0	0	0.000376731	0	0.000736603	0.000560776	0.000619593	0.00058268	0.000880108	0.000682858	0.000877281
80_RPPOS	1.37	174.149	[M+H]+	Nonanoic acid, 9-amino-	5.1611	ChEBI=CHEBI:73740	136877	VWPQCOZMXULHDM-UHFFFAOYSA-N	[H]OC(=O)C([H])([H])C([H])([H])C([H])([H])C([H])([H])C([H])([H])C([H])([H])C([H])([H])C([H])([H])N([H])[H]							55.54587 63;56.56263 16;58.49767 46;59.52049 95;60.4161 21;61.15646 13;67.89504 29;69.04545 30;69.71674 36;70.67337 22;74.51193 14;79.60645 67;81.54205 119;82.44409 19;83.58109 43;86.30894 116;86.98483 19;93.94391 33;96.3922 126;97.47835 139;98.42938 1272;99.39406 30;104.65991 32;109.34277 33;110.45511 42;112.30377 79;114.31931 370;116.34367 1047;138.39763 506;141.29149 23;145.22151 10;146.30165 …	0.000177083	0.000266227	0.000105698	0.000176669	0.000177663	0.000162638	0.000223299	0.000176751	0.000148867	0.000198636	0.000218988	1.31246e-05	0.000535594	0.000462012	0.000338279	0.000269088	0.000333126	9.25071e-05	0.000503233	6.43778e-06	0.000371289	0.000505945	0.000430429	0.000460415	0.000143879	0.000336468	0.000234025	0.000219032	0.000295993	0.000179857	0.000225763	5.25829e-05	0.00027249
170_RPNEG	16.64	260.207	[M-H]-	C00002032	5.1592	ChEBI=CHEBI:3931,KNApSAcK=C00002032,UNPD=UNPD125740	5281684	UIYRNLNPZZABGX-JSWQWYJJSA-N	[H]OC1([H])(C([H])([H])C([H])([H])C([H])(C([H])=C([H])C([H])=C([H])C([H])=C([H])C([H])=C([H])C([H])([H])C([H])([H])[H])N(C([H])([H])[H])C1([H])(C([H])([H])[H]))							174.91954 25;201.86736 18;223.92104 16;240.98964 21;	0.00166044	0	0	0	0.000332088	0	0	0	0.00056787	0.00063838	0.000731066	0.0014699	0.000144353	0.000257404	0.00023629	0.000188401	0.00019987	0.000308764	0.000680175	0.000410787	0.000238617	0.00031357	0.00027965	0.000286762	0.000703861	0.000496357	0.000519738	0.000558031	0.00032915	0.000511294	0.000528755	0.000502254	0.000801248
28_RPPOS	5.75	130.159	[M+H]+	1-Octanamine	5.1585	ChEBI=CHEBI:7728,STOFF=SI00005728	8143	IOQPZZOEVPZRBK-UHFFFAOYSA-N	[H]N([H])C([H])([H])C([H])([H])C([H])([H])C([H])([H])C([H])([H])C([H])([H])C([H])([H])C([H])([H])[H]							57.43053 91;59.65858 10;70.49255 12;73.96141 68;74.62819 539;89.34401 47;102.5076 18;112.33412 65;113.34666 49;	0.00111543	0.000764052	0.00116956	0.000848663	0.000938658	0.000795586	0.00145192	0.000884438	0.00127139	0.000808591	0.000762562	0.0008958	0.00262019	0.00306533	0.00131065	0.00330721	0.00310728	0.00227205	0.0108278	0.000838779	0.00575173	0.00132679	0.00159072	0.00140902	0.000579831	0.00628264	0.000717492	0.00298592	0.00133416	0.00100478	0.0010116	0.000720758	0.000712247
57_HilicNeg	12.04	313.129	[M-H]-	CHEBI:63557	5.1452	ChEBI=CHEBI:63557	17886	FOQABOMYTOFLPZ-ISLYRVAYSA-N	[H]OC([H])([H])C([H])([H])N(C2=C([H])C([H])=C(N=NC1=C([H])C([H])=C(C([H])=C1([H]))[N+](=O)[O-])C([H])=C2([H]))C([H])([H])C([H])([H])[H]							101.57321 23;105.54688 59;115.40579 13;127.19634 42;133.85379 34;149.23758 7114;149.84186 41;163.24199 574;164.39203 17;183.6568 47;184.34485 43;185.18657 61;185.86256 15;197.06244 21;198.12231 10;211.13287 11;223.88504 21;224.60892 13;225.51736 25;227.99356 12;230.01855 11;239.41806 22;251.28955 11;253.23303 38;267.1806 11;269.05969 55;276.9693 42;282.15729 11;285.41794 11;295.32657 134;	0.000402001	0.00020853	0.000426155	0.000343976	0.000234835	0.000591449	0.000450063	0.000150444	0	0.00041116	0.000332339	0.000331846	0.000241461	0.00129697	0.000117294	0.000351397	0.000214509	0	4.59394e-05	0	0.000691567	0	0	0.000288642	0.000609758	0.000378225	0.000126706	0.000651781	0.000265585	0.000981961	0.000309223	0.000463971	0.000667104
63_HilicNeg	5.67	346.178	[M-H]-	HMDB38837	5.1216	FooDB=FDB018272,HMDB=HMDB38837,UNPD=UNPD104292	-1	DWMBXHWBPZZCTN-UHFFFAOYNA-N	[H]OC=3C([H])=C([H])C=4C2=C([H])C(=C1OC(C([H])=C([H])C1=C2N([H])C=4(C=3([H])))(C([H])([H])[H])C([H])([H])C([H])([H])C([H])=C(C([H])([H])[H])C([H])([H])[H])C([H])([H])[H]	HMDB38827	4.6463	FooDB=FDB018257,HMDB=HMDB38827,UNPD=UNPD12536	-1	SIYXICWJEWHFMI-UHFFFAOYNA-N	[H]OC2([H])(C([H])([H])C6([H])(C1([H])(C5=C(OC2(C([H])([H])[H])(C1([H])([H])))C(=C([H])C=4C3=C([H])C([H])=C([H])C([H])=C3N(C=45)C6(C([H])([H])[H])(C([H])([H])[H]))C([H])([H])[H])))	125.43002 17;128.23248 300;198.12512 23;211.50873 10;231.40839 14;313.38232 39;327.40619 41;328.28769 35;	0	0.000579144	0.000612515	0	7.62572e-05	0.000471737	0.000138766	0	0	0	3.98289e-05	1.78483e-05	0	0.0003099	0	0.000484269	0	0	0	0	0	0	0	0	0.000221714	0	0.000450809	7.49351e-05	0	0	0.000473977	7.2705e-05	0
231_RPPOS	5.74	344.228	[M+H]+	HMDB14668	5.1135	ChEBI=CHEBI:59735; CHEBI:247956,DrugBank=DB00527,HMDB=HMDB14668,PubChem=3025,SMPDB=PW_C009024,STOFF=SI00003409	6078	PUFQVTATUTYEAL-UHFFFAOYSA-N	[H]C=2C([H])=C([H])C=1C(=NC(OC([H])([H])C([H])([H])C([H])([H])C([H])([H])[H])=C([H])C=1(C(=O)N([H])C([H])([H])C([H])([H])N(C([H])([H])C([H])([H])[H])C([H])([H])C([H])([H])[H]))C=2([H])	HMDB33959	4.519	ChEBI=CHEBI:70091,FooDB=FDB012178,HMDB=HMDB33959,UNPD=UNPD53356	16041826	HRMXETZEKQCWBC-UXBLZVDNSA-N	[H]C=2C([H])=C(C([H])=C([H])C([H])([H])C([H])([H])C([H])([H])C([H])([H])C([H])([H])C([H])([H])C([H])([H])C(=O)N1C([H])([H])C([H])([H])C([H])([H])C1([H])([H]))C([H])=C3OC([H])([H])OC=23	133.28044 20;176.74724 14;199.20462 15;203.16965 13;221.39438 24;233.34509 13;271.51318 12;282.07642 34;282.86621 45;314.52002 12;324.7962 35;327.14432 8467;327.83871 29;	0.000596266	0.000477808	0.000447332	0.000451446	0.000464237	0.000348336	0.000221828	0.000445463	0.00063572	0.000370351	0.00044539	0.000582169	0.000429373	0.000381208	0.00027508	0.000583697	0.000388623	0.000315568	0.000441095	0.00038598	0.000174844	0.000245937	0.000276106	0.000278931	0.000278156	0.000332652	1.75133e-05	6.35082e-05	0.0001608	0.000127391	0.00026004	0.000339535	0.000145945
1294_RPNEG	18.98	530.301	[M-H]-	CHEBI:62024	5.1049	ChEBI=CHEBI:62024	53262384	HTYZSQJQMYZWSD-AOPJIFPQSA-N	[H]OC(=O)C([H])([H])C([H])([H])C([H])([H])C([H])([H])C([H])([H])N([H])C(=O)C([H])([H])C([H])([H])SC=1C(=O)C([H])([H])C([H])([H])C4(C=1C([H])([H])C([H])([H])C2([H])(C4([H])(C([H])([H])C([H])([H])C3(C([H])([H])[H])(C([H])(C(=O)C([H])([H])[H])C([H])([H])C([H])([H])C23([H])))))(C([H])([H])[H])	DB04378	4.1464	DrugBank=DB04378,PubChem=446917	446917	APJAEXGNDLFGPD-AWCRTANDSA-N	[H]OC([H])(C([H])([H])C([H])(N([H])C(=O)C1=C([H])C([H])=C(C([H])=C1([H]))N([H])[H])C([H])([H])C([H])(C([H])([H])[H])C([H])([H])[H])C([H])(N([H])C(=O)C([H])([H])OC2=C(C([H])=C([H])C([H])=C2C([H])([H])[H])C([H])([H])[H])C([H])([H])C3=C([H])C([H])=C([H])C([H])=C3([H])	152.93056 37;168.2814 17;194.06647 20;224.23438 630;242.12665 346;255.26422 23208;256.19092 33;305.32587 24;356.85248 16;391.04248 106;414.02252 15;447.14435 11;463.91962 18;470.90454 37;510.1618 23;511.00977 40;	0.00264037	0.00229292	0.00287786	0.00169999	0.00251135	0.0030456	0.00125835	0.00403069	0.0027667	0.00292669	0.00309682	0.00252096	0.00160079	0.00217997	0.00275735	0.00336953	0.00253408	0.00322713	0.00281471	0.00272915	0.00279793	0.00257483	0.00290049	0.00332871	0.00209446	0.00301723	0.00280531	0.00352046	0.00262392	0.00277045	0.00377813	0.00275677	0.00521994
149_RPPOS	10.74	256.154	[M+H]+	C00002296	5.1027	ChEBI=CHEBI:6800,KNApSAcK=C00002296,UNPD=UNPD106508; UNPD117940; UNPD198867; UNPD70164; UNPD216011; UNPD218121	5281864	YZFJTFVPCWEPND-UEGMUGDPSA-N	[H]OC2([H])(C([H])(O[H])C1([H])(N(C([H])([H])[H])C2([H])(C([H])([H])C([H])(OC(=O)C(=C([H])C([H])([H])[H])C([H])([H])[H])C1([H])([H]))))	CHEBI:59977	4.9643	ChEBI=CHEBI:59977	13964946	SCHOZSZMRGHVKQ-UHFFFAOYNA-N	[H]OC([H])([H])C([H])(O[H])C([H])(O[H])C=1C([H])=C([H])N(C=1(C([H])=O))C([H])([H])C(C([H])([H])[H])(C([H])([H])[H])C([H])([H])[H]	102.66008 13;123.46394 35;163.46341 13;181.15199 45;183.26028 17;198.1705 11;199.27769 58;217.92691 19;219.53746 101;221.00246 275;228.28174 48;234.15932 13;238.50154 2319;239.10712 6758;255.85207 14;	0.000195878	0.000191685	0.000182128	0.000214845	0.000159227	1.16012e-05	0.000278055	0.000206851	0.000278229	2.83164e-05	0.000174951	0	0.000498983	0.000303156	4.91259e-05	0.000330067	0.00048053	0.000276752	0.00046811	0.000150632	0.000222402	0.000291918	0.000283702	0.000412621	0	0.000300144	5.88011e-06	0.000205832	6.75551e-05	0	0.000142117	5.27429e-05	2.35654e-05
205_RPPOS	9.89	318.191	[M+H]+	CHEBI:73052	5.0582	ChEBI=CHEBI:73052	71464531	OMXXOMUNJWASGK-UHFFFAOYNA-N	[H]OC(=O)C([H])([H])C([H])([H])C([H])([H])C([H])([H])C([H])([H])C([H])([H])C(=O)OC([H])(C([H])([H])C([H])([H])C(=O)[O-])[N+](C([H])([H])[H])(C([H])([H])[H])C([H])([H])[H]							91.33101 10;95.35738 49;97.42221 349;99.3927 418;101.34918 91;109.33742 251;111.3535 21;115.32404 174;121.39514 15;123.38077 128;125.20437 114;127.24908 64;137.20473 61;141.34277 104;143.17865 66;145.34067 23;147.34366 78;151.14957 83;155.22195 143;156.21024 152;156.99435 578;158.8938 34;161.37253 28;165.12665 124;167.30412 26;169.26033 359;183.41211 19;184.63525 11;186.4482 46;187.20686 22;189.3…	0.000148669	0.000144226	2.02453e-05	0.000168346	9.62973e-05	0	0.000205906	0	0.000190271	4.76601e-05	0.000104674	2.95126e-05	0.000614624	0.000445642	4.24711e-06	0.000455289	0.000599855	0.000412173	0.000514199	6.53712e-05	0.00029203	0.000400982	0.00039193	0.0004694	0.000152101	0.000317863	5.80751e-05	0	0.000197332	0.000211961	0.000214586	0.000203427	0.000282729
1086_RPNEG	15.64	439.085	[M-H]-	HMDB39307	5.0161	FooDB=FDB018857,HMDB=HMDB39307,UNPD=UNPD168381	-1	WVHDGXKUZIDTIN-UHFFFAOYNA-N	[H]OC3=C([H])C(O[H])=C([H])C(OC2([H])(OC([H])(C([H])([H])OC(=O)C1=C([H])C(O[H])=C(O[H])C(O[H])=C1([H]))C([H])(O[H])C([H])(O[H])C2([H])(O[H])))=C3([H])	DB02290	4.3724	DrugBank=DB02290,PubChem=657024	657024	KPHFGOGGKPGLTM-LKEWCRSYSA-N	[H]OC([H])([H])C([H])(O[H])C([H])(O[H])C([H])(O[H])C([H])([H])N2C(=O)N(C=1C(=O)N([H])C(=O)N([H])C=12)C([H])([H])C([H])([H])C([H])([H])OP(=O)(O[H])O[H]	251.54517 17;330.98212 33;335.20514 22;367.00015 16;419.01581 23;	0	0	0	0	0	0	0.00242813	0	0.00063343	0.000145491	0.000342292	0.00025124	0.000662002	0.000978605	0.000712248	0.000597567	0.000403767	0.000281558	0.000192907	0.000702591	0.00100176	0.000913103	0.000772218	0.000401788	0.000297387	0.000564982	0.000776193	0.000658132	0.000513509	0.00184695	0.000468372	0.000395487	0.00017339
437_RPPOS	1.77	635.142	[M+H]+	CHEBI:2448	4.9863	ChEBI=CHEBI:2448,PubChem=5280985	5280985	FXTIILIJTTYSLT-WYUUTHIRSA-N	[H]OC(=O)C([H])([H])C2([H])(OC([H])(C1=C(O[H])C=3C(=O)C(=C([H])C(=O)C=3(C(O[H])=C1C2([H])([H])))C4=C([H])C(=O)C=5C(O[H])=C6C(=C(O[H])C=5(C4(=O)))C([H])(OC([H])(C([H])([H])C(=O)O[H])C6([H])([H]))C([H])([H])[H])C([H])([H])[H])							217.01776 17;221.07564 13;227.40207 24;233.17722 191;274.18536 45;278.08536 256;279.16919 28;281.30191 22;287.97949 56;296.10602 48;306.18048 26;309.96173 57;316.23318 13;320.12445 190;330.12238 128;338.06873 29;344.22101 75;359.16333 12;361.96619 576;366.1424 14;374.16071 41;376.97693 4629;377.59674 11;412.95117 33;431.18933 69;431.93085 45;441.07953 38;442.47449 22;449.14136 200;451.81927 15;45…	0	0	1.39715e-05	0.000163149	3.5424e-05	0	9.17258e-05	0	3.86081e-05	7.16702e-06	3.31629e-05	5.61474e-05	0.000153965	0.000224867	0.000136875	0.000149714	0.00019086	0	0	0.000250871	8.87205e-05	0.000179997	0.000138355	0	0.000149824	0	3.19379e-05	1.43877e-05	0.000227871	2.33158e-06	0.000257515	0	2.59633e-05
43_RPNEG	14.42	149.061	[M-H]-	Benzenepropanoic acid	4.9384	BMDB=BMDB00764,ChEBI=CHEBI:28631; CHEBI:51057,DrugBank=DB02024,ECMDB=ECMDB00764,FooDB=FDB008271,HMDB=HMDB00764,PlantCyc=3-PHENYLPROPIONATE,PubChem=107; 4740700,UNPD=UNPD169043	107	XMIIGOLPHOKFCH-UHFFFAOYSA-N	[H]OC(=O)C([H])([H])C([H])([H])C1=C([H])C([H])=C([H])C([H])=C1([H])	Benzyl acetate	4.9027	ChEBI=CHEBI:52051,HMDB=HMDB31310,KNApSAcK=C00035535,PlantCyc=CPD-6501,PubChem=8785,T3DB=T3D3214,UNPD=UNPD118698,STOFF=SI00002721	8785	QUKGYYKBILRGFE-UHFFFAOYSA-N	[H]C1=C([H])C([H])=C(C([H])=C1([H]))C([H])([H])OC(=O)C([H])([H])[H]	129.1991 18;	0	0	0	0	0	0	0	0	0	0	0	0	0	0	0	0	0	0	0	0	0	0	0	0	0	0	0	0	0	0	0	0	0
650_RPNEG	14.79	346.176	[M-H]-	HMDB38837	4.9336	FooDB=FDB018272,HMDB=HMDB38837,UNPD=UNPD104292	-1	DWMBXHWBPZZCTN-UHFFFAOYNA-N	[H]OC=3C([H])=C([H])C=4C2=C([H])C(=C1OC(C([H])=C([H])C1=C2N([H])C=4(C=3([H])))(C([H])([H])[H])C([H])([H])C([H])([H])C([H])=C(C([H])([H])[H])C([H])([H])[H])C([H])([H])[H]	HMDB38827	4.3995	FooDB=FDB018257,HMDB=HMDB38827,UNPD=UNPD12536	-1	SIYXICWJEWHFMI-UHFFFAOYNA-N	[H]OC2([H])(C([H])([H])C6([H])(C1([H])(C5=C(OC2(C([H])([H])[H])(C1([H])([H])))C(=C([H])C=4C3=C([H])C([H])=C([H])C([H])=C3N(C=45)C6(C([H])([H])[H])(C([H])([H])[H]))C([H])([H])[H])))	128.24698 605;	0	0	0	0	0	0	0	0	0	0	0	0	0	0	0	0	0	0	0	0.000125078	0.000178957	0.000196276	0.000239651	0.00034372	0.000632172	0.000450284	0.0003001	0.000258647	0.000159397	0	0.000329645	0.000518918	0.000240042
1079_RPNEG	12.9	438.3	[M-H]-	CHEBI:78390	4.9098	ChEBI=CHEBI:78390	86289572	OKXWJISJKQKUTN-OAQYLSRUSA-N	[H]OC([H])(C([H])([H])OC([H])([H])C([H])([H])C([H])([H])C([H])([H])C([H])([H])C([H])([H])C([H])([H])C([H])([H])C([H])([H])C([H])([H])C([H])([H])C([H])([H])C([H])([H])C([H])([H])C([H])([H])C([H])([H])[H])C([H])([H])OP(=O)(O[H])OC([H])([H])C([H])([H])N([H])[H]	CHEBI:31231	4.518	ChEBI=CHEBI:31231,PubChem=5282105	5282105	MVVPIAAVGAWJNQ-DOFZRALJSA-N	[H]OC=1C([H])=C([H])C(=C([H])C=1(O[H]))C([H])([H])C([H])([H])N([H])C(=O)C([H])([H])C([H])([H])C([H])([H])C([H])=C([H])C([H])([H])C([H])=C([H])C([H])([H])C([H])=C([H])C([H])([H])C([H])=C([H])C([H])([H])C([H])([H])C([H])([H])C([H])([H])C([H])([H])[H]	289.88516 13;378.06137 17;379.34433 10;	0	0	0	0	0	0	0.00284636	0	0.000921466	0.000739111	0.000639848	0.00038201	0.00257776	0.00257367	0.00330085	0.00217322	0.00136265	0.0018688	0.000497251	0.00211594	0.00270258	0.003148	0.00235856	0.00122509	0.000423947	0.00115089	0.000817201	0	0.00136996	0.0011412	0.00110202	0.00179603	0.000241201
327_RPPOS	13.18	468.191	[M+H]+	HMDB31949	4.9001	FooDB=FDB008640,HMDB=HMDB31949,UNPD=UNPD24194	-1	GTQXJGMYZPFFKR-UHFFFAOYNA-N	[H]OC(=NC([H])([H])C2=C([H])C([H])=C(OC1([H])(OC([H])(C([H])([H])[H])C([H])(OC(=O)C([H])([H])[H])C([H])(OC(=O)C([H])([H])[H])C1([H])(OC(=O)C([H])([H])[H])))C([H])=C2([H]))OC([H])([H])C([H])([H])[H]	HMDB61123	4.7244	HMDB=HMDB61123,SMPDB=PW_C040669	-1	CFSXIBDXCWVFJR-QPLCGJKRSA-N	[H]OS(=O)(=O)OC1=C([H])C([H])=C(C([H])=C1([H]))C(C2=C([H])C([H])=C(OC([H])([H])C([H])([H])N(C([H])([H])[H])C([H])([H])[H])C([H])=C2([H]))=C(C3=C([H])C([H])=C([H])C([H])=C3([H]))C([H])([H])C([H])([H])[H]	223.27847 10;225.6067 17;237.5208 12;247.42401 19;253.07193 13;254.39951 36;260.99722 13;276.07822 12;282.28406 54;291.11902 13;295.53033 21;308.13092 27;335.51956 20;350.34634 12;353.15378 23;366.18762 12;375.22339 13;378.04199 21;379.40128 17;382.49069 10;394.20621 56;395.13956 286;407.29416 59;408.3226 39;411.22916 20;417.27158 15;431.30872 25;432.12527 31;433.12503 37;447.36948 26;450.31326 2…	0.00152798	0.000825891	0.00120616	0.00167175	0.00118137	0.000675077	0.00225055	0.00111233	0.00106842	0.00223726	0.00119004	0.000626749	0.00768942	0.00780241	0.00768673	0.0054673	0.00380634	0.0029827	0.00673785	0.00111873	0.00420016	0.00706591	0.00693594	0.00609816	0.00080599	0.000952034	0.0023096	0.000239399	0.00381292	0.00213819	0.00170549	0.000397706	0.00355059
1080_RPNEG	13.54	438.301	[M-H]-	CHEBI:78390	4.8847	ChEBI=CHEBI:78390	86289572	OKXWJISJKQKUTN-OAQYLSRUSA-N	[H]OC([H])(C([H])([H])OC([H])([H])C([H])([H])C([H])([H])C([H])([H])C([H])([H])C([H])([H])C([H])([H])C([H])([H])C([H])([H])C([H])([H])C([H])([H])C([H])([H])C([H])([H])C([H])([H])C([H])([H])C([H])([H])[H])C([H])([H])OP(=O)(O[H])OC([H])([H])C([H])([H])N([H])[H]	CHEBI:31231	4.7444	ChEBI=CHEBI:31231,PubChem=5282105	5282105	MVVPIAAVGAWJNQ-DOFZRALJSA-N	[H]OC=1C([H])=C([H])C(=C([H])C=1(O[H]))C([H])([H])C([H])([H])N([H])C(=O)C([H])([H])C([H])([H])C([H])([H])C([H])=C([H])C([H])([H])C([H])=C([H])C([H])([H])C([H])=C([H])C([H])([H])C([H])=C([H])C([H])([H])C([H])([H])C([H])([H])C([H])([H])C([H])([H])[H]	160.86134 13;357.49469 27;379.26263 22;401.09818 14;401.89334 10;	0	0	0	0	0	0	0.00233634	0	0.000897739	0.00123351	0.000673978	0.000244862	0.00208377	0.00256881	0.00338887	0.00224853	0.0012199	0.00138567	0.000668671	0.00194857	0.00239415	0.00278289	0.00220983	0.00145246	0.000619551	0.00146421	0.000979778	0	0.00131027	0.00150486	0.00127998	0.00115221	0.000356511
411_RPPOS	17.61	570.283	[M+H]+	CHEBI:61792	4.8769	ChEBI=CHEBI:61792	51351748	PQFHDYATQNVYHS-RXJHVRFISA-N	[H]OC3([H])(OC([H])(C([H])([H])[H])C([H])(O[H])C([H])(OC2([H])(OC([H])(C([H])([H])[H])C([H])(O[H])C([H])(OC1([H])(OC([H])(C([H])([H])[H])C([H])(N([H])C(=O)C([H])([H])C(O[H])(C([H])([H])[H])C([H])([H])[H])C([H])(O[H])C1([H])(OC([H])([H])[H])))C2([H])(O[H])))C3([H])(O[H]))							183.4048 11;185.17038 13;195.38464 14;200.89879 25;203.54474 21;205.32286 21;209.28641 30;211.10701 25;213.38922 31;215.4886 15;223.26552 22;227.27686 137;234.52567 12;237.23553 20;239.14511 12;242.09262 63;251.30759 11;267.85779 15;269.27924 21;275.19513 21;283.14447 22;290.9838 10;293.24561 281;311.28375 212;316.45758 26;335.02814 14;343.36456 19;354.79187 11;356.08746 39;358.41608 29;361.33459…	1.60518e-05	7.75437e-05	0	0	1.87191e-05	0	0.000176538	8.53485e-05	0.000115175	0.000153076	3.0809e-06	5.33366e-05	0.000184812	0.000188304	4.99261e-06	0.00021296	0.000171129	0	0.000106489	0.000117446	0.000255419	0.000246951	0.000211059	0.000228179	0	0.000178387	0.00021544	3.94648e-05	0.000189517	0.000230236	0.000281374	0.0003311	0.000221441
338_RPPOS	16.61	474.243	[M+H]+	CHEBI:79120	4.8727	ChEBI=CHEBI:79120	86289763	CSYZPSXDHSFGRE-JMPAYUSGSA-N	[H]OC(=O)C([H])=C([H])C([H])([H])C([H])([H])C([H])([H])C([H])([H])C([H])([H])C([H])([H])C([H])([H])C([H])([H])OC3([H])(OC([H])(C([H])([H])[H])C([H])(OC(=O)C1=C([H])N([H])C=2C([H])=C([H])C([H])=C([H])C1=2)C([H])([H])C3([H])(O[H]))	CHEBI:79104	4.8613	ChEBI=CHEBI:79104	86289752	KOWFSBKIGJUBRC-LBOPOTOASA-N	[H]OC(=O)C([H])=C([H])C([H])([H])C([H])([H])C([H])([H])C([H])([H])C([H])([H])C([H])([H])C([H])(OC3([H])(OC([H])(C([H])([H])[H])C([H])(OC(=O)C1=C([H])N([H])C=2C([H])=C([H])C([H])=C([H])C1=2)C([H])([H])C3([H])(O[H])))C([H])([H])[H]	156.27872 16;165.26759 19;174.18051 18;233.48164 18;239.9931 12;243.87207 16;276.29776 29;281.09326 24;291.17764 15;298.03656 20;305.97397 11;314.08752 12;317.32227 16;327.08588 14;344.58051 11;358.24374 15;365.2178 17;368.59586 11;369.68857 12;371.14771 19;396.84058 19;405.40884 13;410.42419 34;414.81314 146;415.41556 191;416.56903 76;420.63309 14;438.31363 24;441.25159 18;444.75806 12;451.65421…	0	0	0.000112054	0	2.24107e-05	0	0	9.40365e-05	0	3.3762e-06	8.50497e-05	0	7.54984e-06	0.000197471	0	0.000204256	0.00017543	0	8.47934e-05	0	9.42515e-05	0.000218573	8.63937e-07	6.00735e-05	3.95953e-05	0.000226182	0.000160176	3.43114e-05	0.000217775	0.000189068	0.000321492	0.000338864	0.00025438
23_RPPOS	5.91	122.096	[M+H]+	2,6-Dimethylaniline	4.8592	ChEBI=CHEBI:28738,HMDB=HMDB60677,PubChem=6896,SMPDB=PW_C040580,T3DB=T3D4218,UNPD=UNPD30819,STOFF=SI00005524	6896	UFFBMTHBGFGIHF-UHFFFAOYSA-N	[H]C=1C([H])=C(C(=C(C=1([H]))C([H])([H])[H])N([H])[H])C([H])([H])[H]	3,4-Dimethylaniline	4.7878	ChEBI=CHEBI:39901,DrugBank=DB03018,PubChem=7248,UNPD=UNPD42431,STOFF=SI00006713	7248	DOLQYFPDPKPQSS-UHFFFAOYSA-N	[H]C1=C([H])C(=C(C([H])=C1N([H])[H])C([H])([H])[H])C([H])([H])[H]	56.52694 24;81.44891 13;104.24724 1222;105.48904 19;107.39674 21;	0.000807923	0.000708957	0.000635161	0.000724892	0.000659652	0.000421325	0.000687296	0.000512943	0.00071972	0.000387767	0.000560956	0.000626264	0.000532949	0.000468728	0.000105117	0.000643882	0.000670842	0.00154867	0.000675376	0.000658128	0.000330136	0.00038523	0.000564381	0.000360493	0	0.000172965	1.52055e-05	0.00032267	7.56223e-05	2.0474e-05	0.000220826	5.2899e-05	2.48969e-05
348_RPPOS	19.46	482.361	[M+H]+	CHEBI:34114	4.8039	ChEBI=CHEBI:34114; CHEBI:64496,UNPD=UNPD145197	3983	VLBPIWYTPAXCFJ-UHFFFAOYNA-N	[H]OC([H])(C([H])([H])OC([H])([H])C([H])([H])C([H])([H])C([H])([H])C([H])([H])C([H])([H])C([H])([H])C([H])([H])C([H])([H])C([H])([H])C([H])([H])C([H])([H])C([H])([H])C([H])([H])C([H])([H])C([H])([H])[H])C([H])([H])OP(=O)([O-])OC([H])([H])C([H])([H])[N+](C([H])([H])[H])(C([H])([H])[H])C([H])([H])[H]	CHEBI:77696	4.768	ChEBI=CHEBI:77696	86289334	RKKJZVVEVRCBJA-XMMPIXPASA-N	[H]OC([H])([H])C([H])(OC([H])([H])C([H])([H])C([H])([H])C([H])([H])C([H])([H])C([H])([H])C([H])([H])C([H])([H])C([H])([H])C([H])([H])C([H])([H])C([H])([H])C([H])([H])C([H])([H])C([H])([H])C([H])([H])[H])C([H])([H])OP(=O)([O-])OC([H])([H])C([H])([H])[N+](C([H])([H])[H])(C([H])([H])[H])C([H])([H])[H]	168.08173 29;171.37164 13;181.19409 71;184.20255 71;185.16481 13;186.09946 53;191.29236 11;214.44949 12;239.26636 13;240.07103 23;241.01065 14;250.20773 33;282.77127 49;283.88809 12;318.16193 23;324.02634 26;324.67517 17;340.17862 20;343.3591 17;357.83911 48;359.06497 21;360.34265 26;380.15668 13;383.24582 17;390.93942 20;405.41339 33;419.19308 37;421.30734 646;422.86685 15;446.29941 14;453.79642…	0.000284624	0.000221063	0.000295694	0.000183897	0.000197056	0	0.000203469	0.000181926	0.000424572	0.000213017	0.000224372	0.000170267	0.000298789	0.000373871	0.000229573	0.000336175	0.000419504	0.00028373	0.000331598	0.000324664	0.00032523	0.000389252	0.000382487	0.000295061	6.03997e-05	0.000323633	0.000266583	0.000213978	0.000248709	0.00024607	0.000567599	0.000563043	0.00036809
898_RPNEG	12.19	370.306	[M-H]-	HMDB05066	4.7977	BMDB=BMDB05066,ChEBI=CHEBI:84634; CHEBI:73061,FooDB=FDB023615,HMDB=HMDB05066,YMDB=YMDB01531	53477791	PSHXNVGSVNEJBD-LJQANCHMSA-N	[H]C([H])([H])C([H])([H])C([H])([H])C([H])([H])C([H])([H])C([H])([H])C([H])([H])C([H])([H])C([H])([H])C([H])([H])C([H])([H])C([H])([H])C([H])([H])C(=O)OC([H])(C([H])([H])C(=O)[O-])C([H])([H])[N+](C([H])([H])[H])(C([H])([H])[H])C([H])([H])[H]							135.19176 26;205.25714 13;229.25574 15;244.06403 14;247.02344 17;283.11615 40;287.27246 19;310.63654 10;352.32861 14;	0	0	0	0	0	0	0	0	0	0	0	0	0	0	0	0	0	0	0	0	0	0	0	0	0	0	0	0	0	0	0	0	0
56_HilicNeg	7.46	313.129	[M-H]-	CHEBI:63557	4.7926	ChEBI=CHEBI:63557	17886	FOQABOMYTOFLPZ-ISLYRVAYSA-N	[H]OC([H])([H])C([H])([H])N(C2=C([H])C([H])=C(N=NC1=C([H])C([H])=C(C([H])=C1([H]))[N+](=O)[O-])C([H])=C2([H]))C([H])([H])C([H])([H])[H]							105.4411 52;143.366 33;149.23819 4800;149.94984 31;163.21182 396;165.36014 18;183.98283 27;185.02608 33;221.26462 32;225.07269 11;241.09293 19;251.25497 99;253.36682 46;275.46423 17;277.43329 40;294.17545 14;295.06207 176;	0.000539116	0.000493978	0.000643998	0.000923486	0.000549635	0.000575322	0.000844171	0.000713131	0	0.000745892	0.00078366	0.000846303	0.00149322	0.00136756	0.00103572	0.00124438	0.00092672	0.000453185	0.00193728	0	0.00114042	0	0	0.00105192	0.000678717	0.00117456	0.000730883	0.000762395	0.00103631	0.00111793	0.000919246	0.000925231	0.000380092
180_RPPOS	16.7	298.31	[M+H]+	Kalinin	4.6926	HMDB=HMDB31810,T3DB=T3D4939,STOFF=SI00004291	-1	YTOPFCCWCSOHFV-UHFFFAOYNA-N	[H]C([H])([H])C([H])([H])C([H])([H])C([H])([H])C([H])([H])C([H])([H])C([H])([H])C([H])([H])C([H])([H])C([H])([H])C([H])([H])C([H])([H])C([H])([H])N1C([H])([H])C([H])(OC([H])(C([H])([H])[H])C1([H])([H]))C([H])([H])[H]							93.0648 35;95.37914 714;97.48304 61;101.56008 15;109.32065 546;111.39005 36;123.36122 355;125.39319 23;136.68234 13;137.50807 94;151.40796 42;161.32562 13;165.33371 109;175.0929 22;179.16553 37;183.17221 199;183.8187 18;193.22736 23;199.25696 29;216.28998 12;224.10416 16;239.25397 50713;239.89471 193;262.7601 49;266.14725 40;274.97089 17;280.13611 44;281.11646 132;282.21201 23;289.11795 14;	0.000969306	0.000926418	0.000763047	0.000931633	0.000835019	0.000584692	0	0.000915328	0.000881334	0.00070874	0.00057754	0.00063125	0	3.91395e-05	0	0	0	4.53794e-05	0	0.000830312	0	0	0	0	0.000421145	0.00116888	0.000795336	0.000611634	0.000643281	0.000576105	0.000940147	0.00072453	0.000870871
132_RPPOS	15.38	230.248	[M+H]+	CHEBI:73882	4.6855	ChEBI=CHEBI:73882,UNPD=UNPD124814; UNPD128312	14756407	WMUMHAZHWIUBPN-UONOGXRCSA-N	[H]OC([H])(C([H])([H])C([H])([H])C([H])([H])C([H])([H])C([H])([H])C([H])([H])C([H])([H])C([H])([H])C([H])([H])C([H])([H])C([H])([H])[H])C([H])(N([H])[H])C([H])([H])[H]	dodecyldimethylamine oxide	4.3855	DrugBank=DB04147,PubChem=15433,STOFF=SI00000170	15433	SYELZBGXAIXKHU-UHFFFAOYSA-N	[H]C([H])([H])C([H])([H])C([H])([H])C([H])([H])C([H])([H])C([H])([H])C([H])([H])C([H])([H])C([H])([H])C([H])([H])C([H])([H])C([H])([H])[N+]([O-])(C([H])([H])[H])C([H])([H])[H]	72.68061 21;84.32008 18;85.59277 21;93.54329 14;124.23724 13;147.92342 30;159.31613 11;173.98192 13;195.19911 18;202.13431 12;206.97595 24;212.23503 1119;213.03287 79;220.61409 14;	0.000347092	0.000181646	0.000466378	0.000374054	0.00045492	0.000905432	0.000171112	0.000571786	0.001092	0.000619982	0.000405917	0.000406375	0.000388819	0.000236465	0.000257876	0.00474795	0.000266885	0.000427967	0.000396045	0.000431056	0.000359314	0.000372429	0.000214029	0.000467708	0.000359557	0.00153579	0.000519878	0.00188611	0.000443272	0.00316731	0.00125855	0.000462164	0.000769696
904_RPNEG	14.2	376.187	[M-H]-	C00002331	4.64	ChEBI=CHEBI:3932,KNApSAcK=C00002331,UNPD=UNPD70969	92765	RSHYSOGXGSUUIJ-OAHLLOKOSA-N	[H]C1=C([H])C3=C(C([H])=C1(OC([H])([H])[H]))C=2C([H])=C(OC([H])([H])[H])C(OC([H])([H])[H])=C([H])C=2C5=C3C([H])([H])N4C([H])([H])C([H])([H])C([H])([H])C([H])([H])C4([H])C5([H])([H])	C00025280	4.4405	ChEBI=CHEBI:31504,KNApSAcK=C00025280,UNPD=UNPD77366; UNPD3038	443773	MXIZZLBQRBAZEX-HUUCEWRRSA-N	[H]OC1=C(C([H])=C([H])C2=C1C([H])(N([H])C([H])(C([H])([H])[H])C2([H])([H]))C([H])([H])[H])C=3C=4C([H])=C([H])C([H])=C(OC([H])([H])[H])C=4(C(OC([H])([H])[H])=C([H])C=3C([H])([H])[H])	140.97441 22;142.21329 1948;155.2233 207;156.16534 68;163.11346 11;163.98714 11;187.14783 18;205.34328 52;218.33603 18;220.19125 1796;221.26587 398;233.31918 387;276.07886 153;289.80096 18;297.15616 34;300.97836 13;318.90414 20;320.15677 59;339.99207 20;345.89044 10;355.95804 56;356.99783 20;	0	0	0	0	0	0	0	0	0	0	0	0	0	0	0	0	0	0	0	0	0	0	0	0	0	0	0	0	0	0	0	0	0
257_RPPOS	6.16	388.254	[M+H]+	CHEBI:62042	4.6104	ChEBI=CHEBI:62042	11977776	PPELYUTTZHLIAZ-CSPZMSETSA-N	[H]OC(=O)C([H])([H])ON=C4C([H])=C3C([H])([H])C([H])([H])C1([H])(C([H])(C([H])([H])C([H])([H])C2(C([H])([H])[H])(C([H])(C(=O)C([H])([H])[H])C([H])([H])C([H])([H])C12([H])))C3(C([H])([H])[H])C([H])([H])C4([H])([H]))							110.21659 18;169.9747 26;174.30804 14;176.1067 16;177.26424 28;210.24129 30;213.25186 11;224.16449 11;225.97464 11;258.32388 24;261.25787 27;264.12207 20;265.27545 48;278.18564 16;283.19238 39;308.2048 14;308.99048 13;325.18771 27;351.14728 17;352.30215 23;353.20309 18;364.03415 11;371.18924 7574;	0.000799356	0.0006889	0.000514566	0.000622029	0.000631565	0.000532973	0.000466921	0.000808859	0.000806264	0.000685492	0.000744628	0.000773089	0.000704037	0.000535763	0.000669241	0.00077008	0.000695427	0.000775986	0.000667664	0.000581422	0.000436964	0.000438135	0.000569702	0.000586237	0.000651334	0.000585723	0.000500077	1.94587e-05	0.00038249	0.000313135	0.000458711	0.000589348	0.000395514
81_HilicPos	11.95	176.02	[M+H]+	HMDB31573	4.5423	FooDB=FDB008193,HMDB=HMDB31573,UNPD=UNPD108725	-1	QKGJFQMGPDVOQE-HWKANZRONA-N	[H]C(=C([H])S(=O)C([H])([H])[H])C([H])([H])C([H])([H])N=C=S							112.96364 12;135.04475 24;158.83073 12;	0.0002365	0.000151638	0.000118451	0.000119985	0.000227845	0	0.000140536	0.000190949	0	0.000129394	0.000129725	9.232e-05	3.99149e-05	0.000483616	0	0.000440669	0.000263649	0.000111606	0	0	0.000352601	0.000211553	0	0.000278192	0.000193688	0.000472443	0.000528187	0.000492811	0.000229529	0.000419177	0.000204503	0.000573769	0.000384202
81_HilicNeg	5.68	503.968	[M-H]-	3'-Keto-3'-deoxy-ATP	4.4952	ChEBI=CHEBI:27782,PubChem=441212; 46173507	441212	DWVQEFBZTUVQKH-XMRAEQSQSA-N	[H]OC3([H])(C(=O)C([H])(OC3([H])(N2C([H])=NC=1C(=NC([H])=NC=12)N([H])[H]))C([H])([H])OP(=O)(O[H])OP(=O)(O[H])OP(=O)(O[H])O[H])	DB02836	4.4897	DrugBank=DB02836,PubChem=46936505	46936505	NGYWTCOGOZELRS-KHLHZJAASA-N	[H]OP(=O)(O[H])OP(=O)(O[H])OC([H])([H])C3([H])(OC([H])(N2C([H])=NC=1C(=O)N([H])C(=NC=12)N([H])[H])C4([H])(OP(=O)(O[H])OC34([H])))	153.11555 20;171.57104 14;201.2738 26;245.13847 11;255.40454 17;271.28113 24;297.25452 18;329.15466 11;353.02084 10;354.96143 14;371.43561 34;415.76337 12;417.31079 20;425.22205 31;439.3143 21;441.39713 19;442.81955 11;443.42673 29;445.2023 11;446.26028 39;459.05957 50;460.43622 31;467.20929 12;468.46664 27;485.3233 194;486.37164 53;	0.000380518	0.000277265	0.000181928	0.000301322	0.000236158	0	0	0.000326816	0	0	0.000386591	0.000406226	0.00276488	0.002285	0.00262301	0.00166577	0.00108353	0.000952287	0.000404714	0	0.00119051	0	0	0.000461724	0.000925972	0.0027387	0.00162664	0.0018232	0.003181	0.00140103	0.000823048	0.00270471	0.000961503
482_RPNEG	9.15	335.107	[M-H]-	HMDB33927	4.4817	ChEBI=CHEBI:20013; CHEBI:38158; CHEBI:58488,FooDB=FDB012127,HMDB=HMDB33927,PlantCyc=CPD-7289,PubChem=25201082,UNPD=UNPD136647	10947671	QPIOQLJXMZWNFJ-LJASKYJCSA-N	[H]OC(=O)C([H])(O[H])C([H])([H])C([H])([H])N([H])C([H])(C(=O)O[H])C([H])(O[H])C([H])([H])N1C([H])([H])C([H])(O[H])C1([H])(C(=O)O[H])	DB08034	3.9317	DrugBank=DB08034,PubChem=9562794	9562794	TVOPERZEGKBKAY-RGVLZGJSSA-N	[H]OC=1C([H])=C([H])C(=C([H])C=1(O[H]))C(=O)N([H])N=C([H])C3=C(OC([H])([H])[H])C([H])=C([H])C2=C([H])C([H])=C([H])C([H])=C23	213.81799 22;270.69345 32;296.56924 20;297.25391 285;298.23154 19;299.07938 11;315.33606 37;317.35651 16;	0.0117139	0.0125257	0.0135481	0.015041	0.0139726	0.0170342	0.00388239	0.0170994	0.00699269	0.00505809	0.00526916	0.00365446	0.00208415	0.00119312	0.000569465	0.0027434	0.00320075	0.00348037	0.00299311	0.00175717	0.000786268	0.00149213	0.0018104	0.00315282	0.0037531	0.00304113	0.00233423	0.00245427	0.00160477	0.00081785	0.00203517	0.00164714	0.00129879
314_RPPOS	15.7	453.167	[M+H]+	CHEBI:73626	4.4768	ChEBI=CHEBI:73626	71464647	CWZGXBPVGJVJRZ-YSZBBASGSA-N	[H]OC(=O)C([H])(N([H])[H])C([H])(O[H])C([H])([H])C4=C(N=C2N4(C(=O)C=1N=C([H])N(C=1N2C([H])([H])[H])C3([H])(OC([H])(C([H])([H])O[H])C([H])(O[H])C3([H])(O[H]))))C([H])([H])[H]							185.33215 16;222.89343 22;234.31281 15;237.23975 19;269.271 19;277.13928 22;321.11374 16;354.99384 10;359.14035 21;371.9624 21;394.42108 16;395.31113 14;434.31512 22;435.37387 56;	0.000863212	0.000793854	0.000979557	0.000663744	0.000848081	0.000940037	0.000793965	0.00114336	0.000894114	0.00100226	0.000967708	0.000803381	0.00069404	0.000598609	0.00128937	0.000871948	0.000898369	0.00131836	0.000706794	0.000764069	0.000835573	0.000547769	0.000877625	0.000996815	0.0013285	0.000610208	0.0012465	0.00139451	0.00113961	0.000827155	0.000997378	0.00108134	0.000695221
217_RPPOS	19.35	332.332	[M+H]+	C00015671	4.451	ChEBI=CHEBI:66758,KNApSAcK=C00015671,UNPD=UNPD186683	10664275	YMMNFUJNCOWQRX-UHFFFAOYSA-N	[H]C1=C([H])C([H])=C(C([H])=C1([H]))C([H])([H])N(C([H])([H])[H])C([H])([H])C([H])([H])C([H])([H])C([H])([H])C([H])([H])C([H])([H])C([H])([H])C([H])([H])C([H])([H])C([H])([H])C([H])([H])C([H])([H])C([H])([H])C([H])([H])C([H])([H])[H]							134.44675 19;136.45557 34;139.15924 12;140.15816 16;163.11978 18;165.13937 24;174.64316 13;185.19612 26;197.27469 16;203.34631 45;219.44641 12;225.20703 12;232.32507 31;237.05026 18;240.28943 10993;241.47366 358;248.11963 11;249.78012 49;255.11249 21;258.15683 10;260.30768 32;261.03223 11;264.09412 24;266.52878 17;273.58817 72;275.14618 27;302.15424 12;303.40546 18;308.75983 30;309.70465 20;313.7…	0.00110776	0.00131313	0.00098908	0.00181661	0.0013132	0.0013394	0.00117278	0.00134995	0.00135858	0.0011171	0.00106337	0.00134073	0.00153366	0.00115097	0.000992504	0.000968157	0.00142583	0.00100816	0.00185841	0.00164583	0.000935307	0.00113976	0.00135265	0.00112368	0.000991831	0.00146881	0.000986945	0.000995646	0.000996241	0.000913789	0.00134257	0.00105808	0.00128551
1198_RPNEG	15.83	449.172	[M-H]-	CHEBI:67629	4.4447	ChEBI=CHEBI:67629	56680032	TXNROPYUDLUIHU-SDVFQCAASA-N	[H]OC=1C(OC([H])([H])[H])=C([H])C(=C([H])C=1(OC([H])([H])[H]))C3([H])(OC([H])(C2=C([H])C(OC([H])([H])[H])=C(OC([H])([H])[H])C(OC([H])([H])[H])=C2([H]))C([H])(C([H])([H])O[H])C3([H])(C([H])([H])O[H]))							240.24588 16;241.04581 15;284.90094 30;293.05032 11;300.80283 20;319.28427 17;345.12 26;365.23419 53;369.04388 41;372.90353 17;382.8121 29;389.06723 31;411.15097 71;413.44278 19;418.05215 11;428.99948 141;429.96637 22;	0.00467359	0.00618068	0.00605347	0.00511359	0.00608856	0.00842146	0.00111727	0.00830652	0.00347611	0.00226337	0.00289137	0.00280205	0.00076671	0.00160509	0.00203826	0.00266594	0.00138144	0.00238551	0.00464718	0.00309506	0.00209147	0.00254652	0.00317488	0.00488665	0.00521711	0.00485088	0.00411114	0.00624368	0.00200871	0.00223533	0.00360528	0.003037	0.00494838
72_HilicNeg	5.64	421.155	[M-H]-	Ochrindole D	4.4381	PubChem=10432364	10432364	KTLJMAJOQBABFT-UHFFFAOYSA-N	[H]OC3=C(C(=O)C(=O)C(C1=C([H])N([H])C2=C([H])C([H])=C([H])C([H])=C12)=C3C([H])([H])C([H])=C(C([H])([H])[H])C([H])([H])[H])C4=C([H])N([H])C5=C([H])C([H])=C([H])C([H])=C45							238.38098 15;272.27426 20;305.54932 14;323.29819 11;361.28369 15;385.25546 240;402.5824 13;403.28946 48;	0.00841148	0.00759015	0.00774652	0.00977034	0.00711899	0.0074535	0.00902386	0.00796048	0	0.00946152	0.00804077	0.00820607	0.0135086	0.0249015	0.0253791	0.0122334	0.00704547	0.00951303	0.0278295	0	0.0272515	0	0	0.00748966	0.0100433	0.0262243	0.0145677	0.0175564	0.0348694	0.0436656	0.0116119	0.0208567	0.00914636
1059_RPNEG	15.6	435.107	[M-H]-	HMDB38831	4.3954	FooDB=FDB018264,HMDB=HMDB38831,KNApSAcK=C00008904,UNPD=UNPD8098	21629801	GQGIIUWXMCBYIJ-UMMIVNDFSA-N	[H]OC4=C([H])C(O[H])=C3C(OC([H])(C1=C([H])C(O[H])=C(O[H])C(O[H])=C1([H]))C([H])(OC(=O)C([H])=C([H])C2=C([H])C([H])=C([H])C([H])=C2([H]))C3([H])([H]))=C4([H])	DB07691	3.9402	DrugBank=DB07691,PubChem=24941254	24941254	GYILVHHTCYNIOS-UHFFFAOYSA-N	[H]OC(=O)C=1C([H])=C([H])C([H])=C([H])C=1N([H])C(=O)C2=C([H])C([H])=C([H])C(=C2([H]))S(=O)(=O)N4C([H])([H])C3=C([H])C([H])=C([H])C([H])=C3C([H])([H])C4([H])([H])	262.69479 12;285.16382 12;329.54044 20;351.08221 23;355.04254 20;357.32764 13;360.19269 10;366.7645 22;374.8931 22;376.58249 12;415.05569 145;415.88458 25;	0	0	0	0	0	0	0.00407751	0	0.00111283	0.000948609	0	0.000538033	0.001585	0.00278899	0.00351537	0.00127967	0.000954578	0.00108173	0.00106976	0.00221613	0.00358466	0.00199398	0.00213985	0.000840931	0.000440002	0.00150943	0.00230234	0.00216073	0.00284567	0.00455585	0.000981399	0.00188072	0.000599179
240_RPPOS	19.69	360.324	[M+H]+	HMDB35516	4.3712	FooDB=FDB014208,HMDB=HMDB35516,UNPD=UNPD174720	85697559	XPASABMPOWTXIB-UHFFFAOYSA-N	[H]C=1N=C(C([H])=C([H])C=1C(=O)C([H])([H])C([H])([H])C([H])([H])C([H])([H])C([H])([H])C([H])([H])C([H])([H])C([H])([H])C([H])([H])[H])C([H])([H])C([H])([H])C([H])([H])C([H])([H])C([H])([H])C([H])([H])C([H])([H])C([H])([H])C([H])([H])[H]							116.39906 61;184.35007 18;186.35532 52;213.08414 21;214.25653 38;217.15176 18;218.22485 35;229.46896 20;231.88297 81;233.15631 24;255.12448 25;280.86835 31;296.28336 10;300.71997 11;324.40955 442;331.901 12;336.09866 23;340.05408 15;342.52164 35;343.26395 24;345.19321 18;	0.00016815	0	0	0	3.36299e-05	0	0	0.00012646	0.00017303	7.18836e-05	0	0	8.52826e-05	3.71704e-05	0.000344719	0.000733833	0.000120967	4.30325e-05	0.000241658	0	0.000260072	0.000148129	2.31107e-05	0.00025034	5.21453e-06	0.000676385	0.000380582	0.000624227	0.000239054	0.00103461	0.000942081	0.000332922	0.000738212
14_HilicNeg	7.46	149.061	[M-H]-	2-Methoxy-4-vinylphenol	4.3517	ChEBI=CHEBI:42438,DrugBank=DB03514,HMDB=HMDB13744,KNApSAcK=C00029546,UNPD=UNPD42611,YMDB=YMDB01624	332	YOMSJEATGXXYPX-UHFFFAOYSA-N	[H]OC=1C([H])=C([H])C(C([H])=C([H])[H])=C([H])C=1(OC([H])([H])[H])	(2E,4E,6E)-4-methylocta-2,4,6-trienedial	4.3243	ChEBI=CHEBI:53176,PlantCyc=CPD-13370,PubChem=44224057	44224057	HLZZDTVXNYNFKH-BNFXUGDESA-N	[H]C(=O)C([H])=C([H])C([H])=C(C([H])=C([H])C([H])=O)C([H])([H])[H]	105.26517 33;	0.00142542	0.000986592	0.00154282	0.00208006	0.00122974	0.00069276	0.00147727	0.00172602	0	0.00219673	0.0016732	0.00158936	0.00540625	0.00579175	0.00451528	0.00317346	0.00237171	0.00176559	0.00742895	0	0.00541797	0.000429218	0	0.00239446	0.00145971	0.00377816	0.00265578	0.00111949	0.00399581	0.00411439	0.00208998	0.00415303	0.000692243
1316_RPNEG	17.43	568.266	[M-H]-	CHEBI:61792	4.3468	ChEBI=CHEBI:61792	51351748	PQFHDYATQNVYHS-RXJHVRFISA-N	[H]OC3([H])(OC([H])(C([H])([H])[H])C([H])(O[H])C([H])(OC2([H])(OC([H])(C([H])([H])[H])C([H])(O[H])C([H])(OC1([H])(OC([H])(C([H])([H])[H])C([H])(N([H])C(=O)C([H])([H])C(O[H])(C([H])([H])[H])C([H])([H])[H])C([H])(O[H])C1([H])(OC([H])([H])[H])))C2([H])(O[H])))C3([H])(O[H]))							282.22604 15;339.03992 14;349.3056 18;351.5141 11;355.33453 17;361.23566 13;412.14026 15;415.46539 12;450.35962 12;459.55469 15;463.14191 330;481.19623 14561;483.86444 11;488.16791 20;492.14069 14;499.11578 12;531.7356 11;547.24225 27;	0	0	0	0	0	0	0	0	0	0	0	0	5.67578e-05	0	0.000213868	0	0	0	0	0.000217448	0.000652345	0	0.000413019	0.000586711	0	0	0.000311259	0.000469395	0.000414799	0.000672103	0.000778107	0.000477917	0.000877272
118_RPPOS	1.77	208.154	[M+H]+	HMDB30354	4.3252	ChEBI=CHEBI:2815,FooDB=FDB002199,HMDB=HMDB30354,KNApSAcK=C00001962,UNPD=UNPD74	442505	JICZMZVYTMAXGX-KHSUWTBESA-N	[H]N=C1N([H])C(=O)C([H])(C([H])([H])[H])C2([H])(N1C(C([H])=C([H])[H])(C([H])([H])[H])C([H])([H])C2([H])([H]))	C00002312	4.2004	ChEBI=CHEBI:2552,KNApSAcK=C00002312,UNPD=UNPD32950	442841	OWOGBGTWYNGTCR-UHFFFAOYNA-N	[H]C([H])=C(C([H])([H])[H])C2([H])(N=C1N([H])C(C([H])([H])[H])(C([H])([H])[H])C([H])([H])C(=O)N1C2([H])([H]))	65.79725 14;67.59682 13;68.4733 28;69.45988 10;70.52164 645;71.33517 16;72.54092 43;74.32794 125;76.39985 15;77.47505 18;79.45129 171;81.55397 20;84.87057 31;86.48721 128;88.25713 620;94.36908 138;96.45311 396;97.43898 24;98.50439 16;102.38521 27;114.45848 151;115.40782 42;118.54677 19;119.16859 27;126.37938 38;128.23082 23;132.34204 531;135.50293 13;140.2776 11;144.20937 64;146.24744 4135;147.12…	0	0	0	0.000156478	3.12956e-05	0	0	0.000133879	0.0002266	0.00018059	4.04843e-05	0.000155003	0.000156746	9.63584e-05	0.000363962	0.000139776	0.000122568	0.000118932	0.000136426	0.000153703	0.000131047	0	0	0	0	0	0	2.58042e-05	8.18729e-05	0	1.16623e-05	0.000168905	5.90748e-05
928_RPNEG	15.62	416.182	[M-H]-	HMDB30274	4.3186	ChEBI=CHEBI:3451,FooDB=FDB002106,HMDB=HMDB30274,KNApSAcK=C00002321,UNPD=UNPD191464	5281818	CSFQQZOIHVWGMN-BBAXEOEJSA-N	[H]OC([H])([H])C3([H])(OC([H])(N1C([H])=NC(=C1([H]))C([H])([H])C([H])([H])N(C(=O)C([H])=C([H])C2=C([H])C([H])=C([H])C([H])=C2([H]))C([H])([H])[H])C([H])(O[H])C([H])(O[H])C3([H])(O[H]))	CHEBI:64901	4.1757	ChEBI=CHEBI:64901	57339218	LOUWELXLLQURSP-UHFFFAOYSA-N	[H]OC=1C([H])=C([H])C(O[H])=C(C=1([H]))C(=O)N([H])C([H])([H])C([H])([H])C([H])([H])N([H])C([H])([H])C([H])([H])C([H])([H])C([H])([H])N([H])C(=O)C=2C([H])=C(O[H])C([H])=C([H])C=2(O[H])	396.01477 31;	0	0	0	0	0	0	0.00186624	0	0.000771108	0.000740509	0.000674025	0.000574771	0.000748181	0.00117105	0.0014148	0.000784759	0.00064315	0.00100895	0.000569366	0.00106765	0.00138462	0.00124897	0.00105394	0.000528237	0.000513844	0.000868259	0.00101594	0.00101001	0.00080313	0.00188444	0.00073019	0.000644062	0.00050619
117_RPPOS	1.36	208.154	[M+H]+	HMDB30354	4.2875	ChEBI=CHEBI:2815,FooDB=FDB002199,HMDB=HMDB30354,KNApSAcK=C00001962,UNPD=UNPD74	442505	JICZMZVYTMAXGX-KHSUWTBESA-N	[H]N=C1N([H])C(=O)C([H])(C([H])([H])[H])C2([H])(N1C(C([H])=C([H])[H])(C([H])([H])[H])C([H])([H])C2([H])([H]))	C00002312	4.1246	ChEBI=CHEBI:2552,KNApSAcK=C00002312,UNPD=UNPD32950	442841	OWOGBGTWYNGTCR-UHFFFAOYNA-N	[H]C([H])=C(C([H])([H])[H])C2([H])(N=C1N([H])C(C([H])([H])[H])(C([H])([H])[H])C([H])([H])C(=O)N1C2([H])([H]))	65.26569 11;67.50569 15;68.46796 88;70.3877 1279;71.23222 10;72.55639 112;74.41019 253;77.4308 66;79.43204 317;81.2945 132;81.95341 12;83.43761 17;86.41748 170;87.72301 53;88.35951 1042;90.47442 20;94.23367 351;95.28426 19;96.38237 1120;97.42921 39;98.4218 56;102.17393 32;104.39595 19;110.41205 17;114.40605 419;115.42255 80;116.35445 79;122.49216 14;132.28371 830;132.89792 18;142.56949 11;144.300…	0	0	0	0	0	0	0	0	0	0	0	0	0	0	0.000226409	0	0	0	0	0	0	0	0	0	0	0	0	0	0	0	0	0	0.000153129
27_RPNEG	5.77	129.056	[M-H]-	4-Methyl-2-oxopentanoic acid	4.1636	BMDB=BMDB00695,ChEBI=CHEBI:48430; CHEBI:17865,DrugBank=DB03229,ECMDB=ECMDB00695,HMDB=HMDB00695,KNApSAcK=C00019677,PlantCyc=2K-4CH3-PENTANOATE,PubChem=70; 3527278,SMPDB=PW_C000547,T3DB=T3D4426,UNPD=UNPD79880,YMDB=YMDB00388	70	BKAJNAXTPSGJCU-UHFFFAOYSA-N	[H]OC(=O)C(=O)C([H])([H])C([H])(C([H])([H])[H])C([H])([H])[H]	3-Methyl-2-oxopentanoic acid	4.0921	BMDB=BMDB00491,ChEBI=CHEBI:15614; CHEBI:28379; CHEBI:28654; CHEBI:35146; CHEBI:35932,ECMDB=ECMDB00491; ECMDB04091,FooDB=FDB021447,HMDB=HMDB00491,PlantCyc=2-KETO-3-METHYL-VALERATE,PubChem=439286; 6857401; 47; 4298878,SMPDB=PW_C000373,T3DB=T3D4424,YMDB=YMDB00168	439286	JVQYSWDUAOAHFM-UHFFFAOYNA-N	[H]OC(=O)C(=O)C([H])(C([H])([H])[H])C([H])([H])C([H])([H])[H]	102.04398 27;	0.00639436	0.00564248	0.00699915	0.00109461	0.00640832	0.011911	0.00707022	0.00657389	0.0069767	0.00659258	0.00884649	0.00580033	0.00556031	0.00740734	0.00294582	0.00879232	0.00667521	0.00921654	0.00512851	0.00781599	0.0108631	0.00745634	0.0102231	0.0123499	0.00337535	0.0046123	0.00446394	0.00446084	0.00717864	0.00269259	0.0153236	0.00560273	0.0151224
443_RPPOS	22.4	654.333	[M+H]+	CHEBI:80009	4.1391	ChEBI=CHEBI:80009	461207	SSIBMWPFXYSVEK-CUPIEXAXSA-N	[H]OC([H])(C([H])([H])C([H])(N([H])C(=O)OC([H])([H])C1=C([H])N=C([H])C([H])=C1([H]))C([H])([H])C2=C([H])C([H])=C([H])C([H])=C2([H]))C([H])(N([H])C(=O)C([H])(N([H])C(=O)OC([H])([H])C3=NC([H])=C([H])C([H])=C3([H]))C([H])(C([H])([H])[H])C([H])([H])[H])C([H])([H])C4=C([H])C([H])=C([H])C([H])=C4([H])							215.23277 17;249.11725 15;281.52621 15;305.22 13;311.12842 51;319.38788 12;337.09259 15;361.70178 70;369.70813 15;398.30652 13;423.48309 20;468.33484 23;469.28992 17;479.73962 30;494.50604 12;507.27795 13;516.32782 25;538.96613 14;542.39056 30;549.58612 16;554.49103 75;562.17462 23;572.53381 13;581.15619 133;592.46375 13;593.49506 136;594.50433 32;595.10516 20;618.12054 53;624.31207 20;625.97266 …	0.00298366	0.00286374	0.0028764	0.00430728	0.00333408	0.0036393	0.00348386	0.00296343	0.00435951	0.00416578	0.00383779	0.00416371	0.00466818	0.0033142	0.00186351	0.00534066	0.0050249	0.0032755	0.00363125	0.00578005	0.00216123	0.00247609	0.00340054	0.00444179	0.0034681	0.00278805	0.0031271	0.00344226	0.00234679	0.00332132	0.00364464	0.00467753	0.00352357
1053_RPNEG	3.99	434.123	[M-H]-	DB07334	3.9404	DrugBank=DB07334,PubChem=4369497	4369497	HTIZPBXCJPQDEM-UHFFFAOYSA-N	[H]C1=NC(=C([H])C([H])=C1([H]))C=2C([H])=C([H])C([H])=C(C=2([H]))C=3OC(=NC=3([H]))N([H])C4=C([H])C(=C([H])C([H])=C4(OC([H])([H])[H]))S(=O)(=O)C([H])([H])C([H])([H])[H]							160.88583 11;177.10257 17;179.28809 18;254.05057 129;262.07471 11;272.23981 142;288.02203 250;306.05026 14667;415.67267 11;433.75595 11;	0	0	0	0	0	0	0	0	0	0	0	0	0.000208593	8.43773e-05	0	0.000298425	0.000546646	0.000774983	0	0.000224105	6.85643e-05	0.00060375	0.000359262	0.000405473	0.000699745	0.000343363	0.000628241	0.000754915	0.000716097	0.000627086	0.00142754	0.00131055	0.000988798
[truncated: 15 more columns]
